# Supplementary material for: Altered hydroxymethylation is seen at regulatory regions in pancreatic cancer and regulates oncogenic pathways
Source: PubMed Central journal article supplement — Genome Res. 2017 Nov;27(11):1830–42. doi: 10.1101/gr.222794.117 (PMC5668941; doi:10.1101/gr.222794.117), 2017-11

**Supplemental\_Fig\_S1.** Correlation of 5-hmC with TET isoforms and tumor stage: (A) Relative *TET2* and (B) *TET3* isoform expression was correlated with %5-hmC and revealed a positive correlation. (C) No significant differences were observed between %5-hmC content in primary or metastatic origins of cell lines.

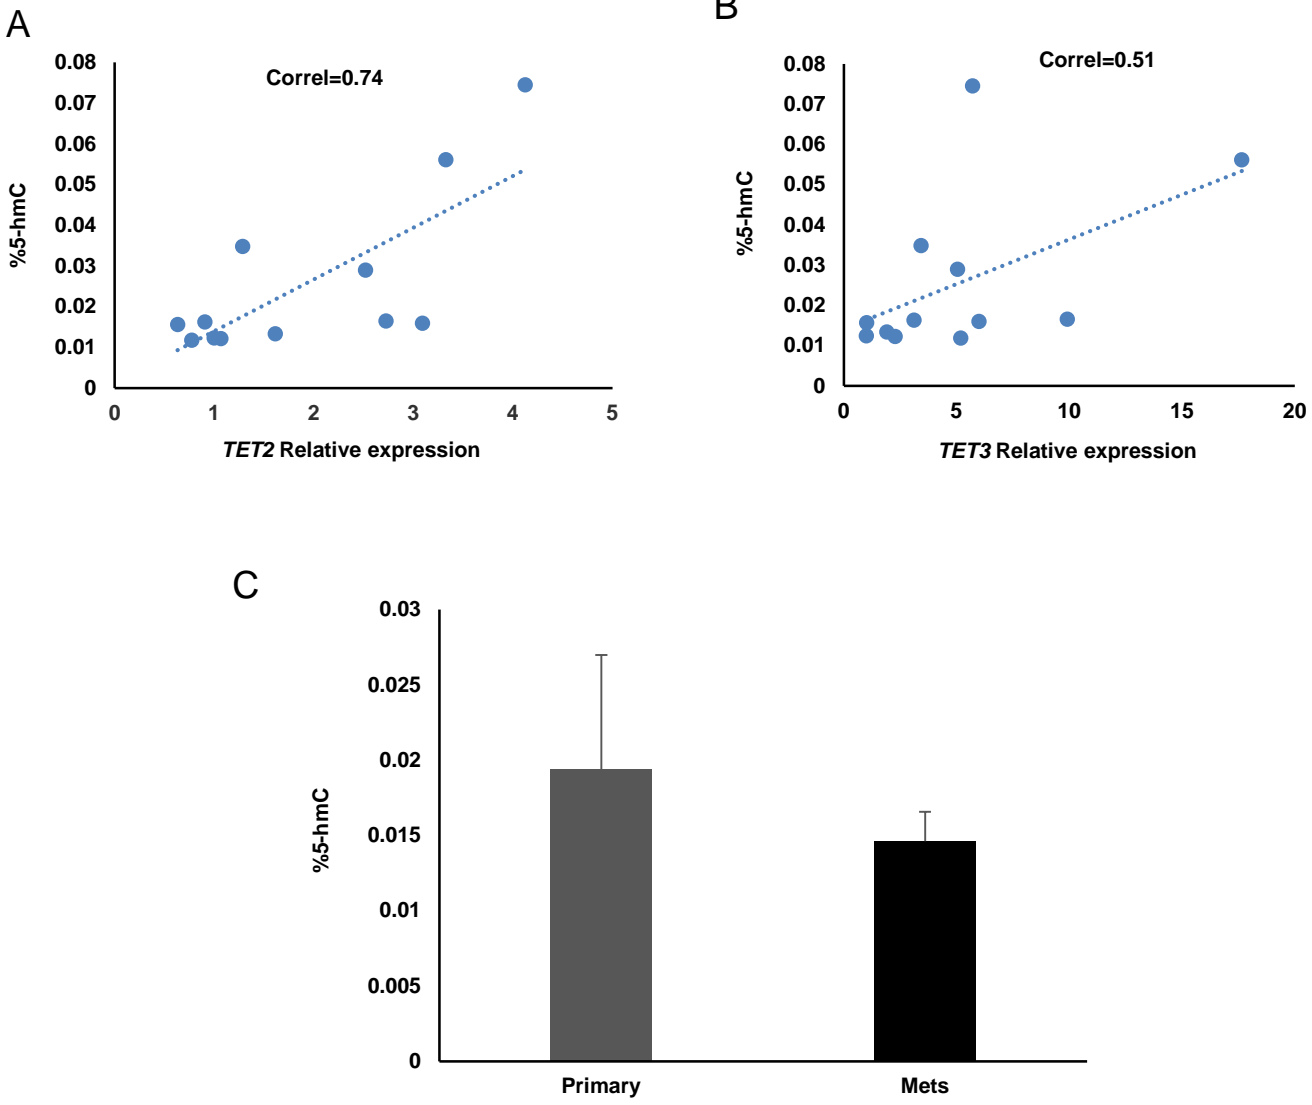

Supplement: supp_gr.222794.117_Supplemental_Fig_S1.pdf [file supp_gr.222794.117_Supplemental_Fig_S1.pdf]
