# Supplementary material for: Altered hydroxymethylation is seen at regulatory regions in pancreatic cancer and regulates oncogenic pathways
Source: PubMed Central journal article supplement — Genome Res. 2017 Nov;27(11):1830–42. doi: 10.1101/gr.222794.117 (PMC5668941; doi:10.1101/gr.222794.117), 2017-11

**Supplemental\_Fig\_S4.** ATAC-seq peaks are seen at promoters of known pancreatic cancer oncogenes. Examples of highly expressed (A) *VEGFA*, (B) *KRAS* and (C) *BRD4* oncogenes, show greater ATAC-seq peaks in pancreatic cancer cells when compared to controls.

A

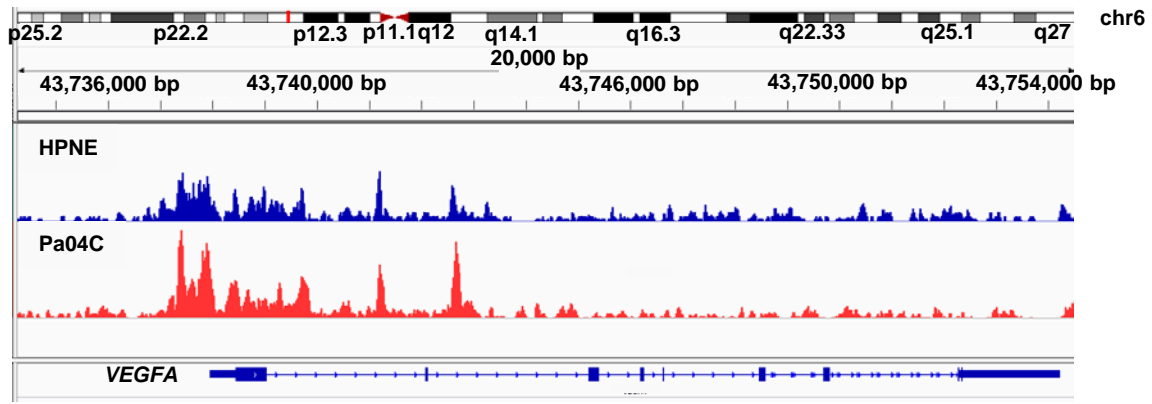

B

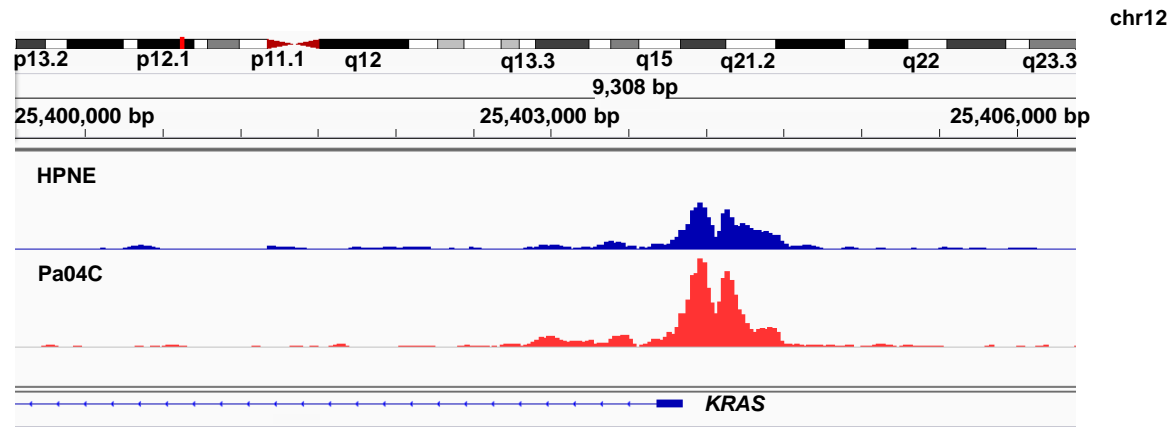

C

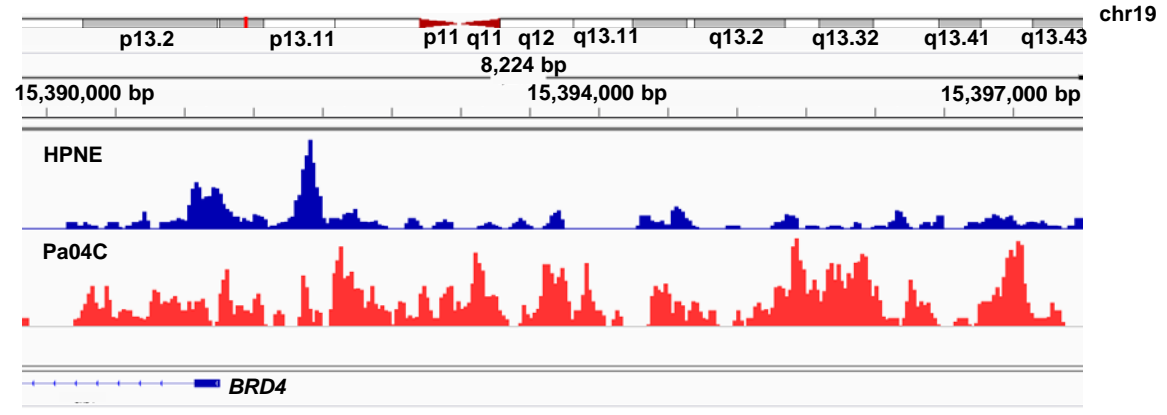

Supplement: supp_gr.222794.117_Supplemental_Fig_S4.pdf [file supp_gr.222794.117_Supplemental_Fig_S4.pdf]
