# Supplementary material for: Altered hydroxymethylation is seen at regulatory regions in pancreatic cancer and regulates oncogenic pathways
Source: PubMed Central journal article supplement — Genome Res. 2017 Nov;27(11):1830–42. doi: 10.1101/gr.222794.117 (PMC5668941; doi:10.1101/gr.222794.117), 2017-11

**Supplemental\_Fig\_S6.** Example of highly expressed *BRD4*, *KRAS* and *STAT3* genes show higher amounts of specific promoter 5-hmC in pancreatic cancer cells (Pa04C) when compared to controls (HPNE)

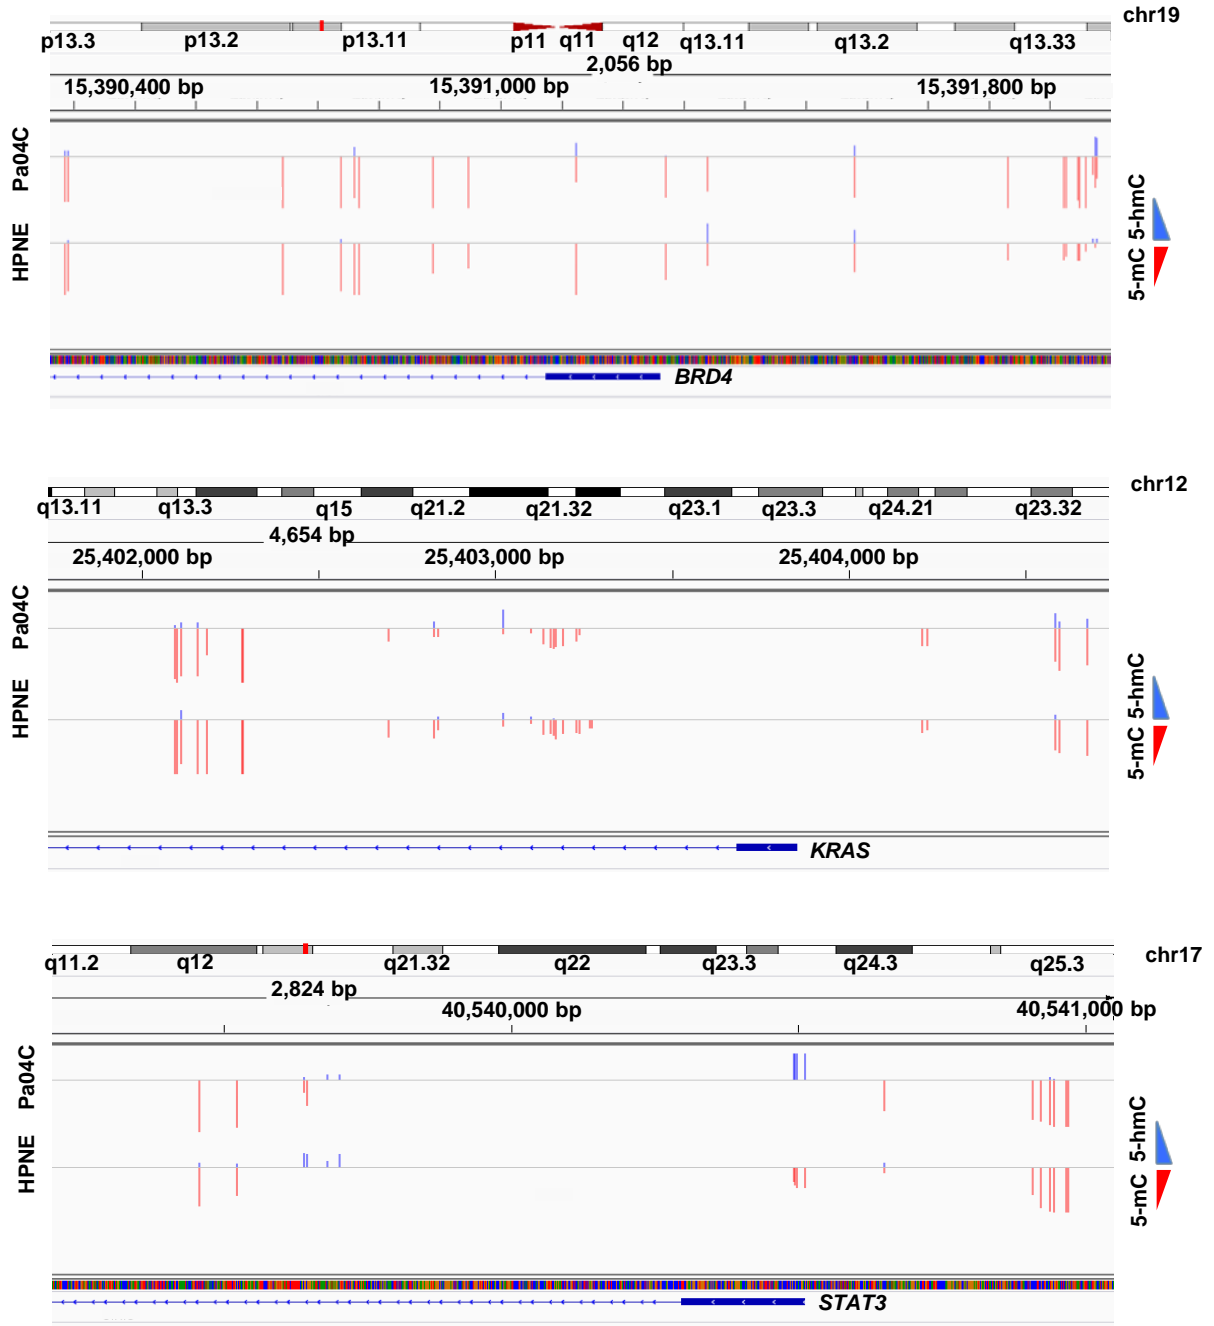

Supplement: supp_gr.222794.117_Supplemental_Fig_S6.pdf [file supp_gr.222794.117_Supplemental_Fig_S6.pdf]
