# Supplementary material for: Altered hydroxymethylation is seen at regulatory regions in pancreatic cancer and regulates oncogenic pathways
Source: PubMed Central journal article supplement — Genome Res. 2017 Nov;27(11):1830–42. doi: 10.1101/gr.222794.117 (PMC5668941; doi:10.1101/gr.222794.117), 2017-11
Supplement: supp_gr.222794.117_Supplemental_Fig_S7.pdf [file supp_gr.222794.117_Supplemental_Fig_S7.pdf]

**Supplemental\_Fig\_S7.** Gene set enrichment analysis showed that 5-hmC associated transcriptional changes are similar to known cancer associated gene signatures

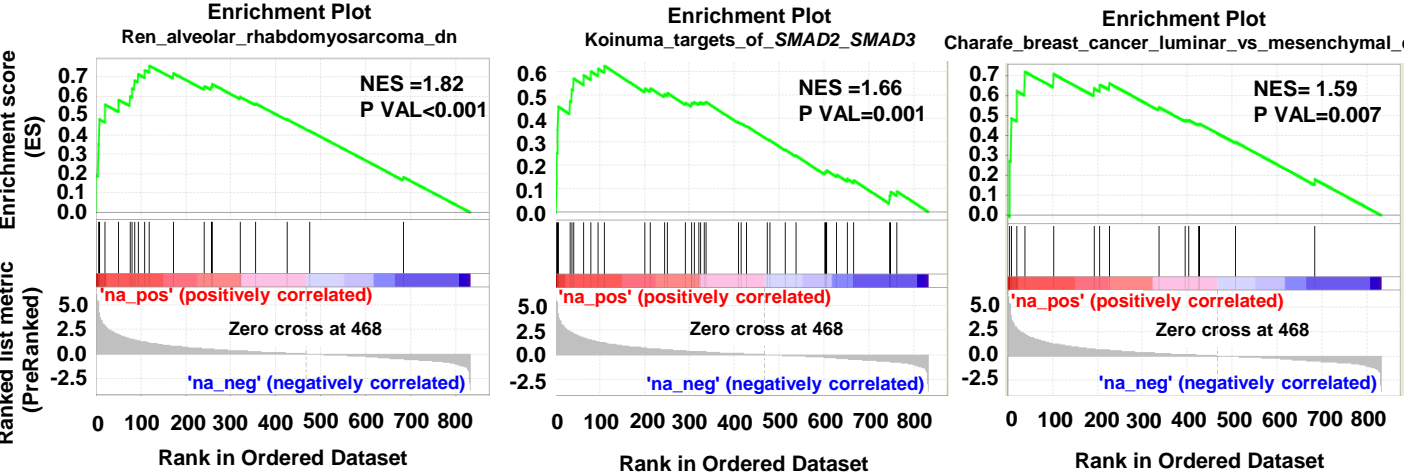

█ Enrichment profile   
 █ Hits   
 █ Ranking metric scores
