# Supplementary material for: Altered hydroxymethylation is seen at regulatory regions in pancreatic cancer and regulates oncogenic pathways
Source: PubMed Central journal article supplement — Genome Res. 2017 Nov;27(11):1830–42. doi: 10.1101/gr.222794.117 (PMC5668941; doi:10.1101/gr.222794.117), 2017-11

**Supplemental\_Fig\_S8.** Ki67 expression is decreased after JQ1 treatment in vivo. Immunohistochemistry and H&E stained sections from pancreatic cancer (Pa04C) xenografts per treatment arm. A marked decrease in the proliferation marker Ki67 was observed in xenografts treated with JQ1.

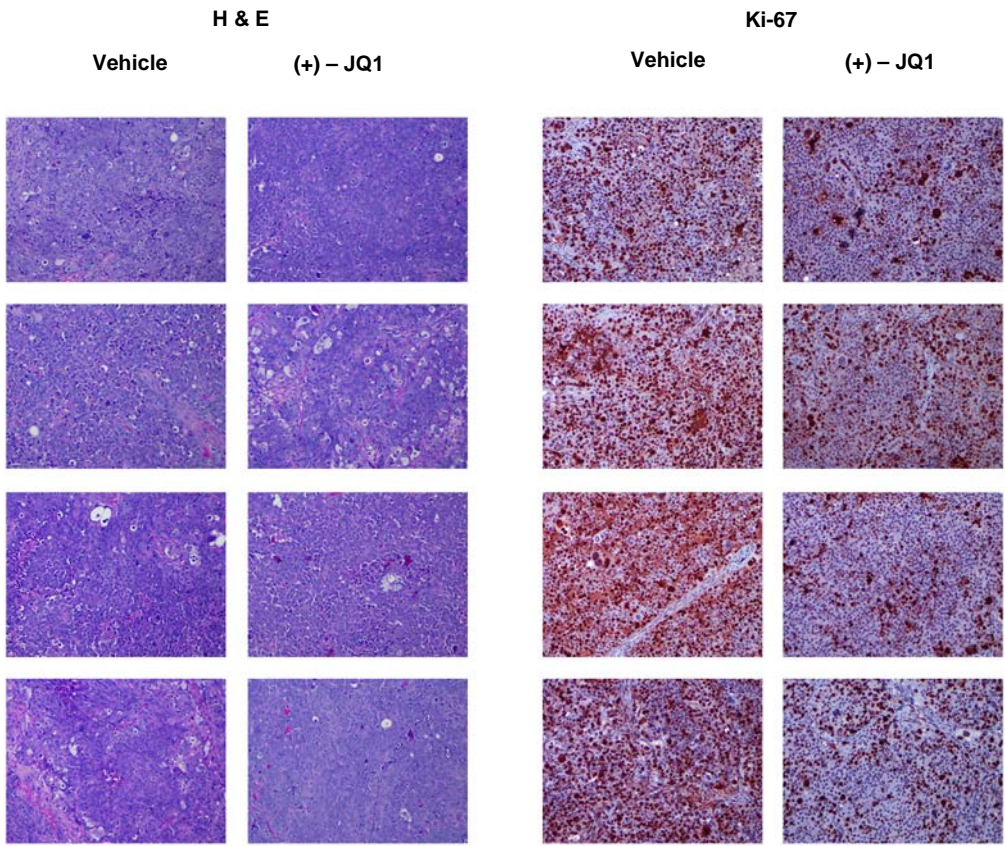

Supplement: supp_gr.222794.117_Supplemental_Fig_S8.pdf [file supp_gr.222794.117_Supplemental_Fig_S8.pdf]
