# Supplementary material for: Altered hydroxymethylation is seen at regulatory regions in pancreatic cancer and regulates oncogenic pathways
Source: PubMed Central journal article supplement — Genome Res. 2017 Nov;27(11):1830–42. doi: 10.1101/gr.222794.117 (PMC5668941; doi:10.1101/gr.222794.117), 2017-11
Supplement: supp_gr.222794.117_Supplemental_Table_S2_and_S3.pdf [file supp_gr.222794.117_Supplemental_Table_S2_and_S3.pdf]

**Supplemental\_Table\_S2: Sequencing metrics for OXBS and RNAseq assays**

|                         | Cell Type | Average Coverage | Read Pairs Examined |
|-------------------------|-----------|------------------|---------------------|
| Bisulfite Seq           | HPNE      | 12.3             | 91271758            |
| Bisulfite Seq           | Pa04C     | 12.6             | 103154550           |
| Oxidative Bisulfite Seq | HPNE      | 11.7             | 98644959            |
| Oxidative Bisulfite Seq | Pa04C     | 12.5             | 107559150           |
| RNA-seq                 | HPNE      | 4.1              | 99378766            |
| RNA-seq                 | Pa04C     | 5.5              | 162875219           |

**Supplemental\_Table\_S3: 5-hmC and 5-mC in OXBS assays**

|                     |          |
|---------------------|----------|
| Total CpGs examined | 11296328 |
| 5-hmC in HPNE       | 73735    |
| 5-hmC in Pa04C      | 67989    |
| 5-mC in HPNE        | 8521003  |
| 5-mC in Pa04C       | 9823675  |
