# Supplementary material for: Altered hydroxymethylation is seen at regulatory regions in pancreatic cancer and regulates oncogenic pathways
Source: PubMed Central journal article supplement — Genome Res. 2017 Nov;27(11):1830–42. doi: 10.1101/gr.222794.117 (PMC5668941; doi:10.1101/gr.222794.117), 2017-11
Supplement: supp_gr.222794.117_Supplemental_Table_S4.pdf [file supp_gr.222794.117_Supplemental_Table_S4.pdf]

**Supplemental\_Table\_S4 : GSEA shows gene sets similar to differentially expressed genes associated with 5-hmC changes**

| <b>NAME</b>                                       | <b>NES</b> | <b>NOM p-val</b> |
|---------------------------------------------------|------------|------------------|
| REN_ALVEOLAR_RHABDOMYOSARCOMA_DN                  | 1.966373   | <0.001           |
| KOINUMA_TARGETS_OF_SMAD2_OR_SMAD3                 | 1.765127   | <0.001           |
| WANG_SMARCE1_TARGETS_DN                           | 1.746358   | <0.001           |
| KIM_WT1_TARGETS_DN                                | 1.680485   | 0.0118           |
| TONKS_TARGETS_OF_RUNX1_RUNX1T1_FUSION_MONOCYTE_UP | 1.654752   | <0.001           |
| BRUINS_UVC_RESPONSE_VIA_TP53_GROUP_B              | 1.622081   | <0.001           |
| STEIN_ESRRA_TARGETS                               | 1.620892   | <0.001           |
| LIM_MAMMARY_STEM_CELL_UP                          | 1.611176   | <0.001           |
| LEI_MYB_TARGETS                                   | 1.606405   | 0.0282           |
| CHARAFE_BREAST_CANCER_LUMINAL_VS_MESENCHYMAL_DN   | 1.596172   | <0.001           |
| DELYS_THYROID_CANCER_UP                           | 1.571922   | 0.0108           |
| MILI_PSEUDOPODIA_CHEMOTAXIS_DN                    | 1.569681   | <0.001           |
| STARK_PREFRONTAL_CORTEX_22Q11_DELETION_DN         | 1.542456   | 0.0215           |
| DUTERTRE ESTRADIOL_RESPONSE_24HR_DN               | 1.541725   | <0.001           |
| RICKMAN_METASTASIS_DN                             | 1.524169   | 0.0241           |
| CHICAS_RB1_TARGETS_SENESCENT                      | 1.504618   | 0.0227           |
