# Supplementary material for: Altered hydroxymethylation is seen at regulatory regions in pancreatic cancer and regulates oncogenic pathways
Source: PubMed Central journal article supplement — Genome Res. 2017 Nov;27(11):1830–42. doi: 10.1101/gr.222794.117 (PMC5668941; doi:10.1101/gr.222794.117), 2017-11
Supplement: supp_gr.222794.117_Supplemental_Table_S7_scripts.pdf [file supp_gr.222794.117_Supplemental_Table_S7_scripts.pdf]

### **Supplementary Table S7 : Bioinformatic scripts used in genomic analysis**

These scripts were used to generate the figures in the paper, processing data from its raw form through the intermediate data structures needed to produce the final figures.

1. Colocalization: These are python script that take in processed bam files, and sets of genomic locations, and produce the colocalization plots.
2. OXBS data analysis: Sanchari/{j432,J446,J432\_j446, examine\_mc\_hmc}: These are the scripts used to process/analyze the OXBS data.
3. ATAC-seq analysis: Sanchari/{j455,j515,j455\_J515}: These are the scripts used to process/analyze the atac-seq datasets
4. Combined OXBS and ATAC-seq analysis: Sanchari/oxbs\_atac: scripts to examine regions covered by oxbs and atac-seq data.
5. Correlation of RNA-seq qith ATAC-seq and hmC-seal and OXBS: (Sanchari/{peaks\_rna, rnaseq}: scripts to examine rna-seq datasets and colocalization with other protocols: atac, oxbs, chip-seq.
6. Sanchari/filterCpg: scripts to filter loci based on CpG status.
7. Sanchari/homer\_panc: scripts used in motif analysis

All scripts have been deposited at [https://github.com/VermaLab/hmcPaper\\_scripts2](https://github.com/VermaLab/hmcPaper_scripts2)

```
==> ./colocalization/commands1_rnaseq.sh <==
```

```
#atac seq peaks, RNA reads  
#####3333
```

```
#run from cluster
```

```
#qsub runPeakProfiles.sh test2 hpneHmc_strandedPeakSummits.txt  
/home/kpradha1/projects/sanchari/rnaseq/HPNE.AC1FL7ACXX.lane_1_P0_I5.hg19.gsnap-  
rna-alignment.bam 3000  
cut -f1,2,6 hpne_strandedPeakSummits.txt > hpne_atac.txt  
cut -f1,2,6 jd_strandedPeakSummits.txt > jd_atac.txt
```

```
qsub runPeakProfiles.sh hpneAtacPeaks_hpneRna hpne_atac.txt  
/home/kpradha1/projects/sanchari/rnaseq/HPNE.AC1FL7ACXX.lane_1_P0_I5.hg19.gsnap-  
rna-alignment.bam 3000  
qsub runPeakProfiles.sh jdAtacPeaks_jdRna jd_atac.txt  
/home/kpradha1/projects/sanchari/rnaseq/JRN.AD0C99ABXX.lane_8_P0_I2.hg19.gsnap-rna-  
alignment.bam 3000
```

```
#need to prepare the atac-seq DIFF peaks  
#use the macs2 run where the other samples was used as control
```

```
#1. need to make the stranded peak summits files for the diffs  
#.../sanchari/peaks_rna/annotationPeaks.r
```

```
cut -f1,2,6 hpne-jd_strandedPeakSummits.txt > hpne-jd_atac.txt  
cut -f1,2,6 jd-hpne_strandedPeakSummits.txt > jd-hpne_atac.txt
```

```
#this keeps crashing. maybe try to  
#take out all the non chr* entries  
grep -v hpne-jd_atac.txt -e "^chr."
```

```
grep -v jd-hpne_atac.txt -e "^chr[^\_]\+_" > jd-hpne_atac1.txt  
grep -v hpne-jd_atac.txt -e "^chr[^\_]\+_" > hpne-jd_atac1.txt
```

```
qsub runPeakProfiles.sh hpne-jdAtacPeaks_hpneRna hpne-jd_atac1.txt  
/home/kpradha1/projects/sanchari/rnaseq/HPNE.AC1FL7ACXX.lane_1_P0_I5.hg19.gsnap-  
rna-alignment.bam 3000  
qsub runPeakProfiles.sh jd-hpneAtacPeaks_jdRna jd-hpne_atac1.txt  
/home/kpradha1/projects/sanchari/rnaseq/JRN.AD0C99ABXX.lane_8_P0_I2.hg19.gsnap-rna-  
alignment.bam 3000
```

```
#get plots of the JD gain/loss peak sets
```

```
#first, get stranded info for the peak sets  
#/hpc_home/projects/sanchari/peaks_rna/annotatePeaks.r  
#peaks.atac.jd.gain.1k.txt  
#peaks.atac.jd.loss.1k.txt
```

```
cut -f1,2,6 peaks.atac.jd.gain.1k_stranded.txt > jdGain1k_atac.txt  
cut -f1,2,6 peaks.atac.jd.loss.1k_stranded.txt > jdLoss1k_atac.txt
```

```
qsub runPeakProfiles.sh jdGain1kAtacPeaks_jdRna jdGain1k_atac.txt  
/home/kpradha1/projects/sanchari/rnaseq/JRN.AD0C99ABXX.lane_8_P0_I2.hg19.gsnap-rna-  
alignment.bam 3000
```

```
qsub runPeakProfiles.sh jdLoss1kAtacPeaks_hpneRna jdLoss1k_atac.txt
/home/kpradha1/projects/sanchari/rnaseq/HPNE.AC1FL7ACXX.lane_1_P0_I5.hg19.gsnap-
rna-alignment.bam 3000
```

```
#hmc sites, RNA reads
#no..have to add strandedness info.
#####
```

```
#todo
#../sanchari/peaks_rna/annotationPeaks.r
```

```
qsub runPeakProfiles.sh hpneHmc_hpneRna hpne_strandedHmc.txt
/home/kpradha1/projects/sanchari/rnaseq/HPNE.AC1FL7ACXX.lane_1_P0_I5.hg19.gsnap-
rna-alignment.bam 3000
qsub runPeakProfiles.sh jdHmc_jdRna jd_strandedHmc.txt
/home/kpradha1/projects/sanchari/rnaseq/JRN.AD0C99ABXX.lane_8_P0_I2.hg19.gsnap-rna-
alignment.bam 3000
```

```
#oxbs hmc sites, atac seq reads
#####33
```

```
#prep oxbs sites
cat hmc_sig0.01_commonSites1_jd.bed | cut -f1,2 | sed 's/.*&\t+/' >| jd_hmc.txt
cat hmc_sig0.01_commonSites1_hpne.bed | cut -f1,2 | sed 's/.*&\t+/' >|
hpne_hmc.txt
```

```
qsub runPeakProfiles.sh hpneHmcSites_hpneAtac hpne_hmc.txt
/home/kpradha1/projects/sanchari/j455/hpne_sorted_mdup.bam 3000
qsub runPeakProfiles.sh jdHmcSites_jdAtac jd_hmc.txt
/home/kpradha1/projects/sanchari/j455_j515/jd_sorted_mdup_merged.bam 3000
```

```
#oxbs mc sites, atac seq reads
#####33
#prep mc files
cat mc_commonSites1_jd.bed | cut -f1,2 | sed 's/.*&\t+/' >| jd_mc.txt
cat mc_commonSites1_hpne.bed | cut -f1,2 | sed 's/.*&\t+/' >| hpne_mc.txt
```

```
qsub runPeakProfiles.sh hpneMcSites_hpneAtac_400k hpne_mc.txt
/home/kpradha1/projects/sanchari/j455/hpne_sorted_mdup.bam 3000
qsub runPeakProfiles.sh jdMcSites_jdAtac_400k jd_mc.txt
/home/kpradha1/projects/sanchari/j455_j515/jd_sorted_mdup_merged.bam 3000
```

```
#mc files with rna
#####
#run annotation to get strand info
```

```

#stat3 sites, atac seq reads
#####33

#prepare the stat3 peaks from bed files

cat jd13d_stat3_summits.bed | cut -f1,2 | sed 's./.*&\t+/' | grep -v "hs37d5" | sed
's./.*&\t+/' >| jd_stat3.txt
cat hpne_stat3_summits.bed | cut -f1,2 | sed 's./.*&\t+/' | grep -v "hs37d5" | sed
's./.*&\t+/' >| hpne_stat3.txt

qsub runPeakProfiles.sh hpneStat3Sites_hpneAtac hpne_stat3.txt
/home/kpradha1/projects/sanchari/j455/hpne_sorted_mdup.bam 3000
qsub runPeakProfiles.sh jdStat3Sites_jdAtac jd_stat3.txt
/home/kpradha1/projects/sanchari/j455_j515/jd_sorted_mdup_merged.bam 3000

#prepare stranded stat3 files with rna
#add chr to the front of each row
cat jd_stat3_summits_stranded.txt | sed 's./.*&\t+/' >
jd_stat3_summits_stranded1.txt
cat hpne_stat3_summits_stranded.txt | sed 's./.*&\t+/' >
hpne_stat3_summits_stranded1.txt

qsub runPeakProfiles.sh jdstat3Peaks_jdRna jd_stat3_summits_stranded1.txt
/home/kpradha1/projects/sanchari/rnaseq/JRN.AD0C99ABXX.lane_8_P0_I2.hg19.gsnap-rna-
alignment.bam 3000
qsub runPeakProfiles.sh hpnestat3Peaks_hpneRna hpne_stat3_summits_stranded1.txt
/home/kpradha1/projects/sanchari/rnaseq/HPNE.AC1FL7ACXX.lane_1_P0_I5.hg19.gsnap-
rna-alignment.bam 3000

#move all the pics to a separate folder
ls */colocPlot.png | sed 's$\(.*\)\\\(.*\) $cp & pics1\\\'1\'.png$' | bash

#####

bamfile1="/home/kpradha1/Desktop/data/sanchari/pancreatic/rnaseq/bam/HPNE.AC1FL7ACX
X.lane_1_P0_I5.hg19.gsnap-rna-alignment.bam"

samtools view -b $bamfile1 chr1:561524-567524 | samtools mpileup -

samtools mpileup $bamfile1 -r chr1:561524-567524 | cut -f1-5

#run from my comp
python makeColocPlots.py test2

==> ./colocalization/getPeakProfiles_preload.py <==
#from multiprocessing import Pool

```

```

from functools import partial
from itertools import chain
import time
import peakProfiles as pp
import numpy as np
import matplotlib.pyplot as plt
import os
import sys
import HTSeq as ht
import random

#reload(pp)

outFolder = "test5"
#siteFile = "hpneHmc_strandedPeakSummits.txt"
siteFile = "hpne_mc.txt"
siteFile = "hpne_stat3.txt"
siteFile = "hpne_hmc_p05.bed"
#bamfile1 =
"/home/kpradha1/projects/sanchari/rnaseq/HPNE.AC1FL7ACXX.lane_1_P0_I5.hg19.gsnap-
rna-alignment.bam"
#bamfile1 =
"/home/kpradhan/Desktop/hpc_home/projects/sanchari/rnaseq/HPNE.AC1FL7ACXX.lane_1_P0
_I5.hg19.gsnap-rna-alignment.bam"
bamfile1 =
"/home/kpradhan/Desktop/hpc_home/projects/sanchari/j455/hpne_sorted_mdup.bam"
bamfile1 =
"/home/kpradhan/Desktop/hpc_home/projects/sanchari/j455/hpne_sorted_mdup_chr10.bam"
W = 3000
#K=200000 #only look at this number of sites due to memory constraints
K=400000 #only look at this number of sites due to memory constraints

#command line arguments
outFolder = sys.argv[1]
siteFile = sys.argv[2]
bamfile1 = sys.argv[3]
W = int(sys.argv[4])

print ("outfolder: %s" % outFolder)
print ("siteFile: %s" % siteFile)
print ("bamfile: %s" % bamfile1)
print ("W: %d" % W)

#load the sites
sites = pp.getPeakSitesFromStrandedBed(siteFile)

#limit the number of sites to save memory
if len(sites) > K:
    ix = np.sort(random.sample(range(0, len(sites)), K))
    sites = sites[ix]

```

```

#turn any sites with * strands into .
for s in sites:
    if s['strand'] != "+" and s['strand'] != "-":
        s['strand'] = "."

#take out any sites that are lower than the halfwidth
ix = sites['site'] > W
sites = sites[ix]

#first thing...check that the sites match the notation of the bam file
sites, nMatch = pp.checkSiteNotation(sites, bamfile1)
len(sites)
print("number of sites matching bam chroms: %d" % nMatch)

#get rid of the sites that have no chromosome entry in the bam file

#save results in a folder
if not os.path.exists(outFolder):
    os.makedirs(outFolder)

#save some batch information
with open(os.path.join(outFolder, "batch_info.txt"), "w") as myfile:
    myfile.write("outFolder: %s\n" % outFolder)
    myfile.write("siteFile: %s\n" % siteFile)
    myfile.write("bamfile: %s\n" % bamfile1)
    myfile.write("W: %d\n" % W)
    myfile.write("#matching sites: %d\n" % nMatch)

#if all the sites are facing the same way, used * strand coverage
stranded = True
if len(np.unique(sites['strand'])) == 1:
    stranded = False
    sites['strand'] = "."

#load the entire bam into a genomic array
bam = ht.BAM_Reader(bamfile1)
#maybe, if all the site strands are *, don't strand coverage
coverage = ht.GenomicArray( "auto", stranded=stranded, typecode="i" )
#coverage = ht.GenomicArray( "auto", stranded=True, typecode="i" )
for i, almnt in enumerate(bam):
    if i % 1000000 == 0:
        print (i )
    #check for quality and pcr dups!
    if almnt.aligned and almnt.aQual > 0 and not almnt.pcr_or_optical_duplicate:
        coverage[ almnt.iv ] += 1

#reload(pp)
peakProfs = pp.getPeakProfilesFromCoverage(sites, coverage, halfwinwidth=3000,
stranded=stranded)

#or maybe use the mean
prof = np.sum(peakProfs, 0)
#the binned image

```

```

smallPeaks = pp.binPeakProfiles(peakProfs, K=100)

np.save(os.path.join(outFolder, "peakProfiles.npy"), peakProfs)
np.save(os.path.join(outFolder, "summedPP.npy"), prof)
np.save(os.path.join(outFolder, "binnedPP.npy"), smallPeaks)

==> ./colocalization/getPeakProfiles_noHeatmap_preload.py <==
#from multiprocessing import Pool
from functools import partial
from itertools import chain
import time
import peakProfiles as pp
import numpy as np
import matplotlib.pyplot as plt
import os
import sys
import HTSeq as ht
import random

#reload(pp)

outFolder = "test5"
#siteFile = "hpneHmc_strandedPeakSummits.txt"
siteFile = "hpne_mc.txt"
siteFile = "hpne_stat3.txt"
siteFile = "hpne_hmc_p05.bed"
#bamfile1 =
"/home/kpradha1/projects/sanchari/rnaseq/HPNE.AC1FL7ACXX.lane_1_P0_I5.hg19.gsnap-
rna-alignment.bam"
#bamfile1 =
"/home/kpradhan/Desktop/hpc_home/projects/sanchari/rnaseq/HPNE.AC1FL7ACXX.lane_1_P0
_I5.hg19.gsnap-rna-alignment.bam"
bamfile1 =
"/home/kpradhan/Desktop/hpc_home/projects/sanchari/j455/hpne_sorted_mdup.bam"
bamfile1 =
"/home/kpradhan/Desktop/hpc_home/projects/sanchari/j455/hpne_sorted_mdup_chr10.bam"
W = 3000
#K=200000 #only look at this number of sites due to memory constraints
K=400000 #only look at this number of sites due to memory constraints

#command line arguments
outFolder = sys.argv[1]
siteFile = sys.argv[2]
bamfile1 = sys.argv[3]
W = int(sys.argv[4])

print ("outfolder: %s" % outFolder)
print ("siteFile: %s" % siteFile)
print ("bamfile: %s" % bamfile1)
print ("W: %d" % W)

```

```

#load the sites
sites = pp.getPeakSitesFromStrandedBed(siteFile)

#turn any sites with * strands into .
for s in sites:
    if s['strand'] != "+" and s['strand'] != "-":
        s['strand'] = "."

#take out any sites that are lower than the halfwidth
ix = sites['site'] > W
sites = sites[ix]

#first thing...check that the sites match the notation of the bam file
sites, nMatch = pp.checkSiteNotation(sites, bamfile1)
len(sites)
print("number of sites matching bam chroms: %d" % nMatch)

#get rid of the sites that have no chromosome entry in the bam file

#save results in a folder
if not os.path.exists(outFolder):
    os.makedirs(outFolder)

#save some batch information
with open(os.path.join(outFolder, "batch_info.txt"), "w") as myfile:
    myfile.write("outfolder: %s\n" % outFolder)
    myfile.write("siteFile: %s\n" % siteFile)
    myfile.write("bamfile: %s\n" % bamfile1)
    myfile.write("W: %d\n" % W)
    myfile.write("#matching sites: %d\n" % nMatch)

#if all the sites are facing the same way, used * strand coverage
stranded = True
if len(np.unique(sites['strand'])) == 1:
    stranded = False
    sites['strand'] = "."

#load the entire bam into a genomic array
bam = ht.BAM_Reader(bamfile1)
#maybe, if all the site strands are *, don't strand coverage
coverage = ht.GenomicArray( "auto", stranded=stranded, typecode="i" )
#coverage = ht.GenomicArray( "auto", stranded=True, typecode="i" )
for i, almnt in enumerate(bam):
    if i % 100000 == 0:
        print (i )
    #check for quality and pcr dups!
    if almnt.aligned and almnt.aQual > 0 and not almnt.pcr_or_optical_duplicate:
        coverage[ almnt.iv ] += 1

#reload(pp)
#todo
##just save the summed Profile

```



```
peakProf = pp.getProfileFromCoverage(sites, coverage, halfwinwidth=3000,
stranded=stranded)
```

```
np.save(os.path.join(outFolder, "peakSums.npy"), peakProf)
```

```
==> ./colocalization/runPeakProfiles_noHeatmap.sh <==
```

```
#!/bin/bash
#$ -cwd
#$ -j n
#$ -l h_vmem=10G
#$ -pe smp 1
#$ -S /bin/bash
#$ -m e
#usage:
#qsub runPeakProfiles.sh asdlk asdfkka
#probably going to need more memory
module load scipy/0.14.0/python.2.7.8-atlas-3.11.30
module load python/2.7.8/gcc.4.4.7
module load HTSeq/0.6.1/python.2.7.8
module load numpy/1.9.0/python.2.7.8-atlas-3.11.30
module load matplotlib/1.4.3/python.2.7.8
```

```
outputFolder="test3"
#siteFile="hpneHmc_strandedPeakSummits.txt"
siteFile="hpne_atac.txt"
#bamFile="/home/kpradha1/projects/sanchari/rnaseq/HPNE.AC1FL7ACXX.lane_1_P0_I5.hg19
.gsnap-rna-alignment.bam"
bamFile="/home/kpradhan/Desktop/hpc_home/projects/sanchari/rnaseq/HPNE.AC1FL7ACXX.l
ane_1_P0_I5.hg19.gsnap-rna-alignment.bam"
W="3000"
```

```
outputFolder=$1
siteFile=$2
bamFile=$3
W=$4
```

```
echo $outputFolder
echo $siteFile
echo $bamFile
echo $W
```

```
#make a folder for storing intermediate result
#otherwise, might run out of space on default /tmp
python getPeakProfiles_noHeatmap_preload.py $outputFolder $siteFile $bamFile $W
```

```
#add a $ after the # if want email notification at job completion
# -M kith.pradhan@einstein.yu.edu
```

```
==> ./colocalization/peakProfiles.py <==
import numpy as np
```

```

import matplotlib.pyplot as plt
import glob
import os
import sys
import HTSeq as ht
import numpy.random as rd

def chunks(l, n):
    """Yield successive n-sized chunks from l."""
    for i in range(0, len(l), n):
        yield l[i:i + n]

#the bed file should have 3 columns
#chrom
#position start
#position end
#strand + or -
def getPeakSitesFromStrandedBed(pfile):
    peaks = np.loadtxt(pfile, dtype=object)
    #regions lists will all be the same format
    dt_sites = np.dtype(["chrom", "S5"), ("strand", "S1"), ("site", "int")])
    #x = [(str(a[0]), str(a[3]), int(a[2])) for a in peaks]
    x = [(str(a[0]), str(a[2]), int(a[1])) for a in peaks]
    return np.unique(np.array(x, dtype=dt_sites))

def getPeakSitesFromBed(pfile):
    peaks = np.loadtxt(pfile, dtype=object)
    #regions lists will all be the same format
    dt_sites = np.dtype(["chrom", "S5"), ("strand", "S1"), ("start", "int"),
("stop", "int")])
    x = [(str(a[1]), str(a[2]), int(a[3])-PROM_DIST, int(a[3])+PROM_DIST) for a in
peaks]
    sites_tss = np.unique(np.array(x, dtype=dt_sites))

#pfile = "peaks_jd13d_stat3Input.txt"
def getPeakSitesFromMacs(pfile):
    peaks = np.loadtxt(pfile, dtype=object)
    #regions lists will all be the same format
    dt_sites = np.dtype(["chrom", "S5"), ("strand", "S1"), ("start", "int"),
("stop", "int")])
    x = []
    for a in peaks:
        #mid = (int(a[2]) + int(a[1])) / 2
        #x = [(str(a[0]), "+", mid-200, mid+200) for a in peaks]
        x.append( (str(a[0]), "+", int(a[1]), int(a[2])) )
    #only retain proper chromosomes
    x = np.unique(np.array(x, dtype=dt_sites))
    ix = np.array([a[:3] == "chr" or a == "X" or a == "Y" for a in x["chrom"]])
    return x[ix]

#maybe only look at the peaks that pass a threshold
def getPeakMidsFromMacs(pfile, thresh=0):

```

```

peaks = np.loadtxt(pfile, dtype=object)
#regions lists will all be the same format
dt_sites = np.dtype(["chrom", "S5"), ("strand", "S1"), ("site", "int")]
x = []
for a in peaks:
    if thresh == 0 or float(a[5]) > thresh:
        mid = (int(a[2]) + int(a[1])) / 2
        x.append((str(a[0]), "+", mid))
        #x.append( (str(a[0]), "+", int(a[1]), int(a[2])) )
#only retain proper chromosomes
x = np.unique(np.array(x, dtype=dt_sites))
ix = np.array([a[:3] == "chr" or a == "X" or a == "Y" for a in x["chrom"]])
return x[ix]

def truncChr(c):
    if c.isdigit():
        return c
    elif c == "X" or c == "Y":
        return c
    else:
        return c[3:]

#how many sites have thee same notation as the bam file.
def checkSiteNotation(sites, bamfile):
    bam = ht.BAM_Reader(bamfile)
    #make sure the sites and bam files have same naming convention
    #
    #retrict sites to those that have an entry in the bam file
    #probably has bug dealing with X and Y.
    bamChroms = [x["SN"] for x in bam.get_header_dict()["SQ"]]
    sites = sites[np.in1d(sites["chrom"], bamChroms)]
    return sites, np.sum(np.in1d(sites["chrom"], bamChroms))

def getProfileFromCoverage(sites, coverage, halfwinwidth=3000, stranded=False):
    nSites = 0
    peakSums = np.zeros(2*halfwinwidth)
    #collect the sites as genomic intervals
    for i, pos in enumerate(sites):
        #print "%d of %d" %(i, len(sites))
        peakProfile = np.zeros(2*halfwinwidth)
        if i % 1000 == 0:
            print "%d of %d" %(i, len(sites))
        leftSide = pos["site"] - halfwinwidth
        if leftSide < 1:
            leftSide = 1
        rightSide = pos["site"] + halfwinwidth
        if (stranded):
            window = ht.GenomicInterval( str(pos["chrom"]), leftSide, rightSide,
str(pos["strand"]) )
        else:
            window = ht.GenomicInterval( str(pos["chrom"]), leftSide, rightSide,
".")
        #print (pos)
        #try this out 1-17-17
        wincvg = np.array(list(coverage[window]))
        #if the iterator has nothing, it'll throw an error

```

```

#wincvg = np.fromiter( coverage[window], dtype='i', count=2*halfwinwidth )
if (stranded):
    if pos["strand"] == "+":
        peakProfile += wincvg
    elif pos["strand"] == "-":
        peakProfile += wincvg[::-1]
else:
    peakProfile += wincvg
if (np.sum(peakProfile) > 0):
    peakSums += peakProfile
return peakSums

```

```

def getPeakProfilesFromCoverage(sites, coverage, halfwinwidth=3000,
stranded=False):
    peakProfs = []
    #collect the sites as genomic intervals
    for i, pos in enumerate(sites):
        #print "%d of %d" %(i, len(sites))
        peakProfile = np.zeros(2*halfwinwidth)
        if i % 1000 == 0:
            print "%d of %d" %(i, len(sites))
        leftSide = pos["site"] - halfwinwidth
        if leftSide < 1:
            leftSide = 1
        rightSide = pos["site"] + halfwinwidth
        if (stranded):
            window = ht.GenomicInterval( str(pos["chrom"]), leftSide, rightSide,
str(pos["strand"]) )
        else:
            window = ht.GenomicInterval( str(pos["chrom"]), leftSide, rightSide,
".")
        #print (pos)
        #try this out 1-17-17
        wincvg = np.array(list(coverage[window]))
        #if the iterator has nothing, it'll throw an error
        #wincvg = np.fromiter( coverage[window], dtype='i', count=2*halfwinwidth )
        if (stranded):
            if pos["strand"] == "+":
                peakProfile += wincvg
            elif pos["strand"] == "-":
                peakProfile += wincvg[::-1]
        else:
            peakProfile += wincvg
        if (np.sum(peakProfile) > 0):
            peakProfs.append(peakProfile)
    return np.array(peakProfs)

```

#need a way to determine if the bam file has notation as "chr10" or "10"

```

bamfile = "/home/kpradhan/Desktop/data/pancreas/test1/test3.bam"
def getPeakProfiles(sites, bamfile, halfwinwidth=3000):
    bam = ht.BAM_Reader(bamfile)
    #make sure the sites and bam files have same naming convention
    #
    #retrict sites to those that have an entry in the bam file
    #probably has bug dealing with X and Y.

```

```

bamChroms = [x["SN"] for x in bam.get_header_dict()["SQ"]]
bamChroms = ["chr"+c if c.isdigit() else c for c in bamChroms]
sites = sites[np.in1d(sites["chrom"], bamChroms)]
sites.shape
#
peakProfs = []
#collect the sites as genomic intervals
for i, pos in enumerate(sites):
    print "%d of %d" %(i, len(sites))
    peakProfile = np.zeros(2*halfwinwidth)
    if i % 1000 == 0:
        print "%d of %d" %(i, len(sites))
    #don't change the site notation here
    #sitechr = truncChr(pos["chrom"]) if hasChrPrefix else pos["chrom"]
    sitechr = pos["chrom"]
    window = ht.GenomicInterval( str(sitechr), pos["site"] - halfwinwidth,
pos["site"] + halfwinwidth, str(pos["strand"]) )
    #if (list(bam[window])):
    if next(bam[window], None) is not None:
        for almnt in bam[window]:
            if pos["strand"] == "+":
                a = almnt.iv.start - pos["site"] + halfwinwidth
                b = almnt.iv.end - pos["site"] + halfwinwidth
            if pos["strand"] == "-":
                a = pos["site"] + halfwinwidth - almnt.iv.end
                b = pos["site"] + halfwinwidth - almnt.iv.start
            peakProfile[a:b] += 1
        if (np.sum(peakProfile) > 0):
            peakProfs.append(peakProfile)
return np.array(peakProfs)

def binPeakProfiles(peakProfs, K=100):
    sums = [np.sum(p) for p in peakProfs]
    ix = np.argsort(sums)
    #
    #bin every 100 rows together
    smallX = []
    for i in range(0, len(peakProfs)-1, K):
        smallX.append(np.sum(np.array([peakProfs[j] for j in ix[i:(i+K)]]),0))
    return np.array(smallX)[::-1]

#prof is the aveage profile
#smallPeaks is the binned peak image
#cuts off 500 from either side
def savePeakPlots(outfile, prof, smallPeaks):
    #half width of the window
    W = len(prof)/2
    x = smallPeaks.ravel()
    vmax = np.sort(x)[np.round(len(x)*.80)]
    #
    plt.close()
    fig = plt.figure()
    fig.set_size_inches(18.5, 10.5)
    fig.suptitle(outfile)
    ax = plt.subplot(121)
    xran = np.arange(len(prof))-W
    plt.plot(xran[500:(-500)], prof[500:(-500)])
    ax = plt.subplot(122)

```

```

ax.set_xticklabels([])
ax.set_yticklabels([])
plt.imshow(smallPeaks[:, 500:(-500)],, aspect = "auto", vmax=vmax)
#plt.colorbar(orientation="horizontal")
plt.colorbar(orientation="vertical")
plt.savefig(outfile, dpi=100)
plt.close()

def savePeakPlots_part(outfile, prof, smallPeaks, throwPortion=0.20):
    rowStart = int(smallPeaks.shape[0]*throwPortion )
    rowEnd = smallPeaks.shape[0]
    #
    #half width of the window
    W = len(prof)/2
    x = smallPeaks.ravel()
    vmax = np.sort(x)[np.round(len(x)*.80)]
    #
    plt.close()
    fig = plt.figure()
    fig.set_size_inches(18.5, 10.5)
    fig.suptitle(outfile)
    ax = plt.subplot(121)
    xran = np.arange(len(prof))-W
    #
    test1 = np.sum(smallPeaks[rowStart:rowEnd, 500:(-500)],,0)
    plt.plot(xran[500:(-500)], test1)
    np.sum(smallPeaks[1000:4000, 500:(-500)],,0)
    #
    #plt.plot(xran[500:(-500)], prof[500:(-500)])
    ax = plt.subplot(122)
    ax.set_xticklabels([])
    ax.set_yticklabels([])
    #
    x = smallPeaks[rowStart:rowEnd, 500:(-500),].ravel()
    vmax = np.sort(x)[np.round(len(x)*.80)]
    plt.imshow(smallPeaks[rowStart:rowEnd, 500:(-500)],, aspect = "auto",
vmax=vmax)
    #plt.colorbar(orientation="horizontal")
    plt.colorbar(orientation="vertical")
    plt.savefig(outfile, dpi=100)
    plt.close()

#test

#peakmids_jd13d = getPeakMidsFromMacs(pfile)
#sites=peakmids_jd13d
def makePeakPlots(sites, bamfile, outfile, noChr=False):
    peakProfs = getPeakProfiles(bamfile, sites, 3000, noChr)
    #
    prof = np.sum(peakProfs, 0)
    smallPeaks = binPeakProfiles(peakProfs, K=100)
    x = smallPeaks.ravel()
    vmax = np.sort(x)[np.round(len(x)*.80)]
    #
    plt.close()

```

```

fig = plt.figure()
fig.suptitle(outfile)
ax = plt.subplot(121)
xran = np.arange(len(prof))-3000
plt.plot(xran[500:(-500)], prof[500:(-500)])
ax = plt.subplot(122)
ax.set_xticklabels([])
ax.set_yticklabels([])
plt.imshow(smallPeaks[:, 500:(-500)], aspect = "auto", vmax=vmax)
#plt.colorbar(orientation="horizontal")
plt.colorbar(orientation="vertical")
plt.savefig(outfile)
plt.close()

```

```

def clipFilename(ffile):
    return ffile[(ffile.rfind("/")+1):]

```

```

==> ./colocalization/getPeakProfiles.py <==

```

```

#from multiprocessing import Pool
from functools import partial
from itertools import chain
import time
import peakProfiles as pp
import numpy as np
import matplotlib.pyplot as plt
import os
import sys

```

```

#$reload(pp)

```

```

outFolder = "test3"
#siteFile = "hpneHmc_strandedPeakSummits.txt"
siteFile = "hpne_atac.txt"
#bamfile1 =
"/home/kpradha1/projects/sanchari/rnaseq/HPNE.AC1FL7ACXX.lane_1_P0_I5.hg19.gsnap-
rna-alignment.bam"
bamfile1 =
"/home/kpradhan/Desktop/hpc_home/projects/sanchari/rnaseq/HPNE.AC1FL7ACXX.lane_1_P0
_I5.hg19.gsnap-rna-alignment.bam"
W          = 3000

```

```

#command line arguments
outFolder = sys.argv[1]
siteFile = sys.argv[2]
bamfile1 = sys.argv[3]
W          = int(sys.argv[4])

```

```

print ("outfolder: %s" % outFolder)
print ("siteFile: %s" % siteFile)
print ("bamfile: %s" % bamfile1)
print ("W: %d" % W)

```

```

#load the sites
sites = pp.getPeakSitesFromStrandedBed(siteFile)
#first thing...check that the sites match the notation of the bam file
nMatch = pp.checkSiteNotation(sites, bamfile1)
print("number of sites matching bam chroms: %d" % nMatch)

#save results in a folder
if not os.path.exists(outFolder):
    os.makedirs(outFolder)

#save some batch information
with open(os.path.join(outFolder, "batch_info.txt"), "w") as myfile:
    myfile.write("outfolder: %s\n" % outFolder)
    myfile.write("siteFile: %s\n" % siteFile)
    myfile.write("bamfile: %s\n" % bamfile1)
    myfile.write("W: %d\n" % W)
    myfile.write("#matching sites: %d\n" % nMatch)

#partial function that allows multiple arguments to be passed to map
getPPhelper = partial(pp.getPeakProfiles, bamfile = bamfile1, halfwinwidth=W)

#pp.getPeakProfiles(sites[:100],bamfile1, W, hasChrPrefix=False)
#getPPhelper(sites[:100])

#multiprocessing
# Make the Pool of workers
#pool = Pool(processes=4)

b = time.time()
print (b)
#results = pool.map(getPPhelper, pp.chunks(sites, 1000))
#results = pool.map(getPPhelper, pp.chunks(sites[:100], 10))
results = pp.getPeakProfiles(sites[:100], bamfile = bamfile1, halfwinwidth=W)
#results = getPPhelper(sites[:100])
peakProfs = np.concatenate(results)
a = time.time()
print (a - b)

#close the pool and wait for the work to finish (necesary?)
#pool.close()
#pool.join()

#or maybe use the mean
prof = np.sum(peakProfs, 0)
#the binned image
smallPeaks = pp.binPeakProfiles(peakProfs, K=100)

np.save(os.path.join(outFolder, "peakProfiles.npy"), peakProfs)
np.save(os.path.join(outFolder, "summedPP.npy"), prof)
np.save(os.path.join(outFolder, "binnedPP.npy"), smallPeaks)

```



```

==> ./colocalization/makeColocPlots.py <==
import peakProfiles as pp
import numpy as np
import os
import sys

reload(pp)

resFolder = "hpneMcSites_hpneAtac"
resFolder = 'hpne_mc_100_hpneAtac'
resFolder = 'jd_mc_100_jdAtac'
resFolder = sys.argv[1]

#peakProfs = np.load(os.path.join(resFolder, "peakProfiles.npy"))
prof = np.load(os.path.join(resFolder, "summedPP.npy"))
smallPeaks = np.load(os.path.join(resFolder, "binnedPP.npy"))

pp.savePeakPlots(os.path.join(resFolder, "colocPlot.png"), prof, smallPeaks)
pp.savePeakPlots_part(os.path.join(resFolder, "colocPlot_20.png"), prof,
smallPeaks, throwPortion = .20)
pp.savePeakPlots_part(os.path.join(resFolder, "colocPlot_50.png"), prof,
smallPeaks, throwPortion = .50)

```

```

==> ./colocalization/commands2_fixed2Sets.sh <==
#####
#prepare the files for correlation with atac-seq

```

```

cat jd_mc_100.txt | cut -f1,2 | sed 's/*&\t+/' >| jd_mc_100.bed
cat jd_mc_lt50.txt | cut -f1,2 | sed 's/*&\t+/' >| jd_mc_lt50.bed
cat jd_mc_gt50.txt | cut -f1,2 | sed 's/*&\t+/' >| jd_mc_gt50.bed
cat jd_hmc_p05.txt | cut -f1,2 | sed 's/*&\t+/' >| jd_hmc_p05.bed

```

```

cat hpne_mc_100.txt | cut -f1,2 | sed 's/*&\t+/' >| hpne_mc_100.bed
cat hpne_mc_lt50.txt | cut -f1,2 | sed 's/*&\t+/' >| hpne_mc_lt50.bed
cat hpne_mc_gt50.txt | cut -f1,2 | sed 's/*&\t+/' >| hpne_mc_gt50.bed
cat hpne_hmc_p05.txt | cut -f1,2 | sed 's/*&\t+/' >| hpne_hmc_p05.bed

```

```

qsub runPeakProfiles.sh jd_mc_100_jdAtac jd_mc_100.bed
/home/kpradha1/projects/sanchari/j455_j515/jd_sorted_mdup_merged.bam 3000
qsub runPeakProfiles.sh jd_mc_lt50_jdAtac jd_mc_lt50.bed
/home/kpradha1/projects/sanchari/j455_j515/jd_sorted_mdup_merged.bam 3000
qsub runPeakProfiles.sh jd_mc_gt50_jdAtac jd_mc_gt50.bed
/home/kpradha1/projects/sanchari/j455_j515/jd_sorted_mdup_merged.bam 3000
qsub runPeakProfiles.sh jd_hmc_p05_jdAtac jd_hmc_p05.bed
/home/kpradha1/projects/sanchari/j455_j515/jd_sorted_mdup_merged.bam 3000

```

```

qsub runPeakProfiles.sh hpne_mc_100_hpneAtac hpne_mc_100.bed
/home/kpradha1/projects/sanchari/j455/hpne_sorted_mdup.bam 3000
qsub runPeakProfiles.sh hpne_mc_lt50_hpneAtac hpne_mc_lt50.bed
/home/kpradha1/projects/sanchari/j455/hpne_sorted_mdup.bam 3000
qsub runPeakProfiles.sh hpne_mc_gt50_hpneAtac hpne_mc_gt50.bed
/home/kpradha1/projects/sanchari/j455/hpne_sorted_mdup.bam 3000

```

```
qsub runPeakProfiles.sh hpne_hmc_p05_hpneAtac hpne_hmc_p05.bed
/home/kpradha1/projects/sanchari/j455/hpne_sorted_mdup.bam 3000
```

```
python makeColocPlots.py jd_mc_100_jdAtac
python makeColocPlots.py jd_mc_lt50_jdAtac
python makeColocPlots.py jd_mc_gt50_jdAtac
python makeColocPlots.py jd_hmc_p05_jdAtac
python makeColocPlots.py hpne_mc_100_hpneAtac
python makeColocPlots.py hpne_mc_lt50_hpneAtac
python makeColocPlots.py hpne_mc_gt50_hpneAtac
python makeColocPlots.py hpne_hmc_p05_hpneAtac
```

```
#####
#now prepare the files for RNA correlation
```

```
#prepare the stranded position info
BAMJD=/home/kpradha1/projects/sanchari/rnaseq/JRN.AD0C99ABXX.lane_8_P0_I2.hg19.gsnap-rna-alignment.bam
BAMHPNE=/home/kpradha1/projects/sanchari/rnaseq/HPNE.AC1FL7ACXX.lane_1_P0_I5.hg19.gsnap-rna-alignment.bam
```

```
qsub runPeakProfiles.sh jd_mc_100_jdRna jd_mc_100.bed $BAMJD 3000
qsub runPeakProfiles.sh jd_mc_lt50_jdRna jd_mc_lt50.bed $BAMJD 3000
qsub runPeakProfiles.sh jd_mc_gt50_jdRna jd_mc_gt50.bed $BAMJD 3000
qsub runPeakProfiles.sh jd_hmc_p05_jdRna jd_hmc_p05.bed $BAMJD 3000
```

```
qsub runPeakProfiles.sh hpne_mc_100_hpneRna hpne_mc_100.bed $BAMHPNE 3000
qsub runPeakProfiles.sh hpne_mc_lt50_hpneRna hpne_mc_lt50.bed $BAMHPNE 3000
qsub runPeakProfiles.sh hpne_mc_gt50_hpneRna hpne_mc_gt50.bed $BAMHPNE 3000
qsub runPeakProfiles.sh hpne_hmc_p05_hpneRna hpne_hmc_p05.bed $BAMHPNE 3000
```

```
python makeColocPlots.py jd_mc_100_jdRna
python makeColocPlots.py jd_mc_lt50_jdRna
python makeColocPlots.py jd_mc_gt50_jdRna
python makeColocPlots.py jd_hmc_p05_jdRna
python makeColocPlots.py hpne_mc_100_hpneRna
python makeColocPlots.py hpne_mc_lt50_hpneRna
python makeColocPlots.py hpne_mc_gt50_hpneRna
python makeColocPlots.py hpne_hmc_p05_hpneRna
```

```
##copy all the coloc.plots and rename them to a separate folder
mkdir pics2
mkdir pics3
ls hpne_{,h}mc_*/*.png jd_{,h}mc_*/*.png | sed 's/\(.*\)\/colocPlot\(.*\.png\)\/cp &
pics3\/\1\2/'
```

#look at JUST the profile and use full MC set, (not 400k max)

```
qsub runPeakProfiles_noHeatmap.sh jd_mc_lt50_jdRna jd_mc_lt50.bed $BAMJD 3000
qsub runPeakProfiles_noHeatmap.sh jd_mc_gt50_jdRna jd_mc_gt50.bed $BAMJD 3000
```

```
qsub runPeakProfiles_noHeatmap.sh hpne_mc_lt50_hpneRna hpne_mc_lt50.bed $BAMHPNE
3000
```

```
qsub runPeakProfiles_noHeatmap.sh hpne_mc_gt50_hpneRna hpne_mc_gt50.bed $BAMHPNE
3000
```

#####

#correlation with stat32

#have to strip off the "chr" from the positions

```
cat jd_hmc_p05.bed | sed 's/^chr//' >| jd_hmc_p05_s3.bed
```

```
cat jd_mc_gt50.bed | sed 's/^chr//' >| jd_mc_gt50_s3.bed
```

```
cat hpne_hmc_p05.bed | sed 's/^chr//' >| hpne_hmc_p05_s3.bed
```

```
cat hpne_mc_gt50.bed | sed 's/^chr//' >| hpne_mc_gt50_s3.bed
```

```
qsub runPeakProfiles.sh jd_mc_gt50_jdStat3 jd_mc_gt50_s3.bed
/home/kpradha1/projects/sanchari/stat3Bams/jd13d-stat3.bam 3000
```

```
qsub runPeakProfiles.sh jd_hmc_p05_jdStat3 jd_hmc_p05_s3.bed
/home/kpradha1/projects/sanchari/stat3Bams/jd13d-stat3.bam 3000
```

```
qsub runPeakProfiles.sh hpne_mc_gt50_hpneStat3 hpne_mc_gt50_s3.bed
/home/kpradha1/projects/sanchari/stat3Bams/hpne-stat3.bam 3000
```

```
qsub runPeakProfiles.sh hpne_hmc_p05_hpneStat3 hpne_hmc_p05_s3.bed
/home/kpradha1/projects/sanchari/stat3Bams/hpne-stat3.bam 3000
```

```
qsub runPeakProfiles_noHeatmap.sh jd_mc_gt50_jdStat3 jd_mc_gt50_s3.bed
/home/kpradha1/projects/sanchari/stat3Bams/jd13d-stat3.bam 3000
```

```
qsub runPeakProfiles_noHeatmap.sh jd_hmc_p05_jdStat3 jd_hmc_p05_s3.bed
/home/kpradha1/projects/sanchari/stat3Bams/jd13d-stat3.bam 3000
```

```
qsub runPeakProfiles_noHeatmap.sh hpne_mc_gt50_hpneStat3 hpne_mc_gt50_s3.bed
/home/kpradha1/projects/sanchari/stat3Bams/hpne-stat3.bam 3000
```

```
qsub runPeakProfiles_noHeatmap.sh hpne_hmc_p05_hpneStat3 hpne_hmc_p05_s3.bed
/home/kpradha1/projects/sanchari/stat3Bams/hpne-stat3.bam 3000
```

```
python makeColocPlots.py jd_mc_gt50_jdStat3
```

```
python makeColocPlots.py jd_hmc_p05_jdStat3
```

```
python makeColocPlots.py hpne_mc_gt50_hpneStat3
```

```
python makeColocPlots.py hpne_hmc_p05_hpneStat3
```

#####3

####scratch

```

#oxbs hmc sites, atac seq reads
#####33

#prep oxbs sites
cat hmc_sig0.01_commonSites1_jd.bed | cut -f1,2 | sed 's/.*/&t+/' >| jd_hmc.txt
cat hmc_sig0.01_commonSites1_hpne.bed | cut -f1,2 | sed 's/.*/&t+/' >|
hpne_hmc.txt

qsub runPeakProfiles.sh hpneHmcSites_hpneAtac hpne_hmc.txt
/home/kpradha1/projects/sanchari/j455/hpne_sorted_mdup.bam 3000
qsub runPeakProfiles.sh jdHmcSites_jdAtac jd_hmc.txt
/home/kpradha1/projects/sanchari/j455_j515/jd_sorted_mdup_merged.bam 3000

#oxbs mc sites, atac seq reads
#####33

#prep mc files
cat mc_commonSites1_jd.bed | cut -f1,2 | sed 's/.*/&t+/' >| jd_mc.txt
cat mc_commonSites1_hpne.bed | cut -f1,2 | sed 's/.*/&t+/' >| hpne_mc.txt

qsub runPeakProfiles.sh hpneMcSites_hpneAtac_400k hpne_mc.txt
/home/kpradha1/projects/sanchari/j455/hpne_sorted_mdup.bam 3000
qsub runPeakProfiles.sh jdMcSites_jdAtac_400k jd_mc.txt
/home/kpradha1/projects/sanchari/j455_j515/jd_sorted_mdup_merged.bam 3000

#mc files with rna
#####
#run annotation to get strand info

#stat3 sites, atac seq reads
#####33

#prepare the stat3 peaks from bed files

cat jd13d_stat3_summits.bed | cut -f1,2 | sed 's/.*/&t+/' | grep -v "hs37d5" | sed
's/.*/chr&/' >| jd_stat3.txt
cat hpne_stat3_summits.bed | cut -f1,2 | sed 's/.*/&t+/' | grep -v "hs37d5" | sed
's/.*/chr&/' >| hpne_stat3.txt

qsub runPeakProfiles.sh hpneStat3Sites_hpneAtac hpne_stat3.txt
/home/kpradha1/projects/sanchari/j455/hpne_sorted_mdup.bam 3000
qsub runPeakProfiles.sh jdStat3Sites_jdAtac jd_stat3.txt
/home/kpradha1/projects/sanchari/j455_j515/jd_sorted_mdup_merged.bam 3000

#prepare stranded stat3 files with rna
#add chr to the front of each row
cat jd_stat3_summits_stranded.txt | sed 's/.*/chr&/' >
jd_stat3_summits_stranded1.txt

```

```
cat hpne_stat3_summits_stranded.txt | sed 's/./chr&/' >
hpne_stat3_summits_stranded1.txt
```

```
qsub runPeakProfiles.sh jdstat3Peaks_jdRna jd_stat3_summits_stranded1.txt
/home/kpradha1/projects/sanchari/rnaseq/JRN.AD0C99ABXX.lane_8_P0_I2.hg19.gsnap-rna-
alignment.bam 3000
qsub runPeakProfiles.sh hpnestat3Peaks_hpneRna hpne_stat3_summits_stranded1.txt
/home/kpradha1/projects/sanchari/rnaseq/HPNE.AC1FL7ACXX.lane_1_P0_I5.hg19.gsnap-
rna-alignment.bam 3000
```

```
#move all the pics to a separate folder
ls */colocPlot.png | sed 's$\(.*\)\/\(.*)$cp & pics1\/\1.png$' | bash
```

```
#####
```

```
bamfile1="/home/kpradhan/Desktop/data/sanchari/pancreatic/rnaseq/bam/HPNE.AC1FL7ACX
X.lane_1_P0_I5.hg19.gsnap-rna-alignment.bam"
```

```
samtools view -b $bamfile1 chr1:561524-567524 | samtools mpileup -
```

```
samtools mpileup $bamfile1 -r chr1:561524-567524 | cut -f1-5
```

```
#run from my comp
python makeColocPlots.py test2
```

```
==> ./colocalization/runPeakProfiles.sh <==
#!/bin/bash
#$ -cwd
#$ -j n
#$ -l h_vmem=47G
#$ -pe smp 1
#$ -S /bin/bash
#$ -m e
#usage:
#qsub runPeakProfiles.sh asdlk asdf1ka
#probably going to need more memory
module load scipy/0.14.0/python.2.7.8-atlas-3.11.30
module load python/2.7.8/gcc.4.4.7
module load HTSeq/0.6.1/python.2.7.8
module load numpy/1.9.0/python.2.7.8-atlas-3.11.30
module load matplotlib/1.4.3/python.2.7.8
```

```
outputFolder="test3"
#siteFile="hpneHmc_strandedPeakSummits.txt"
siteFile="hpne_atac.txt"
#bamFile="/home/kpradha1/projects/sanchari/rnaseq/HPNE.AC1FL7ACXX.lane_1_P0_I5.hg19
.gsnap-rna-alignment.bam"
bamFile="/home/kpradhan/Desktop/hpc_home/projects/sanchari/rnaseq/HPNE.AC1FL7ACXX.l
ane_1_P0_I5.hg19.gsnap-rna-alignment.bam"
W="3000"
```

```

outputFolder=$1
siteFile=$2
bamFile=$3
W=$4

echo $outputFolder
echo $siteFile
echo $bamFile
echo $W

#make a folder for storing intermediate result
#otherwise, might run out of space on default /tmp
python getPeakProfiles_preload.py $outputFolder $siteFile $bamFile $W

#add a $ after the # if want email notification at job completion
# -M kith.pradhan@einstein.yu.edu

==> ./colocalization/viewPeakSums_oxbs.py <==
import numpy as np
import matplotlib.pyplot as plt
import random
import scipy.stats

ls

fols = [
    "jd_mc_lt50_jdAtac",
    "jd_mc_gt50_jdAtac",
    "hpne_mc_lt50_hpneAtac",
    "hpne_mc_gt50_hpneAtac",
    "jd_mc_lt50_jdRna",
    "jd_mc_gt50_jdRna",
    "hpne_mc_lt50_hpneRna",
    "hpne_mc_gt50_hpneRna"
]

f = fols[0]
f

for f in fols:
    plt.close()
    outFile = "pics4/peakSums_"+f+".png"
    x = np.load(f+"/peakSums.npy")
    plt.plot(np.arange(-3000, 3000, 1), x)
    plt.title(f)
    plt.savefig(outFile)

```

```

#layer the ATAC HMC and MC profiles on top of each other
#normalized by total count

x_mc = np.load("jd_mc_gt50_jdAtac/peakSums.npy")
x_mc = x_mc/np.mean(x_mc)
x_hmc = np.load("jd_hmc_p05_jdAtac/binnedPP.npy")
x_hmc = np.sum(x_hmc, 0)
x_hmc = x_hmc/np.mean(x_hmc)

plt.close()
plt.plot(x_mc/np.mean(x_mc), color="blue", label=">50% mc sites")
plt.plot(x_hmc/np.mean(x_hmc), color="red", label = "0.05 hmc sites")
plt.title("JD: coloc 0xBS, atac-seq")
plt.legend()
plt.savefig("pics4/jd_oxbs_atac.png")

x_mc = np.load("hpne_mc_gt50_hpneAtac/peakSums.npy")
x_mc = x_mc/np.mean(x_mc)
x_hmc = np.load("hpne_hmc_p05_hpneAtac/binnedPP.npy")
x_hmc = np.sum(x_hmc, 0)
x_hmc = x_hmc/np.mean(x_hmc)

plt.close()
plt.plot(x_mc/np.mean(x_mc), color="blue", label=">50% mc sites")
plt.plot(x_hmc/np.mean(x_hmc), color="red", label = "0.05 hmc sites")
plt.title("HPNE: coloc 0xBS, atac-seq")
plt.legend()
plt.savefig("pics4/hpne_oxbs_atac.png")

#develop statistical test that shows whether two profiles have similar peak
#tighter or looser peak
#
#sample from distributions
#Do F test to show variances are different

#treat the profile as a probability density distribution
#sample n values from the distribution
def sampleFromProfile(pos, prof, n=1000):
    #step one, construct prob dist
    csum = np.cumsum(prof)
    #normalize so last element is prob 1.0
    prob = csum/csum[-1]
    #randomly sample 1000 from uniform dist
    ix = [min(np.where(prob > random.random())[0]) for i in np.arange(n)]
    samps = pos[ix]
    return samps

def kurtosisPerm(samps_mc, samps_hmc, K=10000):
    #get stat for difference in kurtosis
    kmc = scipy.stats.kurtosis(samps_mc)
    khmc = scipy.stats.kurtosis(samps_hmc)
    kstat = khmc - kmc
    #
    #combine the samples

```

```

both = np.array([samps_mc, samps_hmc]).ravel()
res = []
for i in range(K):
    if i % 100 == 0:
        print i
        #shuffle the samples
        np.random.shuffle(both)
        #compute kurtosis on the two halves of the array
        k1 = scipy.stats.kurtosis(both[:len(samps_mc)])
        k2 = scipy.stats.kurtosis(both[len(samps_hmc):])
        #save the stat of difference of kurtosis
        res.append(k2-k1)
#
res = np.array(res)
hits = np.sum(abs(kstat ) < np.abs(res))
pval = hits / res.shape[0]
plt.figure()
plt.hist(res, 100)
plt.axvline(x=kstat, color="red")
plt.xlabel("Null Distribution (K=%d)"%K)
return [kmc, khmc, pval]

```

```

mcFile = "jd_mc_gt50_jdAtac/peakSums.npy"
hmcFile = "jd_hmc_p05_jdAtac/binnedPP.npy"

```

```

#is the hmc profile tighter than mc?
def testTightness(mcFile, hmcFile):
    #prep the profiles, divide by mean so they on same scale
    x_mc = np.load(mcFile)
    x_mc_sum = np.sum(x_mc)
    x_mc = x_mc/np.mean(x_mc)
    x_hmc = np.load(hmcFile)
    #hmc file is the binned collection, not the sum profile
    x_hmc_sum = np.sum(x_hmc)
    x_hmc = np.sum(x_hmc, 0)
    x_hmc = x_hmc/np.mean(x_hmc)
    #get the samples
    pos = np.arange(-3000,3000,1)
    samps_mc = sampleFromProfile(pos, x_mc, 10000)
    samps_hmc = sampleFromProfile(pos, x_hmc, 10000)
    #plot the figures to make sure data makes sense
    #the original read sum profile
    plt.figure()
    plt.plot(pos, x_mc, label="mc", color="red")
    ax = plt.plot(pos, x_hmc, label="hmc", color="blue")
    plt.ylim(ymin = 0)
    plt.legend()
#
#histogram of the sampled read sum profile
plt.figure()
plt.hist(samps_mc, 100, alpha=0.5, label="mc")
plt.hist(samps_hmc, 100, alpha=0.5, label="hmc")
plt.legend()
#
#kurtosis test
return kurtosisPerm(samps_mc, samps_hmc)
#

```



```

#variance test
#mc_var = np.var(samps_mc)
#hmc_var = np.var(samps_hmc)
##perform the levene's test on variance to see which
##has less (tighter), and which has more (looser)
#res = scipy.stats.levene(samps_hmc, samps_mc)
#return [mc_var, hmc_var, res.pvalue]

```

```

jd_tight = testTightness("jd_mc_gt50_jdAtac/peakSums.npy",
"jd_hmc_p05_jdAtac/binnedPP.npy")
hpne_tight = testTightness("hpne_mc_gt50_hpneAtac/peakSums.npy",
"hpne_hmc_p05_hpneAtac/binnedPP.npy")

```

```

jd_tight
hpne_tight

```

```

kmc = scipy.stats.kurtosis(samps_mc)
khmc = scipy.stats.kurtosis(samps_hmc)
abs(kmc ) - abs(khmc)

```

```

both = np.array([samps_mc, samps_hmc]).ravel()
res = []
for i in range(10000):
    if i % 100 == 0:
        print i
        np.random.shuffle(both)
        k1 = scipy.stats.kurtosis(both[:10000])
        k2 = scipy.stats.kurtosis(both[10000:])
        res.append(abs(k1 ) - abs(k2))

```

```

plt.hist(res, 100)

```

```

#F = min(np.var(samps_hmc) / np.var(samps_mc), np.var(samps_mc) / np.var(samps_hmc)
)
#2*scipy.stats.f.cdf(F, len(samps_mc)-1, len(samps_hmc)-1)
#p_value = scipy.stats.f.cdf(F, len(samps_mc)-1, len(samps_hmc)-1)

```

```

==> ./colocalization/getPeakProfiles_setImpl.py <==
#from multiprocessing import Pool
from functools import partial
from itertools import chain
import time
import peakProfiles as pp
import numpy as np
import matplotlib.pyplot as plt
import os
import sys
import HTSeq as ht

```

```

#$reload(pp)

outFolder = "test4"
#siteFile = "hpneHmc_strandedPeakSummits.txt"
siteFile = "hpne_atac.txt"
#bamfile1 =
"/home/kpradha1/projects/sanchari/rnaseq/HPNE.AC1FL7ACXX.lane_1_P0_I5.hg19.gsnap-
rna-alignment.bam"
bamfile1 =
"/home/kpradhan/Desktop/hpc_home/projects/sanchari/rnaseq/HPNE.AC1FL7ACXX.lane_1_P0
_I5.hg19.gsnap-rna-alignment.bam"
W          = 3000

#command line arguments
outFolder = sys.argv[1]
siteFile = sys.argv[2]
bamfile1 = sys.argv[3]
W          = int(sys.argv[4])

print ("outfolder: %s" % outFolder)
print ("siteFile: %s" % siteFile)
print ("bamfile: %s" % bamfile1)
print ("W: %d" % W)

#load the sites
sites = pp.getPeakSitesFromStrandedBed(siteFile)
#first thing...check that the sites match the notation of the bam file
nMatch = pp.checkSiteNotation(sites, bamfile1)
print("number of sites matching bam chroms: %d" % nMatch)

#create a genomic array of sets to hold the site info
gas = ht.GenomicArrayOfSets("auto", stranded=True)
?ht.GenomicInterval()

def site2GI(site):
    return ht.GenomicInterval(""+site[0], site[2]-W, site[2]+W, ""+site[1])

#fill the array of sets
for i, site in enumerate(sites[:10]):
    iv = site2GI(site)
    gas[iv] += str(i)

for g in gas.steps():
    print g

gas['1']

for iv, val in gas[ iv1 ].steps():
    print iv, val

site = sites[1]
iv1 = ht.GenomicInterval(""+site[0], site[2]-W, site[2]+W, ""+site[1])

#get regions spanned by site 1

```

site-W,

#read the bam file read by read filling in genomic array of sets

#look at coverages of sites

==> ./sanchari/rnaseq/commands\_ngs.sh <==

#tss, tes, genebody, exon, cgi, enhancer, dhs

jdbam=JRN.AD0C99ABXX.lane\_8\_P0\_I2.hg19.gsnap-rna-alignment.bam

hpnebam=HPNE.AC1FL7ACXX.lane\_1\_P0\_I5.hg19.gsnap-rna-alignment.bam

#ngs.plot.r -P 4 -G hg19 -R genebody -C \$jdbam -O jdplot\_genebody -T jdRna -L 5000

#ngs.plot.r -P 4 -G hg19 -R genebody -C \$hpnebam -O hpneplot\_genebody -T hpneRna -L 5000

#

ngs.plot.r -P 4 -G hg19 -R tss -C \$jdbam -O jdplot\_rna\_tss -T jdRna -L 5000

ngs.plot.r -P 4 -G hg19 -R tes -C \$jdbam -O jdplot\_rna\_tes -T jdRna -L 5000

ngs.plot.r -P 4 -G hg19 -R exon -C \$jdbam -O jdplot\_rna\_exon -T jdRna -L 5000

ngs.plot.r -P 4 -G hg19 -R cgi -C \$jdbam -O jdplot\_rna\_cgi -T jdRna -L 5000

#

ngs.plot.r -P 4 -G hg19 -R tss -C \$hpnebam -O hpneplot\_rna\_tss -T hpneRna -L 5000

ngs.plot.r -P 4 -G hg19 -R tes -C \$hpnebam -O hpneplot\_rna\_tes -T hpneRna -L 5000

ngs.plot.r -P 4 -G hg19 -R exon -C \$hpnebam -O hpneplot\_rna\_exon -T hpneRna -L 5000

ngs.plot.r -P 4 -G hg19 -R cgi -C \$hpnebam -O hpneplot\_rna\_cgi -T hpneRna -L 5000

##run these two again

#ngs.plot.r -P 4 -G hg19 -R enhancer -C \$jdbam -O jdplot\_enhancer -T jdAtac -L 5000

#ngs.plot.r -P 4 -G hg19 -R dhs -C \$jdbam -O jdplot\_dhs -T jdAtac -L 5000

#ngs.plot.r -P 4 -G hg19 -R enhancer -C \$hpnebam -O hpneplot\_enhancer -T hpneAtac -L 5000

#ngs.plot.r -P 4 -G hg19 -R dhs -C \$hpnebam -O hpneplot\_dhs -T hpneAtac -L 5000

==> ./sanchari/atac\_hmc\_rna/annotatePeaks.r <==

library("ChIPpeakAnno")

#source("https://bioconductor.org/biocLite.R")

#biocLite("EnsDb.Hsapiens.v75")

library(EnsDb.Hsapiens.v75)

options(stringsAsFactors=F)

```

#load in all the gene info from hg19
knownGenes <- genes(EnsDb.Hsapiens.v75)

#peaksFile must be the peak summit file from macs2
peaksFile = "hpne_stat3_summits.bed"
addStrandToPeaks <- function(peaksFile, newFile){
  #read in summits and convert to ranges
  peaks = read.table(peaksFile)
  #if the 3rd column is not the peak ends
  if (is.na(as.numeric(peaks[1,3]))){
    #use the peaks starts + 1
    ends = peaks[,2] + 1
  }else{
    ends = peaks[,3]
  }
  rd <- RangedData(IRanges(start = peaks[,2],
    end = ends), space = peaks[,1])
  ranges.peaks = toGRanges(rd, format="RangedData")

  #annotate ranges with the knownGenes database
  anno <- annotatePeakInBatch(ranges.peaks, AnnotationData=knownGenes)

  #make sure to only take 1 result
  x = anno[!(duplicated(anno$peak))]
  #append the strand info to last column
  y = cbind(peaks, strand=as.character(x$feature_strand))
  y$strand = as.character(x$feature_strand)
  y$strand[is.na(y$strand)] = "*"
  #write the new stranded peak file
  write.table(newFile, x=y, col.names=F, row.names=F, quote=F, sep="\t")
}

#stat3
addStrandToPeaks("test1_jdmc_top100k.txt", "test1_jdmc_top100k_stranded.txt")
addStrandToPeaks("test1_jdhmc.txt", "test1_jdhmc_stranded.txt")

addStrandToPeaks("hpne_stat3_summits.bed", "hpne_stat3_summits_stranded.txt")
addStrandToPeaks("jd13d_stat3_summits.bed", "jd_stat3_summits_stranded.txt")

peaksFile = "peaks.atac.jd.gain.1k.txt"
addStrandToPeaks("peaks.atac.jd.gain.1k.txt", "peaks.atac.jd.gain.1k_stranded.txt")
addStrandToPeaks("peaks.atac.jd.loss.1k.txt", "peaks.atac.jd.loss.1k_stranded.txt")

addStrandToPeaks("/home/kpradhan/Desktop/hpc_home/projects/sanchari/j455_j515/macsc_
Chpne_sorted_mdup_Tjd_sorted_mdup_merged/Chpne_sorted_mdup_Tjd_sorted_mdup_merged_s
ummits.bed", "jd-hpne_strandedPeakSummits.txt")
addStrandToPeaks("/home/kpradhan/Desktop/hpc_home/projects/sanchari/j455_j515/macsc_
Cjd_sorted_mdup_merged_Thpne_sorted_mdup/Cjd_sorted_mdup_merged_Thpne_sorted_mdup_s
ummits.bed", "hpne-jd_strandedPeakSummits.txt")

addStrandToPeaks("p3.txt", "p3_stranded.txt")

```

```

addStrandToPeaks("hmc_sig0.001_commonSites1_hpne.bed",
"hpneHmc_strandedPeakSummits_0.001.txt")
addStrandToPeaks("hmc_sig0.001_commonSites1_jd.bed",
"jdHmc_strandedPeakSummits_0.001.txt")

addStrandToPeaks("hmc_sig0.01_commonSites1_hpne.bed",
"hpneHmc_strandedPeakSummits.txt")
addStrandToPeaks("hmc_sig0.01_commonSites1_jd.bed",
"jdHmc_strandedPeakSummits.txt")

addStrandToPeaks("/home/kpradhan/Desktop/hpc_home/projects/sanchari/j455/macs_hpne_
sorted_mdup/hpne_sorted_mdup_summits.bed", "hpne_strandedPeakSummits.txt")
addStrandToPeaks("/home/kpradhan/Desktop/hpc_home/projects/sanchari/j455_j515/macs_
jd_sorted_mdup_merged/jd_sorted_mdup_merged_summits.bed",
"jd_strandedPeakSummits.txt")

addStrandToPeaks("/home/kpradhan/mnt/hpc_home/projects/colocalization/jd_hmc.txt",
"jd_strandedHmc.txt")
addStrandToPeaks("/home/kpradhan/mnt/hpc_home/projects/colocalization/hpne_hmc.txt"
, "hpne_strandedHmc.txt")

#####33
#scratch

rd <- RangedData(IRanges(start = peaks.hpne[,2],
end = peaks.hpne[,3]), space = peaks.hpne[,1])
ranges.hpne = toGRanges(rd, format="RangedData")

anno.hpne <- annotatePeakInBatch(ranges.hpne, AnnotationData=knownGenes)

x = anno.hpne[!(duplicated(anno.hpne$peak))]
#write the peaks with strand info
x$feature_strand
slot(strand(x), "values")
str(ranges(x))
y = cbind(peaks.hpne, strand=as.character(x$feature_strand))
y$strand = as.character(y$strand)
class(y$strand)
sum(is.na(y$strand))
y$strand[is.na(y$strand)] = "*"

write.table("peaks_test1.bed", x=y, col.names=F, row.names=F, quote=F, sep="\t")

head(y)

start(ranges(x))
end(ranges(x))
head(x)

```

```
str(x)
names(x)
x$ranges
x["ranges"]
ranges(x)
dim(peaks.hpne)
```

```
hmc_sig0.01_commonSites1_hpne.bed
```

```
hmc.hpne = read.table("hmc_sig0.01_commonSites1_hpne.bed")
```

```
peaks.hpne =
read.table("/home/kpradhan/Desktop/hpc_home/projects/sanchari/j455/macs_hpne_sorted
_mdup/hpne_sorted_mdup_summits.bed")
peaks.hpne =
read.table("/home/kpradhan/Desktop/hpc_home/projects/sanchari/j455/macs_hpne_sorted
_mdup/hpne_sorted_mdup_peaks.xls", header=T)
head(peaks.hpne)
```

```
peaks.jd =
read.table("/home/kpradhan/Desktop/hpc_home/projects/sanchari/j455_j515/macs_jd_sor
ted_mdup_merged/jd_sorted_mdup_merged_summits.bed")
```

```
peaks.jdMinushpne =
read.table("/home/kpradhan/Desktop/hpc_home/projects/sanchari/j455_j515/macs_Chpne_
sorted_mdup_Tjd_sorted_mdup_merged/Chpne_sorted_mdup_Tjd_sorted_mdup_merged_summits
.bed")
peaks.hpneMinusjd =
read.table("/home/kpradhan/Desktop/hpc_home/projects/sanchari/j455_j515/macs_Cjd_so
rted_mdup_merged_Thpne_sorted_mdup/Cjd_sorted_mdup_merged_Thpne_sorted_mdup_summits
.bed")
```

```
==> ./sanchari/atac_hmc_rna/overlays/plotOverlays.r <==
```

```
#1. jd atac hmc profile
#   overlaid with
#   jd atac no hmc profile
#
#
#2. hpne atac hmc profile
#   overlaid with
#   hpne atac no hmc profile
#
```

```
#plot(regcovMat, type='l', xaxt="n")
#axis(side=1, at=xticks$pos, labels = xticks$lab)
```

```
#load in the jd peak sets
```

```
load("jd_strandedAtacPeaks_hmc/avgprof.RData")
jd.hmc.regcovMat = regcovMat
jd.hmc.xticks = xticks
```

```
load("jd_strandedAtacPeaks_nohmc/avgprof.RData")
```

```

jd.nohmc.regcovMat = regcovMat
jd.nohmc.xticks = xticks

png("jd_atac_rna_hmc.png")
plot(jd.hmc.regcovMat, type='l', xaxt="n", xlab="Genomic Region (5' -> 3')",
ylab="Read count Per Million mapped reads", col="blue", lwd=3)
lines(jd.nohmc.regcovMat, type='l', xaxt="n", col="red", lw=3)
axis(side=1, at=jd.hmc.xticks$pos+1, labels = jd.hmc.xticks$lab)
abline(v=floor(pts/2)+1, col=rgb(.5, .5, .5))
legend("topleft", c("jd.hmc.atac.rna", "jd.nohmc.atac.rna"), col=c("blue", "red"),
pch=16)
dev.off()

load("hpne_strandedAtacPeaks_hmc/avgprof.RData")
hpne.hmc.regcovMat = regcovMat
hpne.hmc.xticks = xticks

load("hpne_strandedAtacPeaks_nohmc/avgprof.RData")
hpne.nohmc.regcovMat = regcovMat
hpne.nohmc.xticks = xticks

png("hpne_atac_rna_hmc.png")
plot(hpne.hmc.regcovMat, type='l', xaxt="n", xlab="Genomic Region (5' -> 3')",
ylab="Read count Per Million mapped reads", col="blue", lwd=3)
lines(hpne.nohmc.regcovMat, type='l', xaxt="n", col="red", lw=3)
axis(side=1, at=hpne.hmc.xticks$pos+1, labels = hpne.hmc.xticks$lab)
abline(v=floor(pts/2)+1, col=rgb(.5, .5, .5))
legend("topleft", c("hpne.hmc.atac.rna", "hpne.nohmc.atac.rna"), col=c("blue",
"red"), pch=16)
dev.off()

==> ./sanchari/atac_hmc_rna/examineSites.r <==
options(stringsAsFactors=F)

#look at the atac-seq sites
#   separate into 2 sets, those that have hmc sites within
#   those that don't
#   maybe break into sets based on the percentage of hmc sites

#compare these two site sites to rna expression
#ngs.plot

#will need to add strand info

#load in the atac seq peaks
atac.jd = read.table("jd_strandedAtacPeakSummits.txt")
atac.hpne = read.table("hpne_strandedAtacPeakSummits.txt")
head(atac.jd)
head(atac.hpne)

#load in the hmc sites
hmc.jd = read.table("sites_fixed2_jdHmc_p05.txt")

```

```

hmc.hpne = read.table("sites_fixed2_hpneHmc_p05.txt")
head(hmc.jd)
head(hmc.hpne)

#how many sites have hmc sites within them?
x = atac.jd
y = hmc.jd

#work chrom by chrom
w = 3000
unique(x[,1])

#x are the atac peak summits
#y are the hmc sites
#w is the width
#for each atac peak, return the number of hmc sites within w bases
getOverlapPeaks <- function(x, y, w =3000){
  peaks = sapply(1:nrow(x), function(i){
    if (i %% 1000 == 0){
      print (i)
    }
    ix = y[,1] == x[i,1]
    sum((y[ix,2] > x[i,2]-w) & (y[ix,2] < x[i,3]+w))
  })
  peaks
}

hmcPeaks.jd = getOverlapPeaks(atac.jd, hmc.jd, 3000)
hmcPeaks.hpne = getOverlapPeaks(atac.hpne, hmc.hpne, 3000)

write.table(file="jd_strandedAtacPeaks_hmc.txt", x=atac.jd[hmcPeaks.jd > 0,],
row.names=F, col.names=F, quote=F, sep="\t")
write.table(file="jd_strandedAtacPeaks_nohmc.txt", x=atac.jd[hmcPeaks.jd == 0,],
row.names=F, col.names=F, quote=F, sep="\t")
write.table(file="hpne_strandedAtacPeaks_hmc.txt", x=atac.hpne[hmcPeaks.hpne > 0,],
row.names=F, col.names=F, quote=F, sep="\t")
write.table(file="hpne_strandedAtacPeaks_nohmc.txt", x=atac.hpne[hmcPeaks.hpne ==
0,], row.names=F, col.names=F, quote=F, sep="\t")

dim(x)
dim(y)

#separate the atac sites into those with/without hmc sites

==> ./sanchari/atac_hmc_rna/commands1.sh <==

bam1=/home/kpradhan/Desktop/data/sanchari/pancreatic/rnaseq/bam/JRN.AD0C99ABXX.lane
_8_P0_I2.hg19.gsnap-rna-alignment.bam
bam2=/home/kpradhan/Desktop/data/sanchari/pancreatic/rnaseq/bam/HPNE.AC1FL7ACXX.lan
e_1_P0_I5.hg19.gsnap-rna-alignment.bam

#atacseq peaks with strand information
#peak1=jd_strandedAtacPeakSummits.txt
#peak2=hpne_strandedAtacPeakSummits.txt

```



```

#all
#time ngs.plot.r -SS same -G hg19 -R bed -E $peak1 -C $bam1 -O peaks.atac.jd -T
peaks.atac.jd -P 2 -L 3000
#time ngs.plot.r -SS same -G hg19 -R bed -E $peak2 -C $bam2 -O peaks.atac.hpne -T
peaks.atac.hpne -P 2 -L 3000

#separated by hmc
time ngs.plot.r -SS same -G hg19 -R bed -E jd_strandedAtacPeaks_hmc.txt -C $bam1 -O
jd_strandedAtacPeaks_hmc -T peaks.atac.jd.hmc -P 2 -L 3000
time ngs.plot.r -SS same -G hg19 -R bed -E jd_strandedAtacPeaks_nohmc.txt -C $bam1
-O jd_strandedAtacPeaks_nohmc -T peaks.atac.jd.nohmc -P 2 -L 3000
time ngs.plot.r -SS same -G hg19 -R bed -E hpne_strandedAtacPeaks_hmc.txt -C $bam2
-O hpne_strandedAtacPeaks_hmc -T peaks.atac.hpne.hmc -P 2 -L 3000
time ngs.plot.r -SS same -G hg19 -R bed -E hpne_strandedAtacPeaks_nohmc.txt -C
$bam2 -O hpne_strandedAtacPeaks_nohmc -T peaks.atac.hpne.nohmc -P 2 -L 3000

==> ./sanchari/homer_panc/runHomer.sh <==
#!/bin/bash
#$ -cwd
#$ -j n
#$ -l h_vmem=4G
#$ -pe smp 4
#$ -S /bin/bash
#$ -m e
#$ -M kith.pradhan@einstein.yu.edu

#add the path to homer and seqlogo
#PATH=$PATH:/home/kpradha1/programs/homer/bin
PATH=$PATH:/home/kpradha1/programs/weblogo
module load blatSuite/34
module load HOMER/4.7

outname1=$1
peaks1=$2

findMotifsGenome.pl $peaks1 hg19 $outname1 -len 0 -preparedDir
/home/kpradha1/programs/homer_prepare -prepare -p 8

==> ./sanchari/homer_panc/commands1.sh <==

./runHomer.sh test1 atac_hpne_only.bed
qsub ./runHomer.sh test1 atac_hpne_only.bed
qsub ./runHomer.sh test2 atac_hpne_only.bed
qsub ./runHomer.sh test3 atac_hpne_only.bed

==> ./sanchari/filterCpg/calcRunningAve.pl <==
#!/usr/bin/perl

use strict;
use warnings;

my $N = 1;
my $curAve = 0;
while (<STDIN>){

```

```

    my @fields = split '#';
    my ($a, $b) = split ' ', $fields[1];
    #TODO: Can we not look at less than 100 percent methylation.
    #TODO: Like maybe 50 and above?
    $curAve = $curAve + (($a/$b) - $curAve)/$N;
    $N++;
    if ($N % 100000 == 0){
        #print "$a\t$b\t$curAve\t$N\n";
        print STDERR "$curAve\t$N\n";
    }
}

print "$curAve\t$N\n";

==> ./sanchari/filterCpg/commands2_mcPercCpg.sh <==
#get the average methylation percentage
#regular C(not CpG) sites
#CpG sites

#run the bedgraph output through cpg filter
fol=~mnt/hpc_home/projects/sanchari/j432_j446/conversionCounts/
ls $fol

file=${fol}JD_BS_22.txt.gz
echo $file

#separate the C's from CpG's
for file in `ls ${fol}*JD_BS*.gz`
do
    echo $file
    #The CpG sites
    echo "cpg filtering..."
    zcat $file | python ../filterCpg.py | awk '{printf "%s\t%d#%d\t%d\n",
$1,$2,$3,$4}' >| temp_cpg.txt
    #all sites
    zcat $file | awk '{printf "%s\t%d#%d\t%d\n", $1,$2,$3,$4}' >| temp_allC.txt
    #append just the C sites
    echo "writing C's..."
    join -v1 -t"#" <(sort -k1,1 -t"#" temp_allC.txt) <(sort -k1,1 -t"#"
temp_cpg.txt) >> JD_BS_C.txt
    #append the CpG sites
    echo "writing CpG's..."
    cat temp_cpg.txt >> JD_BS_CpG.txt
done

#now compute average methylation between C's and CpG's

cat Cpgfiles/JD_BS_CpG.txt | ./calcRunningAve.pl >| meanCpg.txt
cat Cpgfiles/JD_BS_C.txt | ./calcRunningAve.pl >| meanC.txt

==> ./sanchari/filterCpg/filterCpg.py <==
#!/usr/bin/python
import numpy as np

```

```

from itertools import islice
import os
import sys

faFol = "/home/kpradhan/Desktop/hpc_home/projects/hg19/chroms"
faFol = "/home/kpradha1/projects/hg19/chroms"
posFile =
"/home/kpradhan/Desktop/hpc_home/projects/sanchari/j432_j446/commonSites/common4.txt"
outFile = "test1.txt"

def loadFasta(faFile):
    with open(faFile) as fp:
        fa = ""
        #load the first line which should start with >
        line = fp.readline()
        #print (line)
        fa = "".join([line.rstrip("\n") for line in fp.readlines()])
    return fa

#open the output file
#out = open(outFile, "w")

curChrom = ""
#for line in islice(open(posFile), 1000):
#process chromosomal positions line by line
#for line in open(posFile):
for line in sys.stdin:
    line = line.rstrip("\n")
    #print line
    #first two fields are the chromosome and position
    #chrom, pos = line.split("\t")[0:2]
    chrom, pos = line.split()[0:2] #split on whitespace
    pos = int(filter(str.isalnum, pos)) #convert to integer
    #make sure the proper fastq is loaded
    if (chrom != curChrom):
        #load the entire fastq chrom
        faFile = os.path.join(faFol, chrom+".fa")
        ref = loadFasta(faFile)
        #current
        curChrom = chrom
    #if the current position is a cpg, then print it
    #print ref[pos:(pos+2)]
    b2 = ref[pos:(pos+2)].lower()
    if b2 == "cg":
        #out.write("%s\t%s\n"%(line, b2))
        sys.stdout.write("%s\t%s\n"%(line, b2))

#out.close()

==> ./sanchari/filterCpg/commands1.sh <==
##sort the files first
#sort -k1,1 -k2,2n

```

```

/home/kpradhan/Desktop/hpc_home/projects/sanchari/j432_j446/commonSites/common4.txt
> sorted_common4.txt
#
#sort -k1,1 -k2,2n
/home/kpradhan/Desktop/hpc_home/projects/sanchari/j432_j446/hpc_mcSites/common4_mcS
ites_HPNE.txt > sorted_common4_mcSites_HPNE.txt
#sort -k1,1 -k2,2n
/home/kpradhan/Desktop/hpc_home/projects/sanchari/j432_j446/hpc_mcSites/common4_mcS
ites_JD.txt > sorted_common4_mcSites_JD.txt
#
#sort -k1,1 -k2,2n
/home/kpradhan/Desktop/hpc_home/projects/sanchari/j432_j446/hmcSites/common4_hmcSit
es_HPNE.txt > sorted_common4_hmcSites_HPNE.txt
#sort -k1,1 -k2,2n
/home/kpradhan/Desktop/hpc_home/projects/sanchari/j432_j446/hmcSites/common4_hmcSit
es_JD.txt > sorted_common4_hmcSites_JD.txt

#
#time cat sorted_common4.txt | ./filterCpg.py >| common4cpg.txt
#
#time cat sorted_common4_mcSites_HPNE.txt | ./filterCpg.py >|
common4cpg_mcSites_HPNE.txt
#time cat sorted_common4_mcSites_JD.txt | ./filterCpg.py >|
common4cpg_mcSites_JD.txt
#
#time cat sorted_common4_hmcSites_HPNE.txt | ./filterCpg.py >|
common4cpg_hmcSites_HPNE.txt
#time cat sorted_common4_hmcSites_JD.txt | ./filterCpg.py >|
common4cpg_hmcSites_JD.txt

#get the diff sets
#sites in hpne but no jd

##mc
#comm -23 --check-order <(cut -f1-2 common4cpg_mcSites_JD.txt | sort) <(cut -f1-2
common4cpg_mcSites_HPNE.txt | sort) >| common4cpg_mcSites_JD-HPNE.txt
#comm -13 --check-order <(cut -f1-2 common4cpg_mcSites_JD.txt | sort) <(cut -f1-2
common4cpg_mcSites_HPNE.txt | sort) >| common4cpg_mcSites_HPNE-JD.txt
#
##hmc
#comm -23 --check-order <(cut -f1-2 common4cpg_hmcSites_JD.txt | sort) <(cut -f1-2
common4cpg_hmcSites_HPNE.txt | sort) >| common4cpg_hmcSites_JD-HPNE.txt
#comm -13 --check-order <(cut -f1-2 common4cpg_hmcSites_JD.txt | sort) <(cut -f1-2
common4cpg_hmcSites_HPNE.txt | sort) >| common4cpg_hmcSites_HPNE-JD.txt

#get #c's #cpgs in common for JD
#get #meth's for c's and cpgs

#merge with common, and cpg
mc_sites=/home/kpradhan/mnt/hpc_home/projects/sanchari/j432_j446/hpc_mcSites/mcSite
s_JD_all.txt
common_cpg_sites=sorted_JDcommon4cpg.txt
common_c_sites=/home/kpradhan/mnt/hpc_home/projects/sanchari/j432_j446/commonSites/

```

```

sorted_common4_JD.txt

ls $common_c_sites
ls $common_cpg_sites

head $mc_sites
head $common_c_sites
head $common_cpg_sites

cat $mc_sites | awk '{printf("%s\t%d#%s\n", $1,$2,$0)}' | head

cat $mc_sites | awk '{printf("%s\t%d#%s\n", $1,$2,$0)}' | head

cat $common_cpg_sites | cut -f1-2

cat $mc_sites | awk '{printf("%s\t%d#%s\n", $1,$2,$0)}' | head

#default sort doesn't work properly!
sort -t"#" -k1b,1 mc1.txt > mc2.txt
cat $common_cpg_sites | cut -f1-2 | sort >| cpg1.txt
cat $common_c_sites | cut -f1-2 | sort >| c1.txt

#cpg sites
join mc2.txt cpg1.txt -t'#' >| JdMcSites_JDcommon4Cpg.txt
join mc2.txt c1.txt -t'#' >| JdMcSites_JDcommon4C.txt

wc -l JdMcSites_JDcommon4Cpg.txt
wc -l JdMcSites_JDcommon4C.txt

join mc1.txt <(cat $common_cpg_sites | cut -f1-2 | sort) -t "#" >|
JdMcSites_JDcommon4Cpg.txt

#c sites
join <(cat $mc_sites | awk '{printf("%s\t%d#%s\n", $1,$2,$0)}' | sort -t'#' -k1)
<(cat $common_c_sites | cut -f1-2 | sort) -t "#" >| JdMcSites_JDcommon4C.txt

==> ./sanchari/filterCpg/filterCpg.sh <==
#!/bin/bash
#$ -cwd
#$ -j n
#$ -l h_vmem=4G
#$ -pe smp 1
#$ -S /bin/bash
#$ -m e
#   #$ -M kith.pradhan@einstein.yu.edu
module load python/2.7.8/gcc.4.4.7
module load numpy/1.9.0/python.2.7.8

inFile=$1
outFile=$2

python /home/kpradha1/projects/sanchari/filterCpg/filterCpg.py < $inFile > $outFile

```

```
==> ./sanchari/j455/markDuplicates.sh <==
#!/bin/bash
#$ -cwd
#$ -j n
#$ -l h_vmem=4G
#$ -pe smp 4
#$ -S /bin/bash
#$ -m e
#$ -M kith.pradhan@einstein.yu.edu
module load samtools/1.2/gcc.4.4.7
module load picard-tools/1.92/java.1.8.0_20
```

```
bam=$1
bname="${bam%.*}"
```

```
java -jar $(which BuildBamIndex.jar) INPUT=${bam}
java -jar $(which MarkDuplicates.jar) INPUT=${bam} OUTPUT=${bname}_mdup.bam
METRICS_FILE=${bname}_mdMetric.txt
java -jar $(which BuildBamIndex.jar) INPUT=${bname}_mdup.bam
```

```
==> ./sanchari/j455/se_macs_jd_sorted_mdup/jd_sorted_mdup_model.r <==
```

```
# R script for Peak Model
# -- generated by MACS
```

```
p <-
```

```
c(0.0242523627067,0.0284508514944,0.0325633644024,0.0368478290696,0.0409890006042,0.0416911369543,0.0419347352799,0.0417627835207,0.0417986068039,0.0416409843579,0.0416409843579,0.0415693377916,0.0418917473401,0.0414403739721,0.0413687274058,0.0416911369543,0.0417197955809,0.0418201007738,0.0416768076411,0.0417699481773,0.0418057714605,0.0420565344427,0.0420636990993,0.0424004379611,0.0425365664372,0.0423502853647,0.0422141568886,0.0422929681116,0.0423861086479,0.0423144620815,0.0422213215453,0.0420493697861,0.0417842774906,0.0416553136712,0.0416051610747,0.0415908317615,0.0415693377916,0.0417699481773,0.0418129361171,0.0418774180268,0.0423144620815,0.0424290965877,0.0423359560514,0.0426082130035,0.0426297069734,0.0426153776602,0.0428016587326,0.042579554377,0.0423144620815,0.042364614678,0.042500743154,0.0425938836903,0.0427300121663,0.0429592811786,0.0428159880459,0.0430165984317,0.043009433775,0.0432960200404,0.0433175140103,0.0436972408119,0.0434894657695,0.0433318433236,0.0434751364563,0.0431455622511,0.0433318433236,0.0433676666067,0.0434679717996,0.0438405339446,0.0443062366258,0.0438691925711,0.0440339796737,0.0440196503605,0.0441701081498,0.0443778831922,0.0445999875478,0.044342059909,0.0442990719692,0.0438978511977,0.0434823011129,0.0435037950828,0.0434751364563,0.04412712021,0.0438763572278,0.0439838270773,0.0437115701252,0.0439336744808,0.043969497764,0.0438476986012,0.0443635538789,0.0446214815177,0.0443205659391,0.0442274254028,0.0444925176983,0.0448579151867,0.045438252374,0.0454740756572,0.0457105093261,0.0460400835313,0.0459827662782,0.0464627982727,0.0470861233999,0.0468568543876,0.0470861233999,0.0469499949238,0.0466490793452,0.0466777379717,0.0467565491947,0.0471004527132,0.0470861233999,0.046985818207,0.046692067285,0.0466992319416,0.0465487741523,0.0465344448391,0.0465774327789,0.0468855130141,0.0471004527132,0.0468998423274,0.0470861233999,0.046985818207,0.0468711837009,0.0470073121769,0.0473010630989,0.0474228622617,0.0474443562316,0.0475374967678,0.047437191575,0.0474658502015,0.0473942036352,0.047494508828,0.0481106692986,0.0482539624313,0.0482253038047,0.0480676813588,0.0480963399853,0.0481321632685,0.0486766771727,0.0489775927513,0.0490993919141,0.0492856729866,0.0490778979442,0.0493859781795,0.0494361307759,0.0494862833723,0.0498230222342,0.05000213865,0.0500080949873,0.0499806446801,0.0500594559031,0.0498373515474,0.0502099136924,0.0496367411617,0.0498373515474,0.0498158575775,0.049787198951,0.0494791187157,0.0490134160345,0.049199697107,0.0492068617636,0.0491137212274,0.0493143316131,0.0498731748306,0.0497800342943,0.0500952791862,0.0504033594215,0.0511341543982,0.0514637286034,0
```

.0518004674652,0.051922266628,0.0523019934296,0.0515783631095,0.0520655597607,0.0518147967785,0.0521658649535,0.0519867485377,0.0514923872299,0.0518721140315,0.0516213510493,0.0517216562422,0.0520655597607,0.0518362907484,0.0513849173804,0.0516070217361,0.0512487889044,0.0514279053202,0.0517789734953,0.0515067165432,0.0515998570794,0.051549704483,0.0514207406636,0.0521228770137,0.0521730296102,0.0523879693092,0.0528536719904,0.0533193746716,0.0532477281053,0.0530614470328,0.0531689168823,0.053391021238,0.0532190694788,0.0533695272681,0.0536346195635,0.0538065713228,0.0535128204008,0.0533193746716,0.0531044349726,0.0533265393283,0.0532763867318,0.0535558083406,0.053469832461,0.0533480332982,0.0532119048221,0.053176081539,0.0537779126962,0.053763583383,0.0539641937687,0.0542507800341,0.054193462781,0.0543295912571,0.0548741051613,0.0553326431858,0.0559273096865,0.0559774622829,0.0555404182282,0.0555475828849,0.0555189242583,0.0554401130354,0.0559201450298,0.0557696872405,0.0558556631201,0.0561852373253,0.0560061209095,0.0563142011447,0.0567082572596,0.0568300564224,0.0573817349832,0.0577256385017,0.0573530763567,0.0572456065072,0.0572814297903,0.0570091728382,0.0568443857357,0.0570163374949,0.0570091728382,0.0573602410133,0.0575680160557,0.0573960642965,0.0577757910981,0.057876096291,0.0578474376644,0.0578904256042,0.0581196946165,0.0584349395084,0.0589078068463,0.0588576542499,0.0586212205809,0.0588075016534,0.0589651240994,0.0595168026602,0.0596242725097,0.0595812845699,0.0596027785398,0.0596959190761,0.0592087224249,0.0593878388408,0.0597389070159,0.0602834209201,0.0603407381731,0.0607562882579,0.060892416734,0.0612219909391,0.061479918578,0.0614727539213,0.0620745850786,0.0622107135547,0.0622966894343,0.0620172678255,0.0624471472236,0.0621892195848,0.0627265688323,0.0629988257844,0.0629343438747,0.0628626973084,0.0631492835737,0.0632639180799,0.063378552586,0.0633713879294,0.0637726087009,0.0641953234423,0.0642669700087,0.0645463916174,0.0653703271303,0.0657142306488,0.0662085919565,0.0666098127281,0.0670970093792,0.0674552422109,0.0674050896145,0.067512559464,0.0678994509222,0.0684869527662,0.0689168321643,0.0699700366895,0.0704070807442,0.0714602852694,0.0723988552885,0.0736741641694,0.0746198988451,0.0757089266535,0.0769985648476,0.0771203640104,0.078166403879,0.0781807331923,0.0785246367107,0.0783956728913,0.0785604599939,0.0787324117531,0.0789401867955,0.0792697610007,0.0791694558078,0.0798071102482,0.079635158489,0.0801940017065,0.0804949172851,0.0807528449239,0.0810322665327,0.0815481218103,0.0818562020456,0.0823004107569,0.082142788311,0.0825296797692,0.0828520893178,0.0832461454326,0.083238980776,0.0840127636925,0.0842277033915,0.0840055990359,0.0845644422533,0.0843709965242,0.0850731328744,0.0850301449346,0.0853238958566,0.0852450846336,0.0857322812847,0.0862624658756,0.0865132288578,0.0869789315391,0.0872368591779,0.0876595739193,0.0882542404199,0.0888704008905,0.0886626258481,0.0892644570054,0.0892214690656,0.0892286337222,0.0895797018973,0.0897946415963,0.090231685651,0.0901170511448,0.0898447941927,0.0900883925183,0.0906830590189,0.0904609546633,0.0911630910134,0.0910699504772,0.0910914444471,0.0910556211639,0.0905469305429,0.0910627858205,0.0911845849833,0.0912347375798,0.0915069945319,0.0919368739299,0.0922664481351,0.0925387050872,0.0933912992267,0.0939859657273,0.0947669133004,0.0950964875056,0.0953544151444,0.0951967926985,0.0955406962169,0.0961138687476,0.096185515314,0.0963001498201,0.0962714911936,0.0960207282114,0.0960063988981,0.0961425273742,0.0962499972237,0.0971384146463,0.0971670732729,0.096694205935,0.0965222541758,0.0966727119651,0.0966010653988,0.0971025913632,0.0973963422852,0.097496647478,0.0983349123042,0.0986716511661,0.0991660124738,0.0998466548541,0.100584614487,0.101136293048,0.10151601985,0.1022181562,0.10228263811,0.101867088025,0.102024710471,0.101573337103,0.101480196567,0.102039039784,0.101938734591,0.102719682164,0.10230413208,0.101967393218,0.102368613989,0.10375139272,0.103894685852,0.104926396408,0.105506733595,0.105427922372,0.106359327735,0.10658143209,0.108021528074,0.108952933436,0.109504611997,0.109776868949,0.110521993239,0.110507663926,0.110923214011,0.111654008987,0.111876113343,0.1116683383,0.111704161584,0.112420627247,0.112685719543,0.112449285874,0.112936482525,0.113961028423,0.114792128593,0.115429783033,0.115709204642,0.116540304812,0.117149300626,0.117822778349,0.118818665621,0.119965010683,0.120602665123,0.121648704992,0.121756174841,0.122372335312,0.123339563958,0.123862583892,0.12490862376,0.125274021249,0.126047804165,0.126542165473,0.126721281889,0.126556494786,0.127516558775,0.128390646885,0.12942235744,0.1307836422,0.131442790611,0.132546147732,0.133456059125,0.13459523953,0.135913536351,0.136988234846,0.138019945401,0.138557294649,0.138879704197,0.139667816427,0.140799832175,0.14127986417,0.14189602464,0.14255517305,0.143894963841,0.14

5263413258, 0.145915397012, 0.147076071387, 0.147971653466, 0.148616472563, 0.1491896450  
94, 0.150106721143, 0.151790415452, 0.153345145942, 0.15366755549, 0.154126093515, 0.1557  
23811944, 0.156483265547, 0.15741467091, 0.159105529875, 0.160882364721, 0.162028709782,  
0.163024597054, 0.164414540441, 0.166220033913, 0.167194427215, 0.168326442964, 0.169702  
057037, 0.171722490208, 0.172947646493, 0.174115485524, 0.176028448845, 0.177024336118, 0  
.178106199269, 0.179137909825, 0.180714134284, 0.181946455225, 0.182834872648, 0.1838880  
77173, 0.18525652659, 0.186316895772, 0.187133666628, 0.188867513534, 0.190952428614, 0.1  
93037343695, 0.194850001823, 0.196712812548, 0.199206113057, 0.200402610715, 0.202279750  
753, 0.20432884255, 0.206034030829, 0.206972600848, 0.208247909729, 0.209408584104, 0.212  
217129505, 0.21333481594, 0.215233449948, 0.218808613608, 0.220320356158, 0.223014267052  
, 0.225170828699, 0.227578153328, 0.229612915812, 0.232163533574, 0.233488995052, 0.23598  
229556, 0.238045716671, 0.239428495401, 0.241391611319, 0.242194052862, 0.24417866275, 0.  
246313730427, 0.247803979007, 0.24935154484, 0.250770146853, 0.252439511849, 0.253908266  
459, 0.255147752057, 0.257519253403, 0.260084200478, 0.261947011203, 0.263652199482, 0.26  
6768825117, 0.268416696143, 0.269928438693, 0.271139265664, 0.271913048581, 0.2731883574  
62, 0.273403297161, 0.273267168685, 0.274005128318, 0.274306043897, 0.273202686775, 0.272  
428903858, 0.271877225298, 0.271891554611, 0.272027683087, 0.271647956285, 0.27051594053  
7, 0.270035908543, 0.269398254102, 0.268925386764, 0.267807700329, 0.267771877046, 0.2675  
06784751, 0.266338945719, 0.264920343706, 0.262806769999, 0.261166063629, 0.258572457928  
, 0.255685101304, 0.253177471482, 0.250619689064, 0.247961601453, 0.24553994751, 0.243354  
727237, 0.242394663248, 0.242330181338, 0.24202926576, 0.242702743483, 0.243935064424, 0.  
243662807472, 0.24413567481, 0.241957619193, 0.239786728233, 0.23613275335, 0.2302362409  
4, 0.223823873252, 0.216616228678, 0.209508889297, 0.201183558288, 0.194484604335, 0.1878  
07144352, 0.182727402798, 0.177919918197, 0.174717316681, 0.172281333426, 0.170819743472  
, 0.170576145147, 0.169472788025, 0.168734828392, 0.168362266247, 0.167237415155, 0.16644  
9302925, 0.165990764901, 0.164543504261, 0.165066524195, 0.163547616989, 0.162788163385,  
0.162236484825, 0.16175645283, 0.160165899057, 0.159986782641, 0.159377786828, 0.1589192  
48803, 0.158553851315, 0.156891650975, 0.156762687156, 0.156067715463, 0.155480213619, 0.  
154641948792, 0.154204904738, 0.152528375085, 0.151503829187, 0.14994193404, 0.149211139  
064, 0.148380038894, 0.14700442482, 0

145743445253, 0.144145726823, 0.143257309401, 0.141888859983, 0.141007607217, 0.14045592  
8657, 0.139230772372, 0.138442660142, 0.137504090123, 0.13687360034, 0.135806066501, 0.13  
4494934337, 0.132581971016, 0.131292332822, 0.131055899153, 0.130095835164, 0.1295871445  
43, 0.128068237336, 0.126964880214, 0.126212591268, 0.125245362622, 0.124772495284, 0.124  
321121916, 0.123855419235, 0.122701909517, 0.121455259263, 0.12065281772, 0.120251596948  
, 0.119234215706, 0.117901589572, 0.117292593758, 0.116712256571, 0.116167742667, 0.11528  
6489901, 0.113975357737, 0.113187245507, 0.112406297934, 0.111102330426, 0.110550651866,  
0.109905832768, 0.109175037792, 0.107949881507, 0.106996982175, 0.106051247499, 0.105642  
862071, 0.104589657546, 0.10370840478, 0.103371665918, 0.103142396906, 0.102168003604, 0.  
101286750838, 0.100570285174, 0.0999183014204, 0.0991660124738, 0.098399394214, 0.098342  
0769609, 0.0974894828214, 0.0966655473085, 0.0957842945425, 0.095304262548, 0.0947310900  
172, 0.0942797166493, 0.0936993794619, 0.0930259017383, 0.0924885524907, 0.0917864161406  
, 0.091249066893, 0.0915571471283, 0.0911630910134, 0.0908335168082, 0.090740376272, 0.09  
01815330545, 0.089644183807, 0.0893719268549, 0.0888274129507, 0.088311557673, 0.0878028  
67052, 0.0867281685569, 0.0863197831287, 0.0855316708989, 0.0845572775967, 0.08431367927  
11, 0.0840987395721, 0.0834897437582, 0.0829094065708, 0.0828950772576, 0.0826156556488,  
0.0821212943411, 0.0814191579909, 0.0814621459307, 0.0809892785929, 0.0803946120922, 0.0  
804949172851, 0.0803659534657, 0.0804662586586, 0.0793843955068, 0.0788971988557, 0.0787  
252470965, 0.0782667090719, 0.0776863718845, 0.0779084762402, 0.0778439943305, 0.0767979  
544619, 0.0767191432389, 0.0764182276603, 0.0766546613292, 0.0766689906425, 0.0762892638  
408, 0.0758665490994, 0.0755369748943, 0.0749566377069, 0.0745410876221, 0.0747058747247  
, 0.0741971841037, 0.0736741641694, 0.0729791924758, 0.0725708070477, 0.0727141001804, 0.  
0726066303309, 0.0728287346865, 0.0724848311681, 0.0723272087221, 0.0720191284869, 0.071  
6465663419, 0.0718328474144, 0.0715677551189, 0.0715749197755, 0.0710518998413, 0.070901  
4420519, 0.070371257461, 0.0703282695212, 0.0699628720329, 0.0693682055322, 0.0694183581  
287, 0.0687663743749, 0.0686302458989, 0.0678134750426, 0.0675842060303, 0.0670755154093  
, 0.0671328326624, 0.0667960938005, 0.0669967041863, 0.0671614912889, 0.066982374873, 0.0  
66767435174, 0.0669895395297, 0.0671041740358, 0.0670253628128, 0.0671471619756, 0.06665



28006679, 0.0668390817403, 0.0659864876009, 0.0654992909498, 0.0650479175818, 0.06489029  
51359, 0.064496239021, 0.0645678855873, 0.0640018777132, 0.0643314519184, 0.064130841532  
6, 0.063908737177, 0.0638084319841, 0.0641093475627, 0.0644675803944, 0.0644890743643, 0.  
0645248976475, 0.0639947130566, 0.0639015725203, 0.0632782473932, 0.0632495887666, 0.062  
6262636394, 0.0629988257844, 0.062576111043, 0.0620889143919, 0.0617879988132, 0.0613652  
840718, 0.0612578142223, 0.0612004969692, 0.0610643684932, 0.0611431797162, 0.0612076616  
259, 0.0608709227641, 0.0606129951252, 0.0605126899324, 0.0605556778722, 0.0603980554262  
, 0.0608207701676, 0.0608422641375, 0.0606703123783, 0.0602117743537, 0.0600756458777, 0.  
0602690916068, 0.0604267140528, 0.0601687864139, 0.060011163968, 0.0600254932812, 0.0594  
23662124, 0.0590725939489, 0.0586068912677, 0.0585782326411, 0.0584421041651, 0.05782594  
36945, 0.0575178634593, 0.0575966746822, 0.0573459117, 0.0572312771939, 0.0568228917658,  
0.0568443857357, 0.0568945383321, 0.0563786830544, 0.0560491088493, 0.0561207554156, 0.0  
558986510599, 0.0557481932706, 0.0553613018124, 0.0552251733363, 0.055289655246, 0.05526  
81612761, 0.0551320328001, 0.0553039845593, 0.0552609966195, 0.0552180086797, 0.05520367  
93664, 0.0548454465347, 0.0553039845593, 0.0548669405046, 0.0546161775224, 0.05434392057  
03, 0.0545803542393, 0.0543295912571, 0.0540931575881, 0.053820900636, 0.0532978807017, 0  
.0532978807017, 0.0525957443516, 0.052803519394, 0.0528321780205, 0.0523879693092, 0.051  
7933028086, 0.0514279053202, 0.0516141863927, 0.0514135760069, 0.0517574795254, 0.051549  
704483, 0.05147089326, 0.0511484837115, 0.0512416242477, 0.0515210458565, 0.051621351049  
3, 0.0517216562422, 0.0513992466937, 0.0513061061574, 0.0508905560726, 0.0504964999578, 0  
.0502887249154, 0.050374700795, 0.0497728696377, 0.0492856729866, 0.0492140264202, 0.048  
669512516, 0.0484760667869, 0.0482467977746, 0.0479100589128, 0.04778825975, 0.047644966  
6174, 0.0472724044724, 0.0474515208882, 0.0472365811892, 0.0469499949238, 0.047387038978  
5, 0.0474730148581, 0.0476879545572, 0.0477452718102, 0.0479100589128, 0.0476592959306, 0  
.0475948140209, 0.0475876493643, 0.0477166131837, 0.0474730148581, 0.0472079225627, 0.04  
70001475203, 0.0463123404834, 0.0461690473507, 0.0458251438323, 0.0458752964287, 0.04584  
66378022, 0.0454167584041, 0.045223312675, 0.044929561753, 0.0448005979336, 0.0448077625  
902, 0.044771939307, 0.0444566944151, 0.0446143168611, 0.0445068470116, 0.0445999875478,  
0.0446214815177, 0.044635810831, 0.0448005979336, 0.0448292565601, 0.0446429754876, 0.04  
4635810831, 0.0448292565601, 0.0445999875478, 0.0447934332769, 0.0445426702948, 0.044492  
5176983, 0.0444925176983, 0.0443205659391, 0.0440554736436, 0.0436900761553, 0.043740228  
7517, 0.0438047106614, 0.0434966304262, 0.0433461726368, 0.0432315381307, 0.043410654546  
6, 0.0428804699556, 0.042794494076, 0.0431097389679, 0.0431885501909, 0.0432888553838, 0.  
0429736104919, 0.0431455622511, 0.0432315381307, 0.0430452570582, 0.0430022691184, 0.043  
2028795042, 0.0431813855343, 0.0428231527025, 0.0431169036245, 0.0429019639255, 0.043274  
5260705, 0.0435826063058, 0.043088244998, 0.0430165984317, 0.0428661406424, 0.0429234578  
954, 0.043167056221, 0.0433103493537, 0.0432530321006, 0.043303184697, 0.0430524217148, 0  
.0425508957504, 0.0426225423168, 0.0426941888831, 0.0426726949132, 0.0428016587326, 0.04  
24577552142, 0.0422714741417, 0.0421926629187, 0.0421998275754, 0.0420923577259, 0.04246  
49198708, 0.0425079078106, 0.0425150724673, 0.0422786387983, 0.042070863756, 0.042300132  
7683, 0.0423287913948, 0.0420207111595, 0.0417484542074, 0.041834430087, 0.0416624783278  
, 0.0418201007738, 0.0420135465029, 0.0419490645932, 0.0417986068039, 0.0416051610747, 0.  
0415335145084, 0.0412111049599, 0.0415478438217, 0.0416266550446, 0.0417341248942, 0.041  
5263498518, 0.0414905265686, 0.0416624783278, 0.0421711689488, 0.0421783336055, 0.041963  
3939064, 0.0426153776602, 0.0425150724673, 0.0424649198708, 0.0425294017805, 0.043181385  
5343, 0.0429879398051, 0.0425723897204, 0.0417484542074, 0.0418845826835, 0.042307297424  
9, 0.0418487594003, 0.0417484542074, 0.0415693377916, 0.0412182696165, 0.0406737557123, 0  
.040738237622, 0.0413758920624, 0.0418487594003, 0.0417341248942, 0.0414403739721, 0.041  
2970808395, 0.04118961099, 0.0412325989298, 0.0411322937369, 0.0409030247246, 0.04095317  
7321, 0.0407454022786, 0.0406236031159, 0.0407597315919, 0.040580615176, 0.0408242135016  
, 0.0406092738026, 0.0404516513566, 0.0405161332663, 0.0407454022786, 0.0405877798327, 0.  
0404301573867, 0.040580615176, 0.0405519565495, 0.0407024143388, 0.0404874746398, 0.0405  
304625796, 0.0405662858628, 0.0403800047903, 0.0402653702841, 0.0400504305851, 0.0401937  
237178, 0.0399429607356, 0.0398713141693, 0.0397136917233, 0.0399501253922, 0.0401077478  
382, 0.0398999727958, 0.0399787840188, 0.0398713141693, 0.0397638443197, 0.0395560692774  
, 0.0395775632473, 0.0392551536987, 0.039111860566, 0.0389972260599, 0.0385960052884, 0.0  
38818109644, 0.0388109449874, 0.0388109449874, 0.0391046959094, 0.0388539329272, 0.03917  
63424757, 0.0391333545359, 0.0391476838492, 0.0390617079696, 0.0393196356084, 0.03941277  
61447, 0.0395345753075, 0.0395417399641, 0.0391620131625, 0.0395847279039, 0.03918350713

24, 0.0393196356084, 0.0394629287411, 0.039269483012, 0.0391046959094, 0.038896920867, 0.0385673466618, 0.0381446319204, 0.0384312181858, 0.0380658206974, 0.0379870094745, 0.0376717645826, 0.0375929533596, 0.0376789292392, 0.037721917179, 0.0374783188534, 0.0375356361065, 0.0376359412994, 0.03750697748, 0.0373851783172, 0.0374138369437, 0.0375571300764, 0.0376001180162, 0.0376072826729, 0.0378938689382, 0.0380299974143, 0.0379870094745, 0.0380514913842, 0.0381159732939, 0.0381876198602, 0.0380729853541, 0.0380013387877, 0.0378723749683, 0.0378867042816, 0.037349355034, 0.0369123109793, 0.037055604112, 0.0371057567085, 0.0371129213651, 0.0370197808289, 0.036704535937, 0.0367117005936, 0.036546913491, 0.036683041967, 0.036919475636, 0.0373780136606, 0.0373063670942, 0.0371559093049, 0.0368621583829, 0.0372633791544, 0.0377290818356, 0.0380299974143, 0.0380228327576, 0.037643105956, 0.0374138369437, 0.037349355034, 0.0374926481667, 0.0378150577152, 0.0379941741311, 0.0374854835101, 0.037213226558, 0.0366472186839, 0.0363534677619, 0.036546913491, 0.0366615479971, 0.0365540781476, 0.0363534677619, 0.0362316685991, 0.0358519417975, 0.0362030099726, 0.0361456927195, 0.0365182548645, 0.0370699334253, 0.0367546885334, 0.0370842627386, 0.0371845679314, 0.0371057567085, 0.0367260299069, 0.0371630739615, 0.0367403592201, 0.0369338049492, 0.0369481342625, 0.0368693230395, 0.0371702386182, 0.0365755721175, 0.0365254195211, 0.0369552989191, 0.0368764876962, 0.0367833471599, 0.0368478290696, 0.0370341101421, 0.0367260299069, 0.0366328893706, 0.0365612428043, 0.0367690178467, 0.0366615479971, 0.0363176444787, 0.0366615479971, 0.0363677970751, 0.0365039255512, 0.0361815160027, 0.0363534677619, 0.0362245039425, 0.036253162569, 0.0361313634062, 0.0325275411192, 0.0288162489827, 0.0251049568462, 0.0216300983786, 0.0)

m <-

c(0.0220204840679, 0.0258195910197, 0.0296330342241, 0.0335898399551, 0.0373172656437, 0.0371810712435, 0.0372455843804, 0.0371810712435, 0.0371810712435, 0.0373172656437, 0.0375179731807, 0.0376254950756, 0.0376254950756, 0.0375251413071, 0.0374032831596, 0.037080717475, 0.0370878856013, 0.0374104512859, 0.0375753181913, 0.0372169118751, 0.0372957612647, 0.0371237262329, 0.037037708717, 0.0369015143169, 0.0370878856013, 0.0375609819387, 0.0372455843804, 0.0371022218539, 0.0369086824432, 0.0369660274538, 0.0369301868222, 0.0370305405907, 0.0370520449697, 0.0369015143169, 0.0370090362117, 0.0371595668645, 0.0374749644228, 0.0376541675809, 0.0378835476233, 0.0377401850968, 0.037611158823, 0.037589654444, 0.0374032831596, 0.0374391237912, 0.0372742568857, 0.0370448768433, 0.0368441693063, 0.036571780506, 0.0368943461905, 0.0375108050544, 0.0373746106543, 0.0369301868222, 0.0369875318328, 0.0371523987382, 0.0373746106543, 0.0374677962965, 0.0375108050544, 0.037854875118, 0.0377688576021, 0.0377473532231, 0.0382491220658, 0.0385931921294, 0.0389014215613, 0.0387508909085, 0.0383709802133, 0.0381631045499, 0.0382132814342, 0.0381989451815, 0.0380269101498, 0.0378046982337, 0.037546645686, 0.0374677962965, 0.0375179731807, 0.0373531062753, 0.0374247875385, 0.0373817787806, 0.0374032831596, 0.0371739031172, 0.0369946999591, 0.0371452306119, 0.0373387700226, 0.0376756719599, 0.0373961150332, 0.0376828400862, 0.0383351395817, 0.038607528382, 0.0384498296029, 0.0385788558767, 0.0389372621929, 0.0387652271611, 0.0387508909085, 0.0386863777716, 0.0387867315401, 0.0390304478351, 0.0384068208449, 0.0384713339819, 0.0386720415189, 0.0388440765507, 0.0389659346982, 0.0392239872459, 0.0392239872459, 0.0391666422353, 0.0393243410144, 0.0393386772671, 0.0396038979411, 0.0395465529305, 0.0395537210568, 0.0393960222777, 0.0391953147406, 0.0393315091408, 0.0391451378563, 0.0392669960038, 0.0392096509932, 0.0391236334774, 0.0388799171823, 0.0386648733926, 0.0387222184032, 0.0393100047618, 0.0394103585303, 0.0391308016037, 0.0393960222777, 0.0393243410144, 0.0393315091408, 0.0395752254358, 0.0393601816461, 0.0395465529305, 0.0396038979411, 0.0390949609721, 0.0390662884668, 0.039159474109, 0.0392956685091, 0.0394103585303, 0.0395895616884, 0.0394390310356, 0.0399192954993, 0.0399192954993, 0.0401056667838, 0.0399694723836, 0.0399981448889, 0.0403207105735, 0.0403350468261, 0.039890622994, 0.0400626580258, 0.0400626580258, 0.0403565512051, 0.0406146037528, 0.0405572587422, 0.0407364619003, 0.0412310626167, 0.0409228331847, 0.0410948682165, 0.041481947038, 0.0411092044692, 0.0411378769745, 0.0406934531424, 0.0409084969321, 0.0409658419427, 0.0410590275849, 0.0407651344056, 0.0410303550796, 0.0407938069109, 0.0413744251431, 0.0415751326802, 0.0417543358383, 0.0421557509125, 0.0419048664911, 0.0418618577332, 0.0420840696492, 0.0420769015229, 0.0419837158807, 0.0420840696492, 0.0415392920486, 0.041747167712, 0.0418260171016, 0.0419837158807, 0.0421342465335, 0.0421915915441, 0.0418260171016, 0.0418331852279, 0.0417184952067, 0.0418690258595, 0.0420052202597, 0.0422704409337, 0.0421055740282, 0.0418331852279, 0.0416109733118, 0.0417830083436, 0.0420769015229, 0.0421127421545, 0.0420697333966, 0.0420052202597, 0.042256104681, 0.04168265

45751, 0.0416253095645, 0.0416109733118, 0.0416181414382, 0.041524955796, 0.041675486448  
8, 0.0420769015229, 0.0424066353338, 0.0425499978603, 0.0424066353338, 0.0425858384919, 0  
.0429227404292, 0.0433886686402, 0.0437040661985, 0.0437685793354, 0.0436252168089, 0.04  
32381379874, 0.0430876073346, 0.0431091117136, 0.0432094654821, 0.0433241555033, 0.04309  
4775461, 0.0427937141553, 0.0428940679239, 0.0430230941977, 0.0430230941977, 0.043316987  
377, 0.0434531817772, 0.0436108805563, 0.0432811467454, 0.0429155723028, 0.043051766703,  
0.0434746861561, 0.0432381379874, 0.0431736248505, 0.0433743323876, 0.0432524742401, 0.0  
433313236296, 0.0432381379874, 0.0435248630404, 0.0439836231251, 0.0440266318831, 0.0435  
750399247, 0.0441556581569, 0.0440194637568, 0.0439334462409, 0.0443922063256, 0.0445857  
457364, 0.0444065425783, 0.0445355688521, 0.0445140644731, 0.0444065425783, 0.0448222939  
051, 0.0442488437991, 0.0442201712938, 0.0441484900306, 0.0437112343248, 0.0434961905351  
, 0.0432883148717, 0.0433026511244, 0.043316987377, 0.0435750399247, 0.0432883148717, 0.0  
433671642613, 0.0435105267878, 0.0437972518407, 0.0444065425783, 0.0442918525571, 0.0447  
936213998, 0.0444495513362, 0.0449728245579, 0.0450373376948, 0.0450803464527, 0.0453168  
946214, 0.045639460306, 0.0457469822009, 0.0453527352531, 0.0457326459482, 0.04558211529  
54, 0.0458903447274, 0.0455247702848, 0.0454530890216, 0.04590468098, 0.0456036196744, 0.  
0454315846426, 0.0456968053166, 0.045639460306, 0.0458258315905, 0.0458401678431, 0.0461  
268928961, 0.0463347685595, 0.0467863605179, 0.0467290155073, 0.0469512274234, 0.0470874  
218235, 0.0469798999287, 0.047252288729, 0.0471734393394, 0.0474314918871, 0.04761069504  
52, 0.04771821694, 0.0470945899498, 0.0472666249816, 0.0474314918871, 0.0477540575717, 0.  
0479691013614, 0.0481769770248, 0.0480837913826, 0.0481554726458, 0.0479332607298, 0.048  
1124638879, 0.048513878962, 0.0483346758039, 0.048270162667, 0.0484350295725, 0.04814830  
45195, 0.0481984814038, 0.0484780383304, 0.0486429052359, 0.0489081259099, 0.04892963028  
88, 0.0493812222473, 0.0497037879318, 0.0501123711323, 0.0500120173638, 0.0502413974062,  
0.0503417511747, 0.0504994499538, 0.0504851137012, 0.0507073256172, 0.0508936969017, 0.0  
5085785627, 0.0511589175757, 0.0512162625862, 0.0510800681861, 0.0515101557655, 0.051854  
2258291, 0.0523273221665, 0.0527430734933, 0.0528362591355, 0.0530728073042, 0.053051302  
9252, 0.0527932503776, 0.0531301523148, 0.0538613011999, 0.0538397968209, 0.053646257410  
1, 0.0535243992626, 0.0534813905047, 0.053467054252, 0.0533523642308, 0.0537824518103, 0.  
0542913887793, 0.0544204150532, 0.0543343975373, 0.0543630700426, 0.0544849281901, 0.054  
7286444851, 0.0552949264647, 0.0556533327809, 0.0563558091607, 0.0566640385926, 0.056735  
7198559, 0.0570941261721, 0.0572733293302, 0.057689080657, 0.0580331507205, 0.0585707601  
948, 0.0585420876896, 0.0585420876896, 0.0584704064263, 0.0587356271003, 0.0589291665111  
, 0.0588001402372, 0.0588431489952, 0.0585277514369, 0.0587356271003, 0.0585850964475, 0.  
0586424414581, 0.0592660684483, 0.0589076621321, 0.058728458974, 0.0588789896268, 0.0592  
947409536, 0.0596961560277, 0.059990049207, 0.0603914642812, 0.0605491630603, 0.06064951  
68289, 0.0604631455444, 0.0607928793553, 0.0611871263032, 0.0611656219242, 0.06131615257  
7, 0.0611011087873, 0.0612444713138, 0.0612086306821, 0.0613233207033, 0.0617677445354, 0.  
.0619326114409, 0.0625060615468, 0.0628071228524, 0.0633088916951, 0.0628788041157, 0.06  
30723435264, 0.0632802191898, 0.0631153522844, 0.0632945554425, 0.0627282734629, 0.06269  
24328313, 0.0626780965786, 0.0622336727465, 0.0623196902624, 0.0627641140945, 0.06342358  
17163, 0.0640185362012, 0.0639611911906, 0.0643554381385, 0.0644199512754, 0.06474251696  
, 0.0651439320341, 0.0655023383503, 0.0654091527081, 0.0658464084139, 0.0656958777611, 0.  
0649145519917, 0.0655668514872, 0.0652586220553, 0.0657890634033, 0.0665058760357, 0.066  
2764959933, 0.0666635748148, 0.0669646361205, 0.0669001229835, 0.0670936623943, 0.068082  
863827, 0.0678964925426, 0.0682333944798, 0.0689143664806, 0.0690720652598, 0.0693874628  
18, 0.0691007377651, 0.0692154277863, 0.0696598516184, 0.0698390547765, 0.0700899391978,  
0.0706418849248, 0.070978786862, 0.0713156887992, 0.0709286099777, 0.0715665732206, 0.07  
15522369679, 0.0715665732206, 0.071731440126, 0.0720540058106, 0.0719966608, 0.072448252  
7585, 0.0729285172222, 0.0726919690535, 0.0731865697698, 0.0728711722116, 0.07381019676,  
0.0737456836231, 0.074139930571, 0.0744409918766, 0.0749642650982, 0.0749355925929, 0.07  
52796626565, 0.0759176258994, 0.0760538202995, 0.0761828465734, 0.0767921373109, 0.07815  
40813125, 0.0786128413972, 0.0789425752082, 0.0791934596295, 0.0795662021984, 0.07957337  
03247, 0.0798744316303, 0.0806055805154, 0.0812077031266, 0.0813295612741, 0.08117903062  
13, 0.0813797381584, 0.0817381444746, 0.082168232054, 0.0823832758438, 0.0823546033385, 0.  
.0824621252333, 0.0827631865389, 0.0835588485609, 0.0840104405194, 0.0852361901208, 0.08  
59171621216, 0.0865336209855, 0.0869780448176, 0.087960078124, 0.0893650308835, 0.090110  
5160212, 0.0904115773268, 0.0903542323163, 0.091035204317, 0.0907269748851, 0.0908416649  
063, 0.091343433749, 0.0919025476023, 0.0917950257074, 0.0917448488231, 0.0924831658345,

0.093400686004, 0.093909622973, 0.0946049312265, 0.0952715669746, 0.0960672289966, 0.0967338647448, 0.0973001467244, 0.0980599681147, 0.0987911169998, 0.0990921783054, 0.0994935933796, 0.100683502349, 0.101027572413, 0.101937924456, 0.102454029551, 0.102841108373, 0.103815973553, 0.10464030808, 0.105643845766, 0.106403667156, 0.107005789767, 0.107550567368, 0.108066672463, 0.10875481259, 0.109579147118, 0.110338968508, 0.110898082361, 0.111629231246, 0.111966133184, 0.113127369648, 0.114252765481, 0.115170285651, 0.116904972221, 0.117127184137, 0.118209571212, 0.119593019593, 0.120682574794, 0.12174345749, 0.122897525828, 0.12355699345, 0.123944072271, 0.124954778083, 0.124739734293, 0.126331058337, 0.127019198464, 0.127836364865, 0.12899760133, 0.129922289626, 0.13067494289, 0.131857683733, 0.133613874683, 0.134373696073, 0.136201568286, 0.136438116454, 0.138072449256, 0.138653067489, 0.138975633173, 0.140050852122, 0.140868018523, 0.141857219955, 0.141971909977, 0.143161818946, 0.143756773431, 0.145613318149, 0.145957388213, 0.14740534973, 0.148258356763, 0.150100565228, 0.151376491714, 0.152415870031, 0.153892504054, 0.154652325444, 0.155978428814, 0.15647302953, 0.157777628521, 0.158236388606, 0.159791872019, 0.159497978839, 0.160293640861, 0.160945940357, 0.162171689958, 0.163053369496, 0.163261245159, 0.164121420318, 0.163992394045, 0.165060444867, 0.165103453625, 0.166035310047, 0.166780795185, 0.167117697122, 0.168092562302, 0.169275303145, 0.170178487062, 0.171124679737, 0.172013527401, 0.172472287486, 0.173941753382, 0.175303697384, 0.177489975913, 0.180149350779, 0.184063147752, 0.189202694327, 0.194277727764, 0.200786386467, 0.208965218602, 0.216993520085, 0.224541557105, 0.231100392691, 0.236748876235, 0.241651874641, 0.243995851949, 0.245078239024, 0.246110449214, 0.246827261847, 0.245694697887, 0.244999389634, 0.244583638307, 0.244999389634, 0.246239475488, 0.246906111236, 0.249543981724, 0.252439904759, 0.256117153563, 0.258289095839, 0.260439533736, 0.263070236097, 0.26427448132, 0.265937486627, 0.267492970039, 0.269414027894, 0.270367388695, 0.271550129539, 0.272044730255, 0.273571541162, 0.275420917754, 0

276187907271, 0.277478170009, 0.27794409822, 0.277635868788, 0.278675247105, 0.27829533641, 0.277822240072, 0.277005073671, 0.275628793417, 0.274997998301, 0.27306977232, 0.272919241667, 0.272245437792, 0.270560928106, 0.269206152231, 0.267880048861, 0.266654299259, 0.264740409531, 0.263263775508, 0.261321213274, 0.259651039841, 0.256769453058, 0.255364500299, 0.253923706908, 0.251737428379, 0.249802034271, 0.246705403699, 0.244676823949, 0.242691252958, 0.239902851818, 0.238024802721, 0.236211266761, 0.233508883136, 0.231508975892, 0.228476858457, 0.226699163128, 0.225358723506, 0.224111469525, 0.221903686618, 0.219437851162, 0.218068739034, 0.216040159284, 0.214104765177, 0.213172908755, 0.212155034817, 0.209337961171, 0.207581770222, 0.20518761603, 0.203710982007, 0.20364646887, 0.200908244614, 0.199374265581, 0.197782941537, 0.195811706798, 0.193030473784, 0.191976759214, 0.190134550749, 0.189776144433, 0.18843570481, 0.186335443797, 0.185468100512, 0.184335536553, 0.183461025141, 0.181862532971, 0.181031030317, 0.179919970737, 0.178851919915, 0.177131569597, 0.174651397889, 0.173762550224, 0.172013527401, 0.170171318936, 0.168429464239, 0.166078318805, 0.165046108614, 0.163426112065, 0.161677089242, 0.160250632103, 0.159347448186, 0.157598425363, 0.156702409573, 0.155720376266, 0.154616484812, 0.154430113528, 0.153419407716, 0.152430206284, 0.151412332346, 0.150423130913, 0.149591628259, 0.148365878658, 0.147261987204, 0.146072078234, 0.145111549307, 0.143928808463, 0.142824917009, 0.142093768124, 0.141075894186, 0.140423594691, 0.139735454564, 0.138817934394, 0.137871741719, 0.136982894055, 0.13638793957, 0.135133517463, 0.134337855441, 0.133298477124, 0.132416797587, 0.131692816828, 0.131441932406, 0.1301875103, 0.129298662636, 0.129105123225, 0.127434949791, 0.126940349075, 0.1261303508, 0.125270175641, 0.125090972483, 0.12396557665, 0.123134073997, 0.122962038965, 0.12299071147, 0.12147106869, 0.120940627342, 0.120230982835, 0.119951425909, 0.119628860224, 0.118775853192, 0.11790134178, 0.116725769063, 0.115643381988, 0.114374623629, 0.114281437986, 0.11378683727, 0.113750996638, 0.112711618321, 0.112095159457, 0.111772593773, 0.111191975541, 0.110776224214, 0.110747551709, 0.11056834855, 0.109980562192, 0.109485961475, 0.108661626948, 0.10834622939, 0.107787115537, 0.106855259115, 0.106905435999, 0.106217295872, 0.10561517326, 0.105099068165, 0.104403759912, 0.104317742396, 0.10395933608, 0.104117034859, 0.103622434142, 0.103557921005, 0.10290562151, 0.102776595236, 0.102848276499, 0.102497038309, 0.102346507657, 0.101966596961, 0.101493500624, 0.100812528623, 0.100396777296, 0.100289255402, 0.0996656284114, 0.099436248369, 0.098884302642, 0.0987194357366, 0.0985904094627, 0.098325188787, 0.0984470469362, 0.0984470469362, 0.0989774882842, 0.0984255425573, 0.0989631520316, 0.0987337719892, 0.0987266038629, 0.0989989926632, 0.0987839488735, 0.0988197895051, 0.0

982821800308, 0.0974148367456, 0.0965044847024, 0.0961317421335, 0.0955582920276, 0.095500947017, 0.095278735101, 0.0945905949738, 0.094483073079, 0.0945475862159, 0.0947339575003, 0.0947913025109, 0.0947411256266, 0.0947984706372, 0.0948988244058, 0.0943683830578, 0.0944042236894, 0.0940386492469, 0.094239356784, 0.0937877648255, 0.0934508628883, 0.0933505091198, 0.0932788278565, 0.0927842271401, 0.0922322814132, 0.0923326351817, 0.0915083006544, 0.0917878575811, 0.091078213075, 0.0910208680644, 0.0904760904638, 0.0905979486113, 0.0900961797686, 0.0902897191793, 0.0897162690734, 0.0894295440204, 0.0891786595991, 0.0890854739569, 0.0889206070514, 0.0885837051142, 0.0883901657034, 0.0881034406505, 0.0882396350506, 0.0880532637662, 0.0881607856611, 0.0881392812821, 0.0878382199765, 0.0875013180392, 0.0868705229227, 0.0862468959325, 0.0861107015323, 0.0855444195527, 0.0850784913417, 0.0848347750466, 0.0839029186245, 0.08322911475, 0.0833223003922, 0.0825839833808, 0.0829352215707, 0.0827631865389, 0.0823330989595, 0.0817739851062, 0.0811790306213, 0.0807417749155, 0.0809209780736, 0.0804765542415, 0.0801253160516, 0.0800249622831, 0.0792077958822, 0.0784623107444, 0.078297443839, 0.0784408063655, 0.0785268238814, 0.0777311618594, 0.0775519587013, 0.0770071811006, 0.0768996592058, 0.0767347923003, 0.0767132879213, 0.076483907879, 0.0755878920884, 0.0749212563403, 0.0741901074552, 0.07381019676, 0.0728711722116, 0.0726776328008, 0.0714590513257, 0.0703336554928, 0.0691724190283, 0.068591800796, 0.0684197657643, 0.0680470231954, 0.0674233962052, 0.0673445468156, 0.0670793261416, 0.0666349023095, 0.0663911860145, 0.066577557299, 0.0662549916144, 0.0658033996559, 0.0653661439502, 0.0646278269388, 0.0643984468964, 0.0642837568752, 0.0636672980113, 0.063638625506, 0.0636314573797, 0.0630078303895, 0.0626494240733, 0.0625060615468, 0.0622910177571, 0.0619756201988, 0.0621189827253, 0.0615311963667, 0.0622336727465, 0.0616960632722, 0.0614093382192, 0.0611727900505, 0.0613734975876, 0.0611011087873, 0.0609434100082, 0.0609434100082, 0.0602911105127, 0.0599398723228, 0.0597750054173, 0.0596244747645, 0.0594882803643, 0.059258900322, 0.0590080159006, 0.0588288127425, 0.0587212908477, 0.0587212908477, 0.0589219983847, 0.0590008477743, 0.0586424414581, 0.0583127076472, 0.0580331507205, 0.0580259825942, 0.0579399650783, 0.0579686375836, 0.0579471332046, 0.0574955412462, 0.0570081086562, 0.0569364273929, 0.0565421804451, 0.0565995254557, 0.0564131541713, 0.0557035096652, 0.0553952802332, 0.0550440420434, 0.0548003257483, 0.054793157622, 0.0549365201485, 0.054771653243, 0.0547214763588, 0.0546928038535, 0.0545996182113, 0.0549365201485, 0.055302094591, 0.0558253678127, 0.0559472259602, 0.0560260753498, 0.0556318284019, 0.0556174921493, 0.0554454571175, 0.055079882675, 0.0555744833913, 0.0553952802332, 0.0547788213694, 0.0542913887793, 0.0540763449896, 0.054018999979, 0.0541551943792, 0.0536820980418, 0.0535889123995, 0.0539401505894, 0.0533523642308, 0.0535817442732, 0.0534957267573, 0.0534455498731, 0.0533021873466, 0.0532376742097, 0.0532591785886, 0.0532305060833, 0.0534025411151, 0.0529007722724, 0.0527932503776, 0.0528864360198, 0.0528531803291991, 0.0530369666726, 0.0528720997671, 0.0527860822512, 0.0525997109668, 0.0528290910092, 0.052226968398, 0.0525495340825, 0.0526068790931, 0.0520405971135, 0.0522198002716, 0.051961747724, 0.0517825445659, 0.0514743151339, 0.0513739613654, 0.0511804219546, 0.0513811294917, 0.0511302450704, 0.0509295375333, 0.0514814832602, 0.0509367056596, 0.0510227231755, 0.0510298913018, 0.0511087406914, 0.0513596251127, 0.0515029876392, 0.0514958195129, 0.0514384745023, 0.0511015725651, 0.0505782993434, 0.0507073256172, 0.0506858212383, 0.0509653781649, 0.0509152012806, 0.050614139975, 0.0505066180802, 0.0500335217428, 0.0500621942481, 0.0505711312171, 0.0504851137012, 0.0502557336588, 0.05037042368, 0.0499475042269, 0.0497324604371, 0.0491805147102, 0.0488794534046, 0.0493238772367, 0.0493668859946, 0.0491231696996, 0.0493955584999, 0.0494313991315, 0.0489511346678, 0.049065824689, 0.0493955584999, 0.0497611329424, 0.049596266037, 0.0489511346678, 0.0484493658251, 0.0480766232563, 0.0477468894453, 0.0473669787502, 0.0475318456556, 0.0475103412766, 0.0472164480974, 0.0471017580762, 0.0471519349604, 0.0473884831291, 0.0472737931079, 0.0471949437184, 0.0471447668341, 0.0471949437184, 0.0471089262025, 0.0469153867917, 0.0465283079702, 0.0465641486019, 0.0462559191699, 0.046478131086, 0.0464279542017, 0.0464422904543, 0.0464494585807, 0.0464924673386, 0.0469727318023, 0.0469942361813, 0.0470874218235, 0.0473598106238, 0.0477038806874, 0.0475103412766, 0.0474673325187, 0.0473813150028, 0.0472451206027, 0.0472809612343, 0.0467720242653, 0.0465211398439, 0.0464279542017, 0.0460265391275, 0.0454315846426, 0.0448724707893, 0.0449441520526, 0.0450301695685, 0.0448509664104, 0.044621586368, 0.0441914987886, 0.0439621187462, 0.0440553043884, 0.0437685793354, 0.0441413219043, 0.0441628262833, 0.043847428725, 0.0440553043884, 0.0441413219043, 0.0445212325995, 0.0446072501154, 0.0448581345367, 0.0446932676312, 0.0447362763892, 0.0447434445155, 0.0449154795473, 0.0451663639686, 0.0449298157999, 0.0444280469572, 0.

0440338000094, 0.043825924346, 0.0434675180298, 0.0432381379874, 0.0429585810608, 0.0427435372711, 0.0426431835025, 0.0424281397128, 0.0421557509125, 0.0422704409337, 0.0421629190388, 0.0424138034602, 0.0426360153762, 0.0428510591659, 0.0429585810608, 0.0427937141553, 0.0426933603868, 0.0427292010184, 0.0427220328921, 0.0429872535661, 0.0425356616077, 0.0423851309549, 0.041990884007, 0.0419765477544, 0.042012388386, 0.0419263708701, 0.0420553971439, 0.042033892765, 0.0419407071228, 0.0416754864488, 0.0419765477544, 0.0420984059019, 0.042256104681, 0.042564334113, 0.0426288472499, 0.0425715022393, 0.0424281397128, 0.0421700871651, 0.041747167712, 0.0418188489752, 0.0419048664911, 0.0416181414382, 0.0415607964276, 0.0411378769745, 0.0409801781953, 0.0410590275849, 0.040994514448, 0.041235407218, 0.0414317701537, 0.0412740713746, 0.0410733638375, 0.0411665494797, 0.0412238944903, 0.0410805319639, 0.0410303550796, 0.0408941606794, 0.0412310626167, 0.0413815932695, 0.0417615039647, 0.0419693796281, 0.0420769015229, 0.0420482290176, 0.0418116808489, 0.0418403533542, 0.0418475214805, 0.0417543358383, 0.0416754864488, 0.0413887613958, 0.040973010069, 0.04095150569, 0.04095150569, 0.04095150569, 0.040994514448, 0.0408583200478, 0.0406361081318, 0.0407507981529, 0.0405429224895, 0.0405715949948, 0.0406074356265, 0.0363567367162, 0.0321490465639, 0.0279915332959, 0.024034727565, 0.0)

ycorr <- c(-8.1216508887e-05, -8.15131308575e-05, -8.24040133671e-05, -8.38939801839e-05, -8.59905292342e-05, -8.8700354574e-05, -9.20310633918e-05, -9.53768228354e-05, -9.87428648573e-05, -0.000102134044883, -0.000105559348007, -0.000109021778322, -0.000112524403615, -0.000116068435705, -0.000119653433928, -0.000123276381377, -0.000126931735478, -0.000130614525992, -0.000134320413202, -0.000138048366144, -0.000141794518837, -0.000145556703807, -0.000149333789014, -0.000153121279139, -0.000156918214166, -0.000160721449371, -0.000164531077607, -0.00016834648795, -0.0001721645223, -0.000175981681937, -0.000179793251992, -0.000183599302976, -0.000187395543164, -0.00019117923022, -0.00019494944614, -0.000198702221682, -0.000202435380993, -0.000206143496954, -0.000209823792955, -0.000213474880448, -0.000217094158208, -0.000220678306148, -0.000224225262525, -0.000227734513956, -0.000231205074446, -0.000234636544059, -0.000238026849783, -0.000241375901164, -0.000244685360361, -0.000247953273305, -0.0002511817581, -0.000254371793883, -0.000257525044617, -0.000260639815754, -0.000263713019356, -0.000266746581323, -0.000269740345723, -0.000272696891157, -0.000275614701319, -0.000278493314378, -0.000281334390271, -0.000284136227213, -0.000286896692127, -0.000289618113164, -0.000292302264929, -0.000294948347414, -0.000297556095733, -0.000300124784058, -0.000302654984509, -0.000305150315594, -0.000307609141046, -0.000310031823428, -0.000312419258524, -0.000314772023817, -0.000317087046083, -0.00031936416514, -0.000321605950915, -0.000323813278316, -0.000325987029399, -0.000328126256028, -0.000330230770266, -0.000332304066689, -0.000334347291601, -0.000336360309921, -0.000338346135535, -0.000340306827822, -0.00034224205923, -0.000344152643936, -0.000346035823345, -0.000347892226583, -0.000349721368726, -0.000351521126722, -0.000353290136075, -0.000355026108175, -0.00035673019265, -0.000358401489835, -0.00036003930274, -0.000361643156391, -0.000363214908647, -0.000364755587916, -0.00036626545196, -0.00036774544604, -0.000369197024131, -0.000370623883228, -0.00037202723315, -0.000373407260308, -0.000374765221432, -0.000376101962176, -0.000377417489273, -0.000378710845109, -0.000379983521572, -0.000381235819637, -0.000382468263702, -0.000383680061952, -0.000384869590255, -0.000386037672031, -0.000387183261303, -0.00038830671665, -0.000389409406722, -0.000390492344298, -0.000391555479009, -0.000392598585394, -0.00039362273521, -0.000394627556815, -0.000395613921012, -0.000396581207935, -0.000397528974204, -0.000398457715519, -0.000399367633416, -0.000400257167125, -0.000401126483054, -0.000401976563249, -0.00040280566279, -0.000403613605435, -0.000404400627915, -0.000405167817119, -0.000405917528148, -0.000406650061801, -0.000407365571879, -0.000408064567593, -0.000408748949313, -0.000409417302541, -0.000410069958648, -0.000410709061084, -0.000411335482829, -0.000411949816669, -0.000412550983059, -0.000413136690866, -0.0004137064867, -0.000414260275487, -0.000414796188088, -0.000415314707837, -0.000415817480181, -0.000416304888945, -0.000416775704511, -0.000417228215575, -0.000417662997089, -0.000418081364036, -0.000418484992432, -0.000418875709744, -0.000419255136525, -0.000419624799243, -0.000419984391192, -0.000420333126165, -0.000420670965606, -0.000420999692076, -0.000421318919149, -0.00042162948213, -0.00042193000539, -0.000422219396949, -0.000422496075698, -0.000422759160469, -

0.000423008510939, -0.000423244633986, -0.000423469290161, -0.000423681282163, -  
0.000423881545383, -0.000424069880012, -0.000424246070303, -0.000424412696232, -  
0.000424571650559, -0.000424724379859, -0.000424871496095, -0.000425012441702, -  
0.000425146605706, -0.000425274253422, -0.000425396881311, -0.000425513693114, -  
0.000425626578642, -0.000425733751961, -0.000425833546078, -0.000425924793605, -  
0.000426006971264, -0.000426080021847, -0.000426144635902, -0.000426201989738, -  
0.00042624992612, -0.000426289720668, -0.000426321130543, -0.000426344146055, -  
0.000426361293319, -0.000426372708985, -0.000426379694412, -0.000426383159369, -  
0.000426382250048, -0.000426375402253, -0.000426361759807, -0.000426342331123, -  
0.000426316207048, -0.000426284167816, -0.000426245498784, -0.000426199357774, -  
0.000426146206168, -0.000426085078458, -0.000426015834036, -0.00042593966217, -  
0.000425858288032, -0.000425771783612, -0.000425679205175, -0.000425579876197, -  
0.000425472245323, -0.000425357491364, -0.000425234599448, -0.000425102748716, -  
0.000424962020109, -0.000424812592774, -0.000424653630306, -0.00042448408466, -  
0.000424305097114, -0.000424117100542, -0.000423921153352, -0.000423717572804, -  
0.000423505516683, -0.000423285655384, -0.000423058641179, -0.000422823990909, -  
0.000422582805259, -0.000422335111676, -0.000422081573002, -0.000421820786161, -  
0.00042155365827, -0.000421279277108, -0.000420998209112, -0.000420709896119, -  
0.000420414385788, -0.000420110916689, -0.000419798916402, -0.000419477009284, -  
0.000419145248206, -0.000418802926355, -0.000418449456501, -0.000418083616513, -  
0.000417704274638, -0.000417312155393, -0.000416907203377, -0.000416489462502, -  
0.000416058978898, -0.00041561593984, -0.000415159522956, -0.000414691189645, -  
0.000414211031385, -0.000413719961728, -0.000413219180517, -0.000412708755565, -  
0.000412187313265, -0.000411654677364, -0.000411110488375, -0.000410555260128, -  
0.000409988724031, -0.000409410749545, -0.000408819614675, -0.000408214671773, -  
0.000407594486407, -0.000406958629608, -0.000406308475343, -0.000405644206347, -  
0.000404965787827, -0.000404273156517, -0.00040356529646, -0.000402843194687, -  
0.000402107715056, -0.000401359765743, -0.000400600231703, -0.000399829014378, -  
0.00039904477655, -0.000398246231102, -0.000397432516894, -0.000396602443322, -  
0.000395755708943, -0.000394890517747, -0.000394005061078, -0.000393097296142, -  
0.000392166311282, -0.00039121180978, -0.000390234477891, -0.000389234916009, -  
0.000388213584426, -0.000387171623253, -0.000386110635987, -0.00038503041651, -  
0.000383933303841, -0.000382819868425, -0.000381690902059, -0.000380545990564, -  
0.00037938398824, -0.000378205011464, -0.000377010300484, -0.000375798788054, -  
0.000374570671259, -0.00037332672925, -0.000372066797193, -0.000370791149357, -  
0.000369500795659, -0.000368196970263, -0.000366880388406, -0.000365553107629, -  
0.00036421389272, -0.000362864151821, -0.000361503472881, -0.000360131749994, -  
0.000358748132344, -0.000357353393759, -0.000355946288074, -0.000354526703274, -  
0.000353094357195, -0.000351648018246, -0.00035018709912, -0.000348712780025, -  
0.000347223496772, -0.000345720430476, -0.000344203318502, -0.000342672452666, -  
0.00034112850523, -0.000339572793249, -0.000338005744946, -0.000336428130548, -  
0.000334841311231, -0.000333244427956, -0.000331637325737, -0.000330019508159, -  
0.000328391861231, -0.000326754663082, -0.000325107565481, -0.000323449460033, -  
0.000321779259341, -0.000320096076589, -0.000318399476591, -0.000316688784783, -  
0.000314965092384, -0.000313228909941, -0.000311479577645, -0.00030971640018, -  
0.000307939401563, -0.000306148981613, -0.000304346244635, -0.000302532974499, -  
0.00030070980585, -0.00029887694306, -0.000297035603862, -0.000295185526171, -  
0.000293326705096, -0.000291460622046, -0.000289587790694, -0.000287708058655, -  
0.000285821848537, -0.000283927710438, -0.000282025030135, -0.000280114008157, -  
0.000278193541821, -0.000276264378936, -0.000274326861022, -0.000272380378285, -  
0.000270424924805, -0.00026846042458, -0.00026648683215, -0.000264503924609, -  
0.00026251143432, -0.000260509395699, -0.000258498657701, -0.000256478868688, -  
0.000254449225939, -0.000252409763397, -0.000250360549457, -0.000248301133516, -  
0.000246231649314, -0.000244152708083, -0.000242064523252, -0.000239968538257, -  
0.000237864050874, -0.000235750238763, -0.000233629184328, -0.000231501512062, -  
0.00022936760906, -0.000227228112928, -0.000225083135459, -0.00022293230202, -  
0.000220776297888, -0.000218613659482, -0.000216444827302, -0.000214270609048, -  
0.000212090061511, -0.000209902278882, -0.000207705209293, -0.000205498107352, -  
0.000203280530567, -0.000201051790091, -0.000198812075808, -0.000196561201432, -

0.000194300113627, -0.000192028445581, -0.000189746632944, -0.000187454442578, -  
0.000185152919711, -0.000182842864958, -0.000180525443991, -0.000178201702392, -  
0.000175871906355, -0.000173535655951, -0.000171192019602, -0.000168840056248, -  
0.000166479028462, -0.000164108574279, -0.000161728957105, -0.000159339674431, -  
0.000156939790865, -0.000154528784201, -0.000152105292107, -0.000149668599843, -  
0.000147218951511, -0.000144756819502, -0.000142282368162, -0.000139795247233, -  
0.000137295076071, -0.000134781985749, -0.000132254717973, -0.000129713237191, -  
0.000127157170593, -0.000124588097947, -0.000122006534291, -0.000119412445097, -  
0.000116805860244, -0.000114187307234, -0.000111556064048, -0.000108911832928, -  
0.000106255835159, -0.000103588274597, -0.00010090957614, -9.82181770678e-05, -  
9.55122263664e-05, -9.27913456625e-05, -9.00546448789e-05, -8.73006139112e-05, -  
8.45297946636e-05, -8.1743033329e-05, -7.89393663435e-05, -7.61178805709e-05, -  
7.32784976412e-05, -7.04214090296e-05, -6.75471895495e-05, -6.46555804377e-05, -  
6.1746996244e-05, -5.88219236719e-05, -5.58810527999e-05, -5.29236276427e-05, -  
4.99491279353e-05, -4.69579066643e-05, -4.39491816114e-05, -4.09238518408e-05, -  
3.78817259987e-05, -3.48234237469e-05, -3.17492507767e-05, -2.86589712595e-05, -  
2.55526400009e-05, -2.24289694376e-05, -1.92873521185e-05, -1.61281126e-05, -  
1.2951439268e-05, -9.75644416101e-06, -6.54172408737e-06, -3.30642942178e-06, -  
4.94365479844e-08, 3.22923615188e-06, 6.53027075292e-06, 9.85363217976e-  
06, 1.31980981873e-05, 1.65630554065e-05, 1.99488808697e-05, 2.33559277144e-  
05, 2.67827339695e-05, 3.02287648903e-05, 3.36934313434e-05, 3.7175785856e-  
05, 4.0676325344e-05, 4.4195267115e-05, 4.77329866714e-05, 5.12914489489e-  
05, 5.48709981866e-05, 5.84717540096e-05, 6.20946176467e-05, 6.57400145454e-  
05, 6.94083881382e-05, 7.31000969696e-05, 7.68159109644e-05, 8.05554023694e-  
05, 8.43180241647e-05, 8.81034250202e-05, 9.19104619449e-05, 9.57395176157e-  
05, 9.95901098825e-  
05, 0.000103461859945, 0.00010735599296, 0.000111272634665, 0.000115211924715, 0.0001191  
73662778, 0.000123159015499, 0.000127168397215, 0.000131202942855, 0.000135262001519, 0.  
000139345068833, 0.000143452915756, 0.000147584679154, 0.00015174003689, 0.000155918959  
982, 0.000160121309998, 0.000164346842188, 0.000168594736611, 0.000172864178284, 0.00017  
715559064, 0.000181469660121, 0.000185806765916, 0.000190165792724, 0.000  
194547894742, 0.00019895188028, 0.000203378090787, 0.000207825838887, 0.000212294621702  
, 0.000216784836721, 0.000221296345775, 0.00022582868264, 0.00023038154903, 0.0002349555  
35658, 0.000239550491471, 0.000244165692895, 0.000248801618363, 0.000253457357159, 0.000  
258133536722, 0.000262830491575, 0.000267547141042, 0.000272283527145, 0.00027703942742  
5, 0.000281813862479, 0.000286605410807, 0.000291415022117, 0.000296241815849, 0.0003010  
86067027, 0.00030594829648, 0.000310827846152, 0.000315724762344, 0.000320639069659, 0.0  
00325570264853, 0.000330517851093, 0.000335482160318, 0.000340462586802, 0.000345457393  
392, 0.000350466088915, 0.000355486740962, 0.00036051779592, 0.000365557378064, 0.000370  
603582726, 0.000375654078561, 0.000380707233207, 0.000385761299794, 0.000390815135468, 0  
.000395868344893, 0.00040092031494, 0.000405969973695, 0.000411016678824, 0.00041605945  
0828, 0.000421098831981, 0.000426134966405, 0.000431168360232, 0.000436198907483, 0.0004  
41225576564, 0.000446247751145, 0.000451264909939, 0.000456277439904, 0.000461285479878  
, 0.000466290268311, 0.000471292961951, 0.000476295199613, 0.000481306455196, 0.00048633  
919796, 0.000491406365154, 0.000496520750243, 0.000501725188809, 0.000506820300042, 0.00  
0511843799899, 0.000516805993249, 0.000521716495751, 0.000526584778827, 0.0005314152396  
17, 0.000536198331685, 0.00054092058444, 0.000545568260687, 0.000550126575567, 0.0005545  
51272334, 0.000559039130015, 0.000563550607789, 0.000568073046118, 0.000572594780043, 0.  
000577105128296, 0.000581597746218, 0.000586073539157, 0.000590534580146, 0.00059498358  
0029, 0.000599424164073, 0.000603858183416, 0.000608288351658, 0.000612715888147, 0.0006  
17142094475, 0.00062156668117, 0.000625988854174, 0.000630405803739, 0.000634814028335,  
0.000639210094011, 0.000643589141382, 0.000647948381455, 0.000652283804329, 0.000656592  
390851, 0.000660871048484, 0.000665117434947, 0.000669328424476, 0.000673502016767, 0.00  
0677635838806, 0.000681726423906, 0.000685771008447, 0.000689766557277, 0.0006937091815  
87, 0.000697596208494, 0.000701423634624, 0.000705187269252, 0.000708882598639, 0.000712  
504984938, 0.000716050097306, 0.000719516256947, 0.000722900815706, 0.000726200605444, 0  
.000729413154134, 0.000732535410123, 0.000735564924065, 0.000738499909916, 0.0007413390  
52654, 0.000744082181481, 0.000746728970984, 0.000749277147129, 0.000751724011976, 0.000  
754068275064, 0.000756309393139, 0.000758446263764, 0.000760477664656, 0.00076240139126



2, 0.000764215710654, 0.00076591886489, 0.0007675086016, 0.000768983492738, 0.0007703432  
86916, 0.000771587136481, 0.00077271459031, 0.000773724335036, 0.00077461618763, 0.00077  
53907765, 0.000776050192775, 0.000776594805937, 0.000777025627642, 0.000777343751399, 0.  
00077755055022, 0.00077764689124, 0.000777633375396, 0.000777511053072, 0.0007772814952  
76, 0.000776946008656, 0.00077650454978, 0.000775957442797, 0.000775306559356, 0.0007745  
52563537, 0.00077369688293, 0.000772741227948, 0.000771687700476, 0.000770538891872, 0.0  
00769296037375, 0.00076796126318, 0.000766536496804, 0.000765024306792, 0.0007634263543  
7, 0.000761744568883, 0.000759980519943, 0.000758135387987, 0.000756209387803, 0.0007542  
03324817, 0.000752118652892, 0.000749957123999, 0.000747719553038, 0.000745407388729, 0.  
000743021969612, 0.00074056509957, 0.000738038769088, 0.00073544534694, 0.0007327875878  
36, 0.00073006868741, 0.000727290421043, 0.000724454409417, 0.000721562727077, 0.0007186  
18314009, 0.000715623063673, 0.000712578902616, 0.000709487504616, 0.000706350126626, 0.  
000703167962813, 0.00069994209975, 0.000696673641937, 0.000693363915145, 0.000690014928  
687, 0.000686627718084, 0.000683202750551, 0.000679742269378, 0.000676247755756, 0.00067  
2721192352, 0.000669164254809, 0.000665578863174, 0.000661966413043, 0.000658328556473,  
0.000654666816458, 0.000650981117192, 0.000647273156982, 0.000643543775689, 0.000639793  
465947, 0.000636022193181, 0.000632230577762, 0.000628419007335, 0.00062458892073, 0.000  
620741406381, 0.000616877058634, 0.000612997549229, 0.000609105250369, 0.00060520123120  
4, 0.000601286790946, 0.000597363491152, 0.000593433461682, 0.000589497260399, 0.0005855  
55008765, 0.000581607204376, 0.00057765445198, 0.0005736970085, 0.000569734445208, 0.000  
565766305878, 0.000561792465344, 0.000557813856353, 0.000553829974223, 0.00054984162848  
9, 0.000545850164041, 0.000541856519787, 0.000537861444228, 0.000533865987843, 0.0005298  
72140507, 0.000525881640279, 0.000521895428389, 0.00051791351323, 0.000513935916306, 0.0  
00509964213816, 0.00050599936338, 0.000502041665253, 0.000498091673959, 0.0004941495919  
35, 0.000490214058254, 0.000486283621321, 0.000482358868449, 0.000478440532783, 0.000474  
530928537, 0.000470629025136, 0.000466733755832, 0.00046284449545, 0.000458961925409, 0.  
000455086035546, 0.000451217713963, 0.000447358687659, 0.000443509845862, 0.00043967099  
4054, 0.000435841611174, 0.000432021807532, 0.000428213115037, 0.000424416354495, 0.0004  
20631183956, 0.000416857607894, 0.000413096773593, 0.000409348757806, 0.000405613575698  
, 0.000401891739428, 0.0003981827751, 0.000394487150043, 0.000390805354638, 0.0003871376  
77827, 0.000383484711562, 0.00037984801505, 0.00037622698005, 0.000372620938852, 0.00036  
9029932884, 0.000365454313345, 0.00036189465936, 0.000358351238711, 0.000354823070767, 0  
.000351309466443, 0.000347810311358, 0.000344324846317, 0.000340852831336, 0.0003373950  
75074, 0.000333951864092, 0.000330522472268, 0.000327105813899, 0.000323701279633, 0.000  
320310157741, 0.000316933830885, 0.000313571939081, 0.000310224865045, 0.00030689230656  
5, 0.000303573212655, 0.000300266179029, 0.000296971291141, 0.000293688603125, 0.0002904  
19039517, 0.000287161429469, 0.000283914054596, 0.000280676427307, 0.000277447593508, 0.  
000274227896977, 0.0002710179685, 0.000267817727937, 0.000264627801824, 0.0002614482961  
25, 0.000258279090746, 0.000255119468394, 0.000251970263561, 0.000248831343935, 0.000245  
702288472, 0.000242582619093, 0.000239470558902, 0.000236365987782, 0.000233268590551, 0  
.000230177837635, 0.00022709290154, 0.000224013410042, 0.000220938620497, 0.00021786792  
0611, 0.000214801577035, 0.000211740076535, 0.000208684070891, 0.000205633947485, 0.0002  
02588097788, 0.000199547224732, 0.00019651056106, 0.000193478064849, 0.000190449096544,  
0.00018742381839, 0.000184402619549, 0.000181384191621, 0.000178367651954, 0.0001753525  
32306, 0.00017233858056, 0.000169325791511, 0.000166313283887, 0.000163301246765, 0.0001  
60289285875, 0.000157277093603, 0.000154264271642, 0.000151250285527, 0.000148235808221  
, 0.000145220507511, 0.000142205320321, 0.00013918982558, 0.000136174505243, 0.000133159  
615759, 0.000130145124054, 0.000127132052962, 0.000124120846938, 0.00012111203243, 0.000  
11810592129, 0.000115102162305, 0.000112100819346, 0.000109100875086, 0.000106101806707  
, 0.000103102688851, 0.000100102535006, 9.71003671797e-05, 9.40940685418e-  
05, 9.10815304298e-05, 8.8061113353e-05, 8.50316440039e-05, 8.19912759664e-  
05, 7.89396712003e-05, 7.58764766419e-05, 7.280136707e-05, 6.97149295144e-  
05, 6.66177371055e-05, 6.35102981159e-05, 6.03942873567e-05, 5.72717879723e-  
05, 5.41445102748e-05, 5.10141321806e-05, 4.78820168752e-05, 4.47489868852e-  
05, 4.16160868079e-05, 3.8484853976e-05, 3.53551125593e-05, 3.22273239761e-  
05, 2.91016624598e-05, 2.5977212461e-05, 2.28531712134e-05, 1.97289987157e-  
05, 1.66046366318e-05, 1.34806240354e-05, 1.03573097331e-05, 7.23386274742e-  
06, 4.11006727192e-06, 9.86553930425e-07, -2.13618884061e-06, -5.25628189377e-06, -  
8.37206013265e-06, -1.14824632601e-05, -1.45876399986e-05, -1.76870063742e-05, -

2.07806909352e-05, -2.38681198238e-05, -2.69474557225e-05, -3.0018295695e-05, -  
3.30800281115e-05, -3.61335315097e-05, -3.9179429674e-05, -4.22182084849e-05, -  
4.52487696627e-05, -4.82704229861e-05, -5.12823268693e-05, -5.42830921415e-05, -  
5.7272912296e-05, -6.02520360613e-05, -6.32204164118e-05, -6.61775276466e-05, -  
6.91216589564e-05, -7.20524568779e-05, -7.49689472947e-05, -7.78707802699e-05, -  
8.07574732297e-05, -8.36294786518e-05, -8.64872452939e-05, -8.93302524195e-05, -  
9.21574233732e-05, -9.49678012377e-05, -9.77618233408e-05, -0.000100539400241, -  
0.000103300596098, -0.000106045278179, -0.00010877376917, -0.000111485634078, -  
0.000114180187584, -0.000116856877475, -0.000119515805622, -0.000122157348256, -  
0.000124781357384, -0.00012738574686, -0.000129971293059, -0.000132537907316, -  
0.000135085747811, -0.000137614751028, -0.000140125025715, -0.000142617394608, -  
0.000145091002403, -0.000147545762587, -0.000149982155134, -0.000152401803971, -  
0.00015480592965, -0.000157193977669, -0.00015956615253, -0.000161922695446, -  
0.000164263746087, -0.000166589577192, -0.000168900824794, -0.000171198582486, -  
0.000173483095721, -0.000175754576803, -0.000178011186183, -0.000180252989244, -  
0.000182479118057, -0.000184689164689, -0.000186884102073, -0.000189062804253, -  
0.000191225445587, -0.000193370338803, -0.000195497804435, -0.000197607124382, -  
0.000199698210046, -0.000201772446151, -0.00020383077, -0.000205874499606, -  
0.000207903415691, -0.00020991624229, -0.000211914315139, -0.000213897947143, -  
0.000215868104029, -0.00021782481267, -0.000219768558884, -0.000221699403534, -  
0.000223617005355, -0.000225520530954, -0.000227408887769, -0.000229284315758, -  
0.000231146158707, -0.000232995258055, -0.000234830435777, -0.00023665149851, -  
0.000238458769443, -0.00024025217276, -0.000242031069699, -0.00024379578387, -  
0.000245547284018, -0.000247285204838, -0.000249008829149, -0.00025071887038, -  
0.000252414049073, -0.000254094029933, -0.000255759599454, -0.000257409778738, -  
0.000259045984968, -0.000260668162271, -0.000262275748994, -0.000263868674246, -  
0.000265447530079, -0.000267011597979, -0.00026856104085, -0.000270097590238, -  
0.000271621694995, -0.000273134353385, -0.000274636029823, -0.000276125971337, -  
0.000277605044955, -0.000279073476076, -0.000280531096061, -0.000281978369501, -  
0.000283416205348, -0.000284844475899, -0.000286261955159, -0.000287667951777, -  
0.000289060970295, -0.000290441365844, -0.000291808888455, -0.00029316278728, -  
0.000294503569875, -0.000295830936685, -0.00029714489922, -0.000298445332162, -  
0.000299734108729, -0.000301011215231, -0.000302277696156, -0.000303532742577, -  
0.000304776243582, -0.000306009489414, -0.000307232964554, -0.000308446353371, -  
0.000309650064556, -0.00031084402331, -0.00031202578511, -0.000313194953624, -  
0.000314352332817, -0.000315499098329, -0.000316636247364, -0.000317762951858, -  
0.000318878888159, -0.000319984336506, -0.000321079076117, -0.000322162914097, -  
0.000323236452859, -0.000324300934368, -0.000325354293012, -0.000326395787652, -  
0.00032742470214, -0  
.000328440799757, -0.000329443409248, -0.000330430875, -0.000331401907171, -  
0.000332356505218, -0.000333295001093, -0.000334216753345, -0.000335123100497, -  
0.000336015623591, -0.000336893885709, -0.000337757859658, -0.000338608935334, -  
0.000339448655072, -0.000340278952885, -0.000341100650431, -0.000341913428267, -  
0.000342716641353, -0.000343510313349, -0.000344292844428, -0.000345063942346, -  
0.000345823943206, -0.000346572596844, -0.000347308430896, -0.000348030831031, -  
0.000348738253055, -0.000349431184705, -0.000350109812135, -0.000350773590726, -  
0.000351422800956, -0.000352057914035, -0.00035267799813, -0.000353281871712, -  
0.000353869368535, -0.000354441435499, -0.000354997909025, -0.000355538616248, -  
0.00035606404525, -0.000356573848746, -0.000357068220492, -0.00035754619172, -  
0.000358007637152, -0.00035845322808, -0.000358884813365, -0.000359300745766, -  
0.000359699644065, -0.000360081342119, -0.000360444020413, -0.000360787017851, -  
0.000361110305514, -0.00036141349764, -0.000361697383087, -0.000361960629317, -  
0.000362202035185, -0.000362421182933, -0.000362620033505, -0.000362798122256, -  
0.00036295591569, -0.00036309473516, -0.000363214610732, -0.000363316071968, -  
0.00036339877262, -0.000363462491588, -0.000363508055774, -0.000363534831871, -  
0.000363541562594, -0.000363527207197, -0.000363492641558, -0.000363437691779, -  
0.000363360432424, -0.000363259852417, -0.000363135343286, -0.000362987630301, -  
0.000362816520788, -0.000362622097729, -0.00036240604404, -0.000362169160647, -  
0.00036191225068, -0.000361633576159, -0.000361333733379, -0.000361013672289, -

0.00036067358738, -0.000360311458306, -0.000359926636466, -0.000359519282498, -  
0.000359087426894, -0.000358630448342, -0.000358145602316, -0.000357632883084, -  
0.000357092833541, -0.000356524670199, -0.000355928517666, -0.00035530693302, -  
0.000354660072933, -0.000353989020851, -0.000353293336448, -0.000352574842809, -  
0.000351835781838, -0.000351076905312, -0.000350299089145, -0.000349503520486, -  
0.000348691150757, -0.000347861548137, -0.000347014776901, -0.000346152073457, -  
0.000345273298414, -0.000344378403958, -0.000343466561421, -0.000342536529395, -  
0.000341590405003, -0.000340627273863, -0.000339648859109, -0.000338655070879, -  
0.000337647271812, -0.000336722794338, -0.000335981907802, -0.000335423803254, -  
0.000335049972578, -0.000334863106957)  
xcorr <- c(-600.0, -598.999165972, -597.998331943, -596.997497915, -595.996663887, -  
594.995829858, -593.99499583, -592.994161802, -591.993327773, -590.992493745, -  
589.991659716, -588.990825688, -587.98999166, -586.989157631, -585.988323603, -  
584.987489575, -583.986655546, -582.985821518, -581.98498749, -580.984153461, -  
579.983319433, -578.982485405, -577.981651376, -576.980817348, -575.979983319, -  
574.979149291, -573.978315263, -572.977481234, -571.976647206, -570.975813178, -  
569.974979149, -568.974145121, -567.973311093, -566.972477064, -565.971643036, -  
564.970809008, -563.969974979, -562.969140951, -561.968306922, -560.967472894, -  
559.966638866, -558.965804837, -557.964970809, -556.964136781, -555.963302752, -  
554.962468724, -553.961634696, -552.960800667, -551.959966639, -550.959132611, -  
549.958298582, -548.957464554, -547.956630525, -546.955796497, -545.954962469, -  
544.95412844, -543.953294412, -542.952460384, -541.951626355, -540.950792327, -  
539.949958299, -538.94912427, -537.948290242, -536.947456214, -535.946622185, -  
534.945788157, -533.944954128, -532.9441201, -531.943286072, -530.942452043, -  
529.941618015, -528.940783987, -527.939949958, -526.93911593, -525.938281902, -  
524.937447873, -523.936613845, -522.935779817, -521.934945788, -520.93411176, -  
519.933277731, -518.932443703, -517.931609675, -516.930775646, -515.929941618, -  
514.92910759, -513.928273561, -512.927439533, -511.926605505, -510.925771476, -  
509.924937448, -508.92410342, -507.923269391, -506.922435363, -505.921601334, -  
504.920767306, -503.919933278, -502.919099249, -501.918265221, -500.917431193, -  
499.916597164, -498.915763136, -497.914929108, -496.914095079, -495.913261051, -  
494.912427023, -493.911592994, -492.910758966, -491.909924937, -490.909090909, -  
489.908256881, -488.907422852, -487.906588824, -486.905754796, -485.904920767, -  
484.904086739, -483.903252711, -482.902418682, -481.901584654, -480.900750626, -  
479.899916597, -478.899082569, -477.89824854, -476.897414512, -475.896580484, -  
474.895746455, -473.894912427, -472.894078399, -471.89324437, -470.892410342, -  
469.891576314, -468.890742285, -467.889908257, -466.889074229, -465.8882402, -  
464.887406172, -463.886572143, -462.885738115, -461.884904087, -460.884070058, -  
459.88323603, -458.882402002, -457.881567973, -456.880733945, -455.879899917, -  
454.879065888, -453.87823186, -452.877397832, -451.876563803, -450.875729775, -  
449.874895746, -448.874061718, -447.87322769, -446.872393661, -445.871559633, -  
444.870725605, -443.869891576, -442.869057548, -441.86822352, -440.867389491, -  
439.866555463, -438.865721435, -437.864887406, -436.864053378, -435.863219349, -  
434.862385321, -433.861551293, -432.860717264, -431.859883236, -430.859049208, -  
429.858215179, -428.857381151, -427.856547123, -426.855713094, -425.854879066, -  
424.854045038, -423.853211009, -422.852376981, -421.851542952, -420.850708924, -  
419.849874896, -418.849040867, -417.848206839, -416.847372811, -415.846538782, -  
414.845704754, -413.844870726, -412.844036697, -411.843202669, -410.842368641, -  
409.841534612, -408.840700584, -407.839866555, -406.839032527, -405.838198499, -  
404.83736447, -403.836530442, -402.835696414, -401.834862385, -400.834028357, -  
399.833194329, -398.8323603, -397.831526272, -396.830692244, -395.829858215, -  
394.829024187, -393.828190158, -392.82735613, -391.826522102, -390.825688073, -  
389.824854045, -388.824020017, -387.823185988, -386.82235196, -385.821517932, -  
384.820683903, -383.819849875, -382.819015847, -381.818181818, -380.81734779, -  
379.816513761, -378.815679733, -377.814845705, -376.814011676, -375.813177648, -  
374.81234362, -373.811509591, -372.810675563, -371.809841535, -370.809007506, -  
369.808173478, -368.80733945, -367.806505421, -366.805671393, -365.804837364, -  
364.804003336, -363.803169308, -362.802335279, -361.801501251, -360.800667223, -  
359.799833194, -358.798999166, -357.798165138, -356.797331109, -355.796497081, -

354.795663053, -353.794829024, -352.793994996, -351.793160967, -350.792326939, -  
349.791492911, -348.790658882, -347.789824854, -346.788990826, -345.788156797, -  
344.787322769, -343.786488741, -342.785654712, -341.784820684, -340.783986656, -  
339.783152627, -338.782318599, -337.78148457, -336.780650542, -335.779816514, -  
334.778982485, -333.778148457, -332.777314429, -331.7764804, -330.775646372, -  
329.774812344, -328.773978315, -327.773144287, -326.772310259, -325.77147623, -  
324.770642202, -323.769808173, -322.768974145, -321.768140117, -320.767306088, -  
319.76647206, -318.765638032, -317.764804003, -316.763969975, -315.763135947, -  
314.762301918, -313.76146789, -312.760633862, -311.759799833, -310.758965805, -  
309.758131776, -308.757297748, -307.75646372, -306.755629691, -305.754795663, -  
304.753961635, -303.753127606, -302.752293578, -301.75145955, -300.750625521, -  
299.749791493, -298.748957465, -297.748123436, -296.747289408, -295.746455379, -  
294.745621351, -293.744787323, -292.743953294, -291.743119266, -290.742285238, -  
289.741451209, -288.740617181, -287.739783153, -286.738949124, -285.738115096, -  
284.737281068, -283.736447039, -282.735613011, -281.734778982, -280.733944954, -  
279.733110926, -278.732276897, -277.731442869, -276.730608841, -275.729774812, -  
274.728940784, -273.728106756, -272.727272727, -271.726438699, -270.725604671, -  
269.724770642, -268.723936614, -267.723102585, -266.722268557, -265.721434529, -  
264.7206005, -263.719766472, -262.718932444, -261.718098415, -260.717264387, -  
259.716430359, -258.71559633, -257.714762302, -256.713928274, -255.713094245, -  
254.712260217, -253.711426188, -252.71059216, -251.709758132, -250.708924103, -  
249.708090075, -248.707256047, -247.706422018, -246.70558799, -245.704753962, -  
244.703919933, -243.703085905, -242.702251877, -241.701417848, -240.70058382, -  
239.699749791, -238.698915763, -237.698081735, -236.697247706, -235.696413678, -  
234.69557965, -233.694745621, -232.693911593, -231.693077565, -230.692243536, -  
229.691409508, -228.69057548, -227.689741451, -226.688907423, -225.688073394, -  
224.687239366, -223.686405338, -222.685571309, -221.684737281, -220.683903253, -  
219.683069224, -218.682235196, -217.681401168, -216.680567139, -215.679733111, -  
214.678899083, -213.678065054, -212.677231026, -211.676396997, -210.675562969, -  
209.674728941, -208.673894912, -207.673060884, -206.672226856, -205.671392827, -  
204.670558799, -203.669724771, -202.668890742, -201.668056714, -200.667222686, -  
199.666388657, -198.665554629, -197.664720601, -196.663886572, -195.663052544, -  
194.662218515, -193.661384487, -192.660550459, -191.65971643, -190.658882402, -  
189.658048374, -188.657214345, -187.656380317, -186.655546289, -185.65471226, -  
184.653878232, -183.653044204, -182.652210175, -181.651376147, -180.650542118, -  
179.64970809, -178.648874062, -177.648040033, -176.647206005, -175.646371977, -  
174.645537948, -173.64470392, -172.643869892, -171.643035863, -170.642201835, -  
169.641367807, -168.640533778, -167.63969975, -166.638865721, -165.638031693, -  
164.637197665, -163.636363636, -162.635529608, -161.63469558, -160.633861551, -  
159.633027523, -158.632193495, -157.631359466, -156.630525438, -155.62969141, -  
154.628857381, -153.628023353, -152.627189324, -151.626355296, -150.625521268, -  
149.624687239, -148.623853211, -147.623019183, -146.622185154, -145.621351126, -  
144.620517098, -143.619683069, -142.618849041, -141.618015013, -140.617180984, -  
139.616346956, -138.615512927, -137.614678899, -136.613844871, -135.613010842, -  
134.612176814, -133.611342786, -132.610508757, -131.609674729, -130.608840701, -  
129.608006672, -128.607172644, -127.606338616, -126.605504587, -125.604670559, -  
124.60383653, -123.603002502, -122.602168474, -121.601334445, -120.600500417, -  
119.599666389, -118.59883236, -117.597998332, -116.597164304, -115.596330275, -  
114.595496247, -113.594662219, -112.59382819, -111.592994162, -110.592160133, -  
109.591326105, -108.590492077, -107.589658048, -106.58882402, -105.587989992, -  
104.587155963, -103.586321935, -102.585487907, -101.584653878, -100.58381985, -  
99.5829858215, -98.5821517932, -97.5813177648, -96.5804837364, -95.5796497081, -  
94.5788156797, -93.5779816514, -92.577147623, -91.5763135947, -90.5754795663, -  
89.5746455379, -88.5738115096, -87.5729774812, -86.5721434529, -85.5713094245, -  
84.5704753962, -83.5696413678, -82.5688073394, -81.5679733111, -80.5671392827, -  
79.5663052544, -78.565471226, -77.5646371977, -76.5638031693, -75.562969141, -  
74.5621351126, -73.5613010842, -72.5604670559, -71.5596330275, -70.5587989992, -  
69.5579649708, -68.5571309425, -67.5562969141, -66.5554628857, -65.5546288574, -  
64.553794829, -63.5529608007, -62.5521267723, -61.551292744, -60.5504587156, -

59.5496246872, -58.5487906589, -57.5479566305, -56.5471226022, -55.5462885738, -  
54.5454545455, -53.5446205171, -52.5437864887, -51.5429524604, -50.542118432, -  
49.5412844037, -48.5404503753, -47.539616347, -46.5387823186, -45.5379482902, -  
44.5371142619, -43.5362802335, -42.5354462052, -41.5346121768, -40.5337781485, -  
39.5329441201, -38.5321100917, -37.5312760634, -36.530442035, -35.5296080067, -  
34.5287739783, -33.52793995, -32.5271059216, -31.5262718932, -30.5254378649, -  
29.5246038365, -28.5237698082, -27.5229357798, -26.5221017515, -25.5212677231, -  
24.5204336947, -23.5195996664, -22.518765638, -21.5179316097, -20.5170975813, -  
19.516263553, -18.5154295246, -17.5145954962, -16.5137614679, -15.5129274395, -  
14.5120934112, -13.5112593828, -12.5104253545, -11.5095913261, -10.5087572977, -  
9.50792326939, -8.50708924103, -7.50625521268, -6.50542118432, -5.50458715596, -  
4.50375312761, -3.50291909925, -2.50208507089, -1.50125104254, -  
0.500417014179, 0.500417014178, 1.50125104254, 2.50208507089, 3.50291909925, 4.503753127  
61, 5.50458715596, 6.50542118432, 7.50625521268, 8.50708924103, 9.50792326939, 10.5087572  
977, 11.5095913261, 12.5104253545, 13.5112593828, 14.5120934112, 15.5129274395, 16.513761  
4679, 17.5145954962, 18.5154295246, 19.516263553, 20.5170975813, 21.5179316097, 22.518765  
638, 23.5195996664, 24.5204336947, 25.5212677231, 26.5221017515, 27.5229357798, 28.523769  
8082, 29.5246038365, 30.5254378649, 31.5262718932, 32.5271059216, 33.52793995, 34.5287739  
783, 35.5296080067, 36.530442035, 37.5312760634, 38.5321100917, 39.5329441201, 40.5337781  
485, 41.5346121768, 42.5354462052, 43.5362802335, 44.5371142619, 45.5379482902, 46.538782  
3186, 47.539616347, 48.5404503753, 49.5412844037, 50.542118432, 51.5429524604, 52.5437864  
887, 53.5446205171, 54.5454545455, 55.5462885738, 56.5471226022, 57.5479566305, 58.548790  
6589, 59.5496246872, 60.5504587156, 61.551292744, 62.5521267723, 63.5529608007, 64.553794  
829, 65.5546288574, 66.5554628857, 67.5562969141, 68.5571309425, 69.5579649708, 70.558798  
9992, 71.5596330275, 72.5604670559, 73.5613010842, 74.5621351126, 75.562969141, 76.5638  
031693, 77.5646371977, 78.565471226, 79.5663052544, 80.5671392827, 81.5679733111, 82.5688  
073394, 83.5696413678, 84.5704753962, 85.5713094245, 86.5721434529, 87.5729774812, 88.573  
8115096, 89.5746455379, 90.5754795663, 91.5763135947, 92.577147623, 93.5779816514, 94.578  
8156797, 95.5796497081, 96.5804837364, 97.5813177648, 98.5821517932, 99.5829858215, 100.5  
8381985, 101.584653878, 102.585487907, 103.586321935, 104.587155963, 105.587989992, 106.5  
8882402, 107.589658048, 108.590492077, 109.591326105, 110.592160133, 111.592994162, 112.5  
9382819, 113.594662219, 114.595496247, 115.596330275, 116.597164304, 117.597998332, 118.5  
9883236, 119.599666389, 120.600500417, 121.601334445, 122.602168474, 123.603002502, 124.6  
0383653, 125.604670559, 126.605504587, 127.606338616, 128.607172644, 129.608006672, 130.6  
08840701, 131.609674729, 132.610508757, 133.611342786, 134.612176814, 135.613010842, 136.  
613844871, 137.614678899, 138.615512927, 139.616346956, 140.617180984, 141.618015013, 142  
.618849041, 143.619683069, 144.620517098, 145.621351126, 146.622185154, 147.623019183, 14  
8.623853211, 149.624687239, 150.625521268, 151.626355296, 152.627189324, 153.628023353, 1  
54.628857381, 155.62969141, 156.630525438, 157.631359466, 158.632193495, 159.633027523, 1  
60.633861551, 161.63469558, 162.635529608, 163.636363636, 164.637197665, 165.638031693, 1  
66.638865721, 167.63969975, 168.640533778, 169.641367807, 170.642201835, 171.643035863, 1  
72.643869892, 173.64470392, 174.645537948, 175.646371977, 176.647206005, 177.648040033, 1  
78.648874062, 179.64970809, 180.650542118, 181.651376147, 182.652210175, 183.653044204, 1  
84.653878232, 185.65471226, 186.655546289, 187.656380317, 188.657214345, 189.658048374, 1  
90.658882402, 191.65971643, 192.660550459, 193.661384487, 194.662218515, 195.663052544, 1  
96.663886572, 197.664720601, 198.665554629, 199.666388657, 200.667222686, 201.668056714,  
202.668890742, 203.669724771, 204.670558799, 205.671392827, 206.672226856, 207.673060884  
, 208.673894912, 209.674728941, 210.675562969, 211.676396997, 212.677231026, 213.67806505  
4, 214.678899083, 215.679733111, 216.680567139, 217.681401168, 218.682235196, 219.6830692  
24, 220.683903253, 221.684737281, 222.685571309, 223.686405338, 224.687239366, 225.688073  
394, 226.688907423, 227.689741451, 228.69057548, 229.691409508, 230.692243536, 231.693077  
565, 232.693911593, 233.694745621, 234.69557965, 235.696413678, 236.697247706, 237.698081  
735, 238.698915763, 239.699749791, 240.70058382, 241.701417848, 242.702251877, 243.703085  
905, 244.703919933, 245.704753962, 246.70558799, 247.706422018, 248.707256047, 249.708090  
075, 250.708924103, 251.709758132, 252.71059216, 253.711426188, 254.712260217, 255.713094  
245, 256.713928274, 257.714762302, 258.71559633, 259.716430359, 260.717264387, 261.718098  
415, 262.718932444, 263.719766472, 264.72060005, 265.721434529, 266.722268557, 267.7231025  
85, 268.723936614, 269.724770642, 270.725604671, 271.726438699, 272.727272727, 273.728106  
756, 274.728940784, 275.729774812, 276.730608841, 277.731442869, 278.732276897, 279.73311

0926, 280.733944954, 281.734778982, 282.735613011, 283.736447039, 284.737281068, 285.738115096, 286.738949124, 287.739783153, 288.740617181, 289.741451209, 290.742285238, 291.743119266, 292.743953294, 293.744787323, 294.745621351, 295.746455379, 296.747289408, 297.748123436, 298.748957465, 299.749791493, 300.750625521, 301.75145955, 302.752293578, 303.753127606, 304.753961635, 305.754795663, 306.755629691, 307.75646372, 308.757297748, 309.758131776, 310.758965805, 311.759799833, 312.760633862, 313.76146789, 314.762301918, 315.763135947, 316.763969975, 317.764804003, 318.765638032, 319.76647206, 320.767306088, 321.768140117, 322.768974145, 323.769808173, 324.770642202, 325.77147623, 326.772310259, 327.773144287, 328.773978315, 329.774812344, 330.775646372, 331.7764804, 332.777314429, 333.778148457, 334.778982485, 335.779816514, 336.780650542, 337.78148457, 338.782318599, 339.783152627, 340.783986656, 341.784820684, 342.785654712, 343.786488741, 344.787322769, 345.788156797, 346.788990826, 347.789824854, 348.790658882, 349.791492911, 350.792326939, 351.793160967, 352.793994996, 353.794829024, 354.795663053, 355.796497081, 356.797331109, 357.798165138, 358.798999166, 359.799833194, 360.800667223, 361.801501251, 362.802335279, 363.803169308, 364.804003336, 365.804837364, 366.805671393, 367.806505421, 368.80733945, 369.808173478, 370.809007506, 371.809841535, 372.810675563, 373.811509591, 374.81234362, 375.813177648, 376.814011676, 377.814845705, 378.815679733, 379.816513761, 380.81734779, 381.818181818, 382.819015847, 383.819849875, 384.820683903, 385.821517932, 386.82235196, 387.823185988, 388.824020017, 389.824854045, 390.825688073, 391.826522102, 392.82735613, 393.828190158, 394.829024187, 395.829858215, 396.830692244, 397.831526272, 398.8323603, 399.833194329, 400.834028357, 401.834862385, 402.835696414, 403.836530442, 404.83736447, 405.838198499, 406.839032527, 407.839866555, 408.840700584, 409.841534612, 410.842368641, 411.843202669, 412.844036697, 413.844870726, 414.845704754, 415.846538782, 416.847372811, 417.848206839, 418.849040867, 419.849874896, 420.850708924, 421.851542952, 422.852376981, 423.853211009, 424.854045038, 425.854879066, 426.855713094, 427.856547123, 428.857381151, 429.858215179, 430.859049208, 431.859883236, 432.860717264, 433.861551293, 434.862385321, 435.863219349, 436.864053378, 437.864887406, 438.865721435, 439.866555463, 440.867389491, 441.86822352, 442.869057548, 443.869891576, 444.870725605, 445.871559633, 446.872393661, 447.87322769, 448.874061718, 449.874895746, 450.875729775, 451.876563803, 452.877397832, 453.87823186, 454.879065888, 455.879899917, 456.880733945, 457.881567973, 458.882402002, 459.88323603, 460.884070058, 461.884904087, 462.885738115, 463.886572143, 464.887406172, 465.8882402, 466.889074229, 467.889908257, 468.890742285, 469.891576314, 470.892410342, 471.89324437, 472.894078399, 473.894912427, 474.895746455, 475.896580484, 476.897414512, 477.89824854, 478.899082569, 479.899916597, 480.900750626, 481.901584654, 482.902418682, 483.903252711, 484.904086739, 485.904920767, 486.905754796, 487.906588824, 488.907422852, 489.908256881, 490.909090909, 491.909924937, 492.910758966, 493.911592994, 494.912427023, 495.913261051, 496.914095079, 497.914929108, 498.915763136, 499.916597164, 500.917431193, 501.918265221, 502.919099249, 503.919933278, 504.920767306, 505.921601334, 506.922435363, 507.923269391, 508.92410342, 509.924937448, 510.925771476, 511.926605505, 512.927439533, 513.928273561, 514.92910759, 515.929941618, 516.930775646, 517.931609675, 518.932443703, 519.933277731, 520.93411176, 521.934945788, 522.935779817, 523.936613845, 524.937447873, 525.938281902, 526.93911593, 527.939949958, 528.940783987, 529.941618015, 530.942452043, 531.943286072, 532.9441201, 533.944954128, 534.945788157, 535.946622185, 536.947456214, 537.948290242, 538.94912427, 539.949958299, 540.950792327, 541.951626355, 542.952460384, 543.953294412, 544.95412844, 545.954962469, 546.955796497, 547.956630525, 548.957464554, 549.958298582, 550.959132611, 551.959966639, 552.960800667, 553.961634696, 554.962468724, 555.963302752, 556.964136781, 557.964970809, 558.965804837, 559.966638866, 560.967472894, 561.968306922, 562.969140951, 563.969974979, 564.970809008, 565.971643036, 566.972477064, 567.973311093, 568.974145121, 569.974979149, 570.975813178, 571.976647206, 572.977481234, 573.978315263, 574.979149291, 575.979983319, 576.980817348, 577.981651376, 578.982485405, 579.983319433, 580.984153461, 581.98498749, 582.985821518, 583.986655546, 584.987489575, 585.988323603, 586.989157631, 587.98999166, 588.990825688, 589.991659716, 590.992493745, 591.993327773, 592.994161802, 593.99499583, 594.995829858, 595.996663887, 596.997497915, 597.998331943, 598.999165972, 600.0)

```
altd <- c(76)
x <- seq.int((length(p)-1)/2*-1, (length(p)-1)/2)
pdf('jd_sorted_mdup_model.pdf', height=6, width=6)
plot(x, p, type='l', col=c('red'), main='Peak Model', xlab='Distance to the middle', ylab='Percentage')
```

```
lines(x,m,col=c('blue'))
legend('topleft',c('forward tags','reverse tags'),lty=c(1,1,1),col=c('red','blue'))
plot(xcorr,ycorr,type='l',col=c('black'),main='Cross-Correlation',xlab='Lag between
+ and - tags',ylab='Correlation')
abline(v=altd,lty=2,col=c('red'))
legend('topleft','alternative lag(s)',lty=2,col='red')
legend('right','alt lag(s) : 76',bty='n')
dev.off()
```

```
==> ./sanchari/j455/runMac2.sh <==
```

```
#!/bin/bash
#$ -cwd
#$ -N macs2
#$ -j n
#$ -l h_vmem=9.8G
#$ -pe smp 1
#$ -S /bin/bash
#$ -m e
#$ -M kith.pradhan@einstein.yu.edu
```

```
#run mac2 peak finding software on a single target bam
#usually we need a control file, igg or input
#
#usage:
#qsub runMac2.sh bamfile.bam
```

```
BAM1=$1
BAM2=$2
NAME=C${BAM1%. *} _T${BAM2%. *}
FOL=macs_${NAME}
```

```
#module load MACS2/2.1.0/python.2.7.8
module load MACS2/2.1.0-update/python.2.7.8
```

```
echo $BAM1
echo $BAM2
echo $NAME
echo $FOL
```

```
macs2 callpeak -f BAMPE -c $BAM1 -t $BAM2 -n $NAME --outdir $FOL --verbose 3
```

```
==> ./sanchari/j455/dl1.sh <==
```

```
wget http://waspsystem.einstein.yu.edu/wsfile/get/file/F8393993-BB15-4027-A8F5-
F8DAFCB5D824/J455_BC8P19ACXX_Lane4_AGGCAGAA-CTCTCTAT_HPNE.1_val_1.fq.gz
wget http://waspsystem.einstein.yu.edu/wsfile/get/file/DCEE1D23-B598-44EE-83D0-
5C5EBEC8E437/J455_BC8P19ACXX_Lane4_AGGCAGAA-CTCTCTAT_HPNE.2_val_2.fq.gz
wget http://waspsystem.einstein.yu.edu/wsfile/get/file/E584F273-7DC8-4250-B1AF-
E72F74A920D6/J455_BC8P19ACXX_Lane4_TCCTGAGC-AGAGTAGA_JD13D.1_val_1.fq.gz
wget http://waspsystem.einstein.yu.edu/wsfile/get/file/45C3D671-AE99-42BE-B947-
02F97404AADD/J455_BC8P19ACXX_Lane4_TCCTGAGC-AGAGTAGA_JD13D.2_val_2.fq.gz
wget http://waspsystem.einstein.yu.edu/wsfile/get/file/82E79983-BD9E-4047-8650-
A332197E5AEA/J455_BC8P19ACXX_Lane4_AGGCAGAA-CTCTCTAT_HPNE.1_val_1_fastqc.html
wget http://waspsystem.einstein.yu.edu/wsfile/get/file/AABF0427-112C-49A0-A87A-
0F4F1BBED9FF/J455_BC8P19ACXX_Lane4_AGGCAGAA-CTCTCTAT_HPNE.2_val_2_fastqc.html
wget http://waspsystem.einstein.yu.edu/wsfile/get/file/9352EF19-6099-4513-8E90-
FB658070C563/J455_BC8P19ACXX_Lane4_TCCTGAGC-AGAGTAGA_JD13D.1_val_1_fastqc.html
wget http://waspsystem.einstein.yu.edu/wsfile/get/file/E8FA916F-7A70-41EE-898A-
EB9A32E0FE1F/J455_BC8P19ACXX_Lane4_TCCTGAGC-AGAGTAGA_JD13D.2_val_2_fastqc.html
wget http://waspsystem.einstein.yu.edu/wsfile/get/file/A251EADA-1529-4880-B63E-
```

```
6E616A5D76D3/J455_BC8P19ACXX_Lane4_AGGCAGAA-CTCTCTAT_HPNE.1_val_1_screen.png
wget http://waspsystem.einstein.yu.edu/wsfile/get/file/2C00DBA4-EAE5-4357-877C-
8629BA783269/J455_BC8P19ACXX_Lane4_TCCTGAGC-AGAGTAGA_JD13D.1_val_1_screen.png
```

```
==> ./sanchari/j455/commands1.sh <==
```

```
qsub runBowtie.sh hpne J455_BC8P19ACXX_Lane4_AGGCAGAA-CTCTCTAT_HPNE.1_val_1.fq.gz
J455_BC8P19ACXX_Lane4_AGGCAGAA-CTCTCTAT_HPNE.2_val_2.fq.gz
```

```
qsub runBowtie.sh jd J455_BC8P19ACXX_Lane4_TCCTGAGC-AGAGTAGA_JD13D.1_val_1.fq.gz
J455_BC8P19ACXX_Lane4_TCCTGAGC-AGAGTAGA_JD13D.2_val_2.fq.gz
```

```
SNAME=hpne
```

```
FQ1=J455_BC8P19ACXX_Lane4_AGGCAGAA-CTCTCTAT_HPNE.1_val_1.fq.gz
```

```
FQ2=J455_BC8P19ACXX_Lane4_AGGCAGAA-CTCTCTAT_HPNE.2_val_2.fq.gz
```

```
REF=../../hg19/hg19
```

```
qsub runMacs.sh hpne_sorted_mdup.bam
```

```
qsub runMacs.sh jd_sorted_mdup.bam
```

```
qsub runMacs2.sh jd_sorted_mdup.bam hpne_sorted_mdup.bam
```

```
qsub runMacs2.sh hpne_sorted_mdup.bam jd_sorted_mdup.bam
```

```
==> ./sanchari/j455/runBowtie.sh <==
```

```
#!/bin/bash
```

```
#$ -cwd
```

```
#$ -N bowtie_alignment
```

```
#$ -j n
```

```
#$ -l h_vmem=5.8G
```

```
#$ -pe smp 2
```

```
#$ -S /bin/bash
```

```
#$ -m e
```

```
#$ -M kith.pradhan@einstein.yu.edu
```

```
#process a pair of fastqs
```

```
#
```

```
#usage:
```

```
#qsub runBowtie.sh aligned_name reads1.fastq.gz reads2.fastq.gz
```

```
SNAME=$1
```

```
FQ1=$2
```

```
FQ2=$3
```

```
REF=../../hg19/hg19
```

```
module load bowtie2/2.2.3/gcc.4.4.7
```

```
module load samtools/1.2/gcc.4.4.7
```

```
module load picard-tools/1.92/java.1.8.0_20
```

```
bowtie2 -t -p 2 -q --local -x $REF -1 <(zcat $FQ1) -2 <(zcat $FQ2) 2>| summary_$
```

```
{SNAME}.txt | samtools view -bS - >| ${SNAME}.bam
```

```
java -jar $(which SortSam.jar) INPUT=${SNAME}.bam OUTPUT=${SNAME}_sorted.bam
```

```
SO=coordinate CREATE_INDEX=true
```

```
echo "done" >| $SNAME.status
```



```
==> ./sanchari/j455/se_macs_hpne_sorted_mdup/hpne_sorted_mdup_model.r <==
# R script for Peak Model
# -- generated by MACS
p <-
c(0.0214117263579,0.0251867133745,0.0289751225671,0.0326427321752,0.0363808082076,0
.0366526072728,0.0369613173222,0.0370988946268,0.0370183615704,0.0371156723468,0.03
7159294419,0.0369411840581,0.0369143397059,0.036931117426,0.036924406338,0.03704520
59225,0.036931117426,0.0372767384595,0.0376525593892,0.03783711431,0.0381324021833,
0.0384713121288,0.038300179384,0.0383203126481,0.0382196463277,0.038286757208,0.038
1995130636,0.0380384469509,0.037840469854,0.0377062480934,0.0377599367977,0.0376794
037413,0.0379780471586,0.0380384469509,0.0382397795918,0.0379411361745,0.0381189800
072,0.0382196463277,0.0382498462238,0.0383303792802,0.0379612694385,0.0379075807343
,0.038055224671,0.0380820690231,0.0380183136868,0.0382230018717,0.0381928019756,0.0
381961575196,0.0383438014562,0.0384344011446,0.0386491559616,0.0389075328507,0.0388
337108824,0.0388504886024,0.0390417546113,0.0392766426923,0.039437708805,0.03960213
04617,0.0396155526378,0.0398034631026,0.0398772850709,0.039900773879,0.040008151287
5,0.0403302835129,0.0402598170886,0.0401960617523,0.0402262616485,0.0403034391608,0
.0403000836168,0.0403202168809,0.0403739055851,0.0404745719056,0.0403638389531,0.04
057859377,0.0407061044426,0.0408738816433,0.0412262137649,0.0411523917965,0.0413939
909656,0.0413201689973,0.0415315682702,0.0417865896153,0.0421254995608,0.0420013444
323,0.0422496546894,0.0424107208021,0.0421288551048,0.042407365258,0.0425348759306,
0.0428872080522,0.0426456088831,0.0426690976912,0.0425650758267,0.0426623866032,0.0
428804969641,0.0430147187247,0.043538183591,0.0435012726068,0.0437026052477,0.04341
73840065,0.0435012726068,0.0435549613111,0.0436791164396,0.0438435380963,0.04366569
42636,0.0438368270083,0.0436724053516,0.0438502491844,0.0438435380963,0.04415560368
97,0.0445347801634,0.0445549134275,0.0446891351881,0.0445985354997,0.0447864459645,
0.0447797348765,0.0449676453413,0.0448535568448,0.044907245549,0.0452394444065,0.04
5578354352,0.0458535089612,0.0460145750739,0.0462997963151,0.0462595297869,0.046142
0857464,0.0461219524823,0.0464273069877,0.0463534850194,0.0461756411866,0.045994441
8098,0.0459508197376,0.0460850414982,0.0461487968345,0.0464038181796,0.046407173723
6,0.0466655506127,0.0468031279173,0.047192371023,0.0473098150636,0.0476520805531,0.
0475950363048,0.047648725009,0.047631947289,0.0475145032485,0.047860124282,0.047793
0134017,0.0477762356816,0.0477057692573,0.047876902002,0.0479037463542,0.0480983679
07,0.0481856120514,0.0483601003402,0.0489842315269,0.0489607427188,0.0491385865516,
0.0493466302805,0.0494405855129,0.0498466063387,0.0500278057155,0.0500177390834,0.0
498298286186,0.0499908947313,0.0496385626098,0.0498063398105,0.0498231175306,0.0496
85540226,0.0501083387718,0.0499372060271,0.049910361675,0.0500915610518,0.050625092
5501,0.0506217370061,0.0508868249832,0.0508834694392,0.0511150019762,0.051302912441
1,0.0512592903689,0.0513264012492,0.0514740451858,0.0514572674657,0.0511686906805,0
.0513935121295,0.0514807562739,0.0518767104676,0.0521753538849,0.0521350873567,0.05
20042211401,0.0520713320204,0.0520075766842,0.0523397755416,0.0527457963674,0.05291
02180241,0.0526820410311,0.0525343970945,0.0523028645575,0.0526015079748,0.05276257
40875,0.0529605511843,0.0531987948094,0.0529941066245,0.0528397515998,0.05263170787
09,0.0529873955365,0.0532927500418,0.0533195943939,0.0535142159468,0.0536618598834,
0.0536350155313,0.0537423929398,0.0541249249575,0.0544537682709,0.054487323711,0.05
46047677516,0.0545309457832,0.0548027448484,0.0548732112727,0.0548396558326,0.05525
23877464,0.0553027209066,0.0555074090915,0.0554973424595,0.0558228302289,0.05612482
91902,0.0559872518856,0.0559302076374,0.0562154288786,0.0564436058716,0.05632616183
11,0.0563395840072,0.0561583846304,0.0566382274245,0.0567053383048,0.0568664044175,
0.0573361805795,0.0575240910444,0.0574267802679,0.0577925345655,0.0579401785022,0.0
581717110392,0.0584703544565,0.0584233768403,0.058805908858,0.059037441395,0.059248
8406679,0.0596045283335,0.0598259942385,0.0598696163107,0.0600776600396,0.060013904
7033,0.060396436721,0.0608158797228,0.0611413674922,0.0613963888374,0.0614802774377
,0.061537321686,0.0618695205434,0.0621010530804,0.0622587636491,0.062688273283,0.06
29869167003,0.0627990062355,0.0627956506915,0.0628929614679,0.0633023378377,0.06352
71592867,0.0635003149346,0.0637888917198,0.0641278016653,0.0644398672587,0.06438282
30105,0.0648291103644,0.0653257308786,0.0657384627924,0.0658491957449,0.06621159449
```

85, 0.0667249927327, 0.067251813143, 0.0673659016395, 0.0674095237117, 0.0677316559371, 0.0679464107541, 0.0680806325147, 0.0680000994583, 0.0685034310605, 0.0690772290871, 0.0693423170642, 0.0695637829692, 0.0698792041066, 0.0703489802686, 0.0707080234782, 0.0709966002635, 0.0710368667916, 0.0714797986016, 0.0716509313463, 0.0718187085471, 0.0721039297883, 0.0722415070929, 0.0727481942392, 0.0735635914347, 0.0740300120528, 0.0746440766075, 0.0756641619879, 0.0762648043666, 0.0768453134811, 0.0774862223879, 0.0778016435253, 0.0783318194797, 0.0791337944992, 0.0796404816454, 0.0800632801912, 0.0804122567688, 0.0806303671297, 0.0811940985242, 0.0816672302303, 0.0817074967585, 0.0823215613132, 0.0824893385139, 0.0823886721934, 0.0823584722973, 0.0828081151953, 0.0830631365404, 0.0834490241021, 0.0835329127025, 0.0834456685581, 0.0837711563275, 0.084120132905, 0.0847677528999, 0.0855395280233, 0.0861133260498, 0.0862408367223, 0.0868985233492, 0.0873951438634, 0.0878917643776, 0.0882810074833, 0.0885997841647, 0.0888581610538, 0.0892440486155, 0.0894286035363, 0.0894722256085, 0.0897675134818, 0.0898614687142, 0.0898245577301, 0.0900795790752, 0.0905493552373, 0.0908312209345, 0.0910426202074, 0.0909016873588, 0.090938598343, 0.0912338862163, 0.091861372947, 0.0920526389558, 0.0922204161566, 0.0924083266214, 0.0927875030951, 0.0931364796726, 0.0934921673382, 0.0940693209087, 0.094129720701, 0.0945827191429, 0.094589430231, 0.0951565171695, 0.0953343610022, 0.0956028045234, 0.0957638706361, 0.0962739133264, 0.096418201719, 0.0966027566398, 0.0970725328019, 0.0968342891768, 0.0970523995378, 0.0967638227525, 0.0971228659621, 0.0972738654428, 0.0973141319709, 0.0972268878265, 0.0974483537315, 0.0978476634693, 0.0981261736225, 0.0985959497846, 0.0988778154818, 0.0994985911245, 0.0999885005507, 0.100213322, 0.100813964378, 0.101065630179, 0.10159245059, 0.101934716079, 0.102434692137, 0.102740046643, 0.103001779076, 0.103226600525, 0.103384311094, 0.103709798863, 0.103884287152, 0.104253396993, 0.103817176271, 0.103998375648, 0.103911131504, 0.104152730673, 0.104578884763, 0.104931216884, 0.105159393877, 0.105400993046, 0.105867413664, 0.106166057082, 0.107051920702, 0.107427741631, 0.107776718209, 0.108384071675, 0.108585404316, 0.108840425661, 0.109454490216, 0.109645756225, 0.109977955082, 0.110477931141, 0.111182595384, 0.111498016521, 0.112336902525, 0.112940900447, 0.113638853603, 0.114236140437, 0.114793160744, 0.115393803122, 0.116014578765, 0.116880309121, 0.11717224145, 0.117692350772, 0.118356748487, 0.118917124338, 0.119735877077, 0.120517718833, 0.121138494475, 0.122423667833, 0.123108198812, 0.123678641295, 0.12449403849, 0.125987255577, 0.126530853707, 0.127316051007, 0.127735494008, 0.128248892243, 0.128950200942, 0.129503865704, 0.13028570746, 0.131399748072, 0.132094345684, 0.132235278532, 0.133268786089, 0.134037205668, 0.134963335816, 0.135765310836, 0.136758551864, 0.137681326468, 0.138271902215, 0.139073877234, 0.140328850696, 0.14135229162, 0.14186233431, 0.142889130779, 0.143882371807, 0.145284989205, 0.146060119873, 0.146526540491, 0.147566759135, 0.148100290634, 0.148647244308, 0.149734440569, 0.150915592062, 0.151677300553, 0.152714163654, 0.153230917432, 0.154469113174, 0.155334843529, 0.156361639998, 0.157438769627, 0.15863669884, 0.159777583805, 0.160596336545, 0.161723799334, 0.162753951346, 0.16369350367, 0.16456258957, 0.166089362097, 0.167166491725, 0.168293954514, 0.169418061759, 0.170213325691, 0.171696476145, 0.172552139869, 0.173535314265, 0.174924509487, 0.176035194556, 0.177139168537, 0.178316964486, 0.179360538675, 0.180038358566, 0.18092757773, 0.181773174821, 0.183148947867, 0.184585120706, 0.185470984326, 0.186387047842, 0.187336666798, 0.188423863059, 0.189819769369, 0.191641829769, 0.192776003646, 0.193947088507, 0.194658463838, 0.195853037507, 0.197517387339, 0.199158248362, 0.200470266071, 0.201735306165, 0.202547347817, 0.203627832989, 0.20507407246, 0.206530378562, 0.207855818448, 0.208865837196, 0.210067121954, 0.211788516033, 0.213278377576, 0.214684350518, 0.21658358843, 0.218221093909, 0.219466000739, 0.221049817514, 0.222643700921, 0.22382149687, 0.225046270435, 0.225606646286, 0.226767664515, 0.228331348026, 0.22969705444, 0.23076747298, 0.232458667164, 0.233753907154, 0.23528067968, 0.236901407439, 0.238525490742, 0.240102596429, 0.241605880148, 0.242592410088, 0.243042052986, 0.243766850493, 0.244998335147, 0.245585555349, 0.246464707881, 0.247229771917, 0.247947858336, 0.248575345067, 0.249149143093, 0.249323631382, 0.250618871371, 0.25110206971, 0.251380579863, 0.252279865659, 0.252420798507, 0.252689242029, 0.252712730837, 0.252877152493, 0.253232840159, 0.253407328448, 0.252729508557, 0.253219417983, 0.252461065036, 0.25171277872, 0.251377224319, 0.251263135822, 0.25028331697, 0.249320275838, 0.248159257609, 0.247280105077, 0.246716373682, 0.244998335147, 0.243870872358, 0.242988364282, 0.241183081602, 0.239310688042, 0.23833086919, 0.236804096663, 0.235260546416, 0.2333076198, 0.231660047688, 0.230482251739, 0.228750791028, 0.227012619228, 0.226452243377, 0.225603290742, 0.224871782147, 0.225620068462, 0.226193866488, 0.227603194975, 0.227713927927, 0.2278414386, 0.2282

44103881, 0.227391795702, 0.226234133017, 0.224405361528, 0.221237727979, 0.217137253193, 0.212150914787, 0.207144443117, 0.202738613825, 0.198342851166, 0.193531001049, 0.189833191545, 0.18642731437, 0.183870389831, 0.182558372121, 0.180900733378, 0.180145735974, 0.179360538675, 0.178263275782, 0.177494856203, 0.177253257034, 0.17687408056, 0.176018416836, 0.175075508968, 0.174380911357, 0.173099093543, 0.172444762461, 0.171676342881, 0.171206566719, 0.170240170043, 0.169595905592, 0.168495287155, 0.167894644777, 0.166636315771, 0.165495430806, 0.165428319926, 0.164626344906, 0.163683437038, 0.162915017459, 0.161968754047, 0.161153356851, 0.160911757682, 0.160119849294, 0.159945361006, 0.158693743088, 0.157572991387, 0.156569683727, 0

.  
155546242802, 0.154395291205, 0.153777871107, 0.152519542101, 0.150959214134, 0.149976039738, 0.148449267211, 0.14760367012, 0.14639231873, 0.145365522262, 0.143942771599, 0.142936108395, 0.141587179701, 0.141107336907, 0.140590583129, 0.139714786141, 0.138892677857, 0.137882659109, 0.137080684089, 0.135959932388, 0.135486800682, 0.134657981311, 0.133627829298, 0.131986968275, 0.130725283726, 0.129356221768, 0.128406602811, 0.127299273286, 0.126295965626, 0.125557745943, 0.124587993723, 0.123416908861, 0.122547822962, 0.12214515768, 0.121423715717, 0.120668718313, 0.119745943709, 0.119286234179, 0.118497681336, 0.117440684971, 0.116957486633, 0.116199133686, 0.115611913483, 0.1149575824, 0.114276406965, 0.113739519923, 0.113212699513, 0.112467768741, 0.111709415794, 0.111004751551, 0.110075265859, 0.109182691151, 0.108444471468, 0.10765256308, 0.10678347718, 0.106317056562, 0.105743258536, 0.104625862379, 0.104038642176, 0.103588999278, 0.102887690579, 0.102693069027, 0.102401136697, 0.10155889515, 0.100760275674, 0.0998710565101, 0.0991261257389, 0.0989818373462, 0.0980557071982, 0.0975456645079, 0.096656445344, 0.0957168930199, 0.0946666077433, 0.0939518768682, 0.0934821007061, 0.0928411917993, 0.0922002828925, 0.0915660850737, 0.0912640861124, 0.0905359330612, 0.0902473562759, 0.0899554239466, 0.0895359809448, 0.0892138487194, 0.0885024733883, 0.0877038539128, 0.0870562339179, 0.086395191747, 0.0855965722715, 0.0851804848137, 0.0847643973559, 0.0839624223364, 0.0833349356056, 0.0829389814119, 0.0824658497058, 0.0823047835931, 0.0820061401758, 0.0816873634944, 0.0814994530295, 0.0809021661949, 0.0804760121051, 0.0803485014325, 0.0802746794642, 0.0796941703496, 0.0796572593655, 0.0791337944992, 0.0788049511857, 0.0783519527437, 0.0778486211415, 0.0775868887084, 0.0769292020815, 0.0763285597029, 0.075909116701, 0.0757312728682, 0.0746272988874, 0.07431187775, 0.0736038579629, 0.0732448147533, 0.0726139724786, 0.0720468855401, 0.07157039829, 0.0711509552881, 0.0703624024447, 0.0700067147791, 0.0701275143637, 0.06974833789, 0.0692718506399, 0.0687517413176, 0.0688222077419, 0.0686443639092, 0.0684497423563, 0.0682819651556, 0.0682886762436, 0.0675403899283, 0.0671779911747, 0.0669229698296, 0.0666847262046, 0.066567282164, 0.065872684553, 0.0654364638311, 0.0650908427976, 0.0646177110915, 0.0643895340985, 0.0644935559629, 0.0643459120263, 0.0641177350333, 0.0643626897464, 0.064057335241, 0.0638492915121, 0.0636781587674, 0.0635204481987, 0.0634936038466, 0.0630607386687, 0.0625406293464, 0.0622822524572, 0.0621681639607, 0.0616983877987, 0.0614836329817, 0.0615876548462, 0.0612621670768, 0.0611011009641, 0.060856146251, 0.0605843471858, 0.0605205918495, 0.0604702586893, 0.0602353706083, 0.0602253039762, 0.0600206157913, 0.059721972374, 0.0595944617014, 0.059487084293, 0.0593528625324, 0.0592085741398, 0.059044152483, 0.0583898214002, 0.0580005782945, 0.0577120015092, 0.0573764471077, 0.0570576704263, 0.0570677370584, 0.0568060046252, 0.0565878942643, 0.0566080275283, 0.0563395840072, 0.0564234726075, 0.0562288510547, 0.0559771852536, 0.0558765189331, 0.0557322305405, 0.055386609507, 0.0551215215298, 0.0548597890967, 0.0546886563519, 0.0546785897199, 0.0544135017427, 0.0542356579099, 0.0540678807092, 0.0541920358377, 0.0539269478606, 0.0538866813324, 0.0537692372919, 0.0534034829943, 0.0530981284889, 0.0525041971983, 0.0523934642459, 0.0522525313972, 0.0518699993796, 0.0515378005221, 0.0515512226982, 0.0512223793847, 0.051279423633, 0.051279423633, 0.0512727125449, 0.0513700233214, 0.0515780670503, 0.051514311714, 0.0516284002105, 0.0516888000028, 0.0514572674657, 0.0515478671541, 0.0512458681928, 0.0512089572087, 0.0508767583512, 0.0507358255026, 0.0500680722437, 0.0499405615711, 0.0495278296573, 0.0489540316308, 0.0488500097663, 0.0484507000286, 0.0481218567151, 0.0480144793066, 0.0480446792028, 0.0477493913295, 0.0478265688418, 0.0474339701921, 0.0475044366164, 0.0475715474967, 0.0474306146481, 0.0473500815917, 0.0474574590002, 0.0472729040794, 0.0470313049103, 0.0470178827343, 0.0468266167254, 0.0467527947571, 0.0466017952764, 0.0464709290599, 0.046276307507, 0.0462058410827, 0.0460313527939, 0.0458870644013, 0.0454676213995, 0.0453870883431, 0.0451756890702, 0.0450381117656, 0.0448200014046, 0.0445750466916, 0.0443904917707, 0.0440952038975, 0.0

438066271122, 0.0433938951984, 0.0434979170628, 0.0434207395505, 0.0433536286702, 0.0431388738533, 0.0428804969641, 0.0430113631807, 0.0428234527159, 0.0426657421472, 0.0422395880573, 0.0422563657774, 0.0422228103372, 0.0420382554164, 0.0417966562474, 0.0415483459903, 0.0414074131417, 0.0410752142842, 0.0410819253722, 0.0411356140765, 0.0413503688934, 0.041266480293, 0.0409678368757, 0.0408873038194, 0.0410383033, 0.0412295693089, 0.0412362803969, 0.0409577702437, 0.0407698597789, 0.0407363043387, 0.0403739055851, 0.0401994172964, 0.0402430393686, 0.0402497504566, 0.0400685510798, 0.0400081512875, 0.0400383511837, 0.0400987509759, 0.040112173152, 0.0398605073509, 0.0398403740868, 0.0398403740868, 0.0398068186466, 0.03965917471, 0.0397195745023, 0.0395182418614, 0.0393504646606, 0.0391625541958, 0.0391524875638, 0.0391357098437, 0.0390618878754, 0.0390551767873, 0.0388370664264, 0.0385854006253, 0.0383572236323, 0.0383807124404, 0.0382666239439, 0.0384008457045, 0.0382464906798, 0.0379176473663, 0.0381860908875, 0.0378807363822, 0.0379142918223, 0.0378639586621, 0.0377297369015, 0.0377330924455, 0.0377297369015, 0.0375351153487, 0.0375854485089, 0.0377465146216, 0.037602226229, 0.0379277139984, 0.0377733589737, 0.0379746916146, 0.0379847582466, 0.0378941585582, 0.037830403222, 0.037840469854, 0.0377330924455, 0.0378203365899, 0.0375686707888, 0.0374545822923, 0.0374914932765, 0.0374881377325, 0.0372666718275, 0.037145872243, 0.0371290945229, 0.0369613173222, 0.0368841398098, 0.0366358295527, 0.0368505843697, 0.036921050794, 0.0368304511056, 0.0365250966002, 0.03646496808, 0.0364076525597, 0.0365083188802, 0.0366794516249, 0.0365955630245, 0.0366156962886, 0.0365418743203, 0.0364982522481, 0.0365552964964, 0.0364848300721, 0.0366458961848, 0.0365016077921, 0.0364009414717, 0.0361022980544, 0.0362130310069, 0.0364344969118, 0.0363942303837, 0.0363170528713, 0.0363069862393, 0.0363036306953, 0.0361996088308, 0.0364110081037, 0.036464696808, 0.0365922074805, 0.0363237639594, 0.0359814984699, 0.036011698366, 0.0357566770209, 0.0357197660367, 0.0359412319417, 0.0358741210614, 0.0359412319417, 0.0358539877973, 0.0359546541177, 0.0361358534945, 0.0363371861354, 0.0361996088308, 0.0364546301759, 0.0364378524559, 0.0360687426142, 0.0361190757745, 0.0360821647903, 0.0360486093501, 0.0359110320455, 0.0357667436529, 0.0354983001317, 0.0354009893553, 0.0351895900824, 0.0352600565067, 0.0352936119468, 0.0351291902901, 0.0351392569222, 0.0350889237619, 0.0349849018975, 0.0352164344345, 0.035330522931, 0.0353506561951, 0.0352332121546, 0.0349010132971, 0.0350218128816, 0.0351694568183, 0.0348540356809, 0.0349211465612, 0.0350151017936, 0.0347063917443, 0.0346728363041, 0.0347231694643, 0.0347667915365, 0.0346795473921, 0.0345990143358, 0.0344580814872, 0.0346761918481, 0.034645991952, 0.0346090809678, 0.03463592532, 0.0344345926791, 0.0343003709185, 0.0343372819026, 0.0345621033516, 0.0345822366157, 0.0345587478076, 0.0341762157899, 0.0340319273973, 0.0340789050135, 0.0338809279166, 0.0339513943409, 0.0338842834607, 0.0339446832529, 0.033954749885, 0.0337668394201, 0.0338037504043, 0.0339178389008, 0.0338842834607, 0.033739995068, 0.0338943500927, 0.0339044167247, 0.0338943500927, 0.0337735505082, 0.033511818075, 0.0333977295785, 0.0334480627387, 0.0334950403549, 0.0333876629465, 0.0332400190098, 0.033286996626, 0.0331963969376, 0.0332668633619, 0.0330890195292, 0.0332333079218, 0.0336493953796, 0.0334681960028, 0.0334816181789, 0.0335252402511, 0.0336795952758, 0.0336259065715, 0.0334178628426, 0.033276929994, 0.0335285957951, 0.0334581293708, 0.0333104854341, 0.0333809518584, 0.0333708852264, 0.033276929994, 0.03327357445, 0.0332198857457, 0.0334044406665, 0.0332433745538, 0.0329648644006, 0.0329917087527, 0.0326695765273, 0.0325789768389, 0.0326125322791, 0.0327098430555, 0.0326628654393, 0.0328004427439, 0.0327870205678, 0.0329883532087, 0.0330957306172, 0.0328943979763, 0.0329883532087, 0.0331125083373, 0.0328675536242, 0.0328641980802, 0.032823931552, 0.0325554880308, 0.0328675536242, 0.0328541314481, 0.0330084864728, 0.0330118420168, 0.0328876868883, 0.0329380200485, 0.0330084864728, 0.0329044646084, 0.0329950642968, 0.0329346645045, 0.0327064875115, 0.0327333318636, 0.032589043471, 0.0327970871999, 0.0328541314481, 0.0326897097914, 0.0324984437826, 0.032364222022, 0.0322031559093, 0.0323877108301, 0.0322937555977, 0.032146111661, 0.0319481345642, 0.0318810236839, 0.0320521564286, 0.0320991340448, 0.0320118899004, 0.0321729560131, 0.0321528227491, 0.0321729560131, 0.0320689341487, 0.0319380679321, 0.0320118899004, 0.0319615567402, 0.031921290212, 0.0318810236839, 0.0319716233723, 0.0319783344603, 0.031904512492, 0.0317367352912, 0.0318072017155, 0.0320286676205, 0.0320756452367, 0.0321528227491, 0.0320253120765, 0.0317971350835, 0.0320689341487, 0.0320118899004, 0.0320622230607, 0.0319682678282, 0.0320253120765, 0.0320118899004, 0.0320118899004, 0.0318441126997, 0.0319481345642, 0.032146111661, 0.0319783344603, 0.0318810236839, 0.0319548456522, 0.031904512492, 0.0318139128036, 0.0318709570518, 0.0286160793575, 0.0254618679837, 0.022304790975, 0.0190158679314, 0.0)

m <-

c(0.0189074088781, 0.0221498297863, 0.0253049805666, 0.0285776103653, 0.0315548643463, 0.0315682905198, 0.0314508115014, 0.0314004633507, 0.031491090022, 0.0315078727389, 0.0316555606478, 0.031692482625, 0.0315917863235, 0.0315145858257, 0.0317696831228, 0.0318703794243, 0.0320449196803, 0.0320012846163, 0.0319274406619, 0.0318603097942, 0.0318737359677, 0.0316857695383, 0.0317327611456, 0.0317629700361, 0.0317394742324, 0.0317596134927, 0.0317831092964, 0.0319173710317, 0.0318770925111, 0.031981145356, 0.0320079977031, 0.032182537959, 0.0323772174752, 0.0322664515436, 0.0323671478451, 0.032340295498, 0.0322194599362, 0.0323604347583, 0.0324477048863, 0.03269944564, 0.0325148357539, 0.0323705043884, 0.0321623986987, 0.0321556856119, 0.0318871621413, 0.0318200312736, 0.0317025522552, 0.0315414381728, 0.0315615774331, 0.0313568282867, 0.0313702544602, 0.0313366890264, 0.0314608811316, 0.0313836806338, 0.0314978031088, 0.0313870371771, 0.0315951428669, 0.0314776638485, 0.0315145858257, 0.031491090022, 0.0314776638485, 0.031665630278, 0.0316891260816, 0.0318166747302, 0.0319408668354, 0.0320348500501, 0.0320382065935, 0.0322395991965, 0.0323302258678, 0.0323000169774, 0.0323940001921, 0.0322865908039, 0.0320885547442, 0.0320851982009, 0.0321489725251, 0.0323235127811, 0.0322630950002, 0.0322395991965, 0.0320717720273, 0.0321489725251, 0.0321489725251, 0.0322664515436, 0.0324141394524, 0.0325316184708, 0.0325920362517, 0.0326893760099, 0.0327766461378, 0.0330048910879, 0.0330988743026, 0.0333136930791, 0.0333707543167, 0.0334580244446, 0.0335083725954, 0.0335687903763, 0.0335654338329, 0.0333841804902, 0.0334412417277, 0.0332062836909, 0.0334882333351, 0.0334378851843, 0.0334748071615, 0.0334311720976, 0.0335352249424, 0.0335553642027, 0.033553642027, 0.033750043719, 0.0337299044587, 0.0338675227374, 0.0336157819836, 0.0337634698925, 0.0338775923675, 0.0337567568057, 0.0338238876734, 0.0338104614999, 0.033750043719, 0.0336761997645, 0.0338675227374, 0.0339312970617, 0.0340152106463, 0.0338608096506, 0.0338876619977, 0.034109193861, 0.0340387064499, 0.0340185671896, 0.0341125504044, 0.0343743607883, 0.0342736644868, 0.0345220486971, 0.0345354748707, 0.0347167282134, 0.0346328146288, 0.0347469371038, 0.0350926610723, 0.0351698615701, 0.0352269228076, 0.0350960176157, 0.0351195134194, 0.0348442768619, 0.0350053909443, 0.0349718255105, 0.0349751820539, 0.0349516862502, 0.0348610595788, 0.0349214773597, 0.034914764273, 0.0350188171179, 0.0350691652686, 0.0351094437892, 0.0349483297068, 0.0352269228076, 0.0353477583694, 0.0354954462783, 0.0352940536753, 0.0356498472739, 0.0358445267902, 0.0359754319821, 0.0359653623519, 0.0361029806307, 0.0363580779278, 0.036237242366, 0.0362338858226, 0.036324512494, 0.0366803060926, 0.0364520611425, 0.0364722004028, 0.036525905097, 0.0367272977, 0.0368716290654, 0.0369421164765, 0.0367776458507, 0.0368649159787, 0.0367507935036, 0.0366601668323, 0.0367373673301, 0.0368582028919, 0.0366568102889, 0.0366467406588, 0.0366635233757, 0.0364520611425, 0.0367910720242, 0.0367205846132, 0.0366735930058, 0.0367608631338, 0.0367944285676, 0.0368347070882, 0.0368716290654, 0.0368078547412, 0.0367810023941, 0.0367138715264, 0.0366903757227, 0.0368179243713, 0.0368078547412, 0.0367340107867, 0.0367138715264, 0.0365460443573, 0.0367709327639, 0.0368716290654, 0.0370696651251, 0.0372844839016, 0.0371972137736, 0.0372844839016, 0.0372677011847, 0.0372811273582, 0.0371602917964, 0.0371636483398, 0.0370663085817, 0.0370226735177, 0.03695554265, 0.0370730216684, 0.0371065871023, 0.0369018379559, 0.0370126038875, 0.0370562389515, 0.0372274226641, 0.0373415451391, 0.0374120325501, 0.0374254587237, 0.0373281189656, 0.0372744142714, 0.0373012666185, 0.0374791634178, 0.0375865728061, 0.0376637733039, 0.037603355523, 0.037646990587, 0.0378282439297, 0.037922271444, 0.0378416701032, 0.0378450266466, 0.0377376172583, 0.037646990587, 0.0376335644134, 0.0376637733039, 0.0377208345414, 0.0376369209568, 0.0373952498332, 0.0372777708148, 0.0372643446413, 0.0373415451391, 0.0375664335458, 0.0377879654091, 0.0380464192496, 0.0380162103591, 0.038163898268, 0.0383451516107, 0.0382981600033, 0.0385801096475, 0.0389963210271, 0.0392312790639, 0.0392379921507, 0.0393554711691, 0.0391540785661, 0.0392916968448, 0.0393454015389, 0.0392984099316, 0.0394695936441, 0.0395098721647, 0.0394360282103, 0.0393521146257, 0.0393521146257, 0.0394998025346, 0.0395568637721, 0.0396709862471, 0.0399294400876, 0.0400704149097, 0.0401274761472, 0.0402248159053, 0.0405168351797, 0.0408021413673, 0.0410303863173, 0.0409968208835, 0.0409632554497, 0.0410941606416, 0.0411042302718, 0.0412149962034, 0.0414499542402, 0.0413996060895, 0.0412384920071, 0.0411579349659, 0.0410639517512, 0.0410236732306, 0.0412217092902, 0.0413459013954, 0.0414029626329, 0.0414667369572, 0.0415674332587, 0.0416446337565, 0.0420004273551, 0.0420138535286, 0.042262237739, 0.0423931429309, 0.0424837696023, 0.042735510356, 0.0429033375252, 0.0430141034569, 0.0431953567996, 0.0433967494026, 0.0431584348223, 0.0433799666856, 0.043470593357, 0.0436954817637, 0.0441385454903, 0.044158

6847506, 0.0442963030293, 0.0443768600705, 0.0444876260021, 0.0447427232993, 0.0450481687471, 0.0452361351766, 0.0453166922178, 0.0455885722318, 0.0456355638392, 0.0455583633414, 0.0458201737253, 0.0462330285614, 0.0465418305527, 0.0466928750049, 0.0469311895852, 0.0470285293433, 0.0472903397272, 0.0472702004669, 0.0474447407228, 0.0477669688876, 0.0475857155449, 0.047639420239, 0.047525297764, 0.0478072474082, 0.047797177778, 0.047884447906, 0.0480321358149, 0.0479885007509, 0.0480724143355, 0.0480556316186, 0.0484382775643, 0.04860274819, 0.0488578454872, 0.0488242800533, 0.0491196558711, 0.0494620232962, 0.0497641122007, 0.0502776633383, 0.0502340282743, 0.0505931784163, 0.0507979275627, 0.0509086934944, 0.0510597379466, 0.0512577740062, 0.0514692362394, 0.0516169241482, 0.0516202806916, 0.0515262974769, 0.0519492219432, 0.0521606841763, 0.052271450108, 0.0525097646882, 0.0523922856698, 0.0524527034507, 0.0524627730808, 0.0527279400081, 0.0529628980449, 0.0531340817575, 0.0533656832509, 0.0533824659678, 0.053348900534, 0.053191142995, 0.0535603627672, 0.0538758778452, 0.0540336353842, 0.0540134961239, 0.0541477578592, 0.0546042477594, 0.0545773954123, 0.0546042477594, 0.0549298324675, 0.0553863223677, 0.0555038013861, 0.0556246369479, 0.0560207090671, 0.0563395806885, 0.0565879648989, 0.0566752350268, 0.0569437584975, 0.0576083540874, 0.0580312785537, 0.0581722533758, 0.0585448296913, 0.0589207625503, 0.0590113892216, 0.0590248153951, 0.0591959991077, 0.059303408496, 0.0594309571445, 0.0591322247834, 0.0591456509569, 0.059504801099, 0.0597632549395, 0.0598001769167, 0.0599881433462, 0.0604345636161, 0.0605621122647, 0.0608071399317, 0.0610655937722, 0.0614985878686, 0.0616865542981, 0.0619752170291, 0.0620960525909, 0.0621128353078, 0.0622907321071, 0.0622907321071, 0.0627942136146, 0.0630895894323, 0.0632943385787, 0.0633312605559, 0.0633245474691, 0.0631533637566, 0.0633748956199, 0.0637441153921, 0.0641703964017, 0.0644590591327, 0.0644456329592, 0.0646570951923, 0.0647880003843, 0.0653854651065, 0.0659057293309, 0.0663387234273, 0.0666710212223, 0.0668489180216, 0.0669966059305, 0.0674027476798, 0.067701480041, 0.0678458114064, 0.0682083180918, 0.0685003373662, 0.0687722173802, 0.0690877324583, 0.069453595687, 0.0698630939798, 0.0700342776923, 0.0701249043637, 0.0704303498116, 0.0710781626845, 0.0717897498818, 0.0718501676627, 0.0721388303937, 0.0727161558556, 0.0729544704358, 0.0734042472492, 0.0740184946883, 0.074401140634, 0.0751530063519, 0.0754148167358, 0.0756061397086, 0.076170038997, 0.0765593980295, 0.0767507210023, 0.0774824474599, 0.077824814885, 0.0780664860086, 0.0785565413425, 0.078455845041, 0.0788384909867, 0.0790130312426, 0.0793419724942, 0.0798152451112, 0.0800334204312, 0.0802851611849, 0.0804966234181, 0.080916191341, 0.0813626116109, 0.0822487390641, 0.0828629865033, 0.0835712171571, 0.0841854645963, 0.0845479712817, 0.0853602547804, 0.0855247254062, 0.0862530953204, 0.0870318133853, 0.0874480247648, 0.087746757126, 0.088132759615, 0.0886295280358, 0.0890323132418, 0.0896197083338, 0.0900090673663, 0.090549470851, 0.090952256057, 0.0911502921166, 0.0917209044918, 0.0921572551316, 0.0930064606076, 0.0935737164393, 0.0942148162256, 0.0947417935367, 0.0952184226972, 0.096171681018, 0.0972256356404, 0.0985145482996, 0.0994308846432, 0.10031029901, 0.100750006193, 0.101387749436, 0.10212618898, 0.103055951497, 0.103972287841, 0.104445560458, 0.104838276034, 0.104979250856, 0.10548944545, 0.10618424993, 0.106882410954, 0.107694694453, 0.108315654979, 0.108681518208, 0.109591141464, 0.110232241251, 0.111172073398, 0.112108549002, 0.1126422394, 0.11333704388, 0.114333937265, 0.114978393595, 0.116143114149, 0.116408281076, 0.11734475668, 0.118519546864, 0.119268056038, 0.119882303478, 0.120704656606, 0.121553862082, 0.121949934202, 0.123118011299, 0.124088052337, 0.125511226731, 0.12608519565, 0.126404067271, 0.127229776944, 0.12833743626, 0.129683410157, 0.1305997465, 0.131747684338, 0.132439132274, 0.133076875517, 0.134463127935, 0.135634561575, 0.137319546354, 0.138229169611, 0.139259628429, 0.140021563777, 0.141001674445, 0.142025420177, 0.143626491371, 0.144660306733, 0.144932186747, 0.145979428283, 0.146294943361, 0.147922866902, 0.148996960784, 0.15004420232, 0.151380106586, 0.152219242432, 0.152779785177, 0.15343766768, 0.15519313987, 0.155995353738, 0.157290979484, 0.157549433325, 0.158277803239, 0.159496228487, 0.159831882825, 0.161221491786, 0.161912939723, 0.16328912251, 0.164363216393, 0.164876767531, 0.165695764116, 0.166299941925, 0.167632489648, 0.168797210202, 0.169656485308, 0.170435203373, 0.171187069091, 0.171935578266, 0.172345076558, 0.173761537866, 0.17421131468, 0.175224990781, 0.175946647609, 0.176208457993, 0.177255699528, 0.177494014108, 0.178594960338, 0.178987675914, 0.179977856212, 0.179994638929, 0.181307047392, 0.182105904717, 0.182139470151, 0.183505583308, 0.185613492553, 0.188050343049, 0.190742290842, 0.194733220925, 0.198539541122, 0.203487086069, 0.208333934714, 0.212949181866, 0.217960501137, 0.22194136159, 0.224982389895, 0.227761607817, 0.229547288896, 0.230567678085, 0.23024544992, 0.229664767915, 0.228828988612, 0.228617526379, 0.228184532283, 0.22786901

7205, 0.227926078442, 0.228694726877, 0.229500297289, 0.2300272746, 0.232517829791, 0.234098761724, 0.235834094653, 0.237619775733, 0.239264481991, 0.240902475162, 0.241738254465, 0.242164535474, 0.243580996782, 0.244849770181, 0.245390173666, 0.246930827078, 0.24812239998, 0.248740003962, 0.249710045

,  
0.250260518115, 0.251787745354, 0.252717507871, 0.253163928141, 0.25288533504, 0.253294833333, 0.253194137032, 0.253033022949, 0.252905474301, 0.25221066982, 0.252741003675, 0.252086477715, 0.252482549834, 0.25173404066, 0.252187174017, 0.250998957659, 0.249955072667, 0.249246842013, 0.248478193578, 0.247709545143, 0.246393780137, 0.245997708018, 0.24481956129, 0.243792459015, 0.242550537963, 0.242127613497, 0.240972962573, 0.240063339316, 0.239267838534, 0.23805276983, 0.236649734695, 0.235333969689, 0.234004778509, 0.232749431284, 0.231490727515, 0.229795673107, 0.229228417275, 0.227704546579, 0.226039701061, 0.225274409169, 0.223609563651, 0.22151508058, 0.22013554125, 0.218443843384, 0.217114652205, 0.215882800783, 0.214050128096, 0.212576605551, 0.211301119065, 0.210032345666, 0.208877694742, 0.208035202353, 0.20628644325, 0.205259340975, 0.203722044105, 0.202416348729, 0.201254984719, 0.19958006957, 0.198398566299, 0.197146575618, 0.19597849852, 0.194565393756, 0.19349801296, 0.192091621282, 0.190856413317, 0.189893085366, 0.189010314456, 0.188080551939, 0.187076945468, 0.185757823918, 0.184421919651, 0.183143076622, 0.181951503721, 0.180971393053, 0.179716045828, 0.178699013183, 0.177426883241, 0.1767119395, 0.175412957211, 0.17422138431, 0.173543362546, 0.17245584249, 0.171193782178, 0.170173392989, 0.169119438367, 0.167612350388, 0.166343576989, 0.164447129978, 0.163399888442, 0.162745362482, 0.161171143635, 0.160479695698, 0.160006423081, 0.159278053167, 0.158214028915, 0.157559502955, 0.156884837735, 0.156310868816, 0.15522334876, 0.153565216329, 0.152665662702, 0.151450593997, 0.150158324795, 0.14869487188, 0.147969858509, 0.146734650544, 0.1458183142, 0.144771072665, 0.143770822736, 0.142935043434, 0.142585962922, 0.141965002396, 0.140914404317, 0.140108833905, 0.139209280279, 0.138121760222, 0.137118153751, 0.13680935176, 0.135778892941, 0.135228419826, 0.13458732004, 0.133422599486, 0.132680803398, 0.132241096215, 0.131596639885, 0.131358325305, 0.130509119829, 0.129854593869, 0.129354468905, 0.128622742448, 0.127666127583, 0.126917618409, 0.126165752691, 0.124947327443, 0.124343149634, 0.123369752053, 0.12249369423, 0.121399461087, 0.121013458598, 0.120379071898, 0.119526509879, 0.118965967134, 0.118435633279, 0.118415494019, 0.117687124105, 0.116985606538, 0.116378072185, 0.115730259312, 0.114813922969, 0.113961360949, 0.113598854264, 0.113202782145, 0.112789927309, 0.112199175673, 0.111766181577, 0.111145221051, 0.110822992886, 0.110124831862, 0.109617993811, 0.109097729587, 0.108453273257, 0.107792034211, 0.107563789261, 0.106909263301, 0.106335294383, 0.106325224752, 0.105653916076, 0.106019779305, 0.105731116574, 0.105308192107, 0.105086660244, 0.104754362449, 0.104375073047, 0.10415018464, 0.103851452279, 0.103519154484, 0.103069377671, 0.102163110957, 0.101840882792, 0.101565646235, 0.101048738554, 0.100877554841, 0.100085410603, 0.100028349365, 0.0997363300911, 0.0993369014285, 0.0993570406888, 0.0993637537755, 0.0991657177159, 0.0991254391953, 0.0989508989394, 0.0987931414004, 0.0984944090393, 0.0977895349288, 0.0976116381294, 0.0972457749007, 0.0967355803064, 0.0963428647306, 0.0962388118857, 0.0959971407621, 0.0956480602502, 0.0953493278891, 0.0954131022134, 0.0953426148023, 0.0952721273913, 0.0950539520714, 0.0950808044184, 0.0948659856419, 0.0943423648741, 0.0937885352159, 0.093526724832, 0.0935602902658, 0.0929493993701, 0.0928184941781, 0.0923855000817, 0.0922008901956, 0.0920599153735, 0.0915027291719, 0.0913651108931, 0.0914322417608, 0.0914355983042, 0.0907777158011, 0.0905863928282, 0.0904890530701, 0.0902574515767, 0.0900426328001, 0.0895794298132, 0.0896834826581, 0.0895089424022, 0.0891262964565, 0.0889081211366, 0.0889416865704, 0.0889920347212, 0.0887570766843, 0.0883207260445, 0.0879011581216, 0.0878776623179, 0.0875252252627, 0.0871358662302, 0.0869210474537, 0.0864914099006, 0.0858838755482, 0.0854643076253, 0.0850548093326, 0.0850480962458, 0.0847594335148, 0.0842760912676, 0.0842324562037, 0.083876662605, 0.0838263144543, 0.0835510778968, 0.0833899638144, 0.0831113707136, 0.0825608975988, 0.0821346165891, 0.0819533632464, 0.0816579874287, 0.0811209404873, 0.0810940881403, 0.08062752861, 0.0802717350114, 0.0797279749833, 0.0792110673023, 0.0788116386396, 0.0784692712145, 0.0780027116843, 0.0774086035054, 0.0768413476737, 0.075881376266, 0.075092588571, 0.0742702354421, 0.0739815727111, 0.0734143168793, 0.0727933563534, 0.0719978555716, 0.0715078002376, 0.071108371575, 0.0708163523006, 0.0706720209352, 0.0703095142498, 0.0701718959711, 0.069987286085, 0.0698731636099, 0.069700342776923, 0.0696482752033, 0.0692656292576, 0.0686983734258, 0.0684499892154, 0.0681579699411, 0.0678961595572, 0.0675437225019, 0.0669496143231, 0.0664897678796, 0.0658352

419198, 0.065714406358, 0.0656741278374, 0.0655063006683, 0.0649759668137, 0.06466380827  
91, 0.0645698250643, 0.0642845188768, 0.0640092823193, 0.0639924996024, 0.0636434190906,  
0.0634655222912, 0.0629016230028, 0.0628109963315, 0.0626935173131, 0.0625793948381, 0.0  
623142279108, 0.0620926960475, 0.0620289217232, 0.0616529888643, 0.0616496323209, 0.0615  
422229326, 0.061387821937, 0.0611830727906, 0.0610186021648, 0.0608339922787, 0.06053190  
33742, 0.0604110678124, 0.0598370988939, 0.0596793413549, 0.0596994806152, 0.05968269789  
83, 0.0593940351673, 0.059102015893, 0.0586186736458, 0.0580447047272, 0.0579540780559, 0  
.0575076577859, 0.0575680755668, 0.0573465437035, 0.0569370454107, 0.0564738424238, 0.05  
67088004607, 0.0564906251408, 0.0566785915702, 0.0568363491092, 0.0567322962644, 0.05680  
94967622, 0.0567893575019, 0.0567893575019, 0.0567490789813, 0.0565040513143, 0.05628923  
25378, 0.0563194414282, 0.0560777703046, 0.0560139959803, 0.0556447762082, 0.05556086262  
36, 0.0554366705184, 0.0551278685271, 0.0550405983992, 0.0548324927094, 0.0546680220836,  
0.0547015875175, 0.0544330640468, 0.0543457939188, 0.054671378627, 0.0543525070056, 0.05  
39396521695, 0.053865808215, 0.0533455439906, 0.0533824659678, 0.0533153351002, 0.053050  
1681729, 0.0530031765655, 0.0528051405059, 0.0525970348161, 0.0525836086426, 0.052774931  
6155, 0.0528252797662, 0.0529360456979, 0.0527380096382, 0.0525265474051, 0.052395642213  
2, 0.0520163528108, 0.0518921607057, 0.0514021053717, 0.0511235122709, 0.0505696826126, 0  
.0502776633383, 0.0500494183882, 0.0501501146897, 0.0501568277765, 0.0501836801236, 0.05  
05629695259, 0.0504018554435, 0.0504018554435, 0.0505159779185, 0.0508516322568, 0.05071  
40139781, 0.0509086934944, 0.0505965349597, 0.0504320643339, 0.0504287077905, 0.05003263  
56713, 0.0500057833242, 0.0499554351735, 0.0499050870228, 0.0496567028124, 0.04954593688  
07, 0.0492639872365, 0.0493915358851, 0.049294196127, 0.0492270652593, 0.0494150316888, 0  
.0492371348895, 0.0490390988299, 0.048777288446, 0.0485725392996, 0.0484550602812, 0.048  
3711466966, 0.0481663975502, 0.0481160493995, 0.0479045871663, 0.0477132641935, 0.047521  
9412206, 0.0473641836816, 0.047323905161, 0.0475353673941, 0.0476427767824, 0.0475185846  
772, 0.0472836266404, 0.0469479723021, 0.0466593095711, 0.0464780562284, 0.0464176384475  
, 0.0465720394431, 0.0466727357446, 0.0464411342512, 0.0463370814063, 0.0464277080777, 0.  
0464814127718, 0.0464075688174, 0.0462800201688, 0.0463035159725, 0.046447847338, 0.0461  
826804107, 0.0459477223739, 0.0459846443511, 0.04591415694, 0.0457765386613, 0.045598641  
862, 0.0454274581494, 0.0454006058024, 0.045440884323, 0.0452864833273, 0.0451723608523,  
0.0449911075096, 0.0447393667559, 0.0444507040249, 0.0443365815499, 0.04434665118, 0.044  
7326536691, 0.0448232803405, 0.0446286008242, 0.0442862333991, 0.0442828768557, 0.044202  
3198145, 0.0441385454903, 0.0441721109241, 0.0443063726594, 0.0443231553763, 0.043896874  
3667, 0.0436652728732, 0.0433799666856, 0.0434437410099, 0.0434135321195, 0.043524298051  
1, 0.043514228421, 0.0435880723754, 0.043111443215, 0.0428932678951, 0.0429704683929, 0.0  
430845908679, 0.0429469725892, 0.0428093543105, 0.042621387881, 0.0424434910817, 0.04215  
14718074, 0.0417386169712, 0.0416714861035, 0.0415808594322, 0.0411579349659, 0.04078871  
51937, 0.040896124582, 0.0409129072989, 0.0408457764313, 0.0406846623489, 0.040526904809  
8, 0.0407148712393, 0.0408155675408, 0.0407585063033, 0.0407282974128, 0.0407517932165, 0  
.0405705398738, 0.0406544534584, 0.04053697444, 0.0404732001157, 0.0405638267871, 0.0404  
93339376, 0.0404832697459, 0.0403187991201, 0.0403557210973, 0.0401409023208, 0.04016439  
81244, 0.0398858050236, 0.0397985348957, 0.0396239946397, 0.039687768964, 0.039664273160  
3, 0.0392648444977, 0.0393487580823, 0.0394125324066, 0.0395467941419, 0.0396340642699, 0  
.0395367245118, 0.0395199417949, 0.0395669334022, 0.0395904292059, 0.039241348694, 0.039  
5165852515, 0.0392480617808, 0.0390903042418, 0.0388352069447, 0.0385163353232, 0.038509  
6222365, 0.0387647195336, 0.0388352069447, 0.0387747891638, 0.0387311540998, 0.038439134  
8254, 0.0387345106432, 0.0388452765748, 0.0390063906572, 0.0391473654793, 0.039013103744  
, 0.0387378671865, 0.0385196918666, 0.0380430627062, 0.0381739678982, 0.0382713076563, 0.  
0379155140576, 0.0378450266466, 0.0377006952811, 0.0373885367465, 0.0372945535317, 0.037  
0058908008, 0.036928690303, 0.037042812778, 0.0370226735177, 0.036928690303, 0.036787715  
4809, 0.0365494009006, 0.0367440804169, 0.0367776458507, 0.0369823949971, 0.037066308581  
7, 0.0371468656229, 0.0371905006868, 0.0370226735177, 0.0369421164765, 0.0370360996912, 0  
.0371334394493, 0.0369387599331, 0.0368749856088, 0.033031743435, 0.0294335289281, 0.025  
7144788594, 0.0220323507679, 0.0)

ycorr <- c(-9.641783324e-05, -9.67063590239e-05, -9.75720481994e-05, -9.90179308984e-  
05, -0.000101047778359, -0.000103664768662, -0.000106873524395, -0.000110083865994, -  
0.000113300509028, -0.000116528330718, -0.000119772425616, -0.00012303733834, -  
0.000126326897757, -0.00012964304828, -0.000132986203639, -0.000136357365723, -  
0.000139756720371, -0.000143182965623, -0.00014663439946, -0.000150109883165, -



0.000153607033787, -0.000157124223235, -0.000160659694493, -0.000164213315908, -  
0.000167784584968, -0.000171372049104, -0.000174972309795, -0.000178584816318, -  
0.000182207444248, -0.000185837192783, -0.000189472336191, -0.000193110585176, -  
0.000196750828478, -0.000200390960823, -0.000204028931967, -0.000207662996948, -  
0.000211292837693, -0.000214916448196, -0.000218531010568, -0.000222135616554, -  
0.000225729022386, -0.000229310310999, -0.000232878762127, -0.000236432791023, -  
0.000239971270794, -0.000243491737354, -0.000246993612217, -0.000250475671337, -  
0.000253938017974, -0.000257381123627, -0.000260805354353, -0.000264208728998, -  
0.000267589498084, -0.000270946922353, -0.000274278846032, -0.000277584931678, -  
0.000280864778782, -0.000284116824288, -0.000287341479051, -0.000290537756917, -  
0.000293703622708, -0.000296839407906, -0.000299945740016, -0.000303022347223, -  
0.000306069991571, -0.000309088319858, -0.00031207723721, -0.00031503695312, -  
0.000317967379455, -0.000320866295073, -0.000323734372043, -0.000326572199814, -  
0.000329378390265, -0.000332153455092, -0.000334897825511, -0.000337611506849, -  
0.000340294580545, -0.000342946978939, -0.000345568670157, -0.000348160650292, -  
0.000350723807153, -0.00035325805617, -0.000355763303023, -0.000358239219414, -  
0.000360685615276, -0.000363103504829, -0.000365492854065, -0.000367855081982, -  
0.000370190363613, -0.000372498614042, -0.000374780481701, -0.000377035956262, -  
0.000379265353461, -0.000381469283899, -0.000383648214088, -0.000385801861381, -  
0.000387930118986, -0.000390033421296, -0.000392111603687, -0.000394165721033, -  
0.000396195246035, -0.000398199769836, -0.000400179972575, -0.000402135393686, -  
0.000404065841833, -0.00040597218495, -0.00040785407292, -0.000409711168901, -  
0.000411542864587, -0.000413347840208, -0.000415125869219, -0.000416877803648, -  
0.000418603313719, -0.000420302813241, -0.000421977671331, -0.000423628294924, -  
0.000425254378681, -0.000426856782452, -0.000428436029203, -0.000429992812079, -  
0.000431528083361, -0.000433040734752, -0.000434530742743, -0.000435998943239, -  
0.00043744412465, -0.000438865281537, -0.000440262759506, -0.000441636167408, -  
0.000442986021576, -0.000444312747933, -0.000445615953018, -0.000446896810902, -  
0.000448157276585, -0.000449397133271, -0.000450615915969, -0.000451814203491, -  
0.000452992839784, -0.00045415108108, -0.000455289019701, -0.000456407001581, -  
0.000457504611396, -0.000458582510136, -0.000459640094393, -0.000460675951085, -  
0.000461690605587, -0.000462685246695, -0.000463659823403, -0.000464615578096, -  
0.000465552953871, -0.000466472404495, -0.00046737347989, -0.000468256649025, -  
0.000469121426916, -0.000469968324963, -0.000470798394081, -0.000471610866473, -  
0.000472405827432, -0.000473182378117, -0.000473938940477, -0.000474675612164, -  
0.000475393472074, -0.000476091762913, -0.000476770410693, -0.000477430026166, -  
0.000478070533346, -0.00047869287298, -0.00047929778605, -0.000479884977566, -  
0.000480456354221, -0.00048101198266, -0.000481551872081, -0.000482075256972, -  
0.00048258336378, -0.000483076662643, -0.000483555168099, -0.00048401882647, -  
0.000484466540028, -0.000484898875862, -0.000485316026024, -0.000485717381786, -  
0.00048610373478, -0.000486476055367, -0.000486834457237, -0.000487178680423, -  
0.000487509427515, -0.000487826336868, -0.000488129779175, -0.000488420855529, -  
0.000488698595461, -0.000488964500406, -0.000489218944099, -0.000489461945316, -  
0.00048969374102, -0.000489914914747, -0.000490125482988, -0.000490325225123, -  
0.000490515390117, -0.000490696280154, -0.00049086808553, -0.000491031075244, -  
0.000491184316483, -0.000491328077233, -0.000491462289597, -0.000491587037362, -  
0.000491701692288, -0.000491806998683, -0.000491902345425, -0.000491987029018, -  
0.000492061162575, -0.000492124454656, -0.000492177512595, -0.000492220401613, -  
0.000492252880688, -0.000492274770971, -0.000492285621437, -0.000492285284048, -  
0.000492273579519, -0.0004922506185, -0.000492216399544, -0.000492171071753, -  
0.000492114830272, -0.000492048253123, -0.000491970816345, -0.000491883432706, -  
0.000491786957872, -0.000491682199743, -0.000491569961266, -0.000491449954591, -  
0.000491322852751, -0.000491188427261, -0.000491045889812, -0.000490894109223, -  
0.000490732890471, -0.000490562311124, -0.000490381226875, -0.000490189012515, -  
0.000489984725591, -0.000489768048546, -0.000489538850776, -0.000489296017414, -  
0.000489040016453, -0.000488771669308, -0.000488491806093, -0.000488199705208, -  
0.000487895164331, -0.00048757868544, -0.000487250400146, -0.000486910885628, -  
0.000486560109473, -0.000486198570127, -0.00048582654074, -0.000485443638281, -  
0.000485049644072, -0.000484644614538, -0.000484229280664, -0.000483803838998, -

0.000483367828493, -0.000482920539983, -0.000482461711519, -0.000481991173753, -  
0.000481507983736, -0.000481012156008, -0.000480503346699, -0.000479980267554, -  
0.000479442445347, -0.000478889223349, -0.000478320357938, -0.000477735657868, -  
0.000477135220879, -0.000476519148341, -0.000475888024575, -0.000475242704607, -  
0.000474583067435, -0.000473909706915, -0.000473223131003, -0.000472523028065, -  
0.000471810024079, -0.000471084378708, -0.000470345899373, -0.000469594576733, -  
0.000468829985265, -0.000468051025524, -0.000467257033865, -0.000466447667184, -  
0.000465622230424, -0.000464780578831, -0.000463922074872, -0.000463045865099, -  
0.000462151300605, -0.000461238191706, -0.00046030561868, -0.000459352643183, -  
0.000458378625063, -0.000457383505826, -0.000456367289828, -0.000455329565523, -  
0.000454269916488, -0.000453189095035, -0.000452087467356, -0.000450965532446, -  
0.000449824173491, -0.000448664020084, -0.000447486244829, -0.000446292121384, -  
0.000445081690864, -0.00044385562242, -0.000442614311571, -0.000441358326551, -  
0.000440087099542, -0.000438800476179, -0.000437497957685, -0.000436179766931, -  
0.000434846388577, -0.000433497061354, -0.00043213159755, -0.000430749811321, -  
0.000429352039658, -0.00042793881219, -0.000426510153335, -0.000425066005629, -  
0.000423606826299, -0.000422132952137, -0.000420643503027, -0.000419138143441, -  
0.000417617835003, -0.000416082282127, -0.00041453146822, -0.000412964039989, -  
0.000411380297295, -0.000409780333754, -0.000408164427604, -0.000406532266403, -  
0.00040488393392, -0.00040322037018, -0.00040154140876, -0.000399846589921, -  
0.000398136642448, -0.000396411894509, -0.000394673181058, -0.000392920553404, -  
0.000391154406082, -0.000389375012989, -0.0003875826992, -0.000385776735038, -  
0.000383956756598, -0.000382124009229, -0.000380278685756, -0.000378420629088, -  
0.000376549539337, -0.000374664721049, -0.000372765227793, -0.000370850938449, -  
0.000368921272473, -0.000366976805498, -0.000365017914467, -0.000363044065559, -  
0.000361054186869, -0.000359048511991, -0.000357027248551, -0.000354991217736, -  
0.000352941153108, -0.000350877611206, -0.000348800827699, -0.000346711161741, -  
0.000344608437894, -0.00034249322946, -0.000340366037774, -0.000338226955303, -  
0.000336075472752, -0.000333911363413, -0.00033173454439, -0.000329544471115, -  
0.000327341102962, -0.000325124226005, -0.000322893798514, -0.000320649496227, -  
0.000318390690293, -0.000316117557998, -0.000313830781049, -0.000311530050245, -  
0.000309215729482, -0.000306887994546, -0.000304547110962, -0.000302192575837, -  
0.000299824151716, -0.000297441662797, -0.000295045487579, -0.000292636061262, -  
0.000290212845404, -0.000287775664292, -0.00028532451703, -0.000282858721601, -  
0.000280378131893, -0.000277883728632, -0.000275376584695, -0.000272856771499, -  
0.000270324345272, -0.000267778458518, -0.000265218849772, -0.000262645827692, -  
0.0002600595103, -0.000257460026747, -0.000254847548569, -0.00025222063524, -  
0.000249578200352, -0.000246920025799, -0.000244246628431, -0.000241558857747, -  
0.000238857240293, -0.000236142354027, -0.000233413530605, -0.000230670546962, -  
0.000227913647594, -0.000225143917932, -0.000222362042579, -0.000219568500022, -  
0.000216762423533, -0.000213943226106, -0.000211110364335, -0.00020826280282, -  
0.000205400334841, -0.000202523346876, -0.00019963177997, -0.000196724703975, -  
0.000193801100896, -0.00019086104185, -0.000187905078274, -0.000184933307509, -  
0.000181946020848, -0.000178943665602, -0.000175926548872, -0.000172894609573, -  
0.000169847531606, -0.000166785234345, -0.000163708381595, -0.00016061665625, -  
0.000157509272019, -0.000154385269874, -0.000151244427101, -0.000148085988219, -  
0.000144909301056, -0.00014171381835, -0.000138499136311, -0.000135265915279, -  
0.000132013952625, -0.000128743172038, -0.000125453525474, -0.000122145582534, -  
0.000118819385814, -0.00011547558706, -0.000112114336326, -0.000108736461315, -  
0.000105343150743, -0.000101934333842, -9.85099263334e-05, -9.50698526408e-05, -  
9.16141943411e-05, -8.81427774234e-05, -8.46555145662e-05, -8.11522595607e-05, -  
7.7633076901e-05, -7.4097362111e-05, -7.05439921853e-05, -6.69724496835e-05, -  
6.33827202966e-05, -5.97745196588e-05, -5.61478273026e-05, -5.25024193161e-05, -  
4.88383382627e-05, -4.51559337079e-05, -4.14553147401e-05, -3.77362350883e-05, -  
3.3999041838e-05, -3.02437691074e-05, -2.64700392033e-05, -2.26777702334e-05, -  
1.88669538973e-05, -1.50383900496e-05, -1.11925523103e-05, -7.32936095102e-06, -  
3.44826377583e-06, 4.50820295249e-07, 4.36803969875e-06, 8.30335380856e-  
06, 1.22565133224e-05, 1.62274467752e-05, 2.02164759667e-05, 2.42242804483e-  
05, 2.82520510701e-05, 3.23002943651e-05, 3.63685730082e-05, 4.04562296861e-

05, 4.45629439629e-05, 4.86884604971e-05, 5.28321250854e-05, 5.69943945353e-05, 6.11744514047e-05, 6.5371510177e-05, 6.95843957469e-05, 7.38131700815e-05, 7.80576120511e-05, 8.23179765839e-05, 8.65946592276e-05, 9.08879780885e-05, 9.51983909781e-05, 9.95257457193e-05, 0.00010386982936, 0.000108231595499, 0.000112611736126, 0.00011700983962, 0.00012142528095, 0.00012585813334, 0.000130307823283, 0.000134774394876, 0.000139257291618, 0.000143755850023, 0.000148270109471, 0.00015279963551, 0.000157343386493, 0.000161901172912, 0.000166473451887, 0.000171060182757, 0.000175661141754, 0.000180275935052, 0.000184904238338, 0.000189546181068, 0.000194201955577, 0.000198871472912, 0.000203554869151, 0.000208252245549, 0.000212963372177, 0.000217688283027, 0.000222427294045, 0.000227180030524, 0.000231946705957, 0.00023672747794, 0.000241521968759, 0.000246329528082, 0.00025114989897, 0.00025598224607, 0.00026082644029, 0.000265681737942, 0.00027054752919, 0.000275422645353, 0.000280307471832, 0.000285201354198, 0.000290103924273, 0.000295015292358, 0.000299935643215, 0.00030486516038, 0.000309803864284, 0.000314750849061, 0.000319705810906, 0.00032466882808, 0.000329639780125, 0.00033461754062, 0.00033960147874, 0.00034459050125, 0.000349583600433, 0.000354579947418, 0.000359578431186, 0.000364578783445, 0.00036958113218, 0.00037458581907, 0.000379591500368, 0.0003845974571, 0.000389603593676, 0.000394609588181, 0.000399615009044, 0.00040461987893, 0.000409623820913, 0.000414626814198, 0.000419627836755, 0.000424625640437, 0.000429619202849, 0.000434608977439, 0.000439594800115, 0.000444576369731, 0.00044955333596, 0.000454524787139, 0.000459489489179, 0.000464446526922, 0.000469394861712, 0.000474333968639, 0.000479263850844, 0.000484183831245, 0.000489093341691, 0.000493991951509, 0.000498879779829, 0.000503757889194, 0.000508633345845, 0.000513515678803, 0.000518414281705, 0.000523338180177, 0.000528322713953, 0.000533170980271, 0.000537912568455, 0.000542554031027, 0.000547102200938, 0.000551562518687, 0.000555938001519, 0.0005602204753, 0.000564399175483, 0.000568463253194, 0.000572401556582, 0.000576176963742, 0.000579984547097, 0.000583792158777, 0.00058759090176, 0.000591372733678, 0.000595129983014, 0.00059885768027, 0.000602556223033, 0.00060622664317, 0.000609869973966, 0.000613488218708, 0.000617082111251, 0.000620653266787, 0.000624203679318, 0.000627734532093, 0.000631245902263, 0.000634737555993, 0.000638208955428, 0.000641659612127, 0.000645088581624, 0.000648494719833, 0.000651876502066, 0.000655233287947, 0.00065856304102, 0.000661864171141, 0.00066513519652, 0.00066837460783, 0.000671581529151, 0.000674754661455, 0.000677892932131, 0.000680994348557, 0.000684057550474, 0.000687081012043, 0.000690062998006, 0.000693002130289, 0.000695897119463, 0.000698747095046, 0.000701551094991, 0.000704307481498, 0.000707015140804, 0.000709672939419, 0.00071228058862, 0.000714837651325, 0.000717343382705, 0.000719797035702, 0.000722198243949, 0.000724546179645, 0.000726840058404, 0.000729079214913, 0.000731263011209, 0.000733390784899, 0.000735461652272, 0.000737474477212, 0.000739428268639, 0.000741322281712, 0.000743155548726, 0.000744927130553, 0.000746635656835, 0.000748280563399, 0.000749860852957, 0.000751375989933, 0.000752825506667, 0.000754208297686, 0.00075552375019, 0.000756771619059, 0.000757951596076, 0.000759063119284, 0.000760105851062, 0.000761079486712, 0.00076198344003, 0.00076281724203, 0.00076358059016, 0.000764273100359, 0.000764895553097, 0.000765447919271, 0.000765930106485, 0.00076634242007, 0.000766685252149, 0.000766958758292, 0.000767163703758, 0.000767300392916, 0.000767369394237, 0.000767370907307, 0.0007673053337, 0.000767172527115, 0.000766972244896, 0.000766704456081, 0.000766369103426, 0.000765967092414, 0.000765498419779, 0.000764963281575, 0.000764361786481, 0.000763694848979, 0.000762962565218, 0.000762165008627, 0.000761303123205, 0.000760378087537, 0.000759390693885, 0.000758341167617, 0.000757230007557, 0.000756058431106, 0.000754826905478, 0.00075353610737, 0.000752186148388, 0.000750778421822, 0.000749313813774, 0.000747792611612, 0.000746215588967, 0.000744582784501, 0.000742895239354, 0.000741153358699, 0.000739357593486, 0.000737508649197, 0.000735607670689, 0.000733655561231, 0.000731653161677, 0.000729601332637, 0.000727500973885, 0.000725353269475, 0.000723159525853, 0.000720920589883, 0.000718637920904, 0.000716312727244, 0.000713946103246, 0.000711538227686, 0.000709089449223, 0.000706600407316, 0.00070407174025, 0.000701504188005, 0.0006988898057821, 0.000696254138035, 0.000693572872304, 0.000690854448983, 0.000688099388656, 0.000685308540679, 0.000682483047681, 0.000679623867684, 0.000676731512869, 0.000673807006576, 0.000670851082681, 0.000667864367514, 0.000664847976293, 0.00066180252208, 0.00065872874968, 0.000655627889501, 0.000652500857237, 0.000649348378263, 0.00064617145078, 0.000642970816148, 0.000639746972558, 0.00063650054936, 0.000633232401987, 0.000629943143745, 0.000626633309239, 0.000

623303034298, 0.000619952326804, 0.00061658145361, 0.000613191137319, 0.000609781791234, 0.000606353875496, 0.000602907790502, 0.000599443761058, 0.000595961956389, 0.000592463090644, 0.000588948442378, 0.000585418303767, 0.000581873423816, 0.000578314134678, 0.000574740321898, 0.000571152637497, 0.000567551910509, 0.00056393860039, 0.000560313609416, 0.000556677350781, 0.000553029686355, 0.000549371230282, 0.000545702745094, 0.000542024747385, 0.000538338119639, 0.000534643543922, 0.000530941375295, 0.000527231487438, 0.000523514558868, 0.000519790794942, 0.000516060734368, 0.000512325103962, 0.000508584251574, 0.000504838839808, 0.000501088956885, 0.000497335073909, 0.000493578078906, 0.000489818665572, 0.000486057535364, 0.000482295123395, 0.00047853185829, 0.000474768403444, 0.000471004910352, 0.000467241376462, 0.000463478645205, 0.000459716866683, 0.000455955603059, 0.000452195023897, 0.000448435013992, 0.000444676573015, 0.000440920137467, 0.000437166019313, 0.000433414064521, 0.000429664581861, 0.000425917741824, 0.000422173636239, 0.000418432777269, 0.000414696009974, 0.00041096374459, 0.000407236133979, 0.000403512701393, 0.000399793645353, 0.000396079610901, 0.000392370958131, 0.00038866790852, 0.000384970606998, 0.000381279035223, 0.000377593430957, 0.000373914088328, 0.000370240689704, 0.000366573902165, 0.000362913255896, 0.000359258822831, 0.000355609984389, 0.000351967014892, 0.000348330293096, 0.000344700234889, 0.000341076999405, 0.000337460334797, 0.000333849967484, 0.00033024586925, 0.000326647965248, 0.000323056566203, 0.000319472261973, 0.000315895712529, 0.000312326594575, 0.000308764539856, 0.000305208913717, 0.000301659910462, 0.000298118022403, 0.000294583435564, 0.000291056428989, 0.000287536753475, 0.000284024664998, 0.000280519155022, 0.000277020025268, 0.000273527986227, 0.000270043222551, 0.000266566116939, 0.000263096625207, 0.000259634476683, 0.000256179348247, 0.000252731027838, 0.00024928994206, 0.000245856294601, 0.000242430126743, 0.000239010754718, 0.000235597444572, 0.000232189833404, 0.000228787558682, 0.000225389836623, 0.00022196543573, 0.000218607913845, 0.000215223481214, 0.000211842501468, 0.000208464935004, 0.000205090715694, 0.000201719990178, 0.000198352796558, 0.000194989016589, 0.000191629262827, 0.000188274010633, 0.000184922669583, 0.000181575041082, 0.000178231160157, 0.000174891543886, 0.000171555865091, 0.000168224219145, 0.000164896879804, 0.000161574009584, 0.000158255307725, 0.000154939859357, 0.00015162766031, 0.000148318330459, 0.000145011593631, 0.000141706815581, 0.000138403399364, 0.000135101501928, 0.00013180042615, 0.000128499615757, 0.00012519814764, 0.000121896248347, 0.000118594492218, 0.000115292964927, 0.000111992493465, 0.000108693330834, 0.000105396676316, 0.000102102523944, 9.88107829774e-05, 9.55220829608e-05, 9.22375567085e-05, 8.8958411267e-05, 8.56847837739e-05, 8.24165621316e-05, 7.91533766306e-05, 7.58951774703e-05, 7.2641600974e-05, 6.93922508823e-05, 6.61474193396e-05, 6.29064316251e-05, 5.96692832139e-05, 5.64350086676e-05, 5.32030594218e-05, 4.99730023432e-05, 4.6744927379e-05, 4.35186451282e-05, 4.02935951906e-05, 3.70703653651e-05, 3.38485513634e-05, 3.06285546529e-05, 2.74108610178e-05, 2.41954809573e-05, 2.09827021433e-05, 1.77734370949e-05, 1.45680672598e-05, 1.13674360227e-05, 8.17276834316e-06, 4.98451222703e-06, 1.80366264895e-06, -1.36888936829e-06, -4.53311987486e-06, -7.68865733222e-06, -1.0834775869e-05, -1.39714259745e-05, -1.70986202549e-05, -2.0216385221e-05, -2.33257860973e-05, -2.64271169168e-05, -2.95202107264e-05, -3.26063068545e-05, -3.56853645043e-05, -3.87579807359e-05, -4.18243750102e-05, -4.48847126823e-05, -4.79388714777e-05, -5.09868102673e-05, -5.40277998684e-05, -5.70610640956e-05, -6.00871776288e-05, -6.3105301895e-05, -6.6115110251e-05, -6.91158347309e-05, -7.21066960743e-05, -7.50871929718e-05, -7.80571000769e-05, -8.10163076494e-05, -8.39643312527e-05, -8.69014231737e-05, -8.9827319104e-05, -9.2741425233e-05, -9.56435977108e-05, -9.85334007006e-05, -0.000101411150778, -0.000104276293219, -0.000107128365424, -0.000109967499179, -0.000112793363916, -0.000115606138356, -0.000118405532019, -0.000121191184414, -0.000123963424044, -0.00012672233966, -0.000129467603734, -0.000132199750374, -0.000134919403024, -0.000137626475515, -0.000140320779715, -0.000143002110763, -0.000145670409171, -0.000148325882381, -0.000150968744254, -0.00015359851381, -0.000156215627018, -0.000158820529995, -0.000161412253485, -0.000163990624013, -0.000166555976441, -0.000169108099385, -0.000171646865197, -0.000174172576204, -0.000176684710285, -0.000179183288396, -0.000181668524297, -0.000184139817662, -0.000186597664269, -0.000189042235719, -0.000191473060518, -0.000193890051983, -0.000196293707816, -0.000198684041742, -0.000201060993831, -0.000203425083058, -0.000205776279234, -0.000208114067594, -0.000210438558279, -0.000212748991656, -0.000215046204335, -

0.000217330686594, -0.000219601720897, -0.000221859112309, -0.000224102745049, -  
0.00022633203136, -0.000228546636071, -0.000230746692478, -0.000232931645821, -  
0.000235101752087, -0.000237257255085, -0.000239397520488, -0.000241522600005, -  
0.000243632225321, -0.000245726574694, -0.000247805886182, -0.000249870559419, -  
0.000251920707198, -0.000253957008277, -0.000255979931179, -0.000257988674886, -  
0.000259982247156, -0.000261961496375, -0.000263926461892, -0.000265877033076, -  
0.000267812909812, -0.000269733824448, -0.000271639380752, -0.000273529147485, -  
0.000275402160017, -0.00027725833491, -0.000279098897948, -0.000280923278541, -  
0.000282730897594, -0.000284521798298, -0.000286296207458, -0.000288053527924, -  
0.000289794104252, -0.000291517953397, -0.000293225599383, -0.000294917194414, -  
0.000296592875365, -0.000298252537623, -0.000299896890421, -0.000301526021727, -  
0.000303140186224, -0.000304740254649, -0.000306326453917, -0.000307898836861, -  
0.000309457416183, -0.000311001873617, -0.000312532310928, -0.000314048705909, -  
0.00031555071188, -0.000317038386894, -0.000318511082929, -0.000319968017887, -  
0.000321408714191, -0.0003228330272, -0.000324240547675, -0.000325631537411, -  
0.00032700556411, -0.000328362129806, -0.000329701553667, -0.000331023726524, -  
0.0003323292704, -0.000333618835265, -0.00033  
4892592401, -0.000336151015966, -0.000337394537954, -0.000338622766446, -  
0.000339835575249, -0.000341033503214, -0.000342216864376, -0.000343385064308, -  
0.00034453716613, -0.000345672019905, -0.00034678851395, -0.000347885600204, -  
0.000348963264417, -0.000350021445278, -0.000351060077277, -0.000352078826884, -  
0.0003530765826, -0.000354053121132, -0.000355009423397, -0.000355946147971, -  
0.00035686497888, -0.000357766795986, -0.000358651773253, -0.000359519433877, -  
0.000360369921791, -0.000361203482911, -0.000362020713567, -0.000362822317876, -  
0.000363608299548, -0.000364377375949, -0.000365129180843, -0.000365862945559, -  
0.000366578005007, -0.000367274945478, -0.000367953920409, -0.000368614012702, -  
0.000369255832058, -0.000369878924395, -0.000370482673995, -0.000371067395274, -  
0.000371633228083, -0.000372180065564, -0.000372708111523, -0.000373217625075, -  
0.000373708241473, -0.00037417939681, -0.00037463134897, -0.000375063736395, -  
0.000375476625139, -0.000375870479021, -0.000376244784344, -0.000376599159678, -  
0.000376933471929, -0.000377246955106, -0.000377538952307, -0.00037780973575, -  
0.000378057865243, -0.000378282783262, -0.000378483095209, -0.000378659127671, -  
0.000378810317534, -0.00037893682168, -0.000379038732756, -0.000379116213991, -  
0.000379168425843, -0.000379195873051, -0.00037919997127, -0.000379181536388, -  
0.000379141899453, -0.000379080575169, -0.000378996789142, -0.000378890458092, -  
0.000378761208526, -0.000378608551962, -0.000378432993948, -0.000378234811585, -  
0.00037801205056, -0.000377763644335, -0.000377489248578, -0.00037718843362, -  
0.000376862449313, -0.000376510728079, -0.000376133486504, -0.000375731138113, -  
0.000375304564671, -0.000374853590238, -0.000374378643085, -0.000373881625029, -  
0.000373362312563, -0.000372821835207, -0.000372259084889, -0.000371675077969, -  
0.000371070191425, -0.000370444098653, -0.000369796938461, -0.000369128252725, -  
0.000368438505709, -0.000367726932195, -0.000366994206871, -0.000366239866375, -  
0.000365464288949, -0.000364667982796, -0.00036385000257, -0.000363011075692, -  
0.000362151279327, -0.000361270973361, -0.000360371193233, -0.000359452212391, -  
0.000358514289011, -0.000357557080893, -0.000356582842572, -0.000355590665603, -  
0.000354580743163, -0.000353654669256, -0.000352913597313, -0.000352358119686, -  
0.000351987020781, -0.000351801716806)  
xcorr <- c(-600.0, -598.999165972, -597.998331943, -596.997497915, -595.996663887, -  
594.995829858, -593.99499583, -592.994161802, -591.993327773, -590.992493745, -  
589.991659716, -588.990825688, -587.98999166, -586.989157631, -585.988323603, -  
584.987489575, -583.986655546, -582.985821518, -581.98498749, -580.984153461, -  
579.983319433, -578.982485405, -577.981651376, -576.980817348, -575.979983319, -  
574.979149291, -573.978315263, -572.977481234, -571.976647206, -570.975813178, -  
569.974979149, -568.974145121, -567.973311093, -566.972477064, -565.971643036, -  
564.970809008, -563.969974979, -562.969140951, -561.968306922, -560.967472894, -  
559.966638866, -558.965804837, -557.964970809, -556.964136781, -555.963302752, -  
554.962468724, -553.961634696, -552.960800667, -551.959966639, -550.959132611, -  
549.958298582, -548.957464554, -547.956630525, -546.955796497, -545.954962469, -  
544.95412844, -543.953294412, -542.952460384, -541.951626355, -540.950792327, -

539.949958299, -538.94912427, -537.948290242, -536.947456214, -535.946622185, -  
534.945788157, -533.944954128, -532.9441201, -531.943286072, -530.942452043, -  
529.941618015, -528.940783987, -527.939949958, -526.93911593, -525.938281902, -  
524.937447873, -523.936613845, -522.935779817, -521.934945788, -520.93411176, -  
519.933277731, -518.932443703, -517.931609675, -516.930775646, -515.929941618, -  
514.92910759, -513.928273561, -512.927439533, -511.926605505, -510.925771476, -  
509.924937448, -508.92410342, -507.923269391, -506.922435363, -505.921601334, -  
504.920767306, -503.919933278, -502.919099249, -501.918265221, -500.917431193, -  
499.916597164, -498.915763136, -497.914929108, -496.914095079, -495.913261051, -  
494.912427023, -493.911592994, -492.910758966, -491.909924937, -490.909090909, -  
489.908256881, -488.907422852, -487.906588824, -486.905754796, -485.904920767, -  
484.904086739, -483.903252711, -482.902418682, -481.901584654, -480.900750626, -  
479.899916597, -478.899082569, -477.89824854, -476.897414512, -475.896580484, -  
474.895746455, -473.894912427, -472.894078399, -471.89324437, -470.892410342, -  
469.891576314, -468.890742285, -467.889908257, -466.889074229, -465.8882402, -  
464.887406172, -463.886572143, -462.885738115, -461.884904087, -460.884070058, -  
459.88323603, -458.882402002, -457.881567973, -456.880733945, -455.879899917, -  
454.879065888, -453.87823186, -452.877397832, -451.876563803, -450.875729775, -  
449.874895746, -448.874061718, -447.87322769, -446.872393661, -445.871559633, -  
444.870725605, -443.869891576, -442.869057548, -441.86822352, -440.867389491, -  
439.866555463, -438.865721435, -437.864887406, -436.864053378, -435.863219349, -  
434.862385321, -433.861551293, -432.860717264, -431.859883236, -430.859049208, -  
429.858215179, -428.857381151, -427.856547123, -426.855713094, -425.854879066, -  
424.854045038, -423.853211009, -422.852376981, -421.851542952, -420.850708924, -  
419.849874896, -418.849040867, -417.848206839, -416.847372811, -415.846538782, -  
414.845704754, -413.844870726, -412.844036697, -411.843202669, -410.842368641, -  
409.841534612, -408.840700584, -407.839866555, -406.839032527, -405.838198499, -  
404.83736447, -403.836530442, -402.835696414, -401.834862385, -400.834028357, -  
399.833194329, -398.8323603, -397.831526272, -396.830692244, -395.829858215, -  
394.829024187, -393.828190158, -392.82735613, -391.826522102, -390.825688073, -  
389.824854045, -388.824020017, -387.823185988, -386.82235196, -385.821517932, -  
384.820683903, -383.819849875, -382.819015847, -381.818181818, -380.81734779, -  
379.816513761, -378.815679733, -377.814845705, -376.814011676, -375.813177648, -  
374.81234362, -373.811509591, -372.810675563, -371.809841535, -370.809007506, -  
369.808173478, -368.80733945, -367.806505421, -366.805671393, -365.804837364, -  
364.804003336, -363.803169308, -362.802335279, -361.801501251, -360.800667223, -  
359.799833194, -358.798999166, -357.798165138, -356.797331109, -355.796497081, -  
354.795663053, -353.794829024, -352.793994996, -351.793160967, -350.792326939, -  
349.791492911, -348.790658882, -347.789824854, -346.788990826, -345.788156797, -  
344.787322769, -343.786488741, -342.785654712, -341.784820684, -340.783986656, -  
339.783152627, -338.782318599, -337.78148457, -336.780650542, -335.779816514, -  
334.778982485, -333.778148457, -332.777314429, -331.7764804, -330.775646372, -  
329.774812344, -328.773978315, -327.773144287, -326.772310259, -325.77147623, -  
324.770642202, -323.769808173, -322.768974145, -321.768140117, -320.767306088, -  
319.76647206, -318.765638032, -317.764804003, -316.763969975, -315.763135947, -  
314.762301918, -313.76146789, -312.760633862, -311.759799833, -310.758965805, -  
309.758131776, -308.757297748, -307.75646372, -306.755629691, -305.754795663, -  
304.753961635, -303.753127606, -302.752293578, -301.75145955, -300.750625521, -  
299.749791493, -298.748957465, -297.748123436, -296.747289408, -295.746455379, -  
294.745621351, -293.744787323, -292.743953294, -291.743119266, -290.742285238, -  
289.741451209, -288.740617181, -287.739783153, -286.738949124, -285.738115096, -  
284.737281068, -283.736447039, -282.735613011, -281.734778982, -280.733944954, -  
279.733110926, -278.732276897, -277.731442869, -276.730608841, -275.729774812, -  
274.728940784, -273.728106756, -272.727272727, -271.726438699, -270.725604671, -  
269.724770642, -268.723936614, -267.723102585, -266.722268557, -265.721434529, -  
264.7206005, -263.719766472, -262.718932444, -261.718098415, -260.717264387, -  
259.716430359, -258.71559633, -257.714762302, -256.713928274, -255.713094245, -  
254.712260217, -253.711426188, -252.71059216, -251.709758132, -250.708924103, -  
249.708090075, -248.707256047, -247.706422018, -246.70558799, -245.704753962, -

244.703919933, -243.703085905, -242.702251877, -241.701417848, -240.70058382, -  
239.699749791, -238.698915763, -237.698081735, -236.697247706, -235.696413678, -  
234.69557965, -233.694745621, -232.693911593, -231.693077565, -230.692243536, -  
229.691409508, -228.69057548, -227.689741451, -226.688907423, -225.688073394, -  
224.687239366, -223.686405338, -222.685571309, -221.684737281, -220.683903253, -  
219.683069224, -218.682235196, -217.681401168, -216.680567139, -215.679733111, -  
214.678899083, -213.678065054, -212.677231026, -211.676396997, -210.675562969, -  
209.674728941, -208.673894912, -207.673060884, -206.672226856, -205.671392827, -  
204.670558799, -203.669724771, -202.668890742, -201.668056714, -200.667222686, -  
199.666388657, -198.665554629, -197.664720601, -196.663886572, -195.663052544, -  
194.662218515, -193.661384487, -192.660550459, -191.65971643, -190.658882402, -  
189.658048374, -188.657214345, -187.656380317, -186.655546289, -185.65471226, -  
184.653878232, -183.653044204, -182.652210175, -181.651376147, -180.650542118, -  
179.64970809, -178.648874062, -177.648040033, -176.647206005, -175.646371977, -  
174.645537948, -173.64470392, -172.643869892, -171.643035863, -170.642201835, -  
169.641367807, -168.640533778, -167.63969975, -166.638865721, -165.638031693, -  
164.637197665, -163.636363636, -162.635529608, -161.63469558, -160.633861551, -  
159.633027523, -158.632193495, -157.631359466, -156.630525438, -155.62969141, -  
154.628857381, -153.628023353, -152.627189324, -151.626355296, -150.625521268, -  
149.624687239, -148.623853211, -147.623019183, -146.622185154, -145.621351126, -  
144.620517098, -143.619683069, -142.618849041, -141.618015013, -140.617180984, -  
139.616346956, -138.615512927, -137.614678899, -136.613844871, -135.613010842, -  
134.612176814, -133.611342786, -132.610508757, -131.609674729, -130.608840701, -  
129.608006672, -128.607172644, -127.606338616, -126.605504587, -125.604670559, -  
124.60383653, -123.603002502, -122.602168474, -121.601334445, -120.600500417, -  
119.599666389, -118.59883236, -117.597998332, -116.597164304, -115.596330275, -  
114.595496247, -113.594662219, -112.59382819, -111.592994162, -110.592160133, -  
109.591326105, -108.590492077, -107.589658048, -106.58882402, -105.587989992, -  
104.587155963, -103.586321935, -102.585487907, -101.584653878, -100.58381985, -  
99.5829858215, -98.5821517932, -97.5813177648, -96.5804837364, -95.5796497081, -  
94.5788156797, -93.5779816514, -92.577147623, -91.5763135947, -90.5754795663, -  
89.5746455379, -88.5738115096, -87.5729774812, -86.5721434529, -85.5713094245, -  
84.5704753962, -83.5696413678, -82.5688073394, -81.5679733111, -80.5671392827, -  
79.5663052544, -78.565471226, -77.5646371977, -76.5638031693, -75.562969141, -  
74.5621351126, -73.5613010842, -72.5604670559, -71.5596330275, -70.5587989992, -  
69.5579649708, -68.5571309425, -67.5562969141, -66.5554628857, -65.5546288574, -  
64.553794829, -63.5529608007, -62.5521267723, -61.551292744, -60.5504587156, -  
59.5496246872, -58.5487906589, -57.5479566305, -56.5471226022, -55.5462885738, -  
54.5454545455, -53.5446205171, -52.5437864887, -51.5429524604, -50.542118432, -  
49.5412844037, -48.5404503753, -47.539616347, -46.5387823186, -45.5379482902, -  
44.5371142619, -43.5362802335, -42.5354462052, -41.5346121768, -40.5337781485, -  
39.5329441201, -38.5321100917, -37.5312760634, -36.530442035, -35.5296080067, -  
34.5287739783, -33.52793995, -32.5271059216, -31.5262718932, -30.5254378649, -  
29.5246038365, -28.5237698082, -27.5229357798, -26.5221017515, -25.5212677231, -  
24.5204336947, -23.5195996664, -22.518765638, -21.5179316097, -20.5170975813, -  
19.516263553, -18.5154295246, -17.5145954962, -16.5137614679, -15.5129274395, -  
14.5120934112, -13.5112593828, -12.5104253545, -11.5095913261, -10.5087572977, -  
9.50792326939, -8.50708924103, -7.50625521268, -6.50542118432, -5.50458715596, -  
4.50375312761, -3.50291909925, -2.50208507089, -1.50125104254, -  
0.500417014179, 0.500417014178, 1.50125104254, 2.50208507089, 3.50291909925, 4.503753127  
61, 5.50458715596, 6.50542118432, 7.50625521268, 8.50708924103, 9.50792326939, 10.5087572  
977, 11.5095913261, 12.5104253545, 13.5112593828, 14.5120934112, 15.5129274395, 16.513761  
4679, 17.5145954962, 18.5154295246, 19.516263553, 20.5170975813, 21.5179316097, 22.518765  
638, 23.5195996664, 24.5204336947, 25.5212677231, 26.5221017515, 27.5229357798, 28.523769  
8082, 29.5246038365, 30.5254378649, 31.5262718932, 32.5271059216, 33.52793995, 34.5287739  
783, 35.5296080067, 36.530442035, 37.5312760634, 38.5321100917, 39.5329441201, 40.5337781  
485, 41.5346121768, 42.5354462052, 43.5362802335, 44.5371142619, 45.5379482902, 46.538782  
3186, 47.539616347, 48.5404503753, 49.5412844037, 50.542118432, 51.5429524604, 52.5437864  
887, 53.5446205171, 54.5454545455, 55.5462885738, 56.5471226022, 57.5479566305, 58.548790

6589, 59. 5496246872, 60. 5504587156, 61. 551292744, 62. 5521267723, 63. 5529608007, 64. 553794  
829, 65. 5546288574, 66. 5554628857, 67. 5562969141, 68. 5571309425, 69. 5579649708, 70. 558798  
9992, 71. 5596330275, 72. 5604670559, 73. 5613010842, 74. 5621351126, 75. 562969141, 76. 5638  
031693, 77. 5646371977, 78. 565471226, 79. 5663052544, 80. 5671392827, 81. 5679733111, 82. 5688  
073394, 83. 5696413678, 84. 5704753962, 85. 5713094245, 86. 5721434529, 87. 5729774812, 88. 573  
8115096, 89. 5746455379, 90. 5754795663, 91. 5763135947, 92. 577147623, 93. 5779816514, 94. 578  
8156797, 95. 5796497081, 96. 5804837364, 97. 5813177648, 98. 5821517932, 99. 5829858215, 100. 5  
8381985, 101. 584653878, 102. 585487907, 103. 586321935, 104. 587155963, 105. 587989992, 106. 5  
8882402, 107. 589658048, 108. 590492077, 109. 591326105, 110. 592160133, 111. 592994162, 112. 5  
9382819, 113. 594662219, 114. 595496247, 115. 596330275, 116. 597164304, 117. 597998332, 118. 5  
9883236, 119. 599666389, 120. 600500417, 121. 601334445, 122. 602168474, 123. 603002502, 124. 6  
0383653, 125. 604670559, 126. 605504587, 127. 606338616, 128. 607172644, 129. 608006672, 130. 6  
08840701, 131. 609674729, 132. 610508757, 133. 611342786, 134. 612176814, 135. 613010842, 136.  
613844871, 137. 614678899, 138. 615512927, 139. 616346956, 140. 617180984, 141. 618015013, 142  
. 618849041, 143. 619683069, 144. 620517098, 145. 621351126, 146. 622185154, 147. 623019183, 14  
8. 623853211, 149. 624687239, 150. 625521268, 151. 626355296, 152. 627189324, 153. 628023353, 1  
54. 628857381, 155. 62969141, 156. 630525438, 157. 631359466, 158. 632193495, 159. 633027523, 1  
60. 633861551, 161. 63469558, 162. 635529608, 163. 636363636, 164. 637197665, 165. 638031693, 1  
66. 638865721, 167. 63969975, 168. 640533778, 169. 641367807, 170. 642201835, 171. 643035863, 1  
72. 643869892, 173. 64470392, 174. 645537948, 175. 646371977, 176. 647206005, 177. 648040033, 1  
78. 648874062, 179. 64970809, 180. 650542118, 181. 651376147, 182. 652210175, 183. 653044204, 1  
84. 653878232, 185. 65471226, 186. 655546289, 187. 656380317, 188. 657214345, 189. 658048374, 1  
90. 658882402, 191. 65971643, 192. 660550459, 193. 661384487, 194. 662218515, 195. 663052544, 1  
96. 663886572, 197. 664720601, 198. 665554629, 199. 666388657, 200. 667222686, 201. 668056714,  
202. 668890742, 203. 669724771, 204. 670558799, 205. 671392827, 206. 672226856, 207. 673060884  
, 208. 673894912, 209. 674728941, 210. 675562969, 211. 676396997, 212. 677231026, 213. 67806505  
4, 214. 678899083, 215. 679733111, 216. 680567139, 217. 681401168, 218. 682235196, 219. 6830692  
24, 220. 683903253, 221. 684737281, 222. 685571309, 223. 686405338, 224. 687239366, 225. 688073  
394, 226. 688907423, 227. 689741451, 228. 69057548, 229. 691409508, 230. 692243536, 231. 693077  
565, 232. 693911593, 233. 694745621, 234. 69557965, 235. 696413678, 236. 697247706, 237. 698081  
735, 238. 698915763, 239. 699749791, 240. 70058382, 241. 701417848, 242. 702251877, 243. 703085  
905, 244. 703919933, 245. 704753962, 246. 70558799, 247. 706422018, 248. 707256047, 249. 708090  
075, 250. 708924103, 251. 709758132, 252. 71059216, 253. 711426188, 254. 712260217, 255. 713094  
245, 256. 713928274, 257. 714762302, 258. 71559633, 259. 716430359, 260. 717264387, 261. 718098  
415, 262. 718932444, 263. 719766472, 264. 7206005, 265. 721434529, 266. 722268557, 267. 7231025  
85, 268. 723936614, 269. 724770642, 270. 725604671, 271. 726438699, 272. 727272727, 273. 728106  
756, 274. 728940784, 275. 729774812, 276. 730608841, 277. 731442869, 278. 732276897, 279. 73311  
0926, 280. 733944954, 281. 734778982, 282. 735613011, 283. 736447039, 284. 737281068, 285. 7381  
15096, 286. 738949124, 287. 739783153, 288. 740617181, 289. 741451209, 290. 742285238, 291. 743  
119266, 292. 743953294, 293. 744787323, 294. 745621351, 295. 746455379, 296. 747289408, 297. 74  
8123436, 298. 748957465, 299. 749791493, 300. 750625521, 301. 75145955, 302. 752293578, 303. 75  
3127606, 304. 753961635, 305. 754795663, 306. 755629691, 307. 75646372, 308. 757297748, 309. 75  
8131776, 310. 758965805, 311. 759799833, 312. 760633862, 313. 76146789, 314. 762301918, 315. 76  
3135947, 316. 763969975, 317. 764804003, 318. 765638032, 319. 76647206, 320. 767306088, 321. 76  
8140117, 322. 768974145, 323. 769808173, 324. 770642202, 325. 77147623, 326. 772310259, 327. 77  
3144287, 328. 773978315, 329. 774812344, 330. 775646372, 331. 7764804, 332. 777314429, 333. 778  
148457, 334. 778982485, 335. 779816514, 336. 780650542, 337. 78148457, 338. 782318599, 339. 783  
152627, 340. 783986656, 341. 784820684, 342. 785654712, 343. 786488741, 344. 787322769, 345. 78  
8156797, 346. 788990826, 347. 789824854, 348. 790658882, 349. 791492911, 350. 792326939, 351. 7  
93160967, 352. 793994996, 353. 794829024, 354. 795663053, 355. 796497081, 356. 797331109, 357.  
798165138, 358. 798999166, 359. 799833194, 360. 800667223, 361. 801501251, 362. 802335279, 363  
. 803169308, 364. 804003336, 365. 804837364, 366. 805671393, 367. 806505421, 368. 80733945, 369  
. 808173478, 370. 809007506, 371. 809841535, 372. 810675563, 373. 811509591, 374. 81234362, 375  
. 813177648, 376. 814011676, 377. 814845705, 378. 815679733, 379. 816513761, 380. 81734779, 381  
. 818181818, 382. 819015847, 383. 819849875, 384. 820683903, 385. 821517932, 386. 82235196, 387  
. 823185988, 388. 824020017, 389. 824854045, 390. 825688073, 391. 826522102, 392. 82735613, 393  
. 828190158, 394. 829024187, 395. 829858215, 396. 830692244, 397. 831526272, 398. 8323603, 399.  
833194329, 400. 834028357, 401. 834862385, 402. 835696414, 403. 836530442, 404. 83736447, 405.  
838198499, 406. 839032527, 407. 839866555, 408. 840700584, 409. 841534612, 410. 842368641, 411



.843202669, 412.844036697, 413.844870726, 414.845704754, 415.846538782, 416.847372811, 417.848206839, 418.849040867, 419.849874896, 420.850708924, 421.851542952, 422.852376981, 423.853211009, 424.854045038, 425.854879066, 426.855713094, 427.856547123, 428.857381151, 429.858215179, 430.859049208, 431.859883236, 432.860717264, 433.861551293, 434.862385321, 435.863219349, 436.864053378, 437.864887406, 438.865721435, 439.866555463, 440.867389491, 441.86822352, 442.869057548, 443.869891576, 444.870725605, 445.871559633, 446.872393661, 447.87322769, 448.874061718, 449.874895746, 450.875729775, 451.876563803, 452.877397832, 453.87823186, 454.879065888, 455.879899917, 456.880733945, 457.881567973, 458.882402002, 459.88323603, 460.884070058, 461.884904087, 462.885738115, 463.886572143, 464.887406172, 465.8882402, 466.889074229, 467.889908257, 468.890742285, 469.891576314, 470.892410342, 471.89324437, 472.894078399, 473.894912427, 474.895746455, 475.896580484, 476.897414512, 477.89824854, 478.899082569, 479.899916597, 480.900750626, 481.901584654, 482.902418682, 483.903252711, 484.904086739, 485.904920767, 486.905754796, 487.906588824, 488.907422852, 489.908256881, 490.909090909, 491.909924937, 492.910758966, 493.911592994, 494.912427023, 495.913261051, 496.914095079, 497.914929108, 498.915763136, 499.916597164, 500.917431193, 501.918265221, 502.919099249, 503.919933278, 504.920767306, 505.921601334, 506.922435363, 507.923269391, 508.92410342, 509.924937448, 510.925771476, 511.926605505, 512.927439533, 513.928273561, 514.92910759, 515.929941618, 516.930775646, 517.931609675, 518.932443703, 519.933277731, 520.93411176, 521.934945788, 522.935779817, 523.936613845, 524.937447873, 525.938281902, 526.93911593, 527.939949958, 528.940783987, 529.941618015, 530.942452043, 531.943286072, 532.9441201, 533.944954128, 534.945788157, 535.946622185, 536.947456214, 537.948290242, 538.94912427, 539.949958299, 540.950792327, 541.951626355, 542.952460384, 543.953294412, 544.95412844, 545.954962469, 546.955796497, 547.956630525, 548.957464554, 549.958298582, 550.959132611, 551.959966639, 552.960800667, 553.961634696, 554.962468724, 555.963302752, 556.964136781, 557.964970809, 558.965804837, 559.966638866, 560.967472894, 561.968306922, 562.969140951, 563.969974979, 564.970809008, 565.971643036, 566.972477064, 567.973311093, 568.974145121, 569.974979149, 570.975813178, 571.976647206, 572.977481234, 573.978315263, 574.979149291, 575.979983319, 576.980817348, 577.981651376, 578.982485405, 579.983319433, 580.984153461, 581.98498749, 582.985821518, 583.986655546, 584.987489575, 585.988323603, 586.989157631, 587.98999166, 588.990825688, 589.991659716, 590.992493745, 591.993327773, 592.994161802, 593.99499583, 594.995829858, 595.996663887, 596.997497915, 597.998331943, 598.999165972, 600.0)

```
altd <- c(87)
x <- seq.int((length(p)-1)/2*-1, (length(p)-1)/2)
pdf('hpne_sorted_mdup_model.pdf', height=6, width=6)
plot(x, p, type='l', col=c('red'), main='Peak Model', xlab='Distance to the
middle', ylab='Percentage')
lines(x, m, col=c('blue'))
legend('topleft', c('forward tags', 'reverse tags'), lty=c(1,1,1), col=c('red', 'blue'))
plot(xcorr, ycorr, type='l', col=c('black'), main='Cross-Correlation', xlab='Lag between
+ and - tags', ylab='Correlation')
abline(v=altd, lty=2, col=c('red'))
legend('topleft', 'alternative lag(s)', lty=2, col='red')
legend('right', 'alt lag(s) : 87', bty='n')
dev.off()
```

```
==> ./sanchari/j455/runMacs.sh <==
```

```
#!/bin/bash
#$ -cwd
#$ -N macs2
#$ -j n
#$ -l h_vmem=9.8G
#$ -pe smp 1
#$ -S /bin/bash
#$ -m e
#$ -M kith.pradhan@einstein.yu.edu
```

```
#run mac2 peak finding software on a single target bam
#usually we need a control file, igg or input
```

```

#
#usage:
#qsub runMacs.sh bamfile.bam

BAM=$1
NAME=${BAM%. *}
FOL=macs_${NAME}

#module load MACS2/2.1.0/python.2.7.8
module load MACS2/2.1.0-update/python.2.7.8

echo $BAM
echo $NAME
echo $FOL

macs2 callpeak -f BAMPE -t $BAM -n $NAME --outdir $FOL --verbose 3
#macs2 callpeak -t $BAM -n $NAME --outdir $FOL --call-summits --verbose 3

==> ./sanchari/oxbs_atac/prepRandomSites.r <==
#read in a bed file
options(stringsAsFactors=F)

#sites = read.table("sites_hpne_all.bed", header=F)
sites = read.table("commonSites1_hpne.bed", header=F)

dim(sites)
head(sites)

#for each chrom
sites.all = lapply(unique(sites[,1]), function(chrom){
  ix = sites[,1] == chrom
  sites[ix,]
})
names(sites.all) = unique(sites[,1])
length(sites.all)

#for each chromosome write random sites between min and max
for (chrom in unique(sites[,1])){
  print(chrom)
  my.sites = sites.all[[chrom]]

  r1 = min(my.sites[,2])
  r2 = max(my.sites[,2])

  #range(min/max)
  rmy.sites = my.sites
  rmy.sites[,2] = sample(r1:r2, nrow(rmy.sites))
  rmy.sites[,3] = rmy.sites[,2]+1

  write.table(file="sites_rand_all.bed", x=rmy.sites, row.names=F, col.names=F,
quote=F, sep="\t", append=T)
}

#replace coordinates with random numbers in the same
r1 = min(sites.19[,2])

```

```

r2 = max(sites.19[,2])

#range(min/max)
rsites.19 = sites.19
rsites.19[,2] = sample(r1:r2, nrow(rsites.19))
rsites.19[,3] = rsites.19[,2]+1

#write new bed file
write.table(file="sites_rand_chr19.bed", x=rsites.19, row.names=F, col.names=F,
quote=F, sep="\t")

#prep sites that appear in one sample but not another.

sites.hpne = read.table("sites_hpne_all.bed", header=F)
sites.jd = read.table("sites_jd_all.bed", header=F)

sapply(paste0("chr",c(1:22,"X","Y")), function(chrom){
  in1 = (sites.hpne[sites.hpne[,1] == chrom,2] %in% sites.jd[sites.jd[,1] ==
chrom,2])
})

==> ./sanchari/oxbs_atac/plotPeakProfiles.py <==
import numpy as np
import matplotlib.pyplot as plt
import glob
import os
import sys
import HTSeq as ht
import numpy.random as rd
import multiprocessing as mp

#we want to count(and eventually plot) the stat3 peaks coinciding
#with variuos region sets
#promoter regions (TSS +/- 2kb)
#genebody regions, split by exons and introns
#pancreatic regions, peak bed files specified in the ENCODE databases

#step1. get the regions of interest
#1a. promoters are from the annotation table file

PROM_DIST=2000
#read in the annotation file. this was downloaded from the ucsc genome browser
anno = np.loadtxt("/home/kpradhan/Desktop/data/hg19/anno/annotation_hg19.gtf",
dtype=object)
anno[:5]
#regions lists will all be the same format
dt_sites = np.dtype [("chrom", "S4"), ("strand", "S1"), ("start", "int"), ("stop",
"int")]
x = [(str(a[1]), str(a[2]), int(a[3])-PROM_DIST, int(a[3])+PROM_DIST) for a in
anno]
sites_tss = np.unique(np.array(x, dtype=dt_sites))
sites_tss.shape

```

```

#1b. can get exons/introns from the same annotation file
#start and stop show the gene's full length
#exonStarts and exonStops will give the locations of the exons
#everything else between start and stop will be the introns
def getExonsIntrons(start, stop, exonStarts, exonStops):
    start = int(start)
    stop = int(stop)
    #split by comma
    exonStarts = map(int, exonStarts.rstrip(",").split(","))
    exonStops = map(int, exonStops.rstrip(",").split(","))
    #find all the exons
    exons = []
    for a, b in zip(exonStarts, exonStops):
        exons.append([a, b])
    #find the spots in between the exons
    introns = []
    #begin at the tss, not at the first exon
    curPos = start
    for exon in exons:
        if exon[0] - curPos > 0:
            introns.append([curPos, exon[0]])
        curPos = exon[1]
    #remember to check the last position
    if stop - curPos > 0:
        introns.append([curPos, stop])
    return exons, introns

#get a list of all the exons and introns
sites_exons = []
sites_introns = []
for a in anno:
    #get the boundaries of each exon and intron
    exons, introns = getExonsIntrons(a[3], a[4], a[8], a[9])
    #add the chromosome and strand info to the list
    for e in exons:
        sites_exons.append((str(a[1]), str(a[2]), e[0], e[1]))
    for i in introns:
        sites_introns.append((str(a[1]), str(a[2]), i[0], i[1]))
#turn them into numpy record arrays
sites_exons = np.unique(np.array(sites_exons, dtype=dt_sites))
sites_introns = np.unique(np.array(sites_introns, dtype=dt_sites))
sites_exons.shape
sites_introns.shape

#1c. load in the 6 bed files downloaded from encode
# #H3K27ac #H3K27me3 #H3K36me3 #H3K4me1 #H3K4me3 #H3K9me3
pancFolder = "/home/kpradhan/Desktop/data/pancreas"
pancFiles = glob.glob(pancFolder+"/*.bed.gz")

pfile= pancFiles[0]
def getPeakSitesFromBed(pfile):
    peaks = np.loadtxt(pfile, dtype=object)
    #regions lists will all be the same format
    dt_sites = np.dtype([("chrom", "S5"), ("strand", "S1"), ("start", "int"),
("stop", "int")])

```

```

    x = [(str(a[1]), str(a[2]), int(a[3])-PROM_DIST, int(a[3])+PROM_DIST) for a in
peaks]
    sites_tss = np.unique(np.array(x, dtype=dt_sites))

#pfile = "peaks_jd13d_stat3Input.txt"
def getPeakSitesFromMacs(pfile):
    peaks = np.loadtxt(pfile, dtype=object)
    #regions lists will all be the same format
    dt_sites = np.dtype [("chrom", "S5"), ("strand", "S1"), ("start", "int"),
("stop", "int")]
    x = []
    for a in peaks:
        #mid = (int(a[2]) + int(a[1])) / 2
        #x = [(str(a[0]), "+", mid-200, mid+200) for a in peaks]
        x.append( (str(a[0]), "+", int(a[1]), int(a[2])) )
    #only retain proper chromosomes
    x = np.unique(np.array(x, dtype=dt_sites))
    ix = np.array([a[:3] == "chr" or a == "X" or a == "Y" for a in x["chrom"]] )
    return x[ix]

#maybe only look at the peaks that pass a threshold
def getPeakMidsFromMacs(pfile, thresh=0):
    peaks = np.loadtxt(pfile, dtype=object)
    #regions lists will all be the same format
    dt_sites = np.dtype [("chrom", "S5"), ("strand", "S1"), ("site", "int")]
    x = []
    for a in peaks:
        if thresh == 0 or float(a[5]) > thresh:
            mid = (int(a[2]) + int(a[1])) / 2
            x.append((str(a[0]), "+", mid))
            #x.append( (str(a[0]), "+", int(a[1]), int(a[2])) )
    #only retain proper chromosomes
    x = np.unique(np.array(x, dtype=dt_sites))
    ix = np.array([a[:3] == "chr" or a == "X" or a == "Y" for a in x["chrom"]] )
    return x[ix]

#step2. get the read count profiles
#using the stat3 peaks
pfile = "peaks_jd13d_stat3Input.txt"
peaks_jd13d = getPeakSitesFromMacs(pfile)
peakmids_jd13d = getPeakMidsFromMacs(pfile)

peaks_jd13d = getPeakSitesFromMacs("peaks_jd13d_stat3Input.txt")
peaks_hpne = getPeakSitesFromMacs("peaks_hpne_stat3Input.txt")
peaks_jd13d.shape
peaks_hpne.shape

#count the number of peaks that fall in any of the regions
peaks = peaks_jd13d
sites = sites_tss
p = peaks[0]
s = sites[0]
peaks['chrom']
sites['chrom']

```

```

#peaks: X
#sites: chrX
def countOverlap(peaks, sites):
    count = 0
    #work chromosome by chrom
    for chrom in np.unique(peaks["chrom"]):
        ix1 = peaks["chrom"] == chrom
        ix2 = (sites['chrom'] == chrom) + (sites['chrom'] == "chr"+chrom)
        #does the peak region intersect any of the sites?
        A = peaks[ix1]["start"]
        B = peaks[ix1]["stop"]
        C = sites[ix2]["start"]
        D = sites[ix2]["stop"]
        for (a, b) in zip(A, B):
            count = count + np.sum((a <= D) * (C <= b))
    return count

#find the number of peaks that lay within boundaries of
# promoter regions
# gene exon regions
# gene intron regions
sites_tss.shape
sites_exons.shape
sites_introns.shape
countOverlap(peaks_jd13d, sites_tss)
countOverlap(peaks_jd13d, sites_exons)
countOverlap(peaks_jd13d, sites_introns)
countOverlap(peaks_hpne, sites_tss)
countOverlap(peaks_hpne, sites_exons)
countOverlap(peaks_hpne, sites_introns)

#for every site find the distribution of reads in
#the bam file that overlap the region centered at site
#assume the sites datastructure has a chr* name
#the bamfile might have chroms that look like "chr12" or "12"
bam = bams[0]
sites = peakmids_jd13d

class _exhausted():
    pass

def truncChr(c):
    if c.isdigit():
        return c
    elif c == "X" or c == "Y":
        return c
    else:
        return c[3:]

def getProfile(pos, bam, halfwinwidth=3000, noChr=False):
    peakProfile = np.zeros(2*halfwinwidth)
    sitechr = truncChr(pos["chrom"]) if noChr else pos["chrom"]
    window = ht.GenomicInterval( str(sitechr), pos["site"] - halfwinwidth,
    pos["site"] + halfwinwidth, str(pos["strand"]) )
    if (list(bam[window])):
        for almnt in bam[window]:
            if pos["strand"] == "+":
                a = almnt.iv.start - pos["site"] + halfwinwidth
                b = almnt.iv.end - pos["site"] + halfwinwidth

```

```

        if pos["strand"] == "-":
            a = pos["site"] + halfwinwidth - almnt.iv.end
            b = pos["site"] + halfwinwidth - almnt.iv.start
            peakProfile[a:b] += 1
    if (np.sum(peakProfile) > 0):
        return peakProfile
    else:
        return []

```

```

def getPeakProfiles_mt(bamfile, sites, halfwinwidth=3000, noChr = False):
    bam = ht.BAM_Reader(bamfile)
    #make sure the sites and bam files have same naming convention
    #
    #restrict sites to those that have an entry in the bam file
    bamChroms = [x["SN"] for x in bam.get_header_dict()["SQ"]]
    bamChroms = ["chr"+c if c.isdigit() else c for c in bamChroms]
    sites = sites[np.in1d(sites["chrom"], bamChroms)]
    sites.shape
    #
    peakProfs = []
    #collect the sites as genomic intervals
    pool = mp.Pool(processes=7)
    out = [pool.apply_async(getProfile, args=(pos, bam, halfwinwidth, noChr)) for
    pos in sites]
    peakProfs = [o.get() for o in out]
    #ignore the profiles with no reads
    peakProfs = [p for p in peakProfs if len(p) > 0]
    return np.array(peakProfs)

```

```

bamfile = "/home/kpradhan/Desktop/data/pancreas/test1/test3.bam"
def getPeakProfiles(bamfile, sites, halfwinwidth=3000, noChr = False):
    bam = ht.BAM_Reader(bamfile)
    #make sure the sites and bam files have same naming convention
    #
    #restrict sites to those that have an entry in the bam file
    bamChroms = [x["SN"] for x in bam.get_header_dict()["SQ"]]
    bamChroms = ["chr"+c if c.isdigit() else c for c in bamChroms]
    sites = sites[np.in1d(sites["chrom"], bamChroms)]
    sites.shape
    #
    peakProfs = []
    #collect the sites as genomic intervals
    for i, pos in enumerate(sites):
        peakProfile = np.zeros(2*halfwinwidth)
        if i % 1000 == 0:
            print "%d of %d" %(i, len(sites))
            sitechr = truncChr(pos["chrom"]) if noChr else pos["chrom"]
            window = ht.GenomicInterval( str(sitechr), pos["site"] - halfwinwidth,
pos["site"] + halfwinwidth, str(pos["strand"]) )
            if (list(bam[window])):
                for almnt in bam[window]:
                    if pos["strand"] == "+":
                        a = almnt.iv.start - pos["site"] + halfwinwidth
                        b = almnt.iv.end - pos["site"] + halfwinwidth
                    if pos["strand"] == "-":
                        a = pos["site"] + halfwinwidth - almnt.iv.end
                        b = pos["site"] + halfwinwidth - almnt.iv.start

```

```

        peakProfile[a:b] += 1
    if (np.sum(peakProfile) > 0):
        peakProfs.append(peakProfile)
return np.array(peakProfs)

def binPeakProfiles(peakProfs, K=100):
    sums = [np.sum(p) for p in peakProfs]
    ix = np.argsort(sums)
    #
    #bin every 100 rows together
    smallX = []
    for i in range(0, len(peakProfs)-1, K):
        smallX.append(np.sum(np.array([peakProfs[j] for j in ix[i:(i+K)]]),0))
    return np.array(smallX)[::-1]

peakmids_jd13d = getPeakMidsFromMacs(pfile)
sites=peakmids_jd13d
def makePeakPlots(sites, bamfile, outfile, noChr=False):
    peakProfs = getPeakProfiles(bamfile, sites, 3000, noChr)
    #
    prof = np.sum(peakProfs, 0)
    smallPeaks = binPeakProfiles(peakProfs, K=100)
    x = smallPeaks.ravel()
    vmax = np.sort(x)[np.round(len(x)*.80)]
    #
    plt.close()
    fig = plt.figure()
    fig.suptitle(outfile)
    ax = plt.subplot(121)
    xran = np.arange(len(prof))-3000
    plt.plot(xran[500:(-500)], prof[500:(-500)])
    ax = plt.subplot(122)
    ax.set_xticklabels([])
    ax.set_yticklabels([])
    plt.imshow(smallPeaks[:, 500:(-500)], aspect = "auto", vmax=vmax)
    #plt.colorbar(orientation="horizontal")
    plt.colorbar(orientation="vertical")
    plt.savefig(outfile)
    plt.close()

def clipFilename(ffile):
    return ffile[(ffile.rfind("/")+1):]

pfile = "peaks_jd13d_stat3Input.txt"
pancBamFolder = "/home/kpradhan/Desktop/data/pancreas/sorted/hacked"
sites_jd13d = getPeakMidsFromMacs(pfile)
sites_jd13d_q3 = getPeakMidsFromMacs(pfile, 3)
sites_jd13d_q3.shape

bams = glob.glob(pancBamFolder+"/*.bam")
for bamfile in bams:
    outfile = "jd13dStat3Peaks_q3_"+clipFilename(bamfile)+".png"
    makePeakPlots_mt(sites_jd13d_q3, bamfile, outfile)

bams = glob.glob(pancBamFolder+"/*.bam")

```



```

for bamfile in bams:
    outfile = "jd13dStat3Peaks_q3_"+clipFilename(bamfile)+".png"
    makePeakPlots(sites_jd13d, bamfile, outfile)

rsites = getRandomPeaks(sites_jd13d)
bams = glob.glob(pancBamFolder+"/*.bam")
for bamfile in bams:
    outfile = "randomPeaks_"+clipFilename(bamfile)+".png"
    makePeakPlots(rsites, bamfile, outfile)

def getRandomPeaks(sites):
    #get max sizes for each chromosome
    chroms = np.unique(sites["chrom"])
    nSites = {}
    maxSize = {}
    minSize = {}
    for chrom in chroms:
        nSites[chrom] = np.sum(sites["chrom"] == chrom)
        maxSize[chrom] = np.max(sites[sites["chrom"] == chrom]["site"])
        minSize[chrom] = np.min(sites[sites["chrom"] == chrom]["site"])
    #randomly sample peaks.
    rsites = sites.copy()
    for chrom in chroms:
        s = np.sort(rd.random_integers(minSize[chrom], maxSize[chrom],
size=nSites[chrom]))
        for i, ix in enumerate(np.where(rsites["chrom"] == chrom)[0]):
            rsites[ix]["site"] = s[i]
    return rsites

#####
#get the peak call from the h3k encode beds
pfile =
"/media/kpradhan/DATAPART1/data/pancreas/encodePeaks/pancreas/pancreas_distal.H3K4m
e1.bed"
sites_d = getPeakMidsFromMacs(pfile)
pfile =
"/media/kpradhan/DATAPART1/data/pancreas/encodePeaks/pancreas/pancreas_proximal.H3K
4me1.bed"
sites_p = getPeakMidsFromMacs(pfile)
sites.shape
bfile =
"/home/kpradhan/Desktop/data/sanchari/pancreatic/stat3_chipseq/J179/bwa/JD13D-
STAT3.bwa.sorted.mkdup.bam"

pfiles =
glob.glob("/media/kpradhan/DATAPART1/data/pancreas/encodePeaks/pancreas/*.bed")
bfiles =
glob.glob("/home/kpradhan/Desktop/data/sanchari/pancreatic/stat3_chipseq/J179/bwa/*
.bam")
for bfile in bfiles:
    for pfile in pfiles:
        sites = getPeakMidsFromMacs(pfile)
        outfile = "colocPlot_"+clipFilename(pfile)+"_"+clipFilename(bfile)+".png"
        makePeakPlots(sites, bfile, outfile, noChr=True)

#do the merged prox dist peaks

```

```

for bfile in bfiles:
    for i in range(3):
        sites = np.hstack((getPeakMidsFromMacs(pfiles[i]),
getPeakMidsFromMacs(pfiles[i+3])))
        outfile = "colocPlot_"+clipFilename(pfiles[i])+clipFilename(pfiles[i+3])
+"_"+clipFilename(bfile)+".png"
        makePeakPlots(sites, bfile, outfile, noChr=True)

peakProfs_p = getPeakProfiles(bfile, sites_p, 3000, noChr=True)
peakProfs_d = getPeakProfiles(bfile, sites_d, 3000, noChr=True)
prof = np.sum(peakProfs, 0)
profd = np.sum(peakProfs_d, 0)
plt.plot(prof, label="prox")
plt.plot(profd, label="distal")
plt.legend()

#####3
bamfile1 =
"/home/kpradhan/Desktop/data/sanchari/pancreatic/stat3_chipseq/J179/bwa/jd13stat3_q
10.bam"
bamfile2 =
"/home/kpradhan/Desktop/data/sanchari/pancreatic/stat3_chipseq/J179/bwa/JD13D-
STAT3.bwa.sorted.mkdup.bam"
bamfile2 =
"/home/kpradhan/Desktop/data/sanchari/pancreatic/stat3_chipseq/J179/bwa/HPNE-
Input.bwa.sorted.mkdup.bam"

sites_jd13d_p001 = getPeakMidsFromMacs(pfile, 3)
sites_jd13d = getPeakMidsFromMacs(pfile)
sites_jd13d_p001.shape
sites_jd13d.shape
peakProfs1 = getPeakProfiles(bamfile1, sites_jd13d, 3000, noChr=True)
peakProfs2 = getPeakProfiles(bamfile2, sites_jd13d, 3000, noChr=True)
prof1 = np.sum(peakProfs1, 0)
prof2 = np.sum(peakProfs2, 0)
plt.plot(prof1, label="stat3 q10")
plt.plot(prof2, label="stat3")
plt.legend()
#input has a vally
#stat3 has a mountain

bamfile =
"/home/kpradhan/Desktop/data/pancreas/sorted/hacked/hacked_sorted_GSM906419_UCSD.Pa
ncreas.Input.STL003.bam"
peakProfs = getPeakProfiles_mt(bamfile, sites_jd13d_q3, 3000)

bamfile =
"/home/kpradhan/Desktop/data/pancreas/sorted/hacked/hacked_sorted_GSM906419_UCSD.Pa
ncreas.Input.STL003.bam"
bamfile = bams[0]
peakProfs = getPeakProfiles(bamfile, sites_jd13d, 3000)
rProfs = getPeakProfiles(bamfile, rsites, 3000)

prof = np.sum(peakProfs, 0)

```

```

rprof = np.sum(rProfs, 0)
smallPeaks = binPeakProfiles(peakProfs, K=100)
rsmallPeaks = binPeakProfiles(rProfs, K=100)

plt.plot(prof)

plt.hist(smallPeaks.ravel(), 1000)
x = smallPeaks.ravel()
rx = rsmallPeaks.ravel()
vmax = np.sort(x)[np.round(len(x)*.80)]
rvmax = np.sort(rx)[np.round(len(rx)*.80)]

plt.close()
fig = plt.figure()
#fig.suptitle("\n".join(map(clipFilename, [hmcfile, bamfile])))
ax = plt.subplot(121)
xran = np.arange(len(prof))-3000
plt.plot(xran[500:(-500)], rprof[500:(-500)])
#plt.plot(xran[500:(-500)], prof[500:(-500)])
ax = plt.subplot(122)
ax.set_xticklabels([])
ax.set_yticklabels([])
plt.imshow(rsmallPeaks[:, 500:(-500)], aspect = "auto", vmax=rvmax)
#plt.imshow(smallPeaks[:, 500:(-500)], aspect = "auto", vmax=vmax)
plt.colorbar(orientation="horizontal")
plt.colorbar(orientation="vertical")
plt.savefig(outfile)
plt.close()

np
plt.imshow(smallPeaks[:, 500:(-500)], aspect = "auto", vmax=vmax)
plt.plot(prof[500:(-500)])
plt.plot(prof)

#is it possible to load the panc bed files as a bam or wig?
wig =
ht.WiggleReader("/home/kpradhan/Desktop/data/pancreas/GSM910576_UCSD.Pancreas.H3K4m
e1.STL003.wig.gz")
window = ht.GenomicInterval( "chr1", 10000, 20000000, "+" )
list(wig[window])
    if (list(bam[window])):
        for almnt in bam[window]:

==> ./sanchari/oxbs_atac/commands1.sh <==
ngsplotdb.py list

tss, tes, genebody, exon, cgi, enhancer, dhs
testbam=/home/kpradhan/Desktop/hpc_home/projects/sanchari/j455_j515/jd_sorted_mdup_
merged.bam
ngs.plot.r -G hg19 -R tss -C $testbam -O test1plot_tss -T testplot -L 3000
ngs.plot.r -G hg19 -R genebody -C $testbam -O test1plot_genebody -T testplot -L
3000
ngs.plot.r -G hg19 -R exon -C $testbam -O test1plot_exon -T testplot -L 3000
ngs.plot.r -G hg19 -R enhancer -C $testbam -O test1plot_enhancer -T testplot -L

```

```

3000
ngs.plot.r -G hg19 -R dhs -C $testbam -O test1plot_dhs -T testplot -L 3000

#make a test bed file
#chr start stop
ls ../..

#prepare the hmc site bed files for jd and hpne
tail -n +2 ../j432_j446/hmcSites/hmcSites_HPNE_all.txt | sed 's///g' | awk '{print
$1,"\t",$2,"\t",$2+1}' | sed 's/ //'g >| sites_hpne_all.bed
tail -n +2 ../j432_j446/hmcSites/hmcSites_JD_all.txt | sed 's///g' | awk '{print
$1,"\t",$2,"\t",$2+1}' | sed 's/ //'g >| sites_jd_all.bed

#prepare a list of random sites

#some smaller single chrom beds
tail -n +2 ../j432_j446/hmcSites/hmcSites_HPNE_10.txt | sed 's///g' | awk '{print
$1,"\t",$2-2000,"\t",$2+2000}' | sed 's/ //'g >| s10.bed
tail -n +2 ../j432_j446/hmcSites/hmcSites_HPNE_10.txt | sed 's///g' | awk '{print
$1,"\t",$2,"\t",$2+1}' | sed 's/ //'g >| s10.bed
time ngs.plot.r -G hg19 -R bed -E s10.bed -C $bam -O test2plot_bed -T testplot -P 6
-L 3000

#prepare bed files for chr19
tail -n +2 ../j432_j446/hmcSites/hmcSites_HPNE_all.txt | sed 's///g' | awk '{print
$1,"\t",$2,"\t",$2+1}' | sed 's/ //'g | grep -e "chr19" >| sites_hpne_19.bed
tail -n +2 ../j432_j446/hmcSites/hmcSites_JD_all.txt | sed 's///g' | awk '{print
$1,"\t",$2,"\t",$2+1}' | sed 's/ //'g | grep -e "chr19" >| sites_jd_19.bed

bam1=/home/kpradhan/Desktop/hpc_home/projects/sanchari/j455/hpne_sorted_mdup.bam
#bam2=/home/kpradhan/Desktop/hpc_home/projects/sanchari/j455/jd_sorted_mdup.bam
bam2=/home/kpradhan/Desktop/hpc_home/projects/sanchari/j455_j515/jd_sorted_mdup_mer
ged.bam
#time ngs.plot.r -G hg19 -R bed -E sites_hpne_19.bed -C $bam1 -O hpne_19 -T hpne_19
-P 6 -L 3000
#cat test1_jdbad.txt | awk '{printf("%s\t%d\t%d\t%s\n", $1, $2, $2+1, $3)}' >
test2_jdbad.txt
#cat test1_jdmc.txt | awk '{printf("%s\t%d\t%d\t%s\n", $1, $2, $2+1, $3)}' >
test2_jdmc.txt
#cat test1_jdmc_top10k.txt | awk '{printf("%s\t%d\t%d\t%s\n", $1, $2, $2+1, $3)}' >
test2_jdmc_top10k.txt
#cat test1_jdmc_top20k-10k.txt | awk '{printf("%s\t%d\t%d\t%s\n", $1, $2, $2+1,
$3)}' >| test2_jdmc_top20k-10k.txt
#cat test1_jdmc_top30k-10k.txt | awk '{printf("%s\t%d\t%d\t%s\n", $1, $2, $2+1,
$3)}' >| test2_jdmc_top30k-10k.txt
cat test1_jdmc_top60k-10k.txt | awk '{printf("%s\t%d\t%d\t%s\n", $1, $2, $2+1,
$3)}' >| test2_jdmc_top60k-10k.txt
cat test1_jdmc_top100k.txt | awk '{printf("%s\t%d\t%d\t%s\n", $1, $2, $2+1, $3)}'
>| test2_jdmc_top100k.txt
cut -f1-3 test2_jdmc_top30k-10k.txt > test3_jdmc_top30k-10k.txt
sed test2_jdmc_top30k-10k.txt -e 's/+/-/' > test4_jdmc_top30k-10k.txt
time ngs.plot.r -G hg19 -R bed -E sites_jd_19.bed -C $bam2 -O jd_19 -T jd_19 -P 6
-L 3000
time ngs.plot.r -G hg19 -R bed -E test2_jdhmc.txt -C $bam2 -O jd_test1 -T jd_test
-P 6 -L 3000
time ngs.plot.r -G hg19 -R bed -E test2_jdmc.txt -C $bam2 -O jd_mc_test1 -T

```

```

jd_mc_test -P 6 -L 3000
time ngs.plot.r -G hg19 -R bed -E test2_jdmc_top10k.txt -C $bam2 -O jdmc_top10k.txt
-T jdmc_top10k.txt -P 6 -L 3000
time ngs.plot.r -G hg19 -R bed -E test2_jdmc_top20k-10k.txt -C $bam2 -O top20k-10k
-T jdmc_top20k-10k.txt -P 6 -L 3000
time ngs.plot.r -G hg19 -R bed -E test3_jdmc_top30k-10k.txt -C $bam2 -O top30k-
10k_v2 -T jdmc_top30k-10k_v2 -P 6 -L 3000
time ngs.plot.r -G hg19 -R bed -E test4_jdmc_top30k-10k.txt -C $bam2 -O top30k-
10k_v4 -T jdmc_top30k-10k_v4 -P 6 -L 3000
time ngs.plot.r -G hg19 -R bed -E test2_jdmc_top60k-10k.txt -C $bam2 -O
jdmc_top60k-10k -T jdmc_top60k-10k -P 6 -L 3000
time ngs.plot.r -G hg19 -R bed -E test2_jdmc_top100k.txt -C $bam2 -O jdmc_100k -T
jdmc_100k -P 6 -L 3000
time ngs.plot.r -G hg19 -R bed -E test2_jdbad.txt -C $bam2 -O jdbad_test1 -T
jdbad_test -P 6 -L 3000

```

```

time ngs.plot.r -G hg19 -R bed -E sites_rand_chr19.bed -C config1.txt -O jd_rand19
-T jd_rand19 -P 6 -L 3000
time ngs.plot.r -G hg19 -R bed -C config2.txt -O jd_batch -T jd_batch -P 6 -L 3000

```

```

#prepare the hmcSite bed file from the common4 hmcSites.
#TODO: messed up JD common sites bed..must redo
cat ../j432_j446/hmcSites/common4_hmcSites_JD.txt | cut -f1,2 | sed 's/#//' | \
awk '{print $1,"\t",$2-1000,"\t",$2+1000}' | sed 's/ //'g >| commonSites_jd.bed
cat ../j432_j446/hmcSites/common4_hmcSites_HPNE.txt | cut -f1,2 | sed 's/#//' | \
awk '{print $1,"\t",$2-1000,"\t",$2+1000}' | sed 's/ //'g >|
commonSites_hpne.bed

```

#dont' forget to take out spaces.

#ngsplot only works with tabs

```

cat ../j432_j446/hmcSites/common4_hmcSites_JD.txt | cut -f1,2 | sed 's/#//' | \
awk '{print $1,"\t",$2,"\t",$2+1}' | sed 's/ //'g >| commonSites1_jd.bed
cat ../j432_j446/hmcSites/common4_hmcSites_HPNE.txt | cut -f1,2 | sed 's/#//' | \
awk '{print $1,"\t",$2,"\t",$2+1}' | sed 's/ //'g >| commonSites1_hpne.bed

```

```

time ngs.plot.r -S 0.1 -G hg19 -R bed -E commonSites1_hpne.bed -C $bam1 -O hpne_all
-T hpne_all -P 2 -L 3000
#time ngs.plot.r -S 0.01 -G hg19 -R bed -E commonSites1_hpne.bed -C $bam2 -O
jdBam_hpneSites_all -T jdBam_hpneSites_0.01_all -P 6 -L 3000
time ngs.plot.r -S 0.1 -G hg19 -R bed -E commonSites1_jd.bed -C $bam2 -O jd_all -T
jd_all -P 2 -L 3000

```

```

time ngs.plot.r -S 0.01 -G hg19 -R bed -C config1.txt -O atacSeqBatch -T
atacSeqBatch -P 6 -L 3000

```

```

bam1=/home/kpradhan/Desktop/hpc_home/projects/sanchari/j455/hpne_sorted_mdup.bam
bam2=/home/kpradhan/Desktop/hpc_home/projects/sanchari/j455_j515/jd_sorted_mdup_mer
ged.bam

```

#try it with a more significant set of hmc values

```

cat ../j432_j446/hmcSites/common4_hmcSites_JD.txt | cut -f1,2,8 | sed 's/#//' | \
awk '{if ($3 < 0.01) print $1,"\t",$2,"\t",$2+1}' | sed 's/ //'g >|
hmc_sig0.01_commonSites1_jd.bed
cat ../j432_j446/hmcSites/common4_hmcSites_HPNE.txt | cut -f1,2,8 | sed 's/#//' | \
awk '{if ($3 < 0.01) print $1,"\t",$2,"\t",$2+1}' | sed 's/ //'g >|

```

```
hmc_sig0.01_commonSites1_hpne.bed
```

```
time ngs.plot.r -G hg19 -R bed -E hmc_sig0.01_commonSites1_hpne.bed -C $bam1 -O  
hmc_sig0.01_hpne_all -T hmc_sig0.01_hpne_all -P 2 -L 3000  
time ngs.plot.r -G hg19 -R bed -E hmc_sig0.01_commonSites1_jd.bed -C $bam2 -O  
hmc_sig0.01_jd_all -T hmc_sig0.01_jd_all -P 2 -L 3000
```

```
#prepare bed files for the stat3 peaks
```

```
bam1=/home/kpradhan/Desktop/hpc_home/projects/sanchari/j455/hpne_sorted_mdup.bam  
bam2=/home/kpradhan/Desktop/hpc_home/projects/sanchari/j455_j515/jd_sorted_mdup_mer  
ged.bam
```

```
time ngs.plot.r -G hg19 -R bed -E hpne_stat3_summits.bed -C $bam1 -O  
hpne_stat3Peaks_atac -T hpne_stat3Peaks_atac -P 2 -L 3000  
time ngs.plot.r -G hg19 -R bed -E jd13d_stat3_summits.bed -C $bam2 -O  
jd_stat3Peaks_atac -T jd_stat3Peaks_atac -P 2 -L 3000
```

```
#make plots for the MC sites
```

```
#####
```

```
#dont' forget to take out spaces.
```

```
#ngsplot only works with tabs
```

```
cat ../j432_j446/hpc_mcSites/common4_mcSites_JD.txt | cut -f1,2 | sed 's/#//' | \  
awk '{print $1,"\t",$2,"\t",$2+1}' | sed 's/ //'g >| mc_commonSites1_jd.bed  
cat ../j432_j446/hpc_mcSites/common4_mcSites_HPNE.txt | cut -f1,2 | sed 's/#//' | \  
awk '{print $1,"\t",$2,"\t",$2+1}' | sed 's/ //'g >| mc_commonSites1_hpne.bed
```

```
bam1=/home/kpradhan/Desktop/hpc_home/projects/sanchari/j455/hpne_sorted_mdup.bam  
bam2=/home/kpradhan/Desktop/hpc_home/projects/sanchari/j455_j515/jd_sorted_mdup_mer  
ged.bam
```

```
time ngs.plot.r -S 0.05 -G hg19 -R bed -E mc_commonSites1_hpne.bed -C $bam1 -O  
mc_hpne_0.05_all -T mc_hpne_0.05_all -P 2 -L 3000  
time ngs.plot.r -S 0.05 -G hg19 -R bed -E mc_commonSites1_jd.bed -C $bam2 -O  
mc_jd_0.05_all -T mc_jd_0.05_all -P 2 -L 3000
```

```
time ngs.plot.r -S 0.01 -G hg19 -R bed -E mc_commonSites1_jd.bed -C $bam2 -O  
mc_jd_0.01_all -T mc_jd_0.01_all -P 3 -L 3000  
time ngs.plot.r -S 0.01 -G hg19 -R bed -E mc_commonSites1_hpne.bed -C $bam1 -O  
mc_hpne_0.01_all -T mc_hpne_0.01_all -P 3 -L 3000
```

```
time ngs.plot.r -S 0.1 -G hg19 -R bed -E commonSites1_jd.bed -C $bam2 -O  
hmc_jd_0.1_all -T hmc_jd_0.1_all -P 3 -L 3000  
time ngs.plot.r -S 0.1 -G hg19 -R bed -E commonSites1_hpne.bed -C $bam1 -O  
hmc_hpne_0.1_all -T hmc_hpne_0.1_all -P 3 -L 3000
```

```
#try to do the same with RNA seq data
```

```
bam1=/home/kpradhan/Desktop/data/sanchari/pancreatic/rnaseq/bam/HPNE.AC1FL7ACXX.lan  
e_1_P0_I5.hg19.gsnap-rna-alignment.bam  
bam2=/home/kpradhan/Desktop/data/sanchari/pancreatic/rnaseq/bam/JRN.AD0C99ABXX.lane
```

\_8\_P0\_I2.hg19.gsnap-rna-alignment.bam

```
samtools index $bam1
samtools index $bam2
```

```
time ngs.plot.r -S 0.01 -G hg19 -R bed -E mc_commonSites1_hpne.bed -C $bam1 -O
mc_rna_hpne_0.01_all -T mc_rna_hpne_0.01_all -P 2 -L 3000
time ngs.plot.r -S 0.01 -G hg19 -R bed -E mc_commonSites1_jd.bed -C $bam2 -O
mc_rna_jd_0.01_all -T mc_rna_jd_0.01_all -P 2 -L 3000
time ngs.plot.r -RR 300 -S 0.05 -G hg19 -R bed -E mc_commonSites1_hpne.bed -C $bam1
-O mc_rna_hpne_0.05_all -T mc_rna_hpne_0.05_all -P 2 -L 3000
time ngs.plot.r -RR 300 -S 0.05 -G hg19 -R bed -E mc_commonSites1_jd.bed -C $bam2
-O mc_rna_jd_0.05_all -T mc_rna_jd_0.05_all -P 2 -L 3000
```

```
#filter out mitochondria
samtools idxstats input.bam | cut -f 1 | grep -v MT | xargs samtools view -b
input.bam > output.bam
```

```
#get the numbe of good reads
```

```
#3844
#read unmapped
#not primary alignment
#read fails platform/vendor quality checks
#read is PCR or optical duplicate
#supplementary alignment
#64
#first in pair
samtools view -f 64 -F 3844 -c $bam1
samtools view -f 64 -F 3844 -c $bam1 chrM
samtools view -f 64 -F 3844 -c $bam2
samtools view -f 64 -F 3844 -c $bam2 chrM
```

```
==> ./sanchari/j446/clipOverlaps.sh <==
```

```
#!/bin/bash
#$ -cwd
#$ -j n
#$ -l h_vmem=4G
#$ -pe smp 1
#$ -S /bin/bash
#$ -m e
#$ -M kith.pradhan@einstein.yu.edu
module load samtools/1.2/gcc.4.4.7
module load bamUtil/1.0.13/gcc.4.4.7
```

```
bam=$1
bname="${bam%. *}"
```

```
bam clipOverlap --in $bam --out ${bname}_clip.bam
```

```
samtools index ${bname}_clip.bam
```

```
==> ./sanchari/j446/processFiles1.sh <==
```

```
#step 1: split each file into 40M line chunks
```

```
mkdir split
```

```
NL=40000000
```

```
for fq in `ls *.fq.gz`;
```

```
do
```

```
    nam=`basename $fq .gz`
```

```
    #get name without extension
```

```
    #echo $fq
```

```
    #echo $nam
```

```
    echo "split <(zcat $fq) -d -a 3 -l $NL split/${nam}.pt"
```

```
done >| split1.sh
```

```
chmod +x split1.sh
```

```
#step 2: run bismark on the split files
```

```
# and sort the resulting bam
```

```
mkdir bismark
```

```
cd bismark
```

```
for fq1 in `ls ../split/*1_val_1*`;
```

```
do
```

```
    fq2=`echo $fq1 | sed 's/\(.*\)1_val_1\(.*\)\/\12_val_2\/'`
```

```
    pname=`echo $fq1 | sed 's/.*\/\(.*\).1_val_1.fq.\(p.*\)\/\1\/'`
```

```
    #echo $fq1
```

```
    #echo $fq2
```

```
    #echo $pname
```

```
    qsub ../runBismark.sh $pname $fq1 $fq2
```

```
done
```

```
#step 3. merge the bams together
```

```
mkdir merged
```

```
cd merged
```

```
qsub ../mergeBams.sh J446_AHLT3HBCXX_Lane1_ACAGTG_HPNE-1-BS_merged_sorted.bam
```

```
../bismark/*HPNE-1-BS_p*_sorted.bam
```

```
qsub ../mergeBams.sh J446_AHLT3HBCXX_Lane2_GCCAAT_HPNE-1-
```

```
OxBS_merged_sorted.bam ../bismark/*HPNE-1-OxBS_p*_sorted.bam
```

```
qsub ../mergeBams.sh J446_BHLYGMBCXX_Lane1_CTTGTA_JD-BS_merged_sorted.bam
```

```
../bismark/*JD-BS_p*_sorted.bam
```

```
qsub ../mergeBams.sh J446_BHLYGMBCXX_Lane2_GTGAAA_JD-OxBS_merged_sorted.bam
```

```
../bismark/*JD-OxBS_p*_sorted.bam
```

```
#step 4. mark duplicates
```

```
qsub ../markDuplicates.sh J446_AHLT3HBCXX_Lane1_ACAGTG_HPNE-1-BS_merged_sorted.bam
```

```
qsub ../markDuplicates.sh J446_AHLT3HBCXX_Lane2_GCCAAT_HPNE-1-
```

```
OxBS_merged_sorted.bam
```

```
qsub ../markDuplicates.sh J446_BHLYGMBCXX_Lane1_CTTGTA_JD-BS_merged_sorted.bam
```

```
qsub ../markDuplicates.sh J446_BHLYGMBCXX_Lane2_GTGAAA_JD-OxBS_merged_sorted.bam
```

```
#step 5. clip overlap
```

```
qsub ../clipOverlaps.sh J446_AHLT3HBCXX_Lane1_ACAGTG_HPNE-1-
```

```
BS_merged_sorted_mdup.bam
```

```
qsub ../clipOverlaps.sh J446_AHLT3HBCXX_Lane2_GCCAAT_HPNE-1-
```

```
OxBS_merged_sorted_mdup.bam
```

```
qsub ../clipOverlaps.sh J446_BHLYGMBCXX_Lane1_CTTGTA_JD-BS_merged_sorted_mdup.bam
```

```
qsub ../clipOverlaps.sh J446_BHLYGMBCXX_Lane2_GTGAAA_JD-OxBS_merged_sorted_mdup.bam
```



```
#step 6. methylation report generation
qsub ../reportMeth.sh J446_AHLT3HBCXX_Lane1_ACAGTG_HPNE-1-
BS_merged_sorted_mdup_clip.bam
qsub ../reportMeth.sh J446_AHLT3HBCXX_Lane2_GCCAAT_HPNE-1-
OxBS_merged_sorted_mdup_clip.bam
qsub ../reportMeth.sh J446_BHLYGMBCXX_Lane1_CTTGTA_JD-
BS_merged_sorted_mdup_clip.bam
qsub ../reportMeth.sh J446_BHLYGMBCXX_Lane2_GTGAAA_JD-
OxBS_merged_sorted_mdup_clip.bam
```

```
==> ./sanchari/j446/runBismark.sh <==
```

```
#!/bin/bash
#$ -cwd
#$ -N bismark_alignment
#$ -j n
#$ -l h_vmem=5.8G
#$ -pe smp 3
#$ -S /bin/bash
#$ -m e
#$ -M kith.pradhan@einstein.yu.edu

#process a chunk of reads
#
#usage:
#qsub runBismark.sh hpneBs reads1.fastq.gz reads2.fastq.gz
```

```
SNAME=$1
FQ1=$2
FQ2=$3
REF=/home/kpradha1/projects/hg19/
```

```
module load bismark/0.14.5
module load bowtie2/2.2.3/gcc.4.4.7
module load samtools/1.2/gcc.4.4.7
module load picard-tools/1.92/java.1.8.0_20
```

```
bismark --multicore 1 --bowtie2 -p 2 $REF -1 $FQ1 -2 $FQ2
java -jar $(which SortSam.jar) INPUT=${FQ1##*/}_bismark_bt2_pe.bam OUTPUT=${
{SNAME}_sorted.bam SO=coordinate CREATE_INDEX=true
echo "done" > $SNAME.status
```

```
==> ./sanchari/j446/markDuplicates.sh <==
```

```
#!/bin/bash
#$ -cwd
#$ -j n
#$ -l h_vmem=4G
#$ -pe smp 4
#$ -S /bin/bash
#$ -m e
#$ -M kith.pradhan@einstein.yu.edu
module load samtools/1.2/gcc.4.4.7
module load picard-tools/1.92/java.1.8.0_20
```

```
bam=$1
```

```
bname="${bam%. *}"
```

```
java -jar $(which BuildBamIndex.jar) INPUT=${bam}  
java -jar $(which MarkDuplicates.jar) INPUT=${bam} OUTPUT=${bname}_mdup.bam  
METRICS_FILE=${bname}_mdMetric.txt  
java -jar $(which BuildBamIndex.jar) INPUT=${bname}_mdup.bam
```

```
==> ./sanchari/j446/dlfiles1.sh <==
```

```
wget http://waspsystem.einstein.yu.edu/wsfile/get/file/b3469e61-ce36-4849-b95c-  
36c8376171bc/J446_AHLT3HBCXX_Lane1_ACAGTG_HPNE-1-BS.1_val_1.fq.gz  
wget http://waspsystem.einstein.yu.edu/wsfile/get/file/5fa39bfa-b203-4978-8d64-  
5161a327791f/J446_AHLT3HBCXX_Lane1_ACAGTG_HPNE-1-BS.2_val_2.fq.gz  
wget http://waspsystem.einstein.yu.edu/wsfile/get/file/b8527954-c75d-4626-9677-  
aea3eb499cfc/J446_AHLT3HBCXX_Lane2_GCCAAT_HPNE-1-0xBS.1_val_1.fq.gz  
wget http://waspsystem.einstein.yu.edu/wsfile/get/file/bd34b329-4b0b-4147-b1f3-  
e9f9834e6989/J446_AHLT3HBCXX_Lane2_GCCAAT_HPNE-1-0xBS.2_val_2.fq.gz  
wget http://waspsystem.einstein.yu.edu/wsfile/get/file/a47b6a91-3f9b-4edd-a2bd-  
e2756b2dcedc/J446_BHLYGMBCXX_Lane1_CTTGTA_JD-BS.1_val_1.fq.gz  
wget http://waspsystem.einstein.yu.edu/wsfile/get/file/b5390735-036d-435a-b43c-  
743fa04829a7/J446_BHLYGMBCXX_Lane1_CTTGTA_JD-BS.2_val_2.fq.gz  
wget http://waspsystem.einstein.yu.edu/wsfile/get/file/919729fc-5ecc-43ea-8a54-  
65c694185b71/J446_BHLYGMBCXX_Lane2_GTGAAA_JD-0xBS.1_val_1.fq.gz  
wget http://waspsystem.einstein.yu.edu/wsfile/get/file/606a01ed-9c1e-4e51-a3dc-  
0ae2f06b9465/J446_BHLYGMBCXX_Lane2_GTGAAA_JD-0xBS.2_val_2.fq.gz
```

```
==> ./sanchari/j446/mergeBams.sh <==
```

```
#!/bin/bash  
#$ -cwd  
#$ -j n  
#$ -l h_vmem=4G  
#$ -pe smp 4  
#$ -S /bin/bash  
#$ -m e  
#$ -M kith.pradhan@einstein.yu.edu  
#usage:  
#qsub mergeBams.sh outfile.bam infile1.bam infile2.bam infile3.bam  
#qsub mergeBams.sh hpne_bs.bam *hpne*bs*sorted*bam  
module load samtools/1.2/gcc.4.4.7  
module load picard-tools/1.92/java.1.8.0_20  
  
#make a folder for storing intermediate result  
#otherwise, might run out of space on default /tmp  
mkdir -p tmp  
chmod 777 tmp  
  
#first argument is the name of the output file  
outbam=$1  
shift  
#the rest of the arguments are the bam files we want to merge
```

```
java -jar $(which MergeSamFiles.jar) \  
  `echo $@ | sed 's/\(\S\+\)/I=&/g'` \  
  ASSUME_SORTED=true \  
  TMP_DIR=tmp \  
  O=$outbam
```

```
==> ./sanchari/j446/reportMeth.sh <==
```

```
#!/bin/bash  
#$ -cwd  
#$ -j n  
#$ -l h_vmem=4G  
#$ -pe smp 1  
#$ -S /bin/bash  
#$ -m e  
#$ -M kith.pradhan@einstein.yu.edu  
module load samtools/1.2/gcc.4.4.7  
module load python/2.7.8/gcc.4.4.7
```

```
REF=/home/kpradha1/projects/hg19/hg19.fa  
bam=$1  
bname="${bam%. *}"
```

```
samtools mpileup -d1000000 -Q0 -B -f $REF $bam | \  
  ../mpileup2methylation.py -i - >| ${bname}.bedGraph
```

```
==> ./sanchari/j446/mpileup2methylation.py <==
```

```
#!/usr/bin/env python
```

```
import sys  
import argparse
```

```
parser = argparse.ArgumentParser(description= """)  
DESCRIPTION
```

```
  Extract methylation calls from samtools mpileup. Only positions with non-zero  
  count  
  are printed. Output has is bedGraph with additional columns:  
  <chrom> <pos-1> <pos> <pct meth'd> <cnt methylated> <tot count> <strand>
```

```
  Memo: bedGraph is 0-based, so if the first base of chr1 is C it will have  
  position: `chrom 0 1 ... +`
```

#### EXAMPLE & RECIPES

```
  samtools mpileup -d100000 -Q0 -B -l mm9.allcpg.bed.gz -f mmu.fa myreads.bam |  
  mpileup2methylation.py -i -
```

If you want to get only the Cs in a certain context (e.g. CpG) you need to pass a bed file to mpileup where these positions are. For example, to get all the CpGs you could use:

```
  fastaRegexFinder.py -f mmu.fa -r CG --noreverse > mm9.allcpg.bed  
  (Possibly pipe to `cut -f1-3 | gzip` to make the file smaller)
```

#### TESTED:

14/02/2013: The output of mpileup2methylation.py is almost (but not) identical to bismark\_methylation\_extractor (files \*.genome-wide\_CX|CpG\_report.txt). Tested

on synthetic strands single end, and paired-end whole genome. Differences not investigated further but should affect ~1 call in 1000-10000.

```
""" , formatter_class= argparse.RawTextHelpFormatter)

parser.add_argument('--input', '-i',
                    required= True,
                    help= '''Input file as produced by samtools mpileup. Use - to
read from stdin.
''' )

parser.add_argument('--outfmt', '-f',
                    required= False,
                    choices= ['bedgraph', 'bismark'],
                    default= 'bedgraph',
                    help= '''Output format: bedgraph (default) or bismark.
'bismark' output has columns: chrom, pos, strand, count meth'd, count unmeth'd.
The first 5 column of the genome-wide cytosine report produced by
bismark_methylation_extractor should be nearly identical to 'bismark' format.
''' )
```

```
args= parser.parse_args()
```

# -----

```
def cleanCallString(bases):
    """Removes from the call string in mpileup (5th column) the ^ character and
    the char next to it. Note TODO: Account for insertions/deletions.
    bases:
        String of read bases (5th column of mpileup)
    Return:
        Same string as bases but with ^ and the following char removed
    Example:
        bases= '^A.....^k.'
        cleanCallString(bases) >>> '.....'
    """
    callString= ''
    skip= False
    for x in bases:
        if x == '^':
            skip= True
        elif skip:
            skip= False
        else:
            callString += x
    return(callString)
```

```
def pileup2methylation(chrom, pos, callString, ref, outfmt):
    """Count methylated and unmethylated calls.
    chrom, pos:
        Chromosome (string) and position (int) on the pileup
    callString:
        String of bases obtained by cleanCallString
    ref:
        Reference base as obtained from 3rd column of mpileup
```

Memo: mpileup input looks like this:

|      |         |   |   |      |    |
|------|---------|---|---|------|----|
| chr7 | 3002089 | C | 2 | .^~. | IA |
| chr7 | 3002090 | G | 2 | ..   | HE |

```

chr7    3002114 C      2      ..      HE

"""
#  ref= mpileup[2]
#  callstring= mpileup[4]
cnt_M= 0 ## Count methylated
cnt_m= 0 ## Count unmethylated

if ref.upper() == 'G':
    strand= '-'
    cnt_M += callString.count(',')
    cnt_m += callString.count('a')
elif ref.upper() == 'C':
    strand= '+'
    cnt_M += callString.count('.')
    cnt_m += callString.count('T')
else:
    return(None)
if (cnt_m + cnt_M) == 0:
    return(None)
## Use for first version of methylation2mpileup.py
## methList= [mpileup[0], mpileup[1], strand, str(cnt_M), str(cnt_m), ref]
if outfmt == 'bismark':
    methList= [chrom, str(pos), strand, str(cnt_M), str(cnt_m)]
elif outfmt == 'bedgraph':
    totreads= cnt_M + cnt_m
    methList= [chrom, str(pos-1), str(pos),
str(round(100*(float(cnt_M)/totreads), 4)), str(cnt_M), str(totreads), strand]
else:
    sys.exit('Unexpected keyword for outfmt "%s"' %(outfmt))
return(methList)
# -----

if args.input == '-':
    fin= sys.stdin
else:
    fin= open(args.input)

for line in fin:
    line= line.strip().split('\t')
    callString= cleanCallString(line[4])
    methList= pileup2methylation(chrom= line[0], pos= int(line[1]), callString=
callString, ref= line[2], outfmt= args.outfmt)
    if methList is None:
        pass
    else:
        try:
            print('\t'.join(methList))
        except IOError as e:
            break
fin.close()
sys.exit()

```

```

==> ./sanchari/j446/split1.sh <==
split <(zcat J446_AHLT3HBCXX_Lane1_ACAGTG_HPNE-1-BS.1_val_1.fq.gz) -d -a 3 -l
40000000 split/J446_AHLT3HBCXX_Lane1_ACAGTG_HPNE-1-BS.1_val_1.fq.pt

```

```

split <(zcat J446_AHLT3HBCXX_Lane1_ACAGTG_HPNE-1-BS.2_val_2.fq.gz) -d -a 3 -l
40000000 split/J446_AHLT3HBCXX_Lane1_ACAGTG_HPNE-1-BS.2_val_2.fq.pt
split <(zcat J446_AHLT3HBCXX_Lane2_GCCAAT_HPNE-1-0xBS.1_val_1.fq.gz) -d -a 3 -l
40000000 split/J446_AHLT3HBCXX_Lane2_GCCAAT_HPNE-1-0xBS.1_val_1.fq.pt
split <(zcat J446_AHLT3HBCXX_Lane2_GCCAAT_HPNE-1-0xBS.2_val_2.fq.gz) -d -a 3 -l
40000000 split/J446_AHLT3HBCXX_Lane2_GCCAAT_HPNE-1-0xBS.2_val_2.fq.pt
split <(zcat J446_BHLYGMBCXX_Lane1_CTTGTA_JD-BS.1_val_1.fq.gz) -d -a 3 -l 40000000
split/J446_BHLYGMBCXX_Lane1_CTTGTA_JD-BS.1_val_1.fq.pt
split <(zcat J446_BHLYGMBCXX_Lane1_CTTGTA_JD-BS.2_val_2.fq.gz) -d -a 3 -l 40000000
split/J446_BHLYGMBCXX_Lane1_CTTGTA_JD-BS.2_val_2.fq.pt
split <(zcat J446_BHLYGMBCXX_Lane2_GTGAAA_JD-0xBS.1_val_1.fq.gz) -d -a 3 -l
40000000 split/J446_BHLYGMBCXX_Lane2_GTGAAA_JD-0xBS.1_val_1.fq.pt
split <(zcat J446_BHLYGMBCXX_Lane2_GTGAAA_JD-0xBS.2_val_2.fq.gz) -d -a 3 -l
40000000 split/J446_BHLYGMBCXX_Lane2_GTGAAA_JD-0xBS.2_val_2.fq.pt

```

```

==> ./sanchari/examine_mc_hmc/examineRegions.r <==
install.packages("Gviz")
library("Gviz")
install.packages("playwith")
library("playwith")
options(stringsAsFactors=F)

```

```

region=data.frame(name = "brd4", chr="19", start=15346301, end=15393262)
region$start = region$start - 2000
region$end = region$end + 2000

```

```

writeGeneInfo <- function(name, chr, start, end, W = 2000){
  region=data.frame(name = name, chr=chr, start=start, end=end)
  region$start = region$start - W
  region$end = region$end + W

  #where the conversion counts are stored
  ccfol =
"/home/kpradhan/Desktop/hpc_home/projects/sanchari/j432_j446/conversionCounts/"

  #load in the jd and hpne info for the region
  #takes about 3 minutes to load in chr19
  t1 = proc.time()
  jd.oxbs = read.table(paste0(ccfol, "JD_0xBS_", region$chr, ".txt.gz"))
  jd.bs = read.table(paste0(ccfol, "JD_BS_", region$chr, ".txt.gz"))
  hpne.oxbs = read.table(paste0(ccfol, "HPNE_0xBS_", region$chr, ".txt.gz"))
  hpne.bs = read.table(paste0(ccfol, "HPNE_BS_", region$chr, ".txt.gz"))
  t2 = proc.time()
  print(t2 - t1)

  #get the rows that lie within the genes region
  jd.oxbs.reg = jd.oxbs[head(which(jd.oxbs[,2] >
region$start),1):head(which(jd.oxbs[,2] > region$end),1),]
  jd.bs.reg = jd.bs[head(which(jd.bs[,2] >
region$start),1):head(which(jd.bs[,2] > region$end),1),]
  hpne.oxbs.reg = hpne.oxbs[head(which(hpne.oxbs[,2] >
region$start),1):head(which(hpne.oxbs[,2] > region$end),1),]
  hpne.bs.reg = hpne.bs[head(which(hpne.bs[,2] >
region$start),1):head(which(hpne.bs[,2] > region$end),1),]

```

```
#
```

```

#merge together bs and oxbs
jd.reg = merge(jd.bs.reg, jd.oxbs.reg, by=2)
hpne.reg = merge(hpne.bs.reg, hpne.oxbs.reg, by=2)

#playwith({
#   plot(jd.reg[,1], jd.reg[,3]/jd.reg[,4], type="l")
#})

write.table(paste0(region$name, "_jd_bs.bdg"), x=(cbind(jd.reg[,2], jd.reg[,
1], jd.reg[,1]+1, jd.reg[,3]/jd.reg[,4])), sep="\t", col.names=F, row.names=F,
quote=F)
write.table(paste0(region$name, "_jd_oxbs.bdg"), x=(cbind(jd.reg[,2],
jd.reg[, 1], jd.reg[,1]+1, jd.reg[,6]/jd.reg[,7])), sep="\t", col.names=F,
row.names=F, quote=F)

write.table(paste0(region$name, "_hpne_bs.bdg"), x=(cbind(hpne.reg[,2],
hpne.reg[, 1], hpne.reg[,1]+1, hpne.reg[,3]/hpne.reg[,4])), sep="\t", col.names=F,
row.names=F, quote=F)
write.table(paste0(region$name, "_hpne_oxbs.bdg"), x=(cbind(hpne.reg[,2],
hpne.reg[, 1], hpne.reg[,1]+1, hpne.reg[,6]/hpne.reg[,7])), sep="\t", col.names=F,
row.names=F, quote=F)
}

```

```

#brd4: chr19:15,346,301-15,393,262
#myc: chr8:128,746,315-128,755,680
#vegfa: chr6:43,735,946-43,756,223
#vegfb: chr11:64,000,056-64,008,736
#vegfc: chr4:177,602,689-177,715,899

```

```

writeGeneInfo("brd4", "19", 15346301, 15393262)
writeGeneInfo("myc", "8", 128746315, 128755680)
writeGeneInfo("vegfa", "6", 43735946, 43756223)
writeGeneInfo("vegfb", "11", 64000056, 64008736)
writeGeneInfo("vegfc", "4", 177602689, 177715899)

```

```

==> ./sanchari/examine_mc_hmc/commands1.sh <==
#prepare the oxbs files for a specific region.

```

```

#cut out the specific regions belonging to the gene.

```

```

#plus promoters
#chr19:15235519-15332545

```

```

#or just read each chromosome in, and use R to get the region chunk

```

```

#lets try lookin at just the cpg sites
cat hpne_bs.bdg | python ../filterCpg/filterCpg.py > hpne_bs_cpg.bdg
cat hpne_oxbs.bdg | python ../filterCpg/filterCpg.py > hpne_oxbs_cpg.bdg
cat jd_bs.bdg | python ../filterCpg/filterCpg.py > jd_bs_cpg.bdg
cat jd_oxbs.bdg | python ../filterCpg/filterCpg.py > jd_oxbs_cpg.bdg

```

```

#filter all but the cpg sites and save into new files

```

```
ls *.bdg | grep -v -e "-cpg." | sed 's/\(.*\)\.bdg/cat & \| python  
\.\.\./filterCpg/filterCpg.py >| \1_cpg.bdg/'
```

```
#merge all the cpg files by sample type  
cat *_hpne_oxbs_cpg* >| convPerc_hpne_oxbs_cpg.bdg  
cat *_hpne_bs_cpg* >| convPerc_hpne_bs_cpg.bdg  
cat *_jd_oxbs_cpg* >| convPerc_jd_oxbs_cpg.bdg  
cat *_jd_bs_cpg* >| convPerc_jd_bs_cpg.bdg
```

```
==> ./sanchari/peaks_rna/annotatePeaks.r <==  
library("ChIPpeakAnno")  
#source("https://bioconductor.org/biocLite.R")  
#biocLite("EnsDb.Hsapiens.v75")  
library(EnsDb.Hsapiens.v75)
```

```
options(stringsAsFactors=F)
```

```
#load in all the gene info from hg19  
knownGenes <- genes(EnsDb.Hsapiens.v75)
```

```
#peaksFile must be the peak summit file from macs2  
peaksFile = "hpne_stat3_summits.bed"  
addStrandToPeaks <- function(peaksFile, newFile){  
  #read in summits and convert to ranges  
  peaks = read.table(peaksFile)  
  #if the 3rd column is not the peak ends  
  if (is.na(as.numeric(peaks[,3]))){  
    #use the peaks starts + 1  
    ends = peaks[,2] + 1  
  }else{  
    ends = peaks[,3]  
  }  
  rd <- RangedData(IRanges(start = peaks[,2],  
    end = ends), space = peaks[,1])  
  ranges.peaks = toGRanges(rd, format="RangedData")  
  
  #annotate ranges with the knownGenes database  
  anno <- annotatePeakInBatch(ranges.peaks, AnnotationData=knownGenes)  
  
  #make sure to only take 1 result  
  x = anno[!(duplicated(anno$peak))]  
  #append the strand info to last column  
  y = cbind(peaks, strand=as.character(x$feature_strand))  
  y$strand = as.character(x$feature_strand)  
  y$strand[is.na(y$strand)] = ""  
  #write the new stranded peak file  
  write.table(newFile, x=y, col.names=F, row.names=F, quote=F, sep="\t")  
}
```



```

#stat3
addStrandToPeaks("test1_jdmc_top100k.txt", "test1_jdmc_top100k_stranded.txt")
addStrandToPeaks("test1_jdhmc.txt", "test1_jdhmc_stranded.txt")

addStrandToPeaks("hpne_stat3_summits.bed", "hpne_stat3_summits_stranded.txt")
addStrandToPeaks("jd13d_stat3_summits.bed", "jd_stat3_summits_stranded.txt")

peaksFile = "peaks.atac.jd.gain.1k.txt"
addStrandToPeaks("peaks.atac.jd.gain.1k.txt", "peaks.atac.jd.gain.1k_stranded.txt")
addStrandToPeaks("peaks.atac.jd.loss.1k.txt", "peaks.atac.jd.loss.1k_stranded.txt")

addStrandToPeaks("/home/kpradhan/Desktop/hpc_home/projects/sanchari/j455_j515/macs_
Chpne_sorted_mdup_Tjd_sorted_mdup_merged/Chpne_sorted_mdup_Tjd_sorted_mdup_merged_s
ummits.bed", "jd-hpne_strandedPeakSummits.txt")
addStrandToPeaks("/home/kpradhan/Desktop/hpc_home/projects/sanchari/j455_j515/macs_
Cjd_sorted_mdup_merged_Thpne_sorted_mdup/Cjd_sorted_mdup_merged_Thpne_sorted_mdup_s
ummits.bed", "hpne-jd_strandedPeakSummits.txt")

addStrandToPeaks("p3.txt", "p3_stranded.txt")

addStrandToPeaks("hmc_sig0.001_commonSites1_hpne.bed",
"hpneHmc_strandedPeakSummits_0.001.txt")
addStrandToPeaks("hmc_sig0.001_commonSites1_jd.bed",
"jdHmc_strandedPeakSummits_0.001.txt")

addStrandToPeaks("hmc_sig0.01_commonSites1_hpne.bed",
"hpneHmc_strandedPeakSummits.txt")
addStrandToPeaks("hmc_sig0.01_commonSites1_jd.bed",
"jdHmc_strandedPeakSummits.txt")

addStrandToPeaks("/home/kpradhan/Desktop/hpc_home/projects/sanchari/j455/macs_hpne_
sorted_mdup/hpne_sorted_mdup_summits.bed", "hpne_strandedPeakSummits.txt")
addStrandToPeaks("/home/kpradhan/Desktop/hpc_home/projects/sanchari/j455_j515/macs_
jd_sorted_mdup_merged/jd_sorted_mdup_merged_summits.bed",
"jd_strandedPeakSummits.txt")

addStrandToPeaks("/home/kpradhan/mnt/hpc_home/projects/colocalization/jd_hmc.txt",
"jd_strandedHmc.txt")
addStrandToPeaks("/home/kpradhan/mnt/hpc_home/projects/colocalization/hpne_hmc.txt"
, "hpne_strandedHmc.txt")

#####33
#scratch

```

```

rd <- RangedData(IRanges(start = peaks.hpne[,2],
                        end = peaks.hpne[,3]), space = peaks.hpne[,1])
ranges.hpne = toGRanges(rd, format="RangedData")

anno.hpne <- annotatePeakInBatch(ranges.hpne, AnnotationData=knownGenes)

x = anno.hpne[!(duplicated(anno.hpne$peak))]
#write the peaks with strand info
x$feature_strand
slot(strand(x), "values")
str(ranges(x))
y = cbind(peaks.hpne, strand=as.character(x$feature_strand))
y$strand = as.character(y$strand)
class(y$strand)
sum(is.na(y$strand))
y$strand[is.na(y$strand)] = "*"

write.table("peaks_test1.bed", x=y, col.names=F, row.names=F, quote=F, sep="\t")

head(y)

start(ranges(x))
end(ranges(x))
head(x)
str(x)
names(x)
x$ranges
x["ranges"]
ranges(x)
dim(peaks.hpne)

hmc_sig0.01_commonSites1_hpne.bed

hmc.hpne = read.table("hmc_sig0.01_commonSites1_hpne.bed")

peaks.hpne =
read.table("/home/kpradhan/Desktop/hpc_home/projects/sanchari/j455/macs_hpne_sorted
_mdup/hpne_sorted_mdup_summits.bed")
peaks.hpne =
read.table("/home/kpradhan/Desktop/hpc_home/projects/sanchari/j455/macs_hpne_sorted
_mdup/hpne_sorted_mdup_peaks.xls", header=T)
head(peaks.hpne)

peaks.jd =
read.table("/home/kpradhan/Desktop/hpc_home/projects/sanchari/j455_j515/macs_jd_sor
ted_mdup_merged/jd_sorted_mdup_merged_summits.bed")

peaks.jdMinushpne =
read.table("/home/kpradhan/Desktop/hpc_home/projects/sanchari/j455_j515/macs_Chpne_
sorted_mdup_Tjd_sorted_mdup_merged/Chpne_sorted_mdup_Tjd_sorted_mdup_merged_summits
.bed")
peaks.hpneMinusjd =
read.table("/home/kpradhan/Desktop/hpc_home/projects/sanchari/j455_j515/macs_Cjd_so
rted_mdup_merged_Thpne_sorted_mdup/Cjd_sorted_mdup_merged_Thpne_sorted_mdup_summits
.bed")

```

```
==> ./sanchari/peaks_rna/commands2_stat3Rna.sh <==
```

```
#RNA bams
```

```
bam1=/home/kpradhan/Desktop/data/sanchari/pancreatic/rnaseq/bam/JRN.AD0C99ABXX.lane_8_P0_I2.hg19.gsnap-rna-alignment.bam
```

```
bam2=/home/kpradhan/Desktop/data/sanchari/pancreatic/rnaseq/bam/HPNE.AC1FL7ACXX.lane_1_P0_I5.hg19.gsnap-rna-alignment.bam
```

```
#atacseq peaks with strand information
```

```
peak1=peaks.atac.jd.gain.1k_stranded.txt
```

```
peak2=peaks.atac.jd.loss.1k_stranded.txt
```

```
time ngs.plot.r -SS same -G hg19 -R bed -E $peak1 -C $bam1 -O peaks.atac.jd.gain.1k -T peaks.atac.jd.gain.1k -P 2 -L 3000
```

```
time ngs.plot.r -SS same -G hg19 -R bed -E $peak2 -C $bam2 -O peaks.atac.jd.loss.1k -T peaks.atac.jd.loss.1k -P 2 -L 3000
```

```
python makeColocPlots.py jdLoss1kAtacPeaks_hpneRna
```

```
python makeColocPlots.py jdGain1kAtacPeaks_jdRna
```

```
==> ./sanchari/peaks_rna/commands1.sh <==
```

```
#get a list of differential peaks between jd and hpne.
```

```
#the peaks in one but not the other.
```

```
#see if stat3 appears in either of the differential peaks
```

```
#want to find transcription factor bindings at these diff peaks
```

```
#MOTIF analysis?
```

```
#rna coverage plot at these diff peak summits
```

```
#prepare peak strand info for the hmc sites
```

```
#RNA bams
```

```
bam1=/home/kpradhan/Desktop/data/sanchari/pancreatic/rnaseq/bam/HPNE.AC1FL7ACXX.lane_1_P0_I5.hg19.gsnap-rna-alignment.bam
```

```
bam2=/home/kpradhan/Desktop/data/sanchari/pancreatic/rnaseq/bam/JRN.AD0C99ABXX.lane_8_P0_I2.hg19.gsnap-rna-alignment.bam
```

```
#atacseq peaks
```

```
peak1=/home/kpradhan/Desktop/hpc_home/projects/sanchari/j455/macs_hpne_sorted_mdup/hpne_sorted_mdup_summits.bed
```

```
peak2=/home/kpradhan/Desktop/hpc_home/projects/sanchari/j455_j515/macs_jd_sorted_mdup_merged/jd_sorted_mdup_merged_summits.bed
```

```
#atacseq peaks with strand information
```

```
peak1=hpne_strandedPeakSummits.txt
```

```
peak2=jd_strandedPeakSummits.txt
```

```

#hmc peaks with strand
peak1=hpneHmc_strandedPeakSummits_0.001.txt
peak2=jdHmc_strandedPeakSummits_0.001.txt

cat $peak1 | awk -v OFS='\t' '{print $1,$2,$3,"1234","5678",$4}' >| p1.txt
cat $peak2 | awk -v OFS='\t' '{print $1,$2,$3,"1234","5678",$4}' >| p2.txt
hpneHmc_strandedPeakSummits.txt

cat commonSites1_hpne.sorted.bed | awk -v OFS='\t' '{print $1,$2,$3,"1234","5678",
$4}' >| p3.txt

peak1=hpneHmc_strandedPeakSummits_0.001.txt
peak2=jdHmc_strandedPeakSummits_0.001.txt

peak1=commonSites1_hpne.sorted.bed
peak2=commonSites1_jd.sorted.bed

time ngs.plot.r -SS same -G hg19 -R bed -E p1.txt -C $bam1 -O test1 -T test1 -P 2
-L 3000
time ngs.plot.r -SS same -G hg19 -R bed -E p2.txt -C $bam2 -O test2 -T test2 -P 2
-L 3000

time ngs.plot.r -S 0.1 -SS same -G hg19 -R bed -E p3_stranded.txt -C $bam1 -O test3
-T test3 -P 2 -L 3000

time ngs.plot.r -SS same -G hg19 -R bed -E $peak1 -C $bam1 -O
hpne_strandedHmcPeaks_fisher0.001_strandedRna -T
hpne_strandedHmcPeaks_fisher0.001_strandedRna -P 2 -L 3000
time ngs.plot.r -SS same -G hg19 -R bed -E $peak2 -C $bam2 -O
jd_strandedHmcPeaks_fisher0.001_strandedRna -T
jd_strandedHmcPeaks_fisher0.001_strandedRna -P 2 -L 3000

time ngs.plot.r -S 0.1 -SS same -G hg19 -R bed -E $peak1 -C $bam1 -O
hpne_strandedHmcPeaks_0.01_strandedRna -T hpne_strandedHmcPeaks_0.1_strandedRna -P
2 -L 3000
time ngs.plot.r -S 0.1 -SS same -G hg19 -R bed -E $peak2 -C $bam2 -O
jd_strandedHmcPeaks_0.01_strandedRna -T jd_strandedHmcPeaks_0.1_strandedRna -P 2 -L
3000

#hmc use same stranded reads for the stranded peaks
time ngs.plot.r -SS same -G hg19 -R bed -E $peak1 -C $bam1 -O
hpneHmc_strandedAtacPeaks_strandedRna -T hpneHmc_strandedAtacPeaks_strandedRna -P 2
-L 3000
time ngs.plot.r -SS same -G hg19 -R bed -E $peak2 -C $bam2 -O
jdHmc_strandedAtacPeaks_strandedRna -T jdHmc_strandedAtacPeaks_strandedRna -P 2 -L
3000

#use same stranded reads for the stranded peaks
time ngs.plot.r -SS same -G hg19 -R bed -E $peak1 -C $bam1 -O
hpne_strandedAtacPeaks_strandedRna -T hpne_strandedAtacPeaks_strandedRna -P 2 -L
3000
time ngs.plot.r -SS same -G hg19 -R bed -E $peak2 -C $bam2 -O
jd_strandedAtacPeaks_strandedRna -T jd_strandedAtacPeaks_strandedRna -P 2 -L 3000

```

```
#time ngs.plot.r -G hg19 -R bed -E $peak1 -C $bam1 -O atac_rna_hpne_all -T
atac_rna_hpne_all -P 2 -L 3000
#time ngs.plot.r -G hg19 -R bed -E $peak2 -C $bam2 -O atac_rna_jd_all -T
atac_rna_jd_all -P 2 -L 3000

time ngs.plot.r -G hg19 -R bed -E peaks_test1.bed -C $bam1 -O testatac_rna_hpne_all
-T testatac_rna_hpne_all -P 2 -L 3000
time ngs.plot.r -SS same -G hg19 -R bed -E peaks_test1.bed -C $bam1 -O
test2atac_rna_hpne_all -T test2atac_rna_hpne_all -P 2 -L 3000
```

```
#####
#new stuff
#
```

```
#try it with hmc peaks?
time ngs.plot.r -G hg19 -R bed -E jdHmc_strandedPeakSummits.txt -C $bam2 -O
jdHmc0.01_jdRna -T jdHmc0.01_jdRna -P 2 -L 3000
time ngs.plot.r -G hg19 -R bed -E hpneHmc_strandedPeakSummits.txt -C $bam1 -O
hpneHmc0.01_hpneRna -T hpneHmc0.01_hpneRna -P 2 -L 3000
sort -k1,1 -k2,2n jdHmc_strandedPeakSummits.txt | ../filterCpg/filterCpg.py | cut
-f1-4 >| jdHmc_cpg_strandedPeakSummits.txt
sort -k1,1 -k2,2n hpneHmc_strandedPeakSummits.txt | ../filterCpg/filterCpg.py | cut
-f1-4 >| hpneHmc_cpg_strandedPeakSummits.txt
time ngs.plot.r -SS same -G hg19 -R bed -E jdHmc_cpg_strandedPeakSummits.txt -C
$bam2 -O jdHmc0.01cpg_jdRna -T jdHmc0.01cpg_jdRna -P 2 -L 3000
time ngs.plot.r -SS same -G hg19 -R bed -E hpneHmc_cpg_strandedPeakSummits.txt -C
$bam1 -O hpneHmc0.01cpg_hpneRna -T hpneHmc0.01cpg_hpneRna -P 2 -L 3000
```

```
#TODO:
#instead of the 0.01 hmc sites...try will all of the hmc sites
#but use a random shuf of them.
```

```
#try atacseq diff peaks and RNA
time ngs.plot.r -G hg19 -R bed -E jd-hpne_strandedPeakSummits.txt -C $bam2 -O jd-
hpneAtac_jdRna -T jd-hpneAtac_jdRna -P 2 -L 3000
time ngs.plot.r -G hg19 -R bed -E hpne-jd_strandedPeakSummits.txt -C $bam1 -O hpne-
jdAtac_jdRna -T hpne-jdAtac_jdRna -P 2 -L 3000
```

```
#TODO
#try it with mc peaks?
```

```
#scratch
```

```
hpneHmc_strandedPeakSummits.txt
cat jdHmc_strandedPeakSummits.txt | awk -v OFS='\t' '{print $1,$2,$3,"1234","5678",
$4}' >| p1.txt
cat $peak2 | awk -v OFS='\t' '{print $1,$2,$3,"1234","5678",$4}' >| p2.txt
```

```
==> ./sanchari/peaks_rna/commands2_atacRna.sh <==
```

```
#RNA bams
```

```
bam1=/home/kpradhan/Desktop/data/sanchari/pancreatic/rnaseq/bam/JRN.AD0C99ABXX.lane_8_P0_I2.hg19.gsnap-rna-alignment.bam
bam2=/home/kpradhan/Desktop/data/sanchari/pancreatic/rnaseq/bam/HPNE.AC1FL7ACXX.lane_1_P0_I5.hg19.gsnap-rna-alignment.bam
```

```
#atacseq peaks with strand information
peak1=peaks.atac.jd.gain.1k_stranded.txt
peak2=peaks.atac.jd.loss.1k_stranded.txt
```

```
time ngs.plot.r -SS same -G hg19 -R bed -E $peak1 -C $bam1 -O peaks.atac.jd.gain.1k
-T peaks.atac.jd.gain.1k -P 2 -L 3000
time ngs.plot.r -SS same -G hg19 -R bed -E $peak2 -C $bam2 -O peaks.atac.jd.loss.1k
-T peaks.atac.jd.loss.1k -P 2 -L 3000
```

```
python makeColocPlots.py jdLoss1kAtacPeaks_hpneRna
python makeColocPlots.py jdGain1kAtacPeaks_jdRna
```

```
#test out the new atac peaks
bam1=/home/kpradhan/Desktop/data/sanchari/pancreatic/rnaseq/bam/JRN.AD0C99ABXX.lane_8_P0_I2.hg19.gsnap-rna-alignment.bam
cut -f1,2,4 test1_jdmc_top100k_stranded.txt | awk '{printf("%s\t%d\t%d\t%s\n", $1, $2, $2+1, $3)}' > test2_jdmc_top100k_stranded.txt
cut -f1,2,4 test1_jdhmc_stranded.txt | awk '{printf("%s\t%d\t%d\t%s\n", $1, $2, $2+1, $3)}' > test2_jdhmc_stranded.txt
```

```
#cat test1_jdmc.txt | awk '{printf("%s\t%d\t%d\t%s\n", $1, $2, $2+1, $3)}' > test2_jdmc.txt
time ngs.plot.r -SS same -G hg19 -R bed -E test2_jdmc_top100k_stranded.txt -C $bam1 -O test_jdmc_top100k -T test_jdmc_top100k -P 6 -L 3000
time ngs.plot.r -SS same -G hg19 -R bed -E test2_jdhmc_stranded.txt -C $bam1 -O test_jdhmc -T test_jdhmc -P 6 -L 3000
```

```
==> ./sanchari/j432/test1/makeMergeCommands.sh <==
SNAME=$1
FQ1=$2
FQ2=$3
REF=/home/kpradha1/projects/hg19/
```

```
cat <<PROGRAM_END
#!/bin/bash
#$ -cwd
#$ -j n
#$ -l h_vmem=40G
#$ -pe smp 17
#$ -S /bin/bash
#$ -m e
#$ -M kith.pradhan@einstein.yu.edu
```

```
module load bismark/0.14.5
module load bowtie2/2.2.3/gcc.4.4.7
module load samtools/1.2/gcc.4.4.7
module load picard-tools/1.92/java.1.8.0_20
```

```

==> ./sanchari/j432/test1/markDuplicates.sh <==
#!/bin/bash
#$ -cwd
#$ -j n
#$ -l h_vmem=4G
#$ -pe smp 4
#$ -S /bin/bash
#$ -m e
#$ -M kith.pradhan@einstein.yu.edu
module load samtools/1.2/gcc.4.4.7
module load picard-tools/1.92/java.1.8.0_20

bam=$1
bname="${bam%. *}"

java -jar $(which BuildBamIndex.jar) INPUT=${bam}
java -jar $(which MarkDuplicates.jar) INPUT=${bam} OUTPUT=${bname}_mdup.bam
METRICS_FILE=${bname}_mdMetric.txt
java -jar $(which BuildBamIndex.jar) INPUT=${bname}_mdup.bam

```

```

==> ./sanchari/j432/test1/batch1.sh <==
#!/bin/bash
#$ -cwd
#$ -j n
#$ -l h_vmem=40G
#$ -pe smp 1
#$ -S /bin/bash
#$ -m e
#$ -M kith.pradhan@einstein.yu.edu
module load bismark/0.14.5
module load bowtie2/2.2.3/gcc.4.4.7
module load samtools/1.2/gcc.4.4.7
module load picard-tools/1.92/java.1.8.0_20

```

```

FNAME=test
SNAME=foo
FQ1=${FNAME}_1.fastq.gz
FQ2=${FNAME}_2.fastq.gz
REF=/home/kpradha1/projects/hg19/
#can't use basename with multicore
#bismark --multicore 2 --bowtie2 -p 4 $REF -1 $FQ1 -2 $FQ2 --basename $SNAME
bismark --multicore 4 --bowtie2 -p 4 $REF -1 $FQ1 -2 $FQ2
#java -jar $(which SortSam.jar) INPUT=${FQ1##*/}_bismark_bt2_pe.bam OUTPUT=${SNAME}_sorted.bam SO=coordinate
java -jar $(which SortSam.jar) INPUT=${FQ1}_bismark_bt2_pe.bam OUTPUT=${SNAME}_sorted.bam SO=coordinate
java -jar $(which BuildBamIndex.jar) INPUT=${SNAME}_sorted.bam
java -jar $(which MarkDuplicates.jar) INPUT=${SNAME}_sorted.bam OUTPUT=${SNAME}_sorted_md.bam METRICS_FILE=${SNAME}_mdMetric.txt
java -jar $(which BuildBamIndex.jar) INPUT=${SNAME}_sorted_md.bam

```

```

==> ./sanchari/j432/test1/mergeBams_old.sh <==
#!/bin/bash
#$ -cwd
#$ -j n

```

```

#$ -l h_vmem=4G
#$ -pe smp 4
#$ -S /bin/bash
#$ -m e
#$ -M kith.pradhan@einstein.yu.edu
module load samtools/1.2/gcc.4.4.7
module load picard-tools/1.92/java.1.8.0_20

mkdir -p tmp
chmod 777 tmp
java -jar $(which MergeSamFiles.jar) \
  `ls *HPNE-1_BS*pe.bam | sed 's/./I=&/' | tr '\n' ' '\`
  ASSUME_SORTED=false\
  TMP_DIR=tmp\
  O=test.bam

==> ./sanchari/j432/test1/mergeBams.sh <==
#!/bin/bash
#$ -cwd
#$ -j n
#$ -l h_vmem=4G
#$ -pe smp 4
#$ -S /bin/bash
#$ -m e
#$ -M kith.pradhan@einstein.yu.edu
#usage:
#qsub mergeBams.sh outfile.bam infile1.bam infile2.bam infile3.bam
#qsub mergeBams.sh hpne_bs.bam *hpne*bs*sorted*bam
module load samtools/1.2/gcc.4.4.7
module load picard-tools/1.92/java.1.8.0_20

#make a folder for storing intermediate result
#otherwise, might run out of space on default /tmp
mkdir -p tmp
chmod 777 tmp

#first argument is the name of the output file
outbam=$1
shift
#the rest of the arguments are the bam files we want to merge

java -jar $(which MergeSamFiles.jar) \
  `echo $@ | sed 's/\(\\S+\)/I=&/g'\`
  ASSUME_SORTED=true\
  TMP_DIR=tmp\
  O=$outbam

==> ./sanchari/j432/test1/makeBismarkBatch.sh <==
SNAME=$1
FQ1=$2
FQ2=$3
REF=/home/kpradha1/projects/hg19/

cat <<PROGRAM_END
#!/bin/bash
#$ -cwd
#$ -j n

```



```

#$ -l h_vmem=40G
#$ -pe smp 17
#$ -S /bin/bash
#$ -m e
#$ -M kith.pradhan@einstein.yu.edu

module load bismark/0.14.5
module load bowtie2/2.2.3/gcc.4.4.7
module load samtools/1.2/gcc.4.4.7
module load picard-tools/1.92/java.1.8.0_20

SNAME=$1
FQ1=$2
FQ2=$3
REF=/home/kpradha1/projects/hg19/
bismark --multicore 4 --bowtie2 -p 4 $REF -1 $FQ1 -2 $FQ2
java -jar \$(which SortSam.jar) INPUT=${FQ1}_bismark_bt2_pe.bam OUTPUT=${SNAME}_sorted.bam SO=coordinate CREATE_INDEX=true

PROGRAM_END

==> ./sanchari/j432/test1/testSetup1.sh <==
#change this to ls *.1_val_1*
for fq1 in `ls ../trimmed/split/J432_AHHH5NBCXX_Lane1_ACAGTG_HPNE-1_BS.1_val_1*`;
do
    fq2=`echo $fq1 | sed 's/\(.*\)1_val_1\(.*\)\/\12_val_2\2/'`
    pname=`echo $fq1 | sed 's/.*\/\(.*\).1_val_1.fq.\(p.*\)\/\1\2/'`
    #echo $fq1
    #echo $fq2
    #echo $pname
    echo "./makeBismarkBatch.sh $pname $fq1 $fq2 | qsub"
done

==> ./sanchari/j432/test1/do_bismark1.sh <==
#!/bin/bash
#$ -cwd
#$ -j n
#$ -l h_vmem=15G
#$ -S /bin/bash
#$ -m e
#$ -M kith.pradhan@einstein.yu.edu
#
# do_bismark.sh
# Brent Calder <brent.calder@einstein.yu.edu>
#
# Convenience script to take fastq.gz input, run trim_galore,
# fastqc, split input, run Bismark, then merge, sort, and index
# output into BAM.
#

set -o errexit -o nounset -o allelexport -o pipefail

# user options

GENOME_FOLDER=/home/kpradha1/projects/hg19/
GENOME=mm9.fa # not used, this is the original
# genome name at ../fasta, relative to GENOME_FOLDER

```

```

TRIM_GALORE_OPTS="" # mainly for new adapter sequence or clips
FASTQC_OPTS="" # optional FASTQC options
BISMARK_OPTS="" # see documentation, 'non-directional' set below (DIRECTIONS)
BOWTIE2_OPTS="" # bowtie2 options for bismark

# number of reads per split work file
READS_PER_FASTQ=4000000
# DIRECTIONS must be 2 or 4 (eg. 4 = "--non_directional")
DIRECTIONS=4
# NTHREADS is the number of threads per DIRECTION
NTHREADS=2
# DIRECTIONS*THREADS = num_proc

#####
# DO NOT EDIT BELOW HERE

USAGE="\t\tqsub do_bismark.sh forward_read.fastq.gz
[reverse_read.fastq.gz]\n"
ADMON="reads must be in format: name.fastq.gz\n"
PAIRED=0
REVERSE_READ=""
MYID=$((RANDOM))

if [ "$DIRECTIONS" -eq "4" ]; then
    BISMARK_OPTS="${BISMARK_OPTS} --non_directional"
else
    # default back to directional
    DIRECTIONS=2
fi

if [ "$#" -eq "2" ]; then
    PAIRED=1
    REVERSE_READ=$2
    REVERSE=`basename ${REVERSE_READ}/.fastq.gz/`
    TRIM_GALORE_OPTS="${TRIM_GALORE_OPTS} --paired"
    if [ "${#REVERSE_READ}" -eq "${#REVERSE}" ]; then
        USAGE="${USAGE}${ADMON}"
        echo -e "$USAGE" >&2
        exit 2
    fi
else
    if [ "$#" -ne "1" ]; then
        echo -e "$USAGE" >&2
        exit 1
    fi
fi

FORWARD_READ=$1
FORWARD=`basename ${FORWARD_READ}/.fastq.gz/`

if [ "${#FORWARD_READ}" -eq "${#FORWARD}" ]; then
    USAGE="${USAGE}${ADMON}"
    echo -e "$USAGE" >&2
    exit 2
fi

#####
# REQUIRED MODULES

```

```

#####
#source /apps1/modules/init/bash

module load bowtie2/2.2.3/gcc.4.4.7
module load trim_galore/0.3.7/gcc.4.4.7
module load bismark/0.14.5
module load FastQC/0.11.4/java.1.8.0_20
module load picard-tools/1.92/java.1.8.0_20
# might be necessary to set up qsub
if [ -e /etc/profile.d/sge-binaries.sh ]; then
    source /etc/profile.d/sge-binaries.sh
fi

# output dirs
mkdir -p fastqc split bismark trimmed tmp

# trim illumina adapters and -q 20 by default
trim_galore --dont_gzip -o trimmed --fastqc --fastqc_args "${FASTQC_OPTS} -o
./fastqc" $TRIM_GALORE_OPTS $FORWARD_READ $REVERSE_READ

# split files based on READS_PER_FASTQ
if [ "$PAIRED" -eq "0" ]; then
    split -a 3 -l $(( ${READS_PER_FASTQ} * 4 )) trimmed/${FORWARD}_trimmed.fq split/${
FORWARD}.split.
else
    if [ "$PAIRED" -eq "1" ]; then
        split -a 3 -l $(( ${READS_PER_FASTQ} * 4 )) trimmed/${FORWARD}_val_1.fq split/${
FORWARD}.split.
        split -a 3 -l $(( ${READS_PER_FASTQ} * 4 )) trimmed/${REVERSE}_val_2.fq split/${
REVERSE}.split.
    fi
fi

# run bismark on the split files
for x in `ls -1 split/${FORWARD}.split.*`; do
    READSTR=${x}
    suf=${x/*split./}
    if [ "$PAIRED" -eq "1" ]; then
        second=split/${REVERSE}.split.${suf}
        READSTR="-1 ${x} -2 ${second}"
    fi
    qsub -cwd -l h_vmem=30G -V -N bismark-${MYID} -j y -b y bismark --temp_dir tmp
-o bismark --bowtie2 -p $(( ${NTHREADS} * ${DIRECTIONS} )) $BISMARK_OPTS $BOWTIE2_OPTS
$GENOME_FOLDER $READSTR
done

# use picard to merge, sort, create bam and index split SAM upon completion.
SAMS=""
if [ "$PAIRED" -eq "0" ]; then
    SAMS=`ls -1 split/${FORWARD}.split.* | sed 's|^split|I=bismark|g' | sed 's/
$/_bismark_bt2.sam/g' | tr "\n" " "`
else
    SAMS=`ls -1 split/${FORWARD}.split.* | sed 's|^split|I=bismark|g' | sed 's/
$/_bismark_bt2_pe.sam/g' | tr "\n" " "`
fi
BAM=${FORWARD}.bam

qsub -S /bin/bash -hold_jid bismark-${MYID} -cwd -V -l h_vmem=4G -j y -N merge -b y
java -jar $(which MergeSamFiles.jar) $SAMS O=$BAM AS=false SO=coordinate

```

```

TMP_DIR=./tmp CREATE_INDEX=true

==> ./sanchari/j432/test3/do_bismark.sh <==
#!/bin/bash
#$ -S /bin/bash
#$ -cwd
#$ -j y
#$ -l p=2
#$ -l mf=30G
#
# do_bismark.sh
# Brent Calder <brent.calder@einstein.yu.edu>
#
# Convenience script to take fastq.gz input, run trim_galore,
# fastqc, split input, run Bismark, then merge, sort, and index
# output into BAM.
#

set -o errexit -o nounset -o allexport -o pipefail

# user options

GENOME_FOLDER=/rio1/indexes/hg19/bowtie2/
GENOME=mm9.fa # not used, this is the original
# genome name at ../fasta, relative to GENOME_FOLDER

TRIM_GALORE_OPTS="" # mainly for new adapter sequence or clips
FASTQC_OPTS="" # optional FASTQC options
BISMARK_OPTS="" # see documentation, 'non-directional' set below (DIRECTIONS)
BOWTIE2_OPTS="" # bowtie2 options for bismark

# number of reads per split work file
READS_PER_FASTQ=4000000
# DIRECTIONS must be 2 or 4 (eg. 4 = "--non_directional")
DIRECTIONS=4
# NTHREADS is the number of threads per DIRECTION
NTHREADS=2
# DIRECTIONS*THREADS = num_proc

#####
# DO NOT EDIT BELOW HERE

USAGE="Usage:\t\tqsub do_bismark.sh forward_read.fastq.gz
[reverse_read.fastq.gz]\n"
ADMON="reads must be in format: name.fastq.gz\n"
PAIRED=0
REVERSE_READ=""
MYID=$$-${RANDOM}

if [ "$DIRECTIONS" -eq "4" ]; then
    BISMARK_OPTS="${BISMARK_OPTS} --non_directional"
else
    # default back to directional
    DIRECTIONS=2
fi

if [ "$#" -eq "2" ]; then

```

```

    PAIRED=1
    REVERSE_READ=$2
    REVERSE=`basename ${REVERSE_READ}/.fastq.gz/`
    TRIM_GALORE_OPTS="${TRIM_GALORE_OPTS} --paired"
    if [ "${#REVERSE_READ}" -eq "${#REVERSE}" ]; then
        USAGE="${USAGE}${ADMON}"
        echo -e "$USAGE" >&2
        exit 2
    fi
else
    if [ "$#" -ne "1" ]; then
        echo -e "$USAGE" >&2
        exit 1
    fi
fi

FORWARD_READ=$1
FORWARD=`basename ${FORWARD_READ}/.fastq.gz/`

if [ "${#FORWARD_READ}" -eq "${#FORWARD}" ]; then
    USAGE="${USAGE}${ADMON}"
    echo -e "$USAGE" >&2
    exit 2
fi

#####
# REQUIRED MODULES
#####
source /apps1/modules/init/bash

module load trim_galore/0.3.3
module load bismark/0.10.1
module load fastqc/0.10.1
module load picard/1.104

# might be necessary to set up qsub
if [ -e /etc/profile.d/sge-binaries.sh ]; then
    source /etc/profile.d/sge-binaries.sh
fi

# output dirs
mkdir -p fastqc split bismark trimmed tmp

# trim illumina adapters and -q 20 by default
trim_galore --dont_gzip -o trimmed --fastqc --fastqc_args "${FASTQC_OPTS} -o
./fastqc" $TRIM_GALORE_OPTS $FORWARD_READ $REVERSE_READ

# split files based on READS_PER_FASTQ
if [ "$PAIRED" -eq "0" ]; then
    split -a 3 -l $(( ${READS_PER_FASTQ} * 4 )) trimmed/${FORWARD}_trimmed.fq split/${
FORWARD}.split.
else
    if [ "$PAIRED" -eq "1" ]; then
        split -a 3 -l $(( ${READS_PER_FASTQ} * 4 )) trimmed/${FORWARD}_val_1.fq split/${
FORWARD}.split.
        split -a 3 -l $(( ${READS_PER_FASTQ} * 4 )) trimmed/${REVERSE}_val_2.fq split/${
REVERSE}.split.
    fi
fi

```

```

# run bismark on the split files
for x in `ls -1 split/${FORWARD}.split.*`; do
    READSTR=${x}
    suf=${x/*split./}
    if [ "$SPAIRED" -eq "1" ]; then
        second=split/${REVERSE}.split.${suf}
        READSTR="-1 ${x} -2 ${second}"
    fi
    qsub -cwd -l p=$(( ${NTHREADS} * ${DIRECTIONS} )) -l mf=30g -V -N bismark-${MYID}
    -j y -b y bismark --temp_dir tmp -o bismark --bowtie2 -p=$(( ${NTHREADS} * ${DIRECTIONS} )) $BISMARK_OPTS $BOWTIE2_OPTS $GENOME_FOLDER $READSTR
done

```

```

# use picard to merge, sort, create bam and index split SAM upon completion.
SAMS=""
if [ "$SPAIRED" -eq "0" ]; then
    SAMS=`ls -1 split/${FORWARD}.split.* | sed 's|^split|I=bismark|g' | sed 's/
$/_bismark_bt2.sam/g' | tr "\n" " "`
else
    SAMS=`ls -1 split/${FORWARD}.split.* | sed 's|^split|I=bismark|g' | sed 's/
$/_bismark_bt2_pe.sam/g' | tr "\n" " "`
fi
BAM=${FORWARD}.bam

```

```

qsub -S /bin/bash -hold_jid bismark-${MYID} -cwd -V -l mf=4g -j y -N merge -b y
java -jar $PICARD_ROOT/MergeSamFiles.jar $SAMS O=$BAM AS=false SO=coordinate
TMP_DIR=./tmp CREATE_INDEX=true

```

```

==> ./sanchari/j432/test3/batch3.sh <==

```

```

#!/bin/bash
#$ -cwd
#$ -j n
#$ -l h_vmem=15G
#$ -S /bin/bash
#$ -m e
#$ -M kith.pradhan@einstein.yu.edu
module load bismark/0.14.5
module load bowtie2/2.2.3/gcc.4.4.7
module load samtools/1.2/gcc.4.4.7
module load picard-tools/1.92/java.1.8.0_20

```

```

FNAME=J432_AHHH5NBCXX_Lane1_ACAGTG_HPNE-1_BS
SNAME=hpne_bs
FQ1=${FNAME}.1_val_1.fq.gz
FQ2=${FNAME}.2_val_2.fq.gz
REF=/home/kpradha1/projects/hg19/
bismark --bowtie2 $REF -1 $FQ1 -2 $FQ2 --basename $SNAME
java -jar $(which SortSam.jar) INPUT=${SNAME}_pe.bam OUTPUT=${SNAME}_sorted.bam
SO=coordinate
java -jar $(which BuildBamIndex.jar) INPUT=${SNAME}_sorted.bam
java -jar $(which MarkDuplicates.jar) INPUT=${SNAME}_sorted.bam OUTPUT=${SNAME}_sorted_md.bam METRICS_FILE=${SNAME}_mdMetric.txt
java -jar $(which BuildBamIndex.jar) INPUT=${SNAME}_sorted_md.bam

```

```

==> ./sanchari/j432/test3/do_bismark1.sh <==

```

```

#!/bin/bash
#$ -cwd
#$ -j n
#$ -l h_vmem=15G
#$ -S /bin/bash
#$ -m e
#$ -M kith.pradhan@einstein.yu.edu
#
# do_bismark.sh
# Brent Calder <brent.calder@einstein.yu.edu>
#
# Convenience script to take fastq.gz input, run trim_galore,
# fastqc, split input, run Bismark, then merge, sort, and index
# output into BAM.
#

set -o errexit -o nounset -o allexport -o pipefail

# user options

GENOME_FOLDER=/home/kpradha1/projects/hg19/
GENOME=mm9.fa # not used, this is the original
# genome name at ../fasta, relative to GENOME_FOLDER

TRIM_GALORE_OPTS="" # mainly for new adapter sequence or clips
FASTQC_OPTS="" # optional FASTQC options
BISMARK_OPTS="" # see documentation, 'non-directional' set below (DIRECTIONS)
BOWTIE2_OPTS="" # bowtie2 options for bismark

# number of reads per split work file
READS_PER_FASTQ=4000000
# DIRECTIONS must be 2 or 4 (eg. 4 = "--non_directional")
DIRECTIONS=4
# NTHREADS is the number of threads per DIRECTION
NTHREADS=2
# DIRECTIONS*THREADS = num_proc

#####
# DO NOT EDIT BELOW HERE

USAGE="Usage:\t\tqsub do_bismark.sh forward_read.fastq.gz
[reverse_read.fastq.gz]\n"
ADMON="reads must be in format: name.fastq.gz\n"
PAIRED=0
REVERSE_READ=""
MYID=$$-${RANDOM}

if [ "$DIRECTIONS" -eq "4" ]; then
    BISMARK_OPTS="${BISMARK_OPTS} --non_directional"
else
    # default back to directional
    DIRECTIONS=2
fi

if [ "$#" -eq "2" ]; then
    PAIRED=1
    REVERSE_READ=$2
    REVERSE=`basename ${REVERSE_READ}/.fastq.gz/`

```

```

    TRIM_GALORE_OPTS="${TRIM_GALORE_OPTS} --paired"
    if [ "${#REVERSE_READ}" -eq "${#REVERSE}" ]; then
        USAGE="${USAGE}${ADMON}"
        echo -e "$USAGE" >&2
        exit 2
    fi
else
    if [ "$#" -ne "1" ]; then
        echo -e "$USAGE" >&2
        exit 1
    fi
fi

FORWARD_READ=$1
FORWARD=`basename ${FORWARD_READ}/.fastq.gz/`

if [ "${#FORWARD_READ}" -eq "${#FORWARD}" ]; then
    USAGE="${USAGE}${ADMON}"
    echo -e "$USAGE" >&2
    exit 2
fi

#####
# REQUIRED MODULES
#####
#source /apps1/modules/init/bash

module load trim_galore/0.3.7/gcc.4.4.7
module load bismark/0.14.5
module load FastQC/0.11.4/java.1.8.0_20
module load picard-tools/1.92/java.1.8.0_20

# might be necessary to set up qsub
if [ -e /etc/profile.d/sge-binaries.sh ]; then
    source /etc/profile.d/sge-binaries.sh
fi

# output dirs
mkdir -p fastqc split bismark trimmed tmp

# trim illumina adapters and -q 20 by default
trim_galore --dont_gzip -o trimmed --fastqc --fastqc_args "${FASTQC_OPTS} -o
./fastqc" $TRIM_GALORE_OPTS $FORWARD_READ $REVERSE_READ

# split files based on READS_PER_FASTQ
if [ "$PAIRED" -eq "0" ]; then
    split -a 3 -l $(( ${READS_PER_FASTQ} * 4 )) trimmed/${FORWARD}_trimmed.fq split/${
FORWARD}.split.
else
    if [ "$PAIRED" -eq "1" ]; then
        split -a 3 -l $(( ${READS_PER_FASTQ} * 4 )) trimmed/${FORWARD}_val_1.fq split/${
FORWARD}.split.
        split -a 3 -l $(( ${READS_PER_FASTQ} * 4 )) trimmed/${REVERSE}_val_2.fq split/${
REVERSE}.split.
    fi
fi

# run bismark on the split files
for x in `ls -1 split/${FORWARD}.split.*`; do

```



```

    READSTR=${X}
    suf=${X/*split./}
    if [ "$PAIRED" -eq "1" ]; then
        second=split/${REVERSE}.split.${suf}
        READSTR="-1 ${X} -2 ${second}"
    fi
    qsub -cwd -l p=$(( ${NTHREADS} * ${DIRECTIONS} )) -l mf=30g -V -N bismark-${MYID}
    -j y -b y bismark --temp_dir tmp -o bismark --bowtie2 -p=$(( ${NTHREADS} * ${DIRECTIONS} )) $BISMARK_OPTS $BOWTIE2_OPTS $GENOME_FOLDER $READSTR
done

```

```

# use picard to merge, sort, create bam and index split SAM upon completion.
SAMS=""

```

```

if [ "$PAIRED" -eq "0" ]; then
    SAMS=`ls -1 split/${FORWARD}.split.* | sed 's|^split|I=bismark|g' | sed 's/
$/_bismark_bt2.sam/g' | tr "\n" " "`
else
    SAMS=`ls -1 split/${FORWARD}.split.* | sed 's|^split|I=bismark|g' | sed 's/
$/_bismark_bt2_pe.sam/g' | tr "\n" " "`
fi
BAM=${FORWARD}.bam

```

```

qsub -S /bin/bash -hold_jid bismark-${MYID} -cwd -V -l mf=4g -j y -N merge -b y
java -jar $PICARD_ROOT/MergeSamFiles.jar $SAMS O=$BAM AS=false SO=coordinate
TMP_DIR=./tmp CREATE_INDEX=true

```

```

==> ./sanchari/j432/bismark_aligned/clipOverlaps.sh <==

```

```

#!/bin/bash
#$ -cwd
#$ -j n
#$ -l h_vmem=4G
#$ -pe smp 1
#$ -S /bin/bash
#$ -m e
#$ -M kith.pradhan@einstein.yu.edu
module load samtools/1.2/gcc.4.4.7
module load bamUtil/1.0.13/gcc.4.4.7

```

```

bam=$1
bname="${bam%. *}"

```

```

bam clipOverlap --in $bam --out ${bname}_clip.bam
samtools index ${bname}_clip.bam

```

```

==> ./sanchari/j432/bismark_aligned/sortBam.sh <==

```

```

#!/bin/bash
#$ -cwd
#$ -j n
#$ -l h_vmem=4G
#$ -pe smp 1
#$ -S /bin/bash
#$ -m e
#$ -M kith.pradhan@einstein.yu.edu
module load samtools/1.2/gcc.4.4.7

```

```

bam=$1

```

```
bname="${bam%. *}"
```

```
samtools sort $bam ${bname}_sorted  
samtools index ${bname}_sorted.bam
```

```
==> ./sanchari/j432/bismark_aligned/markDuplicates.sh <==
```

```
#!/bin/bash  
#$ -cwd  
#$ -j n  
#$ -l h_vmem=4G  
#$ -pe smp 4  
#$ -S /bin/bash  
#$ -m e  
#$ -M kith.pradhan@einstein.yu.edu  
module load samtools/1.2/gcc.4.4.7  
module load picard-tools/1.92/java.1.8.0_20
```

```
bam=$1  
bname="${bam%. *}"
```

```
java -jar $(which BuildBamIndex.jar) INPUT=${bam}  
java -jar $(which MarkDuplicates.jar) INPUT=${bam} OUTPUT=${bname}_mdup.bam  
METRICS_FILE=${bname}_mdMetric.txt  
java -jar $(which BuildBamIndex.jar) INPUT=${bname}_mdup.bam
```

```
==> ./sanchari/j432/bismark_aligned/nameSort.sh <==
```

```
#!/bin/bash  
#$ -cwd  
#$ -j n  
#$ -l h_vmem=4G  
#$ -pe smp 4  
#$ -S /bin/bash  
#$ -m e  
#$ -M kith.pradhan@einstein.yu.edu  
module load samtools/1.2/gcc.4.4.7
```

```
bam=$1  
bname="${bam%. *}"
```

```
samtools sort -n $bam ${bname}_nsorted  
samtools index ${bname}_nsorted.bam
```

```
==> ./sanchari/j432/bismark_aligned/qscripts/J432_BHKVCGBCXX_Lane2_GTGAAA_JD-  
0xBS_p011.sh <==
```

```
#!/bin/bash  
#$ -cwd  
#$ -N bismark_alignment  
#$ -j n  
#$ -l h_vmem=5.8G  
#$ -pe smp 5  
#$ -S /bin/bash  
#$ -m e  
#$ -M kith.pradhan@einstein.yu.edu
```

```
module load bismark/0.14.5
module load bowtie2/2.2.3/gcc.4.4.7
module load samtools/1.2/gcc.4.4.7
module load picard-tools/1.92/java.1.8.0_20
```

```
SNAME=J432_BHKVCGBCXX_Lane2_GTGAAA_JD-OxBS_p011
FQ1=./trimmed/split/J432_BHKVCGBCXX_Lane2_GTGAAA_JD-OxBS.1_val_1.fq.p011
FQ2=./trimmed/split/J432_BHKVCGBCXX_Lane2_GTGAAA_JD-OxBS.2_val_2.fq.p011
REF=/home/kpradha1/projects/hg19/
bismark --multicore 1 --bowtie2 -p 4 /home/kpradha1/projects/hg19/ -1
./trimmed/split/J432_BHKVCGBCXX_Lane2_GTGAAA_JD-OxBS.1_val_1.fq.p011 -2
./trimmed/split/J432_BHKVCGBCXX_Lane2_GTGAAA_JD-OxBS.2_val_2.fq.p011
java -jar $(which SortSam.jar) INPUT=J432_BHKVCGBCXX_Lane2_GTGAAA_JD-
OxBS.1_val_1.fq.p011_bismark_bt2_pe.bam OUTPUT=J432_BHKVCGBCXX_Lane2_GTGAAA_JD-
OxBS_p011_sorted.bam SO=coordinate CREATE_INDEX=true
echo "done" > J432_BHKVCGBCXX_Lane2_GTGAAA_JD-OxBS_p011.status
```

```
==> ./sanchari/j432/bismark_aligned/qscripts/J432_BHKVCGBCXX_Lane2_GTGAAA_JD-
OxBS_p014.sh <==
#!/bin/bash
#$ -cwd
#$ -N bismark_alignment
#$ -j n
#$ -l h_vmem=5.8G
#$ -pe smp 5
#$ -S /bin/bash
#$ -m e
#$ -M kith.pradhan@einstein.yu.edu
```

```
module load bismark/0.14.5
module load bowtie2/2.2.3/gcc.4.4.7
module load samtools/1.2/gcc.4.4.7
module load picard-tools/1.92/java.1.8.0_20
```

```
SNAME=J432_BHKVCGBCXX_Lane2_GTGAAA_JD-OxBS_p014
FQ1=./trimmed/split/J432_BHKVCGBCXX_Lane2_GTGAAA_JD-OxBS.1_val_1.fq.p014
FQ2=./trimmed/split/J432_BHKVCGBCXX_Lane2_GTGAAA_JD-OxBS.2_val_2.fq.p014
REF=/home/kpradha1/projects/hg19/
bismark --multicore 1 --bowtie2 -p 4 /home/kpradha1/projects/hg19/ -1
./trimmed/split/J432_BHKVCGBCXX_Lane2_GTGAAA_JD-OxBS.1_val_1.fq.p014 -2
./trimmed/split/J432_BHKVCGBCXX_Lane2_GTGAAA_JD-OxBS.2_val_2.fq.p014
java -jar $(which SortSam.jar) INPUT=J432_BHKVCGBCXX_Lane2_GTGAAA_JD-
OxBS.1_val_1.fq.p014_bismark_bt2_pe.bam OUTPUT=J432_BHKVCGBCXX_Lane2_GTGAAA_JD-
OxBS_p014_sorted.bam SO=coordinate CREATE_INDEX=true
echo "done" > J432_BHKVCGBCXX_Lane2_GTGAAA_JD-OxBS_p014.status
```

```
==> ./sanchari/j432/bismark_aligned/qscripts/J432_BHKVCGBCXX_Lane1_CTTGTA_JD-
BS_p000.sh <==
#!/bin/bash
#$ -cwd
#$ -N bismark_alignment
#$ -j n
#$ -l h_vmem=5.8G
#$ -pe smp 5
#$ -S /bin/bash
#$ -m e
#$ -M kith.pradhan@einstein.yu.edu
```

```
module load bismark/0.14.5
module load bowtie2/2.2.3/gcc.4.4.7
module load samtools/1.2/gcc.4.4.7
module load picard-tools/1.92/java.1.8.0_20
```

```
SNAME=J432_BHKVCGBCXX_Lane1_CTTGTA_JD-BS_p000
FQ1=./trimmed/split/J432_BHKVCGBCXX_Lane1_CTTGTA_JD-BS.1_val_1.fq.p000
FQ2=./trimmed/split/J432_BHKVCGBCXX_Lane1_CTTGTA_JD-BS.2_val_2.fq.p000
REF=/home/kpradha1/projects/hg19/
bismark --multicore 1 --bowtie2 -p 4 /home/kpradha1/projects/hg19/ -1
./trimmed/split/J432_BHKVCGBCXX_Lane1_CTTGTA_JD-BS.1_val_1.fq.p000 -2
./trimmed/split/J432_BHKVCGBCXX_Lane1_CTTGTA_JD-BS.2_val_2.fq.p000
java -jar $(which SortSam.jar) INPUT=J432_BHKVCGBCXX_Lane1_CTTGTA_JD-
BS.1_val_1.fq.p000_bismark_bt2_pe.bam OUTPUT=J432_BHKVCGBCXX_Lane1_CTTGTA_JD-
BS_p000_sorted.bam SO=coordinate CREATE_INDEX=true
echo "done" > J432_BHKVCGBCXX_Lane1_CTTGTA_JD-BS_p000.status
```

```
==> ./sanchari/j432/bismark_aligned/qscripts/J432_AHHH5NBCXX_Lane1_ACAGTG_HPNE-
1_BS_p000.sh <==
#!/bin/bash
#$ -cwd
#$ -N bismark_alignment
#$ -j n
#$ -l h_vmem=5.8G
#$ -pe smp 5
#$ -S /bin/bash
#$ -m e
#$ -M kith.pradhan@einstein.yu.edu
```

```
module load bismark/0.14.5
module load bowtie2/2.2.3/gcc.4.4.7
module load samtools/1.2/gcc.4.4.7
module load picard-tools/1.92/java.1.8.0_20
```

```
SNAME=J432_AHHH5NBCXX_Lane1_ACAGTG_HPNE-1_BS_p000
FQ1=./trimmed/split/J432_AHHH5NBCXX_Lane1_ACAGTG_HPNE-1_BS.1_val_1.fq.p000
FQ2=./trimmed/split/J432_AHHH5NBCXX_Lane1_ACAGTG_HPNE-1_BS.2_val_2.fq.p000
REF=/home/kpradha1/projects/hg19/
bismark --multicore 1 --bowtie2 -p 4 /home/kpradha1/projects/hg19/ -1
./trimmed/split/J432_AHHH5NBCXX_Lane1_ACAGTG_HPNE-1_BS.1_val_1.fq.p000 -2
./trimmed/split/J432_AHHH5NBCXX_Lane1_ACAGTG_HPNE-1_BS.2_val_2.fq.p000
java -jar $(which SortSam.jar) INPUT=J432_AHHH5NBCXX_Lane1_ACAGTG_HPNE-
1_BS.1_val_1.fq.p000_bismark_bt2_pe.bam OUTPUT=J432_AHHH5NBCXX_Lane1_ACAGTG_HPNE-
1_BS_p000_sorted.bam SO=coordinate CREATE_INDEX=true
echo "done" > J432_AHHH5NBCXX_Lane1_ACAGTG_HPNE-1_BS_p000.status
```

```
==> ./sanchari/j432/bismark_aligned/qscripts/J432_AHHH5NBCXX_Lane2_GCCAAT_HPNE-
10xBS_p008.sh <==
#!/bin/bash
#$ -cwd
#$ -N bismark_alignment
#$ -j n
#$ -l h_vmem=5.8G
#$ -pe smp 5
#$ -S /bin/bash
#$ -m e
#$ -M kith.pradhan@einstein.yu.edu
```

```
module load bismark/0.14.5
```

```
module load bowtie2/2.2.3/gcc.4.4.7
module load samtools/1.2/gcc.4.4.7
module load picard-tools/1.92/java.1.8.0_20
```

```
SNAME=J432_AHHH5NBCXX_Lane2_GCCAAT_HPNE-10xBS_p008
FQ1=./trimmed/split/J432_AHHH5NBCXX_Lane2_GCCAAT_HPNE-10xBS.1_val_1.fq.p008
FQ2=./trimmed/split/J432_AHHH5NBCXX_Lane2_GCCAAT_HPNE-10xBS.2_val_2.fq.p008
REF=/home/kpradha1/projects/hg19/
bismark --multicore 1 --bowtie2 -p 4 /home/kpradha1/projects/hg19/ -1
./trimmed/split/J432_AHHH5NBCXX_Lane2_GCCAAT_HPNE-10xBS.1_val_1.fq.p008 -2
./trimmed/split/J432_AHHH5NBCXX_Lane2_GCCAAT_HPNE-10xBS.2_val_2.fq.p008
java -jar $(which SortSam.jar) INPUT=J432_AHHH5NBCXX_Lane2_GCCAAT_HPNE-
10xBS.1_val_1.fq.p008_bismark_bt2_pe.bam OUTPUT=J432_AHHH5NBCXX_Lane2_GCCAAT_HPNE-
10xBS_p008_sorted.bam SO=coordinate CREATE_INDEX=true
echo "done" > J432_AHHH5NBCXX_Lane2_GCCAAT_HPNE-10xBS_p008.status
```

```
==> ./sanchari/j432/bismark_aligned/qscripts/J432_BHKVCGBCXX_Lane1_CTTGTA_JD-
BS_p001.sh <==
```

```
#!/bin/bash
#$ -cwd
#$ -N bismark_alignment
#$ -j n
#$ -l h_vmem=5.8G
#$ -pe smp 5
#$ -S /bin/bash
#$ -m e
#$ -M kith.pradhan@einstein.yu.edu
```

```
module load bismark/0.14.5
module load bowtie2/2.2.3/gcc.4.4.7
module load samtools/1.2/gcc.4.4.7
module load picard-tools/1.92/java.1.8.0_20
```

```
SNAME=J432_BHKVCGBCXX_Lane1_CTTGTA_JD-BS_p001
FQ1=./trimmed/split/J432_BHKVCGBCXX_Lane1_CTTGTA_JD-BS.1_val_1.fq.p001
FQ2=./trimmed/split/J432_BHKVCGBCXX_Lane1_CTTGTA_JD-BS.2_val_2.fq.p001
REF=/home/kpradha1/projects/hg19/
bismark --multicore 1 --bowtie2 -p 4 /home/kpradha1/projects/hg19/ -1
./trimmed/split/J432_BHKVCGBCXX_Lane1_CTTGTA_JD-BS.1_val_1.fq.p001 -2
./trimmed/split/J432_BHKVCGBCXX_Lane1_CTTGTA_JD-BS.2_val_2.fq.p001
java -jar $(which SortSam.jar) INPUT=J432_BHKVCGBCXX_Lane1_CTTGTA_JD-
BS.1_val_1.fq.p001_bismark_bt2_pe.bam OUTPUT=J432_BHKVCGBCXX_Lane1_CTTGTA_JD-
BS_p001_sorted.bam SO=coordinate CREATE_INDEX=true
echo "done" > J432_BHKVCGBCXX_Lane1_CTTGTA_JD-BS_p001.status
```

```
==> ./sanchari/j432/bismark_aligned/qscripts/J432_BHKVCGBCXX_Lane2_GTGAAA_JD-
0xBS_p006.sh <==
```

```
#!/bin/bash
#$ -cwd
#$ -N bismark_alignment
#$ -j n
#$ -l h_vmem=5.8G
#$ -pe smp 5
#$ -S /bin/bash
#$ -m e
#$ -M kith.pradhan@einstein.yu.edu
```

```
module load bismark/0.14.5
module load bowtie2/2.2.3/gcc.4.4.7
```

```
module load samtools/1.2/gcc.4.4.7
module load picard-tools/1.92/java.1.8.0_20
```

```
SNAME=J432_BHKVCGBCXX_Lane2_GTGAAA_JD-0xBS_p006
FQ1=./trimmed/split/J432_BHKVCGBCXX_Lane2_GTGAAA_JD-0xBS.1_val_1.fq.p006
FQ2=./trimmed/split/J432_BHKVCGBCXX_Lane2_GTGAAA_JD-0xBS.2_val_2.fq.p006
REF=/home/kpradha1/projects/hg19/
bismark --multicore 1 --bowtie2 -p 4 /home/kpradha1/projects/hg19/ -1
./trimmed/split/J432_BHKVCGBCXX_Lane2_GTGAAA_JD-0xBS.1_val_1.fq.p006 -2
./trimmed/split/J432_BHKVCGBCXX_Lane2_GTGAAA_JD-0xBS.2_val_2.fq.p006
java -jar $(which SortSam.jar) INPUT=J432_BHKVCGBCXX_Lane2_GTGAAA_JD-
0xBS.1_val_1.fq.p006_bismark_bt2_pe.bam OUTPUT=J432_BHKVCGBCXX_Lane2_GTGAAA_JD-
0xBS_p006_sorted.bam SO=coordinate CREATE_INDEX=true
echo "done" > J432_BHKVCGBCXX_Lane2_GTGAAA_JD-0xBS_p006.status
```

```
==> ./sanchari/j432/bismark_aligned/qscripts/J432_AHHH5NBCXX_Lane2_GCCAAT_HPNE-
10xBS_p013.sh <==
#!/bin/bash
#$ -cwd
#$ -N bismark_alignment
#$ -j n
#$ -l h_vmem=5.8G
#$ -pe smp 5
#$ -S /bin/bash
#$ -m e
#$ -M kith.pradhan@einstein.yu.edu
```

```
module load bismark/0.14.5
module load bowtie2/2.2.3/gcc.4.4.7
module load samtools/1.2/gcc.4.4.7
module load picard-tools/1.92/java.1.8.0_20
```

```
SNAME=J432_AHHH5NBCXX_Lane2_GCCAAT_HPNE-10xBS_p013
FQ1=./trimmed/split/J432_AHHH5NBCXX_Lane2_GCCAAT_HPNE-10xBS.1_val_1.fq.p013
FQ2=./trimmed/split/J432_AHHH5NBCXX_Lane2_GCCAAT_HPNE-10xBS.2_val_2.fq.p013
REF=/home/kpradha1/projects/hg19/
bismark --multicore 1 --bowtie2 -p 4 /home/kpradha1/projects/hg19/ -1
./trimmed/split/J432_AHHH5NBCXX_Lane2_GCCAAT_HPNE-10xBS.1_val_1.fq.p013 -2
./trimmed/split/J432_AHHH5NBCXX_Lane2_GCCAAT_HPNE-10xBS.2_val_2.fq.p013
java -jar $(which SortSam.jar) INPUT=J432_AHHH5NBCXX_Lane2_GCCAAT_HPNE-
10xBS.1_val_1.fq.p013_bismark_bt2_pe.bam OUTPUT=J432_AHHH5NBCXX_Lane2_GCCAAT_HPNE-
10xBS_p013_sorted.bam SO=coordinate CREATE_INDEX=true
echo "done" > J432_AHHH5NBCXX_Lane2_GCCAAT_HPNE-10xBS_p013.status
```

```
==> ./sanchari/j432/bismark_aligned/qscripts/J432_AHHH5NBCXX_Lane2_GCCAAT_HPNE-
10xBS_p001.sh <==
#!/bin/bash
#$ -cwd
#$ -N bismark_alignment
#$ -j n
#$ -l h_vmem=5.8G
#$ -pe smp 5
#$ -S /bin/bash
#$ -m e
#$ -M kith.pradhan@einstein.yu.edu
```

```
module load bismark/0.14.5
module load bowtie2/2.2.3/gcc.4.4.7
module load samtools/1.2/gcc.4.4.7
```

```
module load picard-tools/1.92/java.1.8.0_20
```

```
SNAME=J432_AHHH5NBCXX_Lane2_GCCAAT_HPNE-10xBS_p001
FQ1=./trimmed/split/J432_AHHH5NBCXX_Lane2_GCCAAT_HPNE-10xBS.1_val_1.fq.p001
FQ2=./trimmed/split/J432_AHHH5NBCXX_Lane2_GCCAAT_HPNE-10xBS.2_val_2.fq.p001
REF=/home/kpradha1/projects/hg19/
bismark --multicore 1 --bowtie2 -p 4 /home/kpradha1/projects/hg19/ -1
./trimmed/split/J432_AHHH5NBCXX_Lane2_GCCAAT_HPNE-10xBS.1_val_1.fq.p001 -2
./trimmed/split/J432_AHHH5NBCXX_Lane2_GCCAAT_HPNE-10xBS.2_val_2.fq.p001
java -jar $(which SortSam.jar) INPUT=J432_AHHH5NBCXX_Lane2_GCCAAT_HPNE-
10xBS.1_val_1.fq.p001_bismark_bt2_pe.bam OUTPUT=J432_AHHH5NBCXX_Lane2_GCCAAT_HPNE-
10xBS_p001_sorted.bam SO=coordinate CREATE_INDEX=true
echo "done" > J432_AHHH5NBCXX_Lane2_GCCAAT_HPNE-10xBS_p001.status
```

```
==> ./sanchari/j432/bismark_aligned/qscripts/J432_AHHH5NBCXX_Lane1_ACAGTG_HPNE-
1_BS_p010.sh <==
```

```
#!/bin/bash
#$ -cwd
#$ -N bismark_alignment
#$ -j n
#$ -l h_vmem=5.8G
#$ -pe smp 5
#$ -S /bin/bash
#$ -m e
#$ -M kith.pradhan@einstein.yu.edu
```

```
module load bismark/0.14.5
module load bowtie2/2.2.3/gcc.4.4.7
module load samtools/1.2/gcc.4.4.7
module load picard-tools/1.92/java.1.8.0_20
```

```
SNAME=J432_AHHH5NBCXX_Lane1_ACAGTG_HPNE-1_BS_p010
FQ1=./trimmed/split/J432_AHHH5NBCXX_Lane1_ACAGTG_HPNE-1_BS.1_val_1.fq.p010
FQ2=./trimmed/split/J432_AHHH5NBCXX_Lane1_ACAGTG_HPNE-1_BS.2_val_2.fq.p010
REF=/home/kpradha1/projects/hg19/
bismark --multicore 1 --bowtie2 -p 4 /home/kpradha1/projects/hg19/ -1
./trimmed/split/J432_AHHH5NBCXX_Lane1_ACAGTG_HPNE-1_BS.1_val_1.fq.p010 -2
./trimmed/split/J432_AHHH5NBCXX_Lane1_ACAGTG_HPNE-1_BS.2_val_2.fq.p010
java -jar $(which SortSam.jar) INPUT=J432_AHHH5NBCXX_Lane1_ACAGTG_HPNE-
1_BS.1_val_1.fq.p010_bismark_bt2_pe.bam OUTPUT=J432_AHHH5NBCXX_Lane1_ACAGTG_HPNE-
1_BS_p010_sorted.bam SO=coordinate CREATE_INDEX=true
echo "done" > J432_AHHH5NBCXX_Lane1_ACAGTG_HPNE-1_BS_p010.status
```

```
==> ./sanchari/j432/bismark_aligned/qscripts/J432_AHHH5NBCXX_Lane1_ACAGTG_HPNE-
1_BS_p012.sh <==
```

```
#!/bin/bash
#$ -cwd
#$ -N bismark_alignment
#$ -j n
#$ -l h_vmem=5.8G
#$ -pe smp 5
#$ -S /bin/bash
#$ -m e
#$ -M kith.pradhan@einstein.yu.edu
```

```
module load bismark/0.14.5
module load bowtie2/2.2.3/gcc.4.4.7
module load samtools/1.2/gcc.4.4.7
module load picard-tools/1.92/java.1.8.0_20
```

```
SNAME=J432_AHHH5NBCXX_Lane1_ACAGTG_HPNE-1_BS_p012
FQ1=./trimmed/split/J432_AHHH5NBCXX_Lane1_ACAGTG_HPNE-1_BS.1_val_1.fq.p012
FQ2=./trimmed/split/J432_AHHH5NBCXX_Lane1_ACAGTG_HPNE-1_BS.2_val_2.fq.p012
REF=/home/kpradha1/projects/hg19/
bismark --multicore 1 --bowtie2 -p 4 /home/kpradha1/projects/hg19/ -1
../trimmed/split/J432_AHHH5NBCXX_Lane1_ACAGTG_HPNE-1_BS.1_val_1.fq.p012 -2
../trimmed/split/J432_AHHH5NBCXX_Lane1_ACAGTG_HPNE-1_BS.2_val_2.fq.p012
java -jar $(which SortSam.jar) INPUT=J432_AHHH5NBCXX_Lane1_ACAGTG_HPNE-
1_BS.1_val_1.fq.p012_bismark_bt2_pe.bam OUTPUT=J432_AHHH5NBCXX_Lane1_ACAGTG_HPNE-
1_BS_p012_sorted.bam SO=coordinate CREATE_INDEX=true
echo "done" > J432_AHHH5NBCXX_Lane1_ACAGTG_HPNE-1_BS_p012.status
```

```
==> ./sanchari/j432/bismark_aligned/qscripts/J432_BHKVCGBCXX_Lane1_CTTGTA_JD-
BS_p008.sh <==
```

```
#!/bin/bash
#$ -cwd
#$ -N bismark_alignment
#$ -j n
#$ -l h_vmem=5.8G
#$ -pe smp 5
#$ -S /bin/bash
#$ -m e
#$ -M kith.pradhan@einstein.yu.edu
```

```
module load bismark/0.14.5
module load bowtie2/2.2.3/gcc.4.4.7
module load samtools/1.2/gcc.4.4.7
module load picard-tools/1.92/java.1.8.0_20
```

```
SNAME=J432_BHKVCGBCXX_Lane1_CTTGTA_JD-BS_p008
FQ1=./trimmed/split/J432_BHKVCGBCXX_Lane1_CTTGTA_JD-BS.1_val_1.fq.p008
FQ2=./trimmed/split/J432_BHKVCGBCXX_Lane1_CTTGTA_JD-BS.2_val_2.fq.p008
REF=/home/kpradha1/projects/hg19/
bismark --multicore 1 --bowtie2 -p 4 /home/kpradha1/projects/hg19/ -1
../trimmed/split/J432_BHKVCGBCXX_Lane1_CTTGTA_JD-BS.1_val_1.fq.p008 -2
../trimmed/split/J432_BHKVCGBCXX_Lane1_CTTGTA_JD-BS.2_val_2.fq.p008
java -jar $(which SortSam.jar) INPUT=J432_BHKVCGBCXX_Lane1_CTTGTA_JD-
BS.1_val_1.fq.p008_bismark_bt2_pe.bam OUTPUT=J432_BHKVCGBCXX_Lane1_CTTGTA_JD-
BS_p008_sorted.bam SO=coordinate CREATE_INDEX=true
echo "done" > J432_BHKVCGBCXX_Lane1_CTTGTA_JD-BS_p008.status
```

```
==> ./sanchari/j432/bismark_aligned/qscripts/J432_AHHH5NBCXX_Lane1_ACAGTG_HPNE-
1_BS_p002.sh <==
```

```
#!/bin/bash
#$ -cwd
#$ -N bismark_alignment
#$ -j n
#$ -l h_vmem=5.8G
#$ -pe smp 5
#$ -S /bin/bash
#$ -m e
#$ -M kith.pradhan@einstein.yu.edu
```

```
module load bismark/0.14.5
module load bowtie2/2.2.3/gcc.4.4.7
module load samtools/1.2/gcc.4.4.7
module load picard-tools/1.92/java.1.8.0_20
```



```
SNAME=J432_AHHH5NBCXX_Lane1_ACAGTG_HPNE-1_BS_p002
FQ1=./trimmed/split/J432_AHHH5NBCXX_Lane1_ACAGTG_HPNE-1_BS.1_val_1.fq.p002
FQ2=./trimmed/split/J432_AHHH5NBCXX_Lane1_ACAGTG_HPNE-1_BS.2_val_2.fq.p002
REF=/home/kpradha1/projects/hg19/
bismark --multicore 1 --bowtie2 -p 4 /home/kpradha1/projects/hg19/ -1
./trimmed/split/J432_AHHH5NBCXX_Lane1_ACAGTG_HPNE-1_BS.1_val_1.fq.p002 -2
./trimmed/split/J432_AHHH5NBCXX_Lane1_ACAGTG_HPNE-1_BS.2_val_2.fq.p002
java -jar $(which SortSam.jar) INPUT=J432_AHHH5NBCXX_Lane1_ACAGTG_HPNE-
1_BS.1_val_1.fq.p002_bismark_bt2_pe.bam OUTPUT=J432_AHHH5NBCXX_Lane1_ACAGTG_HPNE-
1_BS_p002_sorted.bam SO=coordinate CREATE_INDEX=true
echo "done" > J432_AHHH5NBCXX_Lane1_ACAGTG_HPNE-1_BS_p002.status
```

```
==> ./sanchari/j432/bismark_aligned/qscripts/J432_BHKVCGBCXX_Lane1_CTTGTA_JD-
BS_p009.sh <==
```

```
#!/bin/bash
#$ -cwd
#$ -N bismark_alignment
#$ -j n
#$ -l h_vmem=5.8G
#$ -pe smp 5
#$ -S /bin/bash
#$ -m e
#$ -M kith.pradhan@einstein.yu.edu
```

```
module load bismark/0.14.5
module load bowtie2/2.2.3/gcc.4.4.7
module load samtools/1.2/gcc.4.4.7
module load picard-tools/1.92/java.1.8.0_20
```

```
SNAME=J432_BHKVCGBCXX_Lane1_CTTGTA_JD-BS_p009
FQ1=./trimmed/split/J432_BHKVCGBCXX_Lane1_CTTGTA_JD-BS.1_val_1.fq.p009
FQ2=./trimmed/split/J432_BHKVCGBCXX_Lane1_CTTGTA_JD-BS.2_val_2.fq.p009
REF=/home/kpradha1/projects/hg19/
bismark --multicore 1 --bowtie2 -p 4 /home/kpradha1/projects/hg19/ -1
./trimmed/split/J432_BHKVCGBCXX_Lane1_CTTGTA_JD-BS.1_val_1.fq.p009 -2
./trimmed/split/J432_BHKVCGBCXX_Lane1_CTTGTA_JD-BS.2_val_2.fq.p009
java -jar $(which SortSam.jar) INPUT=J432_BHKVCGBCXX_Lane1_CTTGTA_JD-
BS.1_val_1.fq.p009_bismark_bt2_pe.bam OUTPUT=J432_BHKVCGBCXX_Lane1_CTTGTA_JD-
BS_p009_sorted.bam SO=coordinate CREATE_INDEX=true
echo "done" > J432_BHKVCGBCXX_Lane1_CTTGTA_JD-BS_p009.status
```

```
==> ./sanchari/j432/bismark_aligned/qscripts/J432_AHHH5NBCXX_Lane2_GCCAAT_HPNE-
10xBS_p012.sh <==
```

```
#!/bin/bash
#$ -cwd
#$ -N bismark_alignment
#$ -j n
#$ -l h_vmem=5.8G
#$ -pe smp 5
#$ -S /bin/bash
#$ -m e
#$ -M kith.pradhan@einstein.yu.edu
```

```
module load bismark/0.14.5
module load bowtie2/2.2.3/gcc.4.4.7
module load samtools/1.2/gcc.4.4.7
module load picard-tools/1.92/java.1.8.0_20
```

```
SNAME=J432_AHHH5NBCXX_Lane2_GCCAAT_HPNE-10xBS_p012
```

```
FQ1=./trimmed/split/J432_AHHH5NBCXX_Lane2_GCCAAT_HPNE-10xBS.1_val_1.fq.p012
FQ2=./trimmed/split/J432_AHHH5NBCXX_Lane2_GCCAAT_HPNE-10xBS.2_val_2.fq.p012
REF=/home/kpradha1/projects/hg19/
bismark --multicore 1 --bowtie2 -p 4 /home/kpradha1/projects/hg19/ -1
./trimmed/split/J432_AHHH5NBCXX_Lane2_GCCAAT_HPNE-10xBS.1_val_1.fq.p012 -2
./trimmed/split/J432_AHHH5NBCXX_Lane2_GCCAAT_HPNE-10xBS.2_val_2.fq.p012
java -jar $(which SortSam.jar) INPUT=J432_AHHH5NBCXX_Lane2_GCCAAT_HPNE-
10xBS.1_val_1.fq.p012_bismark_bt2_pe.bam OUTPUT=J432_AHHH5NBCXX_Lane2_GCCAAT_HPNE-
10xBS_p012_sorted.bam SO=coordinate CREATE_INDEX=true
echo "done" > J432_AHHH5NBCXX_Lane2_GCCAAT_HPNE-10xBS_p012.status
```

```
==> ./sanchari/j432/bismark_aligned/qscripts/J432_BHKVCGBCXX_Lane1_CTTGTA_JD-
BS_p014.sh <==
```

```
#!/bin/bash
#$ -cwd
#$ -N bismark_alignment
#$ -j n
#$ -l h_vmem=5.8G
#$ -pe smp 5
#$ -S /bin/bash
#$ -m e
#$ -M kith.pradhan@einstein.yu.edu
```

```
module load bismark/0.14.5
module load bowtie2/2.2.3/gcc.4.4.7
module load samtools/1.2/gcc.4.4.7
module load picard-tools/1.92/java.1.8.0_20
```

```
SNAME=J432_BHKVCGBCXX_Lane1_CTTGTA_JD-BS_p014
FQ1=./trimmed/split/J432_BHKVCGBCXX_Lane1_CTTGTA_JD-BS.1_val_1.fq.p014
FQ2=./trimmed/split/J432_BHKVCGBCXX_Lane1_CTTGTA_JD-BS.2_val_2.fq.p014
REF=/home/kpradha1/projects/hg19/
bismark --multicore 1 --bowtie2 -p 4 /home/kpradha1/projects/hg19/ -1
./trimmed/split/J432_BHKVCGBCXX_Lane1_CTTGTA_JD-BS.1_val_1.fq.p014 -2
./trimmed/split/J432_BHKVCGBCXX_Lane1_CTTGTA_JD-BS.2_val_2.fq.p014
java -jar $(which SortSam.jar) INPUT=J432_BHKVCGBCXX_Lane1_CTTGTA_JD-
BS.1_val_1.fq.p014_bismark_bt2_pe.bam OUTPUT=J432_BHKVCGBCXX_Lane1_CTTGTA_JD-
BS_p014_sorted.bam SO=coordinate CREATE_INDEX=true
echo "done" > J432_BHKVCGBCXX_Lane1_CTTGTA_JD-BS_p014.status
```

```
==> ./sanchari/j432/bismark_aligned/qscripts/J432_AHHH5NBCXX_Lane1_ACAGTG_HPNE-
1_BS_p009.sh <==
```

```
#!/bin/bash
#$ -cwd
#$ -N bismark_alignment
#$ -j n
#$ -l h_vmem=5.8G
#$ -pe smp 5
#$ -S /bin/bash
#$ -m e
#$ -M kith.pradhan@einstein.yu.edu
```

```
module load bismark/0.14.5
module load bowtie2/2.2.3/gcc.4.4.7
module load samtools/1.2/gcc.4.4.7
module load picard-tools/1.92/java.1.8.0_20
```

```
SNAME=J432_AHHH5NBCXX_Lane1_ACAGTG_HPNE-1_BS_p009
FQ1=./trimmed/split/J432_AHHH5NBCXX_Lane1_ACAGTG_HPNE-1_BS.1_val_1.fq.p009
```

```
FQ2=./trimmed/split/J432_AHHH5NBCXX_Lane1_ACAGTG_HPNE-1_BS.2_val_2.fq.p009
REF=/home/kpradha1/projects/hg19/
bismark --multicore 1 --bowtie2 -p 4 /home/kpradha1/projects/hg19/ -1
./trimmed/split/J432_AHHH5NBCXX_Lane1_ACAGTG_HPNE-1_BS.1_val_1.fq.p009 -2
./trimmed/split/J432_AHHH5NBCXX_Lane1_ACAGTG_HPNE-1_BS.2_val_2.fq.p009
java -jar $(which SortSam.jar) INPUT=J432_AHHH5NBCXX_Lane1_ACAGTG_HPNE-
1_BS.1_val_1.fq.p009_bismark_bt2_pe.bam OUTPUT=J432_AHHH5NBCXX_Lane1_ACAGTG_HPNE-
1_BS_p009_sorted.bam SO=coordinate CREATE_INDEX=true
echo "done" > J432_AHHH5NBCXX_Lane1_ACAGTG_HPNE-1_BS_p009.status
```

```
==> ./sanchari/j432/bismark_aligned/qscripts/J432_AHHH5NBCXX_Lane2_GCCAAT_HPNE-
10xBS_p000.sh <==
```

```
#!/bin/bash
#$ -cwd
#$ -N bismark_alignment
#$ -j n
#$ -l h_vmem=5.8G
#$ -pe smp 5
#$ -S /bin/bash
#$ -m e
#$ -M kith.pradhan@einstein.yu.edu
```

```
module load bismark/0.14.5
module load bowtie2/2.2.3/gcc.4.4.7
module load samtools/1.2/gcc.4.4.7
module load picard-tools/1.92/java.1.8.0_20
```

```
SNAME=J432_AHHH5NBCXX_Lane2_GCCAAT_HPNE-10xBS_p000
FQ1=./trimmed/split/J432_AHHH5NBCXX_Lane2_GCCAAT_HPNE-10xBS.1_val_1.fq.p000
FQ2=./trimmed/split/J432_AHHH5NBCXX_Lane2_GCCAAT_HPNE-10xBS.2_val_2.fq.p000
REF=/home/kpradha1/projects/hg19/
bismark --multicore 1 --bowtie2 -p 4 /home/kpradha1/projects/hg19/ -1
./trimmed/split/J432_AHHH5NBCXX_Lane2_GCCAAT_HPNE-10xBS.1_val_1.fq.p000 -2
./trimmed/split/J432_AHHH5NBCXX_Lane2_GCCAAT_HPNE-10xBS.2_val_2.fq.p000
java -jar $(which SortSam.jar) INPUT=J432_AHHH5NBCXX_Lane2_GCCAAT_HPNE-
10xBS.1_val_1.fq.p000_bismark_bt2_pe.bam OUTPUT=J432_AHHH5NBCXX_Lane2_GCCAAT_HPNE-
10xBS_p000_sorted.bam SO=coordinate CREATE_INDEX=true
echo "done" > J432_AHHH5NBCXX_Lane2_GCCAAT_HPNE-10xBS_p000.status
```

```
==> ./sanchari/j432/bismark_aligned/qscripts/J432_AHHH5NBCXX_Lane1_ACAGTG_HPNE-
1_BS_p014.sh <==
```

```
#!/bin/bash
#$ -cwd
#$ -N bismark_alignment
#$ -j n
#$ -l h_vmem=5.8G
#$ -pe smp 5
#$ -S /bin/bash
#$ -m e
#$ -M kith.pradhan@einstein.yu.edu
```

```
module load bismark/0.14.5
module load bowtie2/2.2.3/gcc.4.4.7
module load samtools/1.2/gcc.4.4.7
module load picard-tools/1.92/java.1.8.0_20
```

```
SNAME=J432_AHHH5NBCXX_Lane1_ACAGTG_HPNE-1_BS_p014
FQ1=./trimmed/split/J432_AHHH5NBCXX_Lane1_ACAGTG_HPNE-1_BS.1_val_1.fq.p014
FQ2=./trimmed/split/J432_AHHH5NBCXX_Lane1_ACAGTG_HPNE-1_BS.2_val_2.fq.p014
```

```
REF=/home/kpradha1/projects/hg19/
bismark --multicore 1 --bowtie2 -p 4 /home/kpradha1/projects/hg19/ -1
../trimmed/split/J432_AHHH5NBCXX_Lane1_ACAGTG_HPNE-1_BS.1_val_1.fq.p014 -2
../trimmed/split/J432_AHHH5NBCXX_Lane1_ACAGTG_HPNE-1_BS.2_val_2.fq.p014
java -jar $(which SortSam.jar) INPUT=J432_AHHH5NBCXX_Lane1_ACAGTG_HPNE-
1_BS.1_val_1.fq.p014_bismark_bt2_pe.bam OUTPUT=J432_AHHH5NBCXX_Lane1_ACAGTG_HPNE-
1_BS_p014_sorted.bam SO=coordinate CREATE_INDEX=true
echo "done" > J432_AHHH5NBCXX_Lane1_ACAGTG_HPNE-1_BS_p014.status
```

```
==> ./sanchari/j432/bismark_aligned/qscripts/J432_AHHH5NBCXX_Lane1_ACAGTG_HPNE-
1_BS_p006.sh <==
```

```
#!/bin/bash
#$ -cwd
#$ -N bismark_alignment
#$ -j n
#$ -l h_vmem=5.8G
#$ -pe smp 5
#$ -S /bin/bash
#$ -m e
#$ -M kith.pradhan@einstein.yu.edu
```

```
module load bismark/0.14.5
module load bowtie2/2.2.3/gcc.4.4.7
module load samtools/1.2/gcc.4.4.7
module load picard-tools/1.92/java.1.8.0_20
```

```
SNAME=J432_AHHH5NBCXX_Lane1_ACAGTG_HPNE-1_BS_p006
FQ1=../trimmed/split/J432_AHHH5NBCXX_Lane1_ACAGTG_HPNE-1_BS.1_val_1.fq.p006
FQ2=../trimmed/split/J432_AHHH5NBCXX_Lane1_ACAGTG_HPNE-1_BS.2_val_2.fq.p006
REF=/home/kpradha1/projects/hg19/
bismark --multicore 1 --bowtie2 -p 4 /home/kpradha1/projects/hg19/ -1
../trimmed/split/J432_AHHH5NBCXX_Lane1_ACAGTG_HPNE-1_BS.1_val_1.fq.p006 -2
../trimmed/split/J432_AHHH5NBCXX_Lane1_ACAGTG_HPNE-1_BS.2_val_2.fq.p006
java -jar $(which SortSam.jar) INPUT=J432_AHHH5NBCXX_Lane1_ACAGTG_HPNE-
1_BS.1_val_1.fq.p006_bismark_bt2_pe.bam OUTPUT=J432_AHHH5NBCXX_Lane1_ACAGTG_HPNE-
1_BS_p006_sorted.bam SO=coordinate CREATE_INDEX=true
echo "done" > J432_AHHH5NBCXX_Lane1_ACAGTG_HPNE-1_BS_p006.status
```

```
==> ./sanchari/j432/bismark_aligned/qscripts/J432_BHKVCGBCXX_Lane1_CTTGTA_JD-
BS_p006.sh <==
```

```
#!/bin/bash
#$ -cwd
#$ -N bismark_alignment
#$ -j n
#$ -l h_vmem=5.8G
#$ -pe smp 5
#$ -S /bin/bash
#$ -m e
#$ -M kith.pradhan@einstein.yu.edu
```

```
module load bismark/0.14.5
module load bowtie2/2.2.3/gcc.4.4.7
module load samtools/1.2/gcc.4.4.7
module load picard-tools/1.92/java.1.8.0_20
```

```
SNAME=J432_BHKVCGBCXX_Lane1_CTTGTA_JD-BS_p006
FQ1=../trimmed/split/J432_BHKVCGBCXX_Lane1_CTTGTA_JD-BS.1_val_1.fq.p006
FQ2=../trimmed/split/J432_BHKVCGBCXX_Lane1_CTTGTA_JD-BS.2_val_2.fq.p006
REF=/home/kpradha1/projects/hg19/
```

```
bismark --multicore 1 --bowtie2 -p 4 /home/kpradha1/projects/hg19/ -1
../trimmed/split/J432_BHKVCGBCXX_Lane1_CTTGTA_JD-BS.1_val_1.fq.p006 -2
../trimmed/split/J432_BHKVCGBCXX_Lane1_CTTGTA_JD-BS.2_val_2.fq.p006
java -jar $(which SortSam.jar) INPUT=J432_BHKVCGBCXX_Lane1_CTTGTA_JD-
BS.1_val_1.fq.p006_bismark_bt2_pe.bam OUTPUT=J432_BHKVCGBCXX_Lane1_CTTGTA_JD-
BS_p006_sorted.bam SO=coordinate CREATE_INDEX=true
echo "done" > J432_BHKVCGBCXX_Lane1_CTTGTA_JD-BS_p006.status
```

```
==> ./sanchari/j432/bismark_aligned/qscripts/J432_AHHH5NBCXX_Lane2_GCCAAT_HPNE-
10xBS_p009.sh <==
```

```
#!/bin/bash
#$ -cwd
#$ -N bismark_alignment
#$ -j n
#$ -l h_vmem=5.8G
#$ -pe smp 5
#$ -S /bin/bash
#$ -m e
#$ -M kith.pradhan@einstein.yu.edu
```

```
module load bismark/0.14.5
module load bowtie2/2.2.3/gcc.4.4.7
module load samtools/1.2/gcc.4.4.7
module load picard-tools/1.92/java.1.8.0_20
```

```
SNAME=J432_AHHH5NBCXX_Lane2_GCCAAT_HPNE-10xBS_p009
FQ1=../trimmed/split/J432_AHHH5NBCXX_Lane2_GCCAAT_HPNE-10xBS.1_val_1.fq.p009
FQ2=../trimmed/split/J432_AHHH5NBCXX_Lane2_GCCAAT_HPNE-10xBS.2_val_2.fq.p009
REF=/home/kpradha1/projects/hg19/
bismark --multicore 1 --bowtie2 -p 4 /home/kpradha1/projects/hg19/ -1
../trimmed/split/J432_AHHH5NBCXX_Lane2_GCCAAT_HPNE-10xBS.1_val_1.fq.p009 -2
../trimmed/split/J432_AHHH5NBCXX_Lane2_GCCAAT_HPNE-10xBS.2_val_2.fq.p009
java -jar $(which SortSam.jar) INPUT=J432_AHHH5NBCXX_Lane2_GCCAAT_HPNE-
10xBS.1_val_1.fq.p009_bismark_bt2_pe.bam OUTPUT=J432_AHHH5NBCXX_Lane2_GCCAAT_HPNE-
10xBS_p009_sorted.bam SO=coordinate CREATE_INDEX=true
echo "done" > J432_AHHH5NBCXX_Lane2_GCCAAT_HPNE-10xBS_p009.status
```

```
==> ./sanchari/j432/bismark_aligned/qscripts/J432_AHHH5NBCXX_Lane1_ACAGTG_HPNE-
1_BS_p005.sh <==
```

```
#!/bin/bash
#$ -cwd
#$ -N bismark_alignment
#$ -j n
#$ -l h_vmem=5.8G
#$ -pe smp 5
#$ -S /bin/bash
#$ -m e
#$ -M kith.pradhan@einstein.yu.edu
```

```
module load bismark/0.14.5
module load bowtie2/2.2.3/gcc.4.4.7
module load samtools/1.2/gcc.4.4.7
module load picard-tools/1.92/java.1.8.0_20
```

```
SNAME=J432_AHHH5NBCXX_Lane1_ACAGTG_HPNE-1_BS_p005
FQ1=../trimmed/split/J432_AHHH5NBCXX_Lane1_ACAGTG_HPNE-1_BS.1_val_1.fq.p005
FQ2=../trimmed/split/J432_AHHH5NBCXX_Lane1_ACAGTG_HPNE-1_BS.2_val_2.fq.p005
REF=/home/kpradha1/projects/hg19/
bismark --multicore 1 --bowtie2 -p 4 /home/kpradha1/projects/hg19/ -1
```

```
../trimmed/split/J432_AHHH5NBCXX_Lane1_ACAGTG_HPNE-1_BS.1_val_1.fq.p005 -2
../trimmed/split/J432_AHHH5NBCXX_Lane1_ACAGTG_HPNE-1_BS.2_val_2.fq.p005
java -jar $(which SortSam.jar) INPUT=J432_AHHH5NBCXX_Lane1_ACAGTG_HPNE-
1_BS.1_val_1.fq.p005_bismark_bt2_pe.bam OUTPUT=J432_AHHH5NBCXX_Lane1_ACAGTG_HPNE-
1_BS_p005_sorted.bam SO=coordinate CREATE_INDEX=true
echo "done" > J432_AHHH5NBCXX_Lane1_ACAGTG_HPNE-1_BS_p005.status
```

```
==> ./sanchari/j432/bismark_aligned/qscripts/J432_BHKVCGBCXX_Lane2_GTGAAA_JD-
0xBS_p012.sh <==
#!/bin/bash
#$ -cwd
#$ -N bismark_alignment
#$ -j n
#$ -l h_vmem=5.8G
#$ -pe smp 5
#$ -S /bin/bash
#$ -m e
#$ -M kith.pradhan@einstein.yu.edu
```

```
module load bismark/0.14.5
module load bowtie2/2.2.3/gcc.4.4.7
module load samtools/1.2/gcc.4.4.7
module load picard-tools/1.92/java.1.8.0_20
```

```
SNAME=J432_BHKVCGBCXX_Lane2_GTGAAA_JD-0xBS_p012
FQ1=../trimmed/split/J432_BHKVCGBCXX_Lane2_GTGAAA_JD-0xBS.1_val_1.fq.p012
FQ2=../trimmed/split/J432_BHKVCGBCXX_Lane2_GTGAAA_JD-0xBS.2_val_2.fq.p012
REF=/home/kpradha1/projects/hg19/
bismark --multicore 1 --bowtie2 -p 4 /home/kpradha1/projects/hg19/ -1
../trimmed/split/J432_BHKVCGBCXX_Lane2_GTGAAA_JD-0xBS.1_val_1.fq.p012 -2
../trimmed/split/J432_BHKVCGBCXX_Lane2_GTGAAA_JD-0xBS.2_val_2.fq.p012
java -jar $(which SortSam.jar) INPUT=J432_BHKVCGBCXX_Lane2_GTGAAA_JD-
0xBS.1_val_1.fq.p012_bismark_bt2_pe.bam OUTPUT=J432_BHKVCGBCXX_Lane2_GTGAAA_JD-
0xBS_p012_sorted.bam SO=coordinate CREATE_INDEX=true
echo "done" > J432_BHKVCGBCXX_Lane2_GTGAAA_JD-0xBS_p012.status
```

```
==> ./sanchari/j432/bismark_aligned/qscripts/J432_AHHH5NBCXX_Lane1_ACAGTG_HPNE-
1_BS_p008.sh <==
#!/bin/bash
#$ -cwd
#$ -N bismark_alignment
#$ -j n
#$ -l h_vmem=5.8G
#$ -pe smp 5
#$ -S /bin/bash
#$ -m e
#$ -M kith.pradhan@einstein.yu.edu
```

```
module load bismark/0.14.5
module load bowtie2/2.2.3/gcc.4.4.7
module load samtools/1.2/gcc.4.4.7
module load picard-tools/1.92/java.1.8.0_20
```

```
SNAME=J432_AHHH5NBCXX_Lane1_ACAGTG_HPNE-1_BS_p008
FQ1=../trimmed/split/J432_AHHH5NBCXX_Lane1_ACAGTG_HPNE-1_BS.1_val_1.fq.p008
FQ2=../trimmed/split/J432_AHHH5NBCXX_Lane1_ACAGTG_HPNE-1_BS.2_val_2.fq.p008
REF=/home/kpradha1/projects/hg19/
bismark --multicore 1 --bowtie2 -p 4 /home/kpradha1/projects/hg19/ -1
../trimmed/split/J432_AHHH5NBCXX_Lane1_ACAGTG_HPNE-1_BS.1_val_1.fq.p008 -2
```

```
../trimmed/split/J432_AHHH5NBCXX_Lane1_ACAGTG_HPNE-1_BS.2_val_2.fq.p008
java -jar $(which SortSam.jar) INPUT=J432_AHHH5NBCXX_Lane1_ACAGTG_HPNE-
1_BS.1_val_1.fq.p008_bismark_bt2_pe.bam OUTPUT=J432_AHHH5NBCXX_Lane1_ACAGTG_HPNE-
1_BS.p008_sorted.bam SO=coordinate CREATE_INDEX=true
echo "done" > J432_AHHH5NBCXX_Lane1_ACAGTG_HPNE-1_BS.p008.status
```

```
==> ./sanchari/j432/bismark_aligned/qscripts/J432_BHKVCGBCXX_Lane1_CTTGTA_JD-
BS.p002.sh <==
```

```
#!/bin/bash
#$ -cwd
#$ -N bismark_alignment
#$ -j n
#$ -l h_vmem=5.8G
#$ -pe smp 5
#$ -S /bin/bash
#$ -m e
#$ -M kith.pradhan@einstein.yu.edu
```

```
module load bismark/0.14.5
module load bowtie2/2.2.3/gcc.4.4.7
module load samtools/1.2/gcc.4.4.7
module load picard-tools/1.92/java.1.8.0_20
```

```
SNAME=J432_BHKVCGBCXX_Lane1_CTTGTA_JD-BS.p002
FQ1=../trimmed/split/J432_BHKVCGBCXX_Lane1_CTTGTA_JD-BS.1_val_1.fq.p002
FQ2=../trimmed/split/J432_BHKVCGBCXX_Lane1_CTTGTA_JD-BS.2_val_2.fq.p002
REF=/home/kpradha1/projects/hg19/
bismark --multicore 1 --bowtie2 -p 4 /home/kpradha1/projects/hg19/ -1
../trimmed/split/J432_BHKVCGBCXX_Lane1_CTTGTA_JD-BS.1_val_1.fq.p002 -2
../trimmed/split/J432_BHKVCGBCXX_Lane1_CTTGTA_JD-BS.2_val_2.fq.p002
java -jar $(which SortSam.jar) INPUT=J432_BHKVCGBCXX_Lane1_CTTGTA_JD-
BS.1_val_1.fq.p002_bismark_bt2_pe.bam OUTPUT=J432_BHKVCGBCXX_Lane1_CTTGTA_JD-
BS.p002_sorted.bam SO=coordinate CREATE_INDEX=true
echo "done" > J432_BHKVCGBCXX_Lane1_CTTGTA_JD-BS.p002.status
```

```
==> ./sanchari/j432/bismark_aligned/qscripts/J432_BHKVCGBCXX_Lane2_GTGAAA_JD-
0xBS.p013.sh <==
```

```
#!/bin/bash
#$ -cwd
#$ -N bismark_alignment
#$ -j n
#$ -l h_vmem=5.8G
#$ -pe smp 5
#$ -S /bin/bash
#$ -m e
#$ -M kith.pradhan@einstein.yu.edu
```

```
module load bismark/0.14.5
module load bowtie2/2.2.3/gcc.4.4.7
module load samtools/1.2/gcc.4.4.7
module load picard-tools/1.92/java.1.8.0_20
```

```
SNAME=J432_BHKVCGBCXX_Lane2_GTGAAA_JD-0xBS.p013
FQ1=../trimmed/split/J432_BHKVCGBCXX_Lane2_GTGAAA_JD-0xBS.1_val_1.fq.p013
FQ2=../trimmed/split/J432_BHKVCGBCXX_Lane2_GTGAAA_JD-0xBS.2_val_2.fq.p013
REF=/home/kpradha1/projects/hg19/
bismark --multicore 1 --bowtie2 -p 4 /home/kpradha1/projects/hg19/ -1
../trimmed/split/J432_BHKVCGBCXX_Lane2_GTGAAA_JD-0xBS.1_val_1.fq.p013 -2
../trimmed/split/J432_BHKVCGBCXX_Lane2_GTGAAA_JD-0xBS.2_val_2.fq.p013
```

```
java -jar $(which SortSam.jar) INPUT=J432_BHKVCGBCXX_Lane2_GTGAAA_JD-
0xBS.1_val_1.fq.p013_bismark_bt2_pe.bam OUTPUT=J432_BHKVCGBCXX_Lane2_GTGAAA_JD-
0xBS_p013_sorted.bam SO=coordinate CREATE_INDEX=true
echo "done" > J432_BHKVCGBCXX_Lane2_GTGAAA_JD-0xBS_p013.status
```

```
==> ./sanchari/j432/bismark_aligned/qscripts/J432_AHHH5NBCXX_Lane2_GCCAAT_HPNE-
10xBS_p010.sh <==
```

```
#!/bin/bash
#$ -cwd
#$ -N bismark_alignment
#$ -j n
#$ -l h_vmem=5.8G
#$ -pe smp 5
#$ -S /bin/bash
#$ -m e
#$ -M kith.pradhan@einstein.yu.edu
```

```
module load bismark/0.14.5
module load bowtie2/2.2.3/gcc.4.4.7
module load samtools/1.2/gcc.4.4.7
module load picard-tools/1.92/java.1.8.0_20
```

```
SNAME=J432_AHHH5NBCXX_Lane2_GCCAAT_HPNE-10xBS_p010
FQ1=./trimmed/split/J432_AHHH5NBCXX_Lane2_GCCAAT_HPNE-10xBS.1_val_1.fq.p010
FQ2=./trimmed/split/J432_AHHH5NBCXX_Lane2_GCCAAT_HPNE-10xBS.2_val_2.fq.p010
REF=/home/kpradha1/projects/hg19/
bismark --multicore 1 --bowtie2 -p 4 /home/kpradha1/projects/hg19/ -1
./trimmed/split/J432_AHHH5NBCXX_Lane2_GCCAAT_HPNE-10xBS.1_val_1.fq.p010 -2
./trimmed/split/J432_AHHH5NBCXX_Lane2_GCCAAT_HPNE-10xBS.2_val_2.fq.p010
java -jar $(which SortSam.jar) INPUT=J432_AHHH5NBCXX_Lane2_GCCAAT_HPNE-
10xBS.1_val_1.fq.p010_bismark_bt2_pe.bam OUTPUT=J432_AHHH5NBCXX_Lane2_GCCAAT_HPNE-
10xBS_p010_sorted.bam SO=coordinate CREATE_INDEX=true
echo "done" > J432_AHHH5NBCXX_Lane2_GCCAAT_HPNE-10xBS_p010.status
```

```
==> ./sanchari/j432/bismark_aligned/qscripts/J432_BHKVCGBCXX_Lane2_GTGAAA_JD-
0xBS_p003.sh <==
```

```
#!/bin/bash
#$ -cwd
#$ -N bismark_alignment
#$ -j n
#$ -l h_vmem=5.8G
#$ -pe smp 5
#$ -S /bin/bash
#$ -m e
#$ -M kith.pradhan@einstein.yu.edu
```

```
module load bismark/0.14.5
module load bowtie2/2.2.3/gcc.4.4.7
module load samtools/1.2/gcc.4.4.7
module load picard-tools/1.92/java.1.8.0_20
```

```
SNAME=J432_BHKVCGBCXX_Lane2_GTGAAA_JD-0xBS_p003
FQ1=./trimmed/split/J432_BHKVCGBCXX_Lane2_GTGAAA_JD-0xBS.1_val_1.fq.p003
FQ2=./trimmed/split/J432_BHKVCGBCXX_Lane2_GTGAAA_JD-0xBS.2_val_2.fq.p003
REF=/home/kpradha1/projects/hg19/
bismark --multicore 1 --bowtie2 -p 4 /home/kpradha1/projects/hg19/ -1
./trimmed/split/J432_BHKVCGBCXX_Lane2_GTGAAA_JD-0xBS.1_val_1.fq.p003 -2
./trimmed/split/J432_BHKVCGBCXX_Lane2_GTGAAA_JD-0xBS.2_val_2.fq.p003
java -jar $(which SortSam.jar) INPUT=J432_BHKVCGBCXX_Lane2_GTGAAA_JD-
```



```
0xBS.1_val_1.fq.p003_bismark_bt2_pe.bam OUTPUT=J432_BHKVCGBCXX_Lane2_GTGAAA_JD-
0xBS_p003_sorted.bam SO=coordinate CREATE_INDEX=true
echo "done" > J432_BHKVCGBCXX_Lane2_GTGAAA_JD-0xBS_p003.status
```

```
==> ./sanchari/j432/bismark_aligned/qscripts/J432_BHKVCGBCXX_Lane1_CTTGTA_JD-
BS_p007.sh <==
#!/bin/bash
#$ -cwd
#$ -N bismark_alignment
#$ -j n
#$ -l h_vmem=5.8G
#$ -pe smp 5
#$ -S /bin/bash
#$ -m e
#$ -M kith.pradhan@einstein.yu.edu
```

```
module load bismark/0.14.5
module load bowtie2/2.2.3/gcc.4.4.7
module load samtools/1.2/gcc.4.4.7
module load picard-tools/1.92/java.1.8.0_20
```

```
SNAME=J432_BHKVCGBCXX_Lane1_CTTGTA_JD-BS_p007
FQ1=./trimmed/split/J432_BHKVCGBCXX_Lane1_CTTGTA_JD-BS.1_val_1.fq.p007
FQ2=./trimmed/split/J432_BHKVCGBCXX_Lane1_CTTGTA_JD-BS.2_val_2.fq.p007
REF=/home/kpradha1/projects/hg19/
bismark --multicore 1 --bowtie2 -p 4 /home/kpradha1/projects/hg19/ -1
./trimmed/split/J432_BHKVCGBCXX_Lane1_CTTGTA_JD-BS.1_val_1.fq.p007 -2
./trimmed/split/J432_BHKVCGBCXX_Lane1_CTTGTA_JD-BS.2_val_2.fq.p007
java -jar $(which SortSam.jar) INPUT=J432_BHKVCGBCXX_Lane1_CTTGTA_JD-
BS.1_val_1.fq.p007_bismark_bt2_pe.bam OUTPUT=J432_BHKVCGBCXX_Lane1_CTTGTA_JD-
BS_p007_sorted.bam SO=coordinate CREATE_INDEX=true
echo "done" > J432_BHKVCGBCXX_Lane1_CTTGTA_JD-BS_p007.status
```

```
==> ./sanchari/j432/bismark_aligned/qscripts/J432_BHKVCGBCXX_Lane1_CTTGTA_JD-
BS_p005.sh <==
#!/bin/bash
#$ -cwd
#$ -N bismark_alignment
#$ -j n
#$ -l h_vmem=5.8G
#$ -pe smp 5
#$ -S /bin/bash
#$ -m e
#$ -M kith.pradhan@einstein.yu.edu
```

```
module load bismark/0.14.5
module load bowtie2/2.2.3/gcc.4.4.7
module load samtools/1.2/gcc.4.4.7
module load picard-tools/1.92/java.1.8.0_20
```

```
SNAME=J432_BHKVCGBCXX_Lane1_CTTGTA_JD-BS_p005
FQ1=./trimmed/split/J432_BHKVCGBCXX_Lane1_CTTGTA_JD-BS.1_val_1.fq.p005
FQ2=./trimmed/split/J432_BHKVCGBCXX_Lane1_CTTGTA_JD-BS.2_val_2.fq.p005
REF=/home/kpradha1/projects/hg19/
bismark --multicore 1 --bowtie2 -p 4 /home/kpradha1/projects/hg19/ -1
./trimmed/split/J432_BHKVCGBCXX_Lane1_CTTGTA_JD-BS.1_val_1.fq.p005 -2
./trimmed/split/J432_BHKVCGBCXX_Lane1_CTTGTA_JD-BS.2_val_2.fq.p005
java -jar $(which SortSam.jar) INPUT=J432_BHKVCGBCXX_Lane1_CTTGTA_JD-
BS.1_val_1.fq.p005_bismark_bt2_pe.bam OUTPUT=J432_BHKVCGBCXX_Lane1_CTTGTA_JD-
```

```
BS_p005_sorted.bam S0=coordinate CREATE_INDEX=true
echo "done" > J432_BHKVCGBCXX_Lane1_CTTGTA_JD-BS_p005.status
```

```
==> ./sanchari/j432/bismark_aligned/qscripts/J432_BHKVCGBCXX_Lane1_CTTGTA_JD-
BS_p011.sh <==
#!/bin/bash
#$ -cwd
#$ -N bismark_alignment
#$ -j n
#$ -l h_vmem=5.8G
#$ -pe smp 5
#$ -S /bin/bash
#$ -m e
#$ -M kith.pradhan@einstein.yu.edu
```

```
module load bismark/0.14.5
module load bowtie2/2.2.3/gcc.4.4.7
module load samtools/1.2/gcc.4.4.7
module load picard-tools/1.92/java.1.8.0_20
```

```
SNAME=J432_BHKVCGBCXX_Lane1_CTTGTA_JD-BS_p011
FQ1=./trimmed/split/J432_BHKVCGBCXX_Lane1_CTTGTA_JD-BS.1_val_1.fq.p011
FQ2=./trimmed/split/J432_BHKVCGBCXX_Lane1_CTTGTA_JD-BS.2_val_2.fq.p011
REF=/home/kpradha1/projects/hg19/
bismark --multicore 1 --bowtie2 -p 4 /home/kpradha1/projects/hg19/ -1
./trimmed/split/J432_BHKVCGBCXX_Lane1_CTTGTA_JD-BS.1_val_1.fq.p011 -2
./trimmed/split/J432_BHKVCGBCXX_Lane1_CTTGTA_JD-BS.2_val_2.fq.p011
java -jar $(which SortSam.jar) INPUT=J432_BHKVCGBCXX_Lane1_CTTGTA_JD-
BS.1_val_1.fq.p011_bismark_bt2_pe.bam OUTPUT=J432_BHKVCGBCXX_Lane1_CTTGTA_JD-
BS_p011_sorted.bam S0=coordinate CREATE_INDEX=true
echo "done" > J432_BHKVCGBCXX_Lane1_CTTGTA_JD-BS_p011.status
```

```
==> ./sanchari/j432/bismark_aligned/qscripts/J432_AHHH5NBCXX_Lane2_GCCAAT_HPNE-
10xBS_p002.sh <==
#!/bin/bash
#$ -cwd
#$ -N bismark_alignment
#$ -j n
#$ -l h_vmem=5.8G
#$ -pe smp 5
#$ -S /bin/bash
#$ -m e
#$ -M kith.pradhan@einstein.yu.edu
```

```
module load bismark/0.14.5
module load bowtie2/2.2.3/gcc.4.4.7
module load samtools/1.2/gcc.4.4.7
module load picard-tools/1.92/java.1.8.0_20
```

```
SNAME=J432_AHHH5NBCXX_Lane2_GCCAAT_HPNE-10xBS_p002
FQ1=./trimmed/split/J432_AHHH5NBCXX_Lane2_GCCAAT_HPNE-10xBS.1_val_1.fq.p002
FQ2=./trimmed/split/J432_AHHH5NBCXX_Lane2_GCCAAT_HPNE-10xBS.2_val_2.fq.p002
REF=/home/kpradha1/projects/hg19/
bismark --multicore 1 --bowtie2 -p 4 /home/kpradha1/projects/hg19/ -1
./trimmed/split/J432_AHHH5NBCXX_Lane2_GCCAAT_HPNE-10xBS.1_val_1.fq.p002 -2
./trimmed/split/J432_AHHH5NBCXX_Lane2_GCCAAT_HPNE-10xBS.2_val_2.fq.p002
java -jar $(which SortSam.jar) INPUT=J432_AHHH5NBCXX_Lane2_GCCAAT_HPNE-
10xBS.1_val_1.fq.p002_bismark_bt2_pe.bam OUTPUT=J432_AHHH5NBCXX_Lane2_GCCAAT_HPNE-
10xBS_p002_sorted.bam S0=coordinate CREATE_INDEX=true
```

```
echo "done" > J432_AHHH5NBCXX_Lane2_GCCAAT_HPNE-10xBS_p002.status
```

```
==> ./sanchari/j432/bismark_aligned/qscripts/J432_BHKVCGBCXX_Lane1_CTTGTA_JD-BS_p013.sh <==
```

```
#!/bin/bash
#$ -cwd
#$ -N bismark_alignment
#$ -j n
#$ -l h_vmem=5.8G
#$ -pe smp 5
#$ -S /bin/bash
#$ -m e
#$ -M kith.pradhan@einstein.yu.edu
```

```
module load bismark/0.14.5
module load bowtie2/2.2.3/gcc.4.4.7
module load samtools/1.2/gcc.4.4.7
module load picard-tools/1.92/java.1.8.0_20
```

```
SNAME=J432_BHKVCGBCXX_Lane1_CTTGTA_JD-BS_p013
FQ1=./trimmed/split/J432_BHKVCGBCXX_Lane1_CTTGTA_JD-BS.1_val_1.fq.p013
FQ2=./trimmed/split/J432_BHKVCGBCXX_Lane1_CTTGTA_JD-BS.2_val_2.fq.p013
REF=/home/kpradha1/projects/hg19/
bismark --multicore 1 --bowtie2 -p 4 /home/kpradha1/projects/hg19/ -1
./trimmed/split/J432_BHKVCGBCXX_Lane1_CTTGTA_JD-BS.1_val_1.fq.p013 -2
./trimmed/split/J432_BHKVCGBCXX_Lane1_CTTGTA_JD-BS.2_val_2.fq.p013
java -jar $(which SortSam.jar) INPUT=J432_BHKVCGBCXX_Lane1_CTTGTA_JD-BS.1_val_1.fq.p013_bismark_bt2_pe.bam OUTPUT=J432_BHKVCGBCXX_Lane1_CTTGTA_JD-BS_p013_sorted.bam SO=coordinate CREATE_INDEX=true
echo "done" > J432_BHKVCGBCXX_Lane1_CTTGTA_JD-BS_p013.status
```

```
==> ./sanchari/j432/bismark_aligned/qscripts/J432_BHKVCGBCXX_Lane1_CTTGTA_JD-BS_p015.sh <==
```

```
#!/bin/bash
#$ -cwd
#$ -N bismark_alignment
#$ -j n
#$ -l h_vmem=5.8G
#$ -pe smp 5
#$ -S /bin/bash
#$ -m e
#$ -M kith.pradhan@einstein.yu.edu
```

```
module load bismark/0.14.5
module load bowtie2/2.2.3/gcc.4.4.7
module load samtools/1.2/gcc.4.4.7
module load picard-tools/1.92/java.1.8.0_20
```

```
SNAME=J432_BHKVCGBCXX_Lane1_CTTGTA_JD-BS_p015
FQ1=./trimmed/split/J432_BHKVCGBCXX_Lane1_CTTGTA_JD-BS.1_val_1.fq.p015
FQ2=./trimmed/split/J432_BHKVCGBCXX_Lane1_CTTGTA_JD-BS.2_val_2.fq.p015
REF=/home/kpradha1/projects/hg19/
bismark --multicore 1 --bowtie2 -p 4 /home/kpradha1/projects/hg19/ -1
./trimmed/split/J432_BHKVCGBCXX_Lane1_CTTGTA_JD-BS.1_val_1.fq.p015 -2
./trimmed/split/J432_BHKVCGBCXX_Lane1_CTTGTA_JD-BS.2_val_2.fq.p015
java -jar $(which SortSam.jar) INPUT=J432_BHKVCGBCXX_Lane1_CTTGTA_JD-BS.1_val_1.fq.p015_bismark_bt2_pe.bam OUTPUT=J432_BHKVCGBCXX_Lane1_CTTGTA_JD-BS_p015_sorted.bam SO=coordinate CREATE_INDEX=true
echo "done" > J432_BHKVCGBCXX_Lane1_CTTGTA_JD-BS_p015.status
```

```
==> ./sanchari/j432/bismark_aligned/qscripts/J432_BHKVCGBCXX_Lane1_CTTGTA_JD-BS_p012.sh <==
#!/bin/bash
#$ -cwd
#$ -N bismark_alignment
#$ -j n
#$ -l h_vmem=5.8G
#$ -pe smp 5
#$ -S /bin/bash
#$ -m e
#$ -M kith.pradhan@einstein.yu.edu
```

```
module load bismark/0.14.5
module load bowtie2/2.2.3/gcc.4.4.7
module load samtools/1.2/gcc.4.4.7
module load picard-tools/1.92/java.1.8.0_20
```

```
SNAME=J432_BHKVCGBCXX_Lane1_CTTGTA_JD-BS_p012
FQ1=./trimmed/split/J432_BHKVCGBCXX_Lane1_CTTGTA_JD-BS.1_val_1.fq.p012
FQ2=./trimmed/split/J432_BHKVCGBCXX_Lane1_CTTGTA_JD-BS.2_val_2.fq.p012
REF=/home/kpradha1/projects/hg19/
bismark --multicore 1 --bowtie2 -p 4 /home/kpradha1/projects/hg19/ -1
./trimmed/split/J432_BHKVCGBCXX_Lane1_CTTGTA_JD-BS.1_val_1.fq.p012 -2
./trimmed/split/J432_BHKVCGBCXX_Lane1_CTTGTA_JD-BS.2_val_2.fq.p012
java -jar $(which SortSam.jar) INPUT=J432_BHKVCGBCXX_Lane1_CTTGTA_JD-BS.1_val_1.fq.p012_bismark_bt2_pe.bam OUTPUT=J432_BHKVCGBCXX_Lane1_CTTGTA_JD-BS_p012_sorted.bam SO=coordinate CREATE_INDEX=true
echo "done" > J432_BHKVCGBCXX_Lane1_CTTGTA_JD-BS_p012.status
```

```
==> ./sanchari/j432/bismark_aligned/qscripts/J432_AHHH5NBCXX_Lane1_ACAGTG_HPNE-1_BS_p013.sh <==
#!/bin/bash
#$ -cwd
#$ -N bismark_alignment
#$ -j n
#$ -l h_vmem=5.8G
#$ -pe smp 5
#$ -S /bin/bash
#$ -m e
#$ -M kith.pradhan@einstein.yu.edu
```

```
module load bismark/0.14.5
module load bowtie2/2.2.3/gcc.4.4.7
module load samtools/1.2/gcc.4.4.7
module load picard-tools/1.92/java.1.8.0_20
```

```
SNAME=J432_AHHH5NBCXX_Lane1_ACAGTG_HPNE-1_BS_p013
FQ1=./trimmed/split/J432_AHHH5NBCXX_Lane1_ACAGTG_HPNE-1_BS.1_val_1.fq.p013
FQ2=./trimmed/split/J432_AHHH5NBCXX_Lane1_ACAGTG_HPNE-1_BS.2_val_2.fq.p013
REF=/home/kpradha1/projects/hg19/
bismark --multicore 1 --bowtie2 -p 4 /home/kpradha1/projects/hg19/ -1
./trimmed/split/J432_AHHH5NBCXX_Lane1_ACAGTG_HPNE-1_BS.1_val_1.fq.p013 -2
./trimmed/split/J432_AHHH5NBCXX_Lane1_ACAGTG_HPNE-1_BS.2_val_2.fq.p013
java -jar $(which SortSam.jar) INPUT=J432_AHHH5NBCXX_Lane1_ACAGTG_HPNE-1_BS.1_val_1.fq.p013_bismark_bt2_pe.bam OUTPUT=J432_AHHH5NBCXX_Lane1_ACAGTG_HPNE-1_BS_p013_sorted.bam SO=coordinate CREATE_INDEX=true
echo "done" > J432_AHHH5NBCXX_Lane1_ACAGTG_HPNE-1_BS_p013.status
```

```
==> ./sanchari/j432/bismark_aligned/qscripts/J432_BHKVCGBCXX_Lane2_GTGAAA_JD-
0xBS_p010.sh <==
#!/bin/bash
#$ -cwd
#$ -N bismark_alignment
#$ -j n
#$ -l h_vmem=5.8G
#$ -pe smp 5
#$ -S /bin/bash
#$ -m e
#$ -M kith.pradhan@einstein.yu.edu
```

```
module load bismark/0.14.5
module load bowtie2/2.2.3/gcc.4.4.7
module load samtools/1.2/gcc.4.4.7
module load picard-tools/1.92/java.1.8.0_20
```

```
SNAME=J432_BHKVCGBCXX_Lane2_GTGAAA_JD-0xBS_p010
FQ1=./trimmed/split/J432_BHKVCGBCXX_Lane2_GTGAAA_JD-0xBS.1_val_1.fq.p010
FQ2=./trimmed/split/J432_BHKVCGBCXX_Lane2_GTGAAA_JD-0xBS.2_val_2.fq.p010
REF=/home/kpradha1/projects/hg19/
bismark --multicore 1 --bowtie2 -p 4 /home/kpradha1/projects/hg19/ -1
./trimmed/split/J432_BHKVCGBCXX_Lane2_GTGAAA_JD-0xBS.1_val_1.fq.p010 -2
./trimmed/split/J432_BHKVCGBCXX_Lane2_GTGAAA_JD-0xBS.2_val_2.fq.p010
java -jar $(which SortSam.jar) INPUT=J432_BHKVCGBCXX_Lane2_GTGAAA_JD-
0xBS.1_val_1.fq.p010_bismark_bt2_pe.bam OUTPUT=J432_BHKVCGBCXX_Lane2_GTGAAA_JD-
0xBS_p010_sorted.bam SO=coordinate CREATE_INDEX=true
echo "done" > J432_BHKVCGBCXX_Lane2_GTGAAA_JD-0xBS_p010.status
```

```
==> ./sanchari/j432/bismark_aligned/qscripts/J432_AHHH5NBCXX_Lane2_GCCAAT_HPNE-
10xBS_p014.sh <==
#!/bin/bash
#$ -cwd
#$ -N bismark_alignment
#$ -j n
#$ -l h_vmem=5.8G
#$ -pe smp 5
#$ -S /bin/bash
#$ -m e
#$ -M kith.pradhan@einstein.yu.edu
```

```
module load bismark/0.14.5
module load bowtie2/2.2.3/gcc.4.4.7
module load samtools/1.2/gcc.4.4.7
module load picard-tools/1.92/java.1.8.0_20
```

```
SNAME=J432_AHHH5NBCXX_Lane2_GCCAAT_HPNE-10xBS_p014
FQ1=./trimmed/split/J432_AHHH5NBCXX_Lane2_GCCAAT_HPNE-10xBS.1_val_1.fq.p014
FQ2=./trimmed/split/J432_AHHH5NBCXX_Lane2_GCCAAT_HPNE-10xBS.2_val_2.fq.p014
REF=/home/kpradha1/projects/hg19/
bismark --multicore 1 --bowtie2 -p 4 /home/kpradha1/projects/hg19/ -1
./trimmed/split/J432_AHHH5NBCXX_Lane2_GCCAAT_HPNE-10xBS.1_val_1.fq.p014 -2
./trimmed/split/J432_AHHH5NBCXX_Lane2_GCCAAT_HPNE-10xBS.2_val_2.fq.p014
java -jar $(which SortSam.jar) INPUT=J432_AHHH5NBCXX_Lane2_GCCAAT_HPNE-
10xBS.1_val_1.fq.p014_bismark_bt2_pe.bam OUTPUT=J432_AHHH5NBCXX_Lane2_GCCAAT_HPNE-
10xBS_p014_sorted.bam SO=coordinate CREATE_INDEX=true
echo "done" > J432_AHHH5NBCXX_Lane2_GCCAAT_HPNE-10xBS_p014.status
```

```
==> ./sanchari/j432/bismark_aligned/qscripts/J432_AHHH5NBCXX_Lane2_GCCAAT_HPNE-
```

```
10xBS_p005.sh <==
#!/bin/bash
#$ -cwd
#$ -N bismark_alignment
#$ -j n
#$ -l h_vmem=5.8G
#$ -pe smp 5
#$ -S /bin/bash
#$ -m e
#$ -M kith.pradhan@einstein.yu.edu

module load bismark/0.14.5
module load bowtie2/2.2.3/gcc.4.4.7
module load samtools/1.2/gcc.4.4.7
module load picard-tools/1.92/java.1.8.0_20

SNAME=J432_AHHH5NBCXX_Lane2_GCCAAT_HPNE-10xBS_p005
FQ1=./trimmed/split/J432_AHHH5NBCXX_Lane2_GCCAAT_HPNE-10xBS.1_val_1.fq.p005
FQ2=./trimmed/split/J432_AHHH5NBCXX_Lane2_GCCAAT_HPNE-10xBS.2_val_2.fq.p005
REF=/home/kpradha1/projects/hg19/
bismark --multicore 1 --bowtie2 -p 4 /home/kpradha1/projects/hg19/ -1
./trimmed/split/J432_AHHH5NBCXX_Lane2_GCCAAT_HPNE-10xBS.1_val_1.fq.p005 -2
./trimmed/split/J432_AHHH5NBCXX_Lane2_GCCAAT_HPNE-10xBS.2_val_2.fq.p005
java -jar $(which SortSam.jar) INPUT=J432_AHHH5NBCXX_Lane2_GCCAAT_HPNE-
10xBS.1_val_1.fq.p005_bismark_bt2_pe.bam OUTPUT=J432_AHHH5NBCXX_Lane2_GCCAAT_HPNE-
10xBS_p005_sorted.bam SO=coordinate CREATE_INDEX=true
echo "done" > J432_AHHH5NBCXX_Lane2_GCCAAT_HPNE-10xBS_p005.status

==> ./sanchari/j432/bismark_aligned/qscripts/J432_AHHH5NBCXX_Lane2_GCCAAT_HPNE-
10xBS_p006.sh <==
#!/bin/bash
#$ -cwd
#$ -N bismark_alignment
#$ -j n
#$ -l h_vmem=5.8G
#$ -pe smp 5
#$ -S /bin/bash
#$ -m e
#$ -M kith.pradhan@einstein.yu.edu

module load bismark/0.14.5
module load bowtie2/2.2.3/gcc.4.4.7
module load samtools/1.2/gcc.4.4.7
module load picard-tools/1.92/java.1.8.0_20

SNAME=J432_AHHH5NBCXX_Lane2_GCCAAT_HPNE-10xBS_p006
FQ1=./trimmed/split/J432_AHHH5NBCXX_Lane2_GCCAAT_HPNE-10xBS.1_val_1.fq.p006
FQ2=./trimmed/split/J432_AHHH5NBCXX_Lane2_GCCAAT_HPNE-10xBS.2_val_2.fq.p006
REF=/home/kpradha1/projects/hg19/
bismark --multicore 1 --bowtie2 -p 4 /home/kpradha1/projects/hg19/ -1
./trimmed/split/J432_AHHH5NBCXX_Lane2_GCCAAT_HPNE-10xBS.1_val_1.fq.p006 -2
./trimmed/split/J432_AHHH5NBCXX_Lane2_GCCAAT_HPNE-10xBS.2_val_2.fq.p006
java -jar $(which SortSam.jar) INPUT=J432_AHHH5NBCXX_Lane2_GCCAAT_HPNE-
10xBS.1_val_1.fq.p006_bismark_bt2_pe.bam OUTPUT=J432_AHHH5NBCXX_Lane2_GCCAAT_HPNE-
10xBS_p006_sorted.bam SO=coordinate CREATE_INDEX=true
echo "done" > J432_AHHH5NBCXX_Lane2_GCCAAT_HPNE-10xBS_p006.status

==> ./sanchari/j432/bismark_aligned/qscripts/J432_AHHH5NBCXX_Lane2_GCCAAT_HPNE-
10xBS_p011.sh <==
```

```

#!/bin/bash
#$ -cwd
#$ -N bismark_alignment
#$ -j n
#$ -l h_vmem=5.8G
#$ -pe smp 5
#$ -S /bin/bash
#$ -m e
#$ -M kith.pradhan@einstein.yu.edu

module load bismark/0.14.5
module load bowtie2/2.2.3/gcc.4.4.7
module load samtools/1.2/gcc.4.4.7
module load picard-tools/1.92/java.1.8.0_20

SNAME=J432_AHHH5NBCXX_Lane2_GCCAAT_HPNE-10xBS_p011
FQ1=../trimmed/split/J432_AHHH5NBCXX_Lane2_GCCAAT_HPNE-10xBS.1_val_1.fq.p011
FQ2=../trimmed/split/J432_AHHH5NBCXX_Lane2_GCCAAT_HPNE-10xBS.2_val_2.fq.p011
REF=/home/kpradha1/projects/hg19/
bismark --multicore 1 --bowtie2 -p 4 /home/kpradha1/projects/hg19/ -1
../trimmed/split/J432_AHHH5NBCXX_Lane2_GCCAAT_HPNE-10xBS.1_val_1.fq.p011 -2
../trimmed/split/J432_AHHH5NBCXX_Lane2_GCCAAT_HPNE-10xBS.2_val_2.fq.p011
java -jar $(which SortSam.jar) INPUT=J432_AHHH5NBCXX_Lane2_GCCAAT_HPNE-
10xBS.1_val_1.fq.p011_bismark_bt2_pe.bam OUTPUT=J432_AHHH5NBCXX_Lane2_GCCAAT_HPNE-
10xBS_p011_sorted.bam SO=coordinate CREATE_INDEX=true
echo "done" > J432_AHHH5NBCXX_Lane2_GCCAAT_HPNE-10xBS_p011.status

==> ./sanchari/j432/bismark_aligned/qscripts/J432_BHKVCGBCXX_Lane1_CTTGTA_JD-
BS_p003.sh <==
#!/bin/bash
#$ -cwd
#$ -N bismark_alignment
#$ -j n
#$ -l h_vmem=5.8G
#$ -pe smp 5
#$ -S /bin/bash
#$ -m e
#$ -M kith.pradhan@einstein.yu.edu

module load bismark/0.14.5
module load bowtie2/2.2.3/gcc.4.4.7
module load samtools/1.2/gcc.4.4.7
module load picard-tools/1.92/java.1.8.0_20

SNAME=J432_BHKVCGBCXX_Lane1_CTTGTA_JD-BS_p003
FQ1=../trimmed/split/J432_BHKVCGBCXX_Lane1_CTTGTA_JD-BS.1_val_1.fq.p003
FQ2=../trimmed/split/J432_BHKVCGBCXX_Lane1_CTTGTA_JD-BS.2_val_2.fq.p003
REF=/home/kpradha1/projects/hg19/
bismark --multicore 1 --bowtie2 -p 4 /home/kpradha1/projects/hg19/ -1
../trimmed/split/J432_BHKVCGBCXX_Lane1_CTTGTA_JD-BS.1_val_1.fq.p003 -2
../trimmed/split/J432_BHKVCGBCXX_Lane1_CTTGTA_JD-BS.2_val_2.fq.p003
java -jar $(which SortSam.jar) INPUT=J432_BHKVCGBCXX_Lane1_CTTGTA_JD-
BS.1_val_1.fq.p003_bismark_bt2_pe.bam OUTPUT=J432_BHKVCGBCXX_Lane1_CTTGTA_JD-
BS_p003_sorted.bam SO=coordinate CREATE_INDEX=true
echo "done" > J432_BHKVCGBCXX_Lane1_CTTGTA_JD-BS_p003.status

==> ./sanchari/j432/bismark_aligned/qscripts/J432_BHKVCGBCXX_Lane2_GTGAAA_JD-
0xBS_p001.sh <==
#!/bin/bash

```

```
#$ -cwd
#$ -N bismark_alignment
#$ -j n
#$ -l h_vmem=5.8G
#$ -pe smp 5
#$ -S /bin/bash
#$ -m e
#$ -M kith.pradhan@einstein.yu.edu

module load bismark/0.14.5
module load bowtie2/2.2.3/gcc.4.4.7
module load samtools/1.2/gcc.4.4.7
module load picard-tools/1.92/java.1.8.0_20

SNAME=J432_BHKVCGBCXX_Lane2_GTGAAA_JD-OxBS_p001
FQ1=./trimmed/split/J432_BHKVCGBCXX_Lane2_GTGAAA_JD-OxBS.1_val_1.fq.p001
FQ2=./trimmed/split/J432_BHKVCGBCXX_Lane2_GTGAAA_JD-OxBS.2_val_2.fq.p001
REF=/home/kpradha1/projects/hg19/
bismark --multicore 1 --bowtie2 -p 4 /home/kpradha1/projects/hg19/ -1
./trimmed/split/J432_BHKVCGBCXX_Lane2_GTGAAA_JD-OxBS.1_val_1.fq.p001 -2
./trimmed/split/J432_BHKVCGBCXX_Lane2_GTGAAA_JD-OxBS.2_val_2.fq.p001
java -jar $(which SortSam.jar) INPUT=J432_BHKVCGBCXX_Lane2_GTGAAA_JD-
OxBS.1_val_1.fq.p001_bismark_bt2_pe.bam OUTPUT=J432_BHKVCGBCXX_Lane2_GTGAAA_JD-
OxBS_p001_sorted.bam SO=coordinate CREATE_INDEX=true
echo "done" > J432_BHKVCGBCXX_Lane2_GTGAAA_JD-OxBS_p001.status

==> ./sanchari/j432/bismark_aligned/qscripts/J432_BHKVCGBCXX_Lane2_GTGAAA_JD-
OxBS_p005.sh <==
#!/bin/bash
#$ -cwd
#$ -N bismark_alignment
#$ -j n
#$ -l h_vmem=5.8G
#$ -pe smp 5
#$ -S /bin/bash
#$ -m e
#$ -M kith.pradhan@einstein.yu.edu

module load bismark/0.14.5
module load bowtie2/2.2.3/gcc.4.4.7
module load samtools/1.2/gcc.4.4.7
module load picard-tools/1.92/java.1.8.0_20

SNAME=J432_BHKVCGBCXX_Lane2_GTGAAA_JD-OxBS_p005
FQ1=./trimmed/split/J432_BHKVCGBCXX_Lane2_GTGAAA_JD-OxBS.1_val_1.fq.p005
FQ2=./trimmed/split/J432_BHKVCGBCXX_Lane2_GTGAAA_JD-OxBS.2_val_2.fq.p005
REF=/home/kpradha1/projects/hg19/
bismark --multicore 1 --bowtie2 -p 4 /home/kpradha1/projects/hg19/ -1
./trimmed/split/J432_BHKVCGBCXX_Lane2_GTGAAA_JD-OxBS.1_val_1.fq.p005 -2
./trimmed/split/J432_BHKVCGBCXX_Lane2_GTGAAA_JD-OxBS.2_val_2.fq.p005
java -jar $(which SortSam.jar) INPUT=J432_BHKVCGBCXX_Lane2_GTGAAA_JD-
OxBS.1_val_1.fq.p005_bismark_bt2_pe.bam OUTPUT=J432_BHKVCGBCXX_Lane2_GTGAAA_JD-
OxBS_p005_sorted.bam SO=coordinate CREATE_INDEX=true
echo "done" > J432_BHKVCGBCXX_Lane2_GTGAAA_JD-OxBS_p005.status

==> ./sanchari/j432/bismark_aligned/qscripts/J432_AHHH5NBCXX_Lane2_GCCAAT_HPNE-
10xBS_p007.sh <==
#!/bin/bash
#$ -cwd
```



```

#$ -N bismark_alignment
#$ -j n
#$ -l h_vmem=5.8G
#$ -pe smp 5
#$ -S /bin/bash
#$ -m e
#$ -M kith.pradhan@einstein.yu.edu

module load bismark/0.14.5
module load bowtie2/2.2.3/gcc.4.4.7
module load samtools/1.2/gcc.4.4.7
module load picard-tools/1.92/java.1.8.0_20

SNAME=J432_AHHH5NBCXX_Lane2_GCCAAT_HPNE-10xBS_p007
FQ1=./trimmed/split/J432_AHHH5NBCXX_Lane2_GCCAAT_HPNE-10xBS.1_val_1.fq.p007
FQ2=./trimmed/split/J432_AHHH5NBCXX_Lane2_GCCAAT_HPNE-10xBS.2_val_2.fq.p007
REF=/home/kpradha1/projects/hg19/
bismark --multicore 1 --bowtie2 -p 4 /home/kpradha1/projects/hg19/ -1
./trimmed/split/J432_AHHH5NBCXX_Lane2_GCCAAT_HPNE-10xBS.1_val_1.fq.p007 -2
./trimmed/split/J432_AHHH5NBCXX_Lane2_GCCAAT_HPNE-10xBS.2_val_2.fq.p007
java -jar $(which SortSam.jar) INPUT=J432_AHHH5NBCXX_Lane2_GCCAAT_HPNE-
10xBS.1_val_1.fq.p007_bismark_bt2_pe.bam OUTPUT=J432_AHHH5NBCXX_Lane2_GCCAAT_HPNE-
10xBS_p007_sorted.bam SO=coordinate CREATE_INDEX=true
echo "done" > J432_AHHH5NBCXX_Lane2_GCCAAT_HPNE-10xBS_p007.status

==> ./sanchari/j432/bismark_aligned/qscripts/J432_BHKVCGBCXX_Lane2_GTGAAA_JD-
0xBS_p004.sh <==
#!/bin/bash
#$ -cwd
#$ -N bismark_alignment
#$ -j n
#$ -l h_vmem=5.8G
#$ -pe smp 5
#$ -S /bin/bash
#$ -m e
#$ -M kith.pradhan@einstein.yu.edu

module load bismark/0.14.5
module load bowtie2/2.2.3/gcc.4.4.7
module load samtools/1.2/gcc.4.4.7
module load picard-tools/1.92/java.1.8.0_20

SNAME=J432_BHKVCGBCXX_Lane2_GTGAAA_JD-0xBS_p004
FQ1=./trimmed/split/J432_BHKVCGBCXX_Lane2_GTGAAA_JD-0xBS.1_val_1.fq.p004
FQ2=./trimmed/split/J432_BHKVCGBCXX_Lane2_GTGAAA_JD-0xBS.2_val_2.fq.p004
REF=/home/kpradha1/projects/hg19/
bismark --multicore 1 --bowtie2 -p 4 /home/kpradha1/projects/hg19/ -1
./trimmed/split/J432_BHKVCGBCXX_Lane2_GTGAAA_JD-0xBS.1_val_1.fq.p004 -2
./trimmed/split/J432_BHKVCGBCXX_Lane2_GTGAAA_JD-0xBS.2_val_2.fq.p004
java -jar $(which SortSam.jar) INPUT=J432_BHKVCGBCXX_Lane2_GTGAAA_JD-
0xBS.1_val_1.fq.p004_bismark_bt2_pe.bam OUTPUT=J432_BHKVCGBCXX_Lane2_GTGAAA_JD-
0xBS_p004_sorted.bam SO=coordinate CREATE_INDEX=true
echo "done" > J432_BHKVCGBCXX_Lane2_GTGAAA_JD-0xBS_p004.status

==> ./sanchari/j432/bismark_aligned/qscripts/J432_BHKVCGBCXX_Lane2_GTGAAA_JD-
0xBS_p000.sh <==
#!/bin/bash
#$ -cwd
#$ -N bismark_alignment

```

```

#$ -j n
#$ -l h_vmem=5.8G
#$ -pe smp 5
#$ -S /bin/bash
#$ -m e
#$ -M kith.pradhan@einstein.yu.edu

module load bismark/0.14.5
module load bowtie2/2.2.3/gcc.4.4.7
module load samtools/1.2/gcc.4.4.7
module load picard-tools/1.92/java.1.8.0_20

SNAME=J432_BHKVCGBCXX_Lane2_GTGAAA_JD-0xBS_p000
FQ1=./trimmed/split/J432_BHKVCGBCXX_Lane2_GTGAAA_JD-0xBS.1_val_1.fq.p000
FQ2=./trimmed/split/J432_BHKVCGBCXX_Lane2_GTGAAA_JD-0xBS.2_val_2.fq.p000
REF=/home/kpradha1/projects/hg19/
bismark --multicore 1 --bowtie2 -p 4 /home/kpradha1/projects/hg19/ -1
./trimmed/split/J432_BHKVCGBCXX_Lane2_GTGAAA_JD-0xBS.1_val_1.fq.p000 -2
./trimmed/split/J432_BHKVCGBCXX_Lane2_GTGAAA_JD-0xBS.2_val_2.fq.p000
java -jar $(which SortSam.jar) INPUT=J432_BHKVCGBCXX_Lane2_GTGAAA_JD-
0xBS.1_val_1.fq.p000_bismark_bt2_pe.bam OUTPUT=J432_BHKVCGBCXX_Lane2_GTGAAA_JD-
0xBS_p000_sorted.bam SO=coordinate CREATE_INDEX=true
echo "done" > J432_BHKVCGBCXX_Lane2_GTGAAA_JD-0xBS_p000.status

==> ./sanchari/j432/bismark_aligned/qscripts/J432_AHHH5NBCXX_Lane1_ACAGTG_HPNE-
1_BS_p004.sh <==
#!/bin/bash
#$ -cwd
#$ -N bismark_alignment
#$ -j n
#$ -l h_vmem=5.8G
#$ -pe smp 5
#$ -S /bin/bash
#$ -m e
#$ -M kith.pradhan@einstein.yu.edu

module load bismark/0.14.5
module load bowtie2/2.2.3/gcc.4.4.7
module load samtools/1.2/gcc.4.4.7
module load picard-tools/1.92/java.1.8.0_20

SNAME=J432_AHHH5NBCXX_Lane1_ACAGTG_HPNE-1_BS_p004
FQ1=./trimmed/split/J432_AHHH5NBCXX_Lane1_ACAGTG_HPNE-1_BS.1_val_1.fq.p004
FQ2=./trimmed/split/J432_AHHH5NBCXX_Lane1_ACAGTG_HPNE-1_BS.2_val_2.fq.p004
REF=/home/kpradha1/projects/hg19/
bismark --multicore 1 --bowtie2 -p 4 /home/kpradha1/projects/hg19/ -1
./trimmed/split/J432_AHHH5NBCXX_Lane1_ACAGTG_HPNE-1_BS.1_val_1.fq.p004 -2
./trimmed/split/J432_AHHH5NBCXX_Lane1_ACAGTG_HPNE-1_BS.2_val_2.fq.p004
java -jar $(which SortSam.jar) INPUT=J432_AHHH5NBCXX_Lane1_ACAGTG_HPNE-
1_BS.1_val_1.fq.p004_bismark_bt2_pe.bam OUTPUT=J432_AHHH5NBCXX_Lane1_ACAGTG_HPNE-
1_BS_p004_sorted.bam SO=coordinate CREATE_INDEX=true
echo "done" > J432_AHHH5NBCXX_Lane1_ACAGTG_HPNE-1_BS_p004.status

==> ./sanchari/j432/bismark_aligned/qscripts/J432_AHHH5NBCXX_Lane2_GCCAAT_HPNE-
10xBS_p003.sh <==
#!/bin/bash
#$ -cwd
#$ -N bismark_alignment
#$ -j n

```

```

#$ -l h_vmem=5.8G
#$ -pe smp 5
#$ -S /bin/bash
#$ -m e
#$ -M kith.pradhan@einstein.yu.edu

module load bismark/0.14.5
module load bowtie2/2.2.3/gcc.4.4.7
module load samtools/1.2/gcc.4.4.7
module load picard-tools/1.92/java.1.8.0_20

SNAME=J432_AHHH5NBCXX_Lane2_GCCAAT_HPNE-10xBS_p003
FQ1=./trimmed/split/J432_AHHH5NBCXX_Lane2_GCCAAT_HPNE-10xBS.1_val_1.fq.p003
FQ2=./trimmed/split/J432_AHHH5NBCXX_Lane2_GCCAAT_HPNE-10xBS.2_val_2.fq.p003
REF=/home/kpradha1/projects/hg19/
bismark --multicore 1 --bowtie2 -p 4 /home/kpradha1/projects/hg19/ -1
./trimmed/split/J432_AHHH5NBCXX_Lane2_GCCAAT_HPNE-10xBS.1_val_1.fq.p003 -2
./trimmed/split/J432_AHHH5NBCXX_Lane2_GCCAAT_HPNE-10xBS.2_val_2.fq.p003
java -jar $(which SortSam.jar) INPUT=J432_AHHH5NBCXX_Lane2_GCCAAT_HPNE-
10xBS.1_val_1.fq.p003_bismark_bt2_pe.bam OUTPUT=J432_AHHH5NBCXX_Lane2_GCCAAT_HPNE-
10xBS_p003_sorted.bam SO=coordinate CREATE_INDEX=true
echo "done" > J432_AHHH5NBCXX_Lane2_GCCAAT_HPNE-10xBS_p003.status

==> ./sanchari/j432/bismark_aligned/qscripts/J432_BHKVCGBCXX_Lane1_CTTGTA_JD-
BS_p010.sh <==
#!/bin/bash
#$ -cwd
#$ -N bismark_alignment
#$ -j n
#$ -l h_vmem=5.8G
#$ -pe smp 5
#$ -S /bin/bash
#$ -m e
#$ -M kith.pradhan@einstein.yu.edu

module load bismark/0.14.5
module load bowtie2/2.2.3/gcc.4.4.7
module load samtools/1.2/gcc.4.4.7
module load picard-tools/1.92/java.1.8.0_20

SNAME=J432_BHKVCGBCXX_Lane1_CTTGTA_JD-BS_p010
FQ1=./trimmed/split/J432_BHKVCGBCXX_Lane1_CTTGTA_JD-BS.1_val_1.fq.p010
FQ2=./trimmed/split/J432_BHKVCGBCXX_Lane1_CTTGTA_JD-BS.2_val_2.fq.p010
REF=/home/kpradha1/projects/hg19/
bismark --multicore 1 --bowtie2 -p 4 /home/kpradha1/projects/hg19/ -1
./trimmed/split/J432_BHKVCGBCXX_Lane1_CTTGTA_JD-BS.1_val_1.fq.p010 -2
./trimmed/split/J432_BHKVCGBCXX_Lane1_CTTGTA_JD-BS.2_val_2.fq.p010
java -jar $(which SortSam.jar) INPUT=J432_BHKVCGBCXX_Lane1_CTTGTA_JD-
BS.1_val_1.fq.p010_bismark_bt2_pe.bam OUTPUT=J432_BHKVCGBCXX_Lane1_CTTGTA_JD-
BS_p010_sorted.bam SO=coordinate CREATE_INDEX=true
echo "done" > J432_BHKVCGBCXX_Lane1_CTTGTA_JD-BS_p010.status

==> ./sanchari/j432/bismark_aligned/qscripts/J432_BHKVCGBCXX_Lane1_CTTGTA_JD-
BS_p004.sh <==
#!/bin/bash
#$ -cwd
#$ -N bismark_alignment
#$ -j n
#$ -l h_vmem=5.8G

```

```
#$ -pe smp 5
#$ -S /bin/bash
#$ -m e
#$ -M kith.pradhan@einstein.yu.edu
```

```
module load bismark/0.14.5
module load bowtie2/2.2.3/gcc.4.4.7
module load samtools/1.2/gcc.4.4.7
module load picard-tools/1.92/java.1.8.0_20
```

```
SNAME=J432_BHKVCGBCXX_Lane1_CTTGTA_JD-BS_p004
FQ1=./trimmed/split/J432_BHKVCGBCXX_Lane1_CTTGTA_JD-BS.1_val_1.fq.p004
FQ2=./trimmed/split/J432_BHKVCGBCXX_Lane1_CTTGTA_JD-BS.2_val_2.fq.p004
REF=/home/kpradha1/projects/hg19/
bismark --multicore 1 --bowtie2 -p 4 /home/kpradha1/projects/hg19/ -1
./trimmed/split/J432_BHKVCGBCXX_Lane1_CTTGTA_JD-BS.1_val_1.fq.p004 -2
./trimmed/split/J432_BHKVCGBCXX_Lane1_CTTGTA_JD-BS.2_val_2.fq.p004
java -jar $(which SortSam.jar) INPUT=J432_BHKVCGBCXX_Lane1_CTTGTA_JD-
BS.1_val_1.fq.p004_bismark_bt2_pe.bam OUTPUT=J432_BHKVCGBCXX_Lane1_CTTGTA_JD-
BS_p004_sorted.bam SO=coordinate CREATE_INDEX=true
echo "done" > J432_BHKVCGBCXX_Lane1_CTTGTA_JD-BS_p004.status
```

```
==> ./sanchari/j432/bismark_aligned/qscripts/J432_AHHH5NBCXX_Lane1_ACAGTG_HPNE-
1_BS_p001.sh <==
#!/bin/bash
#$ -cwd
#$ -N bismark_alignment
#$ -j n
#$ -l h_vmem=5.8G
#$ -pe smp 5
#$ -S /bin/bash
#$ -m e
#$ -M kith.pradhan@einstein.yu.edu
```

```
module load bismark/0.14.5
module load bowtie2/2.2.3/gcc.4.4.7
module load samtools/1.2/gcc.4.4.7
module load picard-tools/1.92/java.1.8.0_20
```

```
SNAME=J432_AHHH5NBCXX_Lane1_ACAGTG_HPNE-1_BS_p001
FQ1=./trimmed/split/J432_AHHH5NBCXX_Lane1_ACAGTG_HPNE-1_BS.1_val_1.fq.p001
FQ2=./trimmed/split/J432_AHHH5NBCXX_Lane1_ACAGTG_HPNE-1_BS.2_val_2.fq.p001
REF=/home/kpradha1/projects/hg19/
bismark --multicore 1 --bowtie2 -p 4 /home/kpradha1/projects/hg19/ -1
./trimmed/split/J432_AHHH5NBCXX_Lane1_ACAGTG_HPNE-1_BS.1_val_1.fq.p001 -2
./trimmed/split/J432_AHHH5NBCXX_Lane1_ACAGTG_HPNE-1_BS.2_val_2.fq.p001
java -jar $(which SortSam.jar) INPUT=J432_AHHH5NBCXX_Lane1_ACAGTG_HPNE-
1_BS.1_val_1.fq.p001_bismark_bt2_pe.bam OUTPUT=J432_AHHH5NBCXX_Lane1_ACAGTG_HPNE-
1_BS_p001_sorted.bam SO=coordinate CREATE_INDEX=true
echo "done" > J432_AHHH5NBCXX_Lane1_ACAGTG_HPNE-1_BS_p001.status
```

```
==> ./sanchari/j432/bismark_aligned/qscripts/J432_AHHH5NBCXX_Lane1_ACAGTG_HPNE-
1_BS_p011.sh <==
#!/bin/bash
#$ -cwd
#$ -N bismark_alignment
#$ -j n
#$ -l h_vmem=5.8G
#$ -pe smp 5
```

```
##$ -S /bin/bash
##$ -m e
##$ -M kith.pradhan@einstein.yu.edu

module load bismark/0.14.5
module load bowtie2/2.2.3/gcc.4.4.7
module load samtools/1.2/gcc.4.4.7
module load picard-tools/1.92/java.1.8.0_20

SNAME=J432_AHHH5NBCXX_Lane1_ACAGTG_HPNE-1_BS_p011
FQ1=./trimmed/split/J432_AHHH5NBCXX_Lane1_ACAGTG_HPNE-1_BS.1_val_1.fq.p011
FQ2=./trimmed/split/J432_AHHH5NBCXX_Lane1_ACAGTG_HPNE-1_BS.2_val_2.fq.p011
REF=/home/kpradha1/projects/hg19/
bismark --multicore 1 --bowtie2 -p 4 /home/kpradha1/projects/hg19/ -1
./trimmed/split/J432_AHHH5NBCXX_Lane1_ACAGTG_HPNE-1_BS.1_val_1.fq.p011 -2
./trimmed/split/J432_AHHH5NBCXX_Lane1_ACAGTG_HPNE-1_BS.2_val_2.fq.p011
java -jar $(which SortSam.jar) INPUT=J432_AHHH5NBCXX_Lane1_ACAGTG_HPNE-
1_BS.1_val_1.fq.p011_bismark_bt2_pe.bam OUTPUT=J432_AHHH5NBCXX_Lane1_ACAGTG_HPNE-
1_BS_p011_sorted.bam SO=coordinate CREATE_INDEX=true
echo "done" > J432_AHHH5NBCXX_Lane1_ACAGTG_HPNE-1_BS_p011.status

==> ./sanchari/j432/bismark_aligned/qscripts/J432_BHKVCGBCXX_Lane2_GTGAAA_JD-
0xBS_p007.sh <==
#!/bin/bash
##$ -cwd
##$ -N bismark_alignment
##$ -j n
##$ -l h_vmem=5.8G
##$ -pe smp 5
##$ -S /bin/bash
##$ -m e
##$ -M kith.pradhan@einstein.yu.edu

module load bismark/0.14.5
module load bowtie2/2.2.3/gcc.4.4.7
module load samtools/1.2/gcc.4.4.7
module load picard-tools/1.92/java.1.8.0_20

SNAME=J432_BHKVCGBCXX_Lane2_GTGAAA_JD-0xBS_p007
FQ1=./trimmed/split/J432_BHKVCGBCXX_Lane2_GTGAAA_JD-0xBS.1_val_1.fq.p007
FQ2=./trimmed/split/J432_BHKVCGBCXX_Lane2_GTGAAA_JD-0xBS.2_val_2.fq.p007
REF=/home/kpradha1/projects/hg19/
bismark --multicore 1 --bowtie2 -p 4 /home/kpradha1/projects/hg19/ -1
./trimmed/split/J432_BHKVCGBCXX_Lane2_GTGAAA_JD-0xBS.1_val_1.fq.p007 -2
./trimmed/split/J432_BHKVCGBCXX_Lane2_GTGAAA_JD-0xBS.2_val_2.fq.p007
java -jar $(which SortSam.jar) INPUT=J432_BHKVCGBCXX_Lane2_GTGAAA_JD-
0xBS.1_val_1.fq.p007_bismark_bt2_pe.bam OUTPUT=J432_BHKVCGBCXX_Lane2_GTGAAA_JD-
0xBS_p007_sorted.bam SO=coordinate CREATE_INDEX=true
echo "done" > J432_BHKVCGBCXX_Lane2_GTGAAA_JD-0xBS_p007.status

==> ./sanchari/j432/bismark_aligned/qscripts/J432_AHHH5NBCXX_Lane1_ACAGTG_HPNE-
1_BS_p007.sh <==
#!/bin/bash
##$ -cwd
##$ -N bismark_alignment
##$ -j n
##$ -l h_vmem=5.8G
##$ -pe smp 5
##$ -S /bin/bash
```

```
#$ -m e
#$ -M kith.pradhan@einstein.yu.edu

module load bismark/0.14.5
module load bowtie2/2.2.3/gcc.4.4.7
module load samtools/1.2/gcc.4.4.7
module load picard-tools/1.92/java.1.8.0_20

SNAME=J432_AHHH5NBCXX_Lane1_ACAGTG_HPNE-1_BS_p007
FQ1=./trimmed/split/J432_AHHH5NBCXX_Lane1_ACAGTG_HPNE-1_BS.1_val_1.fq.p007
FQ2=./trimmed/split/J432_AHHH5NBCXX_Lane1_ACAGTG_HPNE-1_BS.2_val_2.fq.p007
REF=/home/kpradha1/projects/hg19/
bismark --multicore 1 --bowtie2 -p 4 /home/kpradha1/projects/hg19/ -1
./trimmed/split/J432_AHHH5NBCXX_Lane1_ACAGTG_HPNE-1_BS.1_val_1.fq.p007 -2
./trimmed/split/J432_AHHH5NBCXX_Lane1_ACAGTG_HPNE-1_BS.2_val_2.fq.p007
java -jar $(which SortSam.jar) INPUT=J432_AHHH5NBCXX_Lane1_ACAGTG_HPNE-
1_BS.1_val_1.fq.p007_bismark_bt2_pe.bam OUTPUT=J432_AHHH5NBCXX_Lane1_ACAGTG_HPNE-
1_BS_p007_sorted.bam SO=coordinate CREATE_INDEX=true
echo "done" > J432_AHHH5NBCXX_Lane1_ACAGTG_HPNE-1_BS_p007.status

==> ./sanchari/j432/bismark_aligned/qscripts/J432_BHKVCGBCXX_Lane2_GTGAAA_JD-
0xBS_p002.sh <==
#!/bin/bash
#$ -cwd
#$ -N bismark_alignment
#$ -j n
#$ -l h_vmem=5.8G
#$ -pe smp 5
#$ -S /bin/bash
#$ -m e
#$ -M kith.pradhan@einstein.yu.edu

module load bismark/0.14.5
module load bowtie2/2.2.3/gcc.4.4.7
module load samtools/1.2/gcc.4.4.7
module load picard-tools/1.92/java.1.8.0_20

SNAME=J432_BHKVCGBCXX_Lane2_GTGAAA_JD-0xBS_p002
FQ1=./trimmed/split/J432_BHKVCGBCXX_Lane2_GTGAAA_JD-0xBS.1_val_1.fq.p002
FQ2=./trimmed/split/J432_BHKVCGBCXX_Lane2_GTGAAA_JD-0xBS.2_val_2.fq.p002
REF=/home/kpradha1/projects/hg19/
bismark --multicore 1 --bowtie2 -p 4 /home/kpradha1/projects/hg19/ -1
./trimmed/split/J432_BHKVCGBCXX_Lane2_GTGAAA_JD-0xBS.1_val_1.fq.p002 -2
./trimmed/split/J432_BHKVCGBCXX_Lane2_GTGAAA_JD-0xBS.2_val_2.fq.p002
java -jar $(which SortSam.jar) INPUT=J432_BHKVCGBCXX_Lane2_GTGAAA_JD-
0xBS.1_val_1.fq.p002_bismark_bt2_pe.bam OUTPUT=J432_BHKVCGBCXX_Lane2_GTGAAA_JD-
0xBS_p002_sorted.bam SO=coordinate CREATE_INDEX=true
echo "done" > J432_BHKVCGBCXX_Lane2_GTGAAA_JD-0xBS_p002.status

==> ./sanchari/j432/bismark_aligned/qscripts/J432_BHKVCGBCXX_Lane2_GTGAAA_JD-
0xBS_p008.sh <==
#!/bin/bash
#$ -cwd
#$ -N bismark_alignment
#$ -j n
#$ -l h_vmem=5.8G
#$ -pe smp 5
#$ -S /bin/bash
#$ -m e
```

```
#$ -M kith.pradhan@einstein.yu.edu
```

```
module load bismark/0.14.5  
module load bowtie2/2.2.3/gcc.4.4.7  
module load samtools/1.2/gcc.4.4.7  
module load picard-tools/1.92/java.1.8.0_20
```

```
SNAME=J432_BHKVCGBCXX_Lane2_GTGAAA_JD-OxBS_p008  
FQ1=./trimmed/split/J432_BHKVCGBCXX_Lane2_GTGAAA_JD-OxBS.1_val_1.fq.p008  
FQ2=./trimmed/split/J432_BHKVCGBCXX_Lane2_GTGAAA_JD-OxBS.2_val_2.fq.p008  
REF=/home/kpradha1/projects/hg19/  
bismark --multicore 1 --bowtie2 -p 4 /home/kpradha1/projects/hg19/ -1  
./trimmed/split/J432_BHKVCGBCXX_Lane2_GTGAAA_JD-OxBS.1_val_1.fq.p008 -2  
./trimmed/split/J432_BHKVCGBCXX_Lane2_GTGAAA_JD-OxBS.2_val_2.fq.p008  
java -jar $(which SortSam.jar) INPUT=J432_BHKVCGBCXX_Lane2_GTGAAA_JD-  
OxBS.1_val_1.fq.p008_bismark_bt2_pe.bam OUTPUT=J432_BHKVCGBCXX_Lane2_GTGAAA_JD-  
OxBS_p008_sorted.bam SO=coordinate CREATE_INDEX=true  
echo "done" > J432_BHKVCGBCXX_Lane2_GTGAAA_JD-OxBS_p008.status
```

```
==> ./sanchari/j432/bismark_aligned/qscripts/J432_BHKVCGBCXX_Lane2_GTGAAA_JD-  
OxBS_p009.sh <==
```

```
#!/bin/bash  
#$ -cwd  
#$ -N bismark_alignment  
#$ -j n  
#$ -l h_vmem=5.8G  
#$ -pe smp 5  
#$ -S /bin/bash  
#$ -m e  
#$ -M kith.pradhan@einstein.yu.edu
```

```
module load bismark/0.14.5  
module load bowtie2/2.2.3/gcc.4.4.7  
module load samtools/1.2/gcc.4.4.7  
module load picard-tools/1.92/java.1.8.0_20
```

```
SNAME=J432_BHKVCGBCXX_Lane2_GTGAAA_JD-OxBS_p009  
FQ1=./trimmed/split/J432_BHKVCGBCXX_Lane2_GTGAAA_JD-OxBS.1_val_1.fq.p009  
FQ2=./trimmed/split/J432_BHKVCGBCXX_Lane2_GTGAAA_JD-OxBS.2_val_2.fq.p009  
REF=/home/kpradha1/projects/hg19/  
bismark --multicore 1 --bowtie2 -p 4 /home/kpradha1/projects/hg19/ -1  
./trimmed/split/J432_BHKVCGBCXX_Lane2_GTGAAA_JD-OxBS.1_val_1.fq.p009 -2  
./trimmed/split/J432_BHKVCGBCXX_Lane2_GTGAAA_JD-OxBS.2_val_2.fq.p009  
java -jar $(which SortSam.jar) INPUT=J432_BHKVCGBCXX_Lane2_GTGAAA_JD-  
OxBS.1_val_1.fq.p009_bismark_bt2_pe.bam OUTPUT=J432_BHKVCGBCXX_Lane2_GTGAAA_JD-  
OxBS_p009_sorted.bam SO=coordinate CREATE_INDEX=true  
echo "done" > J432_BHKVCGBCXX_Lane2_GTGAAA_JD-OxBS_p009.status
```

```
==> ./sanchari/j432/bismark_aligned/qscripts/J432_AHHH5NBCXX_Lane2_GCCAAT_HPNE-  
10xBS_p004.sh <==
```

```
#!/bin/bash  
#$ -cwd  
#$ -N bismark_alignment  
#$ -j n  
#$ -l h_vmem=5.8G  
#$ -pe smp 5  
#$ -S /bin/bash  
#$ -m e  
#$ -M kith.pradhan@einstein.yu.edu
```

```
module load bismark/0.14.5
module load bowtie2/2.2.3/gcc.4.4.7
module load samtools/1.2/gcc.4.4.7
module load picard-tools/1.92/java.1.8.0_20
```

```
SNAME=J432_AHHH5NBCXX_Lane2_GCCAAT_HPNE-10xBS_p004
FQ1=../trimmed/split/J432_AHHH5NBCXX_Lane2_GCCAAT_HPNE-10xBS.1_val_1.fq.p004
FQ2=../trimmed/split/J432_AHHH5NBCXX_Lane2_GCCAAT_HPNE-10xBS.2_val_2.fq.p004
REF=/home/kpradha1/projects/hg19/
bismark --multicore 1 --bowtie2 -p 4 /home/kpradha1/projects/hg19/ -1
../trimmed/split/J432_AHHH5NBCXX_Lane2_GCCAAT_HPNE-10xBS.1_val_1.fq.p004 -2
../trimmed/split/J432_AHHH5NBCXX_Lane2_GCCAAT_HPNE-10xBS.2_val_2.fq.p004
java -jar $(which SortSam.jar) INPUT=J432_AHHH5NBCXX_Lane2_GCCAAT_HPNE-
10xBS.1_val_1.fq.p004_bismark_bt2_pe.bam OUTPUT=J432_AHHH5NBCXX_Lane2_GCCAAT_HPNE-
10xBS_p004_sorted.bam SO=coordinate CREATE_INDEX=true
echo "done" > J432_AHHH5NBCXX_Lane2_GCCAAT_HPNE-10xBS_p004.status
```

```
==> ./sanchari/j432/bismark_aligned/qscripts/J432_AHHH5NBCXX_Lane1_ACAGTG_HPNE-
1_BS_p003.sh <==
#!/bin/bash
#$ -cwd
#$ -N bismark_alignment
#$ -j n
#$ -l h_vmem=5.8G
#$ -pe smp 5
#$ -S /bin/bash
#$ -m e
#$ -M kith.pradhan@einstein.yu.edu
```

```
module load bismark/0.14.5
module load bowtie2/2.2.3/gcc.4.4.7
module load samtools/1.2/gcc.4.4.7
module load picard-tools/1.92/java.1.8.0_20
```

```
SNAME=J432_AHHH5NBCXX_Lane1_ACAGTG_HPNE-1_BS_p003
FQ1=../trimmed/split/J432_AHHH5NBCXX_Lane1_ACAGTG_HPNE-1_BS.1_val_1.fq.p003
FQ2=../trimmed/split/J432_AHHH5NBCXX_Lane1_ACAGTG_HPNE-1_BS.2_val_2.fq.p003
REF=/home/kpradha1/projects/hg19/
bismark --multicore 1 --bowtie2 -p 4 /home/kpradha1/projects/hg19/ -1
../trimmed/split/J432_AHHH5NBCXX_Lane1_ACAGTG_HPNE-1_BS.1_val_1.fq.p003 -2
../trimmed/split/J432_AHHH5NBCXX_Lane1_ACAGTG_HPNE-1_BS.2_val_2.fq.p003
java -jar $(which SortSam.jar) INPUT=J432_AHHH5NBCXX_Lane1_ACAGTG_HPNE-
1_BS.1_val_1.fq.p003_bismark_bt2_pe.bam OUTPUT=J432_AHHH5NBCXX_Lane1_ACAGTG_HPNE-
1_BS_p003_sorted.bam SO=coordinate CREATE_INDEX=true
echo "done" > J432_AHHH5NBCXX_Lane1_ACAGTG_HPNE-1_BS_p003.status
```

```
==> ./sanchari/j432/bismark_aligned/qscripts/J432_BHKVCGBCXX_Lane2_GTGAAA_JD-
0xBS_p015.sh <==
#!/bin/bash
#$ -cwd
#$ -N bismark_alignment
#$ -j n
#$ -l h_vmem=5.8G
#$ -pe smp 5
#$ -S /bin/bash
#$ -m e
#$ -M kith.pradhan@einstein.yu.edu
```



```
module load bismark/0.14.5
module load bowtie2/2.2.3/gcc.4.4.7
module load samtools/1.2/gcc.4.4.7
module load picard-tools/1.92/java.1.8.0_20
```

```
SNAME=J432_BHKVCGBCXX_Lane2_GTGAAA_JD-0xBS_p015
FQ1=./trimmed/split/J432_BHKVCGBCXX_Lane2_GTGAAA_JD-0xBS.1_val_1.fq.p015
FQ2=./trimmed/split/J432_BHKVCGBCXX_Lane2_GTGAAA_JD-0xBS.2_val_2.fq.p015
REF=/home/kpradha1/projects/hg19/
bismark --multicore 1 --bowtie2 -p 4 /home/kpradha1/projects/hg19/ -1
./trimmed/split/J432_BHKVCGBCXX_Lane2_GTGAAA_JD-0xBS.1_val_1.fq.p015 -2
./trimmed/split/J432_BHKVCGBCXX_Lane2_GTGAAA_JD-0xBS.2_val_2.fq.p015
java -jar $(which SortSam.jar) INPUT=J432_BHKVCGBCXX_Lane2_GTGAAA_JD-
0xBS.1_val_1.fq.p015_bismark_bt2_pe.bam OUTPUT=J432_BHKVCGBCXX_Lane2_GTGAAA_JD-
0xBS_p015_sorted.bam SO=coordinate CREATE_INDEX=true
echo "done" > J432_BHKVCGBCXX_Lane2_GTGAAA_JD-0xBS_p015.status
```

```
==> ./sanchari/j432/bismark_aligned/submitClipOverlaps_mycomp.sh <==
#qsub clipOverlaps.sh J432_AHHH5NBCXX_Lane1_ACAGTG_HPNE-
1_BS_merged_sorted_mdup_nsorted.bam
#qsub clipOverlaps.sh J432_AHHH5NBCXX_Lane2_GCCAAT_HPNE-
10xBS_merged_sorted_mdup_nsorted.bam
#qsub clipOverlaps.sh J432_BHKVCGBCXX_Lane1_CTTGTA_JD-
BS_merged_sorted_mdup_nsorted.bam
#qsub clipOverlaps.sh J432_BHKVCGBCXX_Lane2_GTGAAA_JD-
0xBS_merged_sorted_mdup_nsorted.bam
```

```
./clipOverlaps_mycomp.sh J432_AHHH5NBCXX_Lane1_ACAGTG_HPNE-
1_BS_merged_sorted_mdup.bam
./clipOverlaps_mycomp.sh J432_AHHH5NBCXX_Lane2_GCCAAT_HPNE-
10xBS_merged_sorted_mdup.bam
./clipOverlaps_mycomp.sh J432_BHKVCGBCXX_Lane1_CTTGTA_JD-BS_merged_sorted_mdup.bam
./clipOverlaps_mycomp.sh J432_BHKVCGBCXX_Lane2_GTGAAA_JD-
0xBS_merged_sorted_mdup.bam
```

```
==> ./sanchari/j432/bismark_aligned/clipOverlaps_mycomp.sh <==
bam=$1
bname="${bam%. *}"
```

```
bam clipOverlap --in $bam --out ${bname}_clip.bam
samtools index ${bname}_clip.bam
```

```
==> ./sanchari/j432/bismark_aligned/submitMD.sh <==
qsub markDuplicates.sh J432_AHHH5NBCXX_Lane1_ACAGTG_HPNE-1_BS_merged_sorted.bam
qsub markDuplicates.sh J432_AHHH5NBCXX_Lane2_GCCAAT_HPNE-10xBS_merged_sorted.bam
qsub markDuplicates.sh J432_BHKVCGBCXX_Lane1_CTTGTA_JD-BS_merged_sorted.bam
qsub markDuplicates.sh J432_BHKVCGBCXX_Lane2_GTGAAA_JD-0xBS_merged_sorted.bam
```

```
==> ./sanchari/j432/bismark_aligned/submitMerges.sh <==
```

```
qsub mergeBams.sh J432_AHHH5NBCXX_Lane1_ACAGTG_HPNE-1_BS_merged_sorted.bam
J432_AHHH5NBCXX_Lane1_ACAGTG_HPNE-1_BS_p*_sorted.bam
qsub mergeBams.sh J432_AHHH5NBCXX_Lane2_GCCAAT_HPNE-10xBS_merged_sorted.bam
J432_AHHH5NBCXX_Lane2_GCCAAT_HPNE-10xBS_p*_sorted.bam
qsub mergeBams.sh J432_BHKVCGBCXX_Lane1_CTTGTA_JD-BS_merged_sorted.bam
J432_BHKVCGBCXX_Lane1_CTTGTA_JD-BS_p*_sorted.bam
qsub mergeBams.sh J432_BHKVCGBCXX_Lane2_GTGAAA_JD-0xBS_merged_sorted.bam
```

J432\_BHKVCGBCXX\_Lane2\_GTGAAA\_JD-0xBS\_p\*\_sorted.bam

```
==> ./sanchari/j432/bismark_aligned/mergeBams.sh <==
#!/bin/bash
#$ -cwd
#$ -j n
#$ -l h_vmem=4G
#$ -pe smp 4
#$ -S /bin/bash
#$ -m e
#$ -M kith.pradhan@einstein.yu.edu
#usage:
#qsub mergeBams.sh outfile.bam infile1.bam infile2.bam infile3.bam
#qsub mergeBams.sh hpne_bs.bam *hpne*bs*sorted*bam
module load samtools/1.2/gcc.4.4.7
module load picard-tools/1.92/java.1.8.0_20

#make a folder for storing intermediate result
#otherwise, might run out of space on default /tmp
mkdir -p tmp
chmod 777 tmp

#first argument is the name of the output file
outbam=$1
shift
#the rest of the arguments are the bam files we want to merge

java -jar $(which MergeSamFiles.jar) \
  `echo $@ | sed 's/\(\S\+\)/I=&/g'`\
  ASSUME_SORTED=true\
  TMP_DIR=tmp\
  O=$outbam
```

```
==> ./sanchari/j432/bismark_aligned/reportMeth.sh <==
#!/bin/bash
#$ -cwd
#$ -j n
#$ -l h_vmem=4G
#$ -pe smp 1
#$ -S /bin/bash
#$ -m e
#$ -M kith.pradhan@einstein.yu.edu
module load samtools/1.2/gcc.4.4.7
module load python/2.7.8/gcc.4.4.7

REF=/home/kpradha1/projects/hg19/hg19.fa
bam=$1
bname="${bam%. *}"

samtools mpileup -d1000000 -Q0 -B -f $REF $bam | \
  ./mpileup2methylation.py -i - >| ${bname}.bedGraph
```

```

==> ./sanchari/j432/bismark_aligned/mpileup2methylation.py <==
#!/usr/bin/env python

import sys
import argparse

parser = argparse.ArgumentParser(description= """
DESCRIPTION
    Extract methylation calls from samtools mpileup. Only positions with non-zero
count
are printed. Output has is bedGraph with additional columns:
    <chrom> <pos-1> <pos> <pct meth'd> <cnt methylated> <tot count> <strand>

    Memo: bedGraph is 0-based, so if the first base of chr1 is C it will have
position: `chrom 0 1 ... +`

EXAMPLE & RECIPES
    samtools mpileup -d100000 -Q0 -B -l mm9.allcpg.bed.gz -f mmu.fa myreads.bam |
mpileup2methylation.py -i -

    If you want to get only the Cs in a certain context (e.g. CpG) you need to pass
a bed file to mpileup where these positions are. For example, to get all the
CpGs you could use:
    fastaRegexFinder.py -f mmu.fa -r CG --noreverse > mm9.allcpg.bed
(Possibly pipe to `cut -f1-3 | gzip` to make the file smaller)

TESTED:
    14/02/2013: The output of mpileup2methylation.py is almost (but not) identical
to bismark_methylation_extractor (files *.genome-wide_CX|CpG_report.txt). Tested
on synthetic strands single end, and paired-end whole genome. Differences not
investigated
    further but should affect ~1 call in 1000-10000.

""", formatter_class= argparse.RawTextHelpFormatter)

parser.add_argument('--input', '-i',
                    required= True,
                    help='''Input file as produced by samtools mpileup. Use - to
read from stdin.
''')

parser.add_argument('--outfmt', '-f',
                    required= False,
                    choices= ['bedgraph', 'bismark'],
                    default= 'bedgraph',
                    help='''Output format: bedgraph (default) or bismark.
'bismark' output has columns: chrom, pos, strand, count meth'd, count unmeth'd.
The first 5 column of the genome-wide cytosine report produced by
bismark_methylation_extractor should be nearly identical to 'bismark' format.
''')

args= parser.parse_args()
# -----

def cleanCallString(bases):
    """Removes from the call string in mpileup (5th column) the ^ character and
the char next to it. Note TODO: Account for insertions/deletions.
bases:
    String of read bases (5th column of mpileup)

```

```

Return:
    Same string as bases but with ^ and the following char removed
Example:
    bases= '^A.....^k.'
    cleanCallString(bases) >>> '.....'
"""
callString= ''
skip= False
for x in bases:
    if x == '^':
        skip= True
    elif skip:
        skip= False
    else:
        callString += x
return(callString)

def pileup2methylation(chrom, pos, callString, ref, outfmt):
    """Count methylated and unmethylated calls.
    chrom, pos:
        Chromosome (string) and position (int) on the pileup
    callString:
        String of bases obtained by cleanCallString
    ref:
        Reference base as obtained from 3rd column of mpileup

    Memo: mpileup input looks like this:
    chr7    3002089 C      2      .^~.    IA
    chr7    3002090 G      2      ..      HE
    chr7    3002114 C      2      ..      HE

    """
    # ref= mpileup[2]
    # callstring= mpileup[4]
    cnt_M= 0 ## Count methylated
    cnt_m= 0 ## Count unmethylated

    if ref.upper() == 'G':
        strand= '-'
        cnt_M += callString.count(',')
        cnt_m += callString.count('a')
    elif ref.upper() == 'C':
        strand= '+'
        cnt_M += callString.count('.')
        cnt_m += callString.count('T')
    else:
        return(None)
    if (cnt_m + cnt_M) == 0:
        return(None)
    ## Use for first version of methylation2mpileup.py
    ## methList= [mpileup[0], mpileup[1], strand, str(cnt_M), str(cnt_m), ref]
    if outfmt == 'bismark':
        methList= [chrom, str(pos), strand, str(cnt_M), str(cnt_m)]
    elif outfmt == 'bedgraph':
        totreads= cnt_M + cnt_m
        methList= [chrom, str(pos-1), str(pos),
str(round(100*(float(cnt_M)/totreads), 4)), str(cnt_M), str(totreads), strand]
    else:
        sys.exit('Unexpected keyword for outfmt "%s" %(outfmt))

```

```

    return(methList)
# -----

if args.input == '-':
    fin= sys.stdin
else:
    fin= open(args.input)

for line in fin:
    line= line.strip().split('\t')
    callString= cleanCallString(line[4])
    methList= pileup2methylation(chrom= line[0], pos= int(line[1]), callString=
callString, ref= line[2], outfmt= args.outfmt)
    if methList is None:
        pass
    else:
        try:
            print('\t'.join(methList))
        except IOError as e:
            break
fin.close()
sys.exit()

```

```

==> ./sanchari/j432/bismark_aligned/makeBismarkBatch.sh <==
#!/bin/bash
#constructs the qsub script to process a chunk of reads
#writes the script to stdout
#pipe it into qsub if you want to submit it
#
#usage:
#makeBismarkBatch.sh hpneBs reads1.fastq.gz reads2.fastq.gz | qsub

```

```

SNAME=$1
FQ1=$2
FQ2=$3
REF=/home/kpradha1/projects/hg19/

```

```

cat <<PROGRAM_END
#!/bin/bash
#$ -cwd
#$ -N bismark_alignment
#$ -j n
#$ -l h_vmem=5.8G
#$ -pe smp 5
#$ -S /bin/bash
#$ -m e
#$ -M kith.pradhan@einstein.yu.edu

```

```

module load bismark/0.14.5
module load bowtie2/2.2.3/gcc.4.4.7
module load samtools/1.2/gcc.4.4.7
module load picard-tools/1.92/java.1.8.0_20

```

```

SNAME=$1
FQ1=$2
FQ2=$3

```

```

REF=/home/kpradha1/projects/hg19/
bismark --multicore 1 --bowtie2 -p 4 $REF -1 $FQ1 -2 $FQ2
java -jar \$(which SortSam.jar) INPUT=${FQ1##*/}_bismark_bt2_pe.bam OUTPUT=${
{SNAME}_sorted.bam SO=coordinate CREATE_INDEX=true
echo "done" > $SNAME.status
PROGRAM_END

```

```

==> ./sanchari/j432/bismark_aligned/submitReportMeths.sh <==

```

```

#accidentally name the bams .bam.bam
#fix that here
#ls *.bam.bam | sed 's/\(.*\.bam\)\.bam/mv & \1/'

#qsub reportMeth.sh J432_AHHH5NBCXX_Lane1_ACAGTG_HPNE-1_BS_merged_sorted.bam
#qsub reportMeth.sh J432_AHHH5NBCXX_Lane2_GCCAAT_HPNE-10xBS_merged_sorted.bam
#qsub reportMeth.sh J432_BHKVCGBCXX_Lane1_CTTGTA_JD-BS_merged_sorted.bam
#qsub reportMeth.sh J432_BHKVCGBCXX_Lane2_GTGAAA_JD-0xBS_merged_sorted.bam

#qsub sortBam.sh J432_AHHH5NBCXX_Lane1_ACAGTG_HPNE-
1_BS_merged_sorted_mdup_nsorted_clip.bam
#qsub sortBam.sh J432_AHHH5NBCXX_Lane2_GCCAAT_HPNE-
10xBS_merged_sorted_mdup_nsorted_clip.bam
#qsub sortBam.sh J432_BHKVCGBCXX_Lane1_CTTGTA_JD-
BS_merged_sorted_mdup_nsorted_clip.bam
#qsub sortBam.sh J432_BHKVCGBCXX_Lane2_GTGAAA_JD-
0xBS_merged_sorted_mdup_nsorted_clip.bam

qsub reportMeth.sh J432_AHHH5NBCXX_Lane1_ACAGTG_HPNE-
1_BS_merged_sorted_mdup_clip.bam
qsub reportMeth.sh J432_AHHH5NBCXX_Lane2_GCCAAT_HPNE-
10xBS_merged_sorted_mdup_clip.bam
qsub reportMeth.sh J432_BHKVCGBCXX_Lane1_CTTGTA_JD-BS_merged_sorted_mdup_clip.bam
qsub reportMeth.sh J432_BHKVCGBCXX_Lane2_GTGAAA_JD-0xBS_merged_sorted_mdup_clip.bam

```

```

==> ./sanchari/j432/bismark_aligned/testSetup1.sh <==
for fq1 in `ls ../trimmed/split/*1_val_1*`;
do
    fq2=`echo $fq1 | sed 's/\(.*\)1_val_1\(.*)/\12_val_2\2/'`
    pname=`echo $fq1 | sed 's/.*\(\(.*\)1_val_1.fq.\(p.*\)\/\1\2/'`
    #echo $fq1
    #echo $fq2
    #echo $pname
    ./makeBismarkBatch.sh $pname $fq1 $fq2 > ${pname}.sh
done

```

```

==> ./sanchari/j432/bismark_aligned/submitClipOverlaps.sh <==
#qsub clipOverlaps.sh J432_AHHH5NBCXX_Lane1_ACAGTG_HPNE-
1_BS_merged_sorted_mdup_nsorted.bam
#qsub clipOverlaps.sh J432_AHHH5NBCXX_Lane2_GCCAAT_HPNE-
10xBS_merged_sorted_mdup_nsorted.bam
#qsub clipOverlaps.sh J432_BHKVCGBCXX_Lane1_CTTGTA_JD-

```

```
BS_merged_sorted_mdup_nsorted.bam
#qsub clipOverlaps.sh J432_BHKVCGBCXX_Lane2_GTGAAA_JD-
OxBS_merged_sorted_mdup_nsorted.bam
```

```
qsub clipOverlaps.sh J432_AHHH5NBCXX_Lane1_ACAGTG_HPNE-1_BS_merged_sorted_mdup.bam
qsub clipOverlaps.sh J432_AHHH5NBCXX_Lane2_GCCAAT_HPNE-10xBS_merged_sorted_mdup.bam
qsub clipOverlaps.sh J432_BHKVCGBCXX_Lane1_CTTGTA_JD-BS_merged_sorted_mdup.bam
qsub clipOverlaps.sh J432_BHKVCGBCXX_Lane2_GTGAAA_JD-OxBS_merged_sorted_mdup.bam
```

```
==> ./sanchari/j432/bismark_aligned/submitNameSorts.sh <==
qsub nameSort.sh J432_AHHH5NBCXX_Lane1_ACAGTG_HPNE-1_BS_merged_sorted_mdup.bam
qsub nameSort.sh J432_AHHH5NBCXX_Lane2_GCCAAT_HPNE-10xBS_merged_sorted_mdup.bam
qsub nameSort.sh J432_BHKVCGBCXX_Lane1_CTTGTA_JD-BS_merged_sorted_mdup.bam
qsub nameSort.sh J432_BHKVCGBCXX_Lane2_GTGAAA_JD-OxBS_merged_sorted_mdup.bam
```

```
==> ./sanchari/j432/test2/batch2.sh <==
#!/bin/bash
#$ -cwd
#$ -j n
#$ -l h_vmem=15G
#$ -S /bin/bash
#$ -m e
#$ -M kith.pradhan@einstein.yu.edu
module load bismark/0.14.5
module load bowtie2/2.2.3/gcc.4.4.7
module load samtools/1.2/gcc.4.4.7
module load picard-tools/1.92/java.1.8.0_20
```

```
FNAME=J432_AHHH5NBCXX_Lane1_ACAGTG_HPNE-1_BS
SNAME=hpne_bs
FQ1=${FNAME}.1_val_1.fq.gz
FQ2=${FNAME}.2_val_2.fq.gz
REF=/home/kpradha1/projects/hg19/
bismark --bowtie2 $REF -1 $FQ1 -2 $FQ2 --basename $SNAME
java -jar $(which SortSam.jar) INPUT=${SNAME}_pe.bam OUTPUT=${SNAME}_sorted.bam
SO=coordinate
java -jar $(which BuildBamIndex.jar) INPUT=${SNAME}_sorted.bam
java -jar $(which MarkDuplicates.jar) INPUT=${SNAME}_sorted.bam OUTPUT=${SNAME}_sorted_md.bam METRICS_FILE=${SNAME}_mdMetric.txt
java -jar $(which BuildBamIndex.jar) INPUT=${SNAME}_sorted_md.bam
```

```
==> ./sanchari/j432/test2/do_bismark1.sh <==
#!/bin/bash
#$ -cwd
#$ -j n
#$ -l h_vmem=15G
#$ -S /bin/bash
#$ -m e
#$ -M kith.pradhan@einstein.yu.edu
#
# do_bismark.sh
# Brent Calder <brent.calder@einstein.yu.edu>
#
# Convenience script to take fastq.gz input, run trim_galore,
# fastqc, split input, run Bismark, then merge, sort, and index
```

```

# output into BAM.
#

set -o errexit -o nounset -o allelexport -o pipefail

# user options

GENOME_FOLDER=/home/kpradha1/projects/hg19/
GENOME=mm9.fa # not used, this is the original
# genome name at ../fasta, relative to GENOME_FOLDER

TRIM_GALORE_OPTS="" # mainly for new adapter sequence or clips
FASTQC_OPTS="" # optional FASTQC options
BISMARK_OPTS="" # see documentation, 'non-directional' set below (DIRECTIONS)
BOWTIE2_OPTS="" # bowtie2 options for bismark

# number of reads per split work file
READS_PER_FASTQ=4000000
# DIRECTIONS must be 2 or 4 (eg. 4 = "--non_directional")
DIRECTIONS=4
# NTHREADS is the number of threads per DIRECTION
NTHREADS=2
# DIRECTIONS*THREADS = num_proc

#####
# DO NOT EDIT BELOW HERE

USAGE="Usage:\t\tqsub do_bismark.sh forward_read.fastq.gz
[reverse_read.fastq.gz]\n"
ADMON="reads must be in format: name.fastq.gz\n"
PAIRED=0
REVERSE_READ=""
MYID=${$}-${RANDOM}

if [ "$DIRECTIONS" -eq "4" ]; then
    BISMARK_OPTS="${BISMARK_OPTS} --non_directional"
else
    # default back to directional
    DIRECTIONS=2
fi

if [ "$#" -eq "2" ]; then
    PAIRED=1
    REVERSE_READ=$2
    REVERSE=`basename ${REVERSE_READ}/.fastq.gz/`
    TRIM_GALORE_OPTS="${TRIM_GALORE_OPTS} --paired"
    if [ "${#REVERSE_READ}" -eq "${#REVERSE}" ]; then
        USAGE="${USAGE}${ADMON}"
        echo -e "$USAGE" >&2
        exit 2
    fi
else
    if [ "$#" -ne "1" ]; then
        echo -e "$USAGE" >&2
        exit 1
    fi
fi

```



```

FORWARD_READ=$1
FORWARD=`basename ${FORWARD_READ}/.fastq.gz/`

if [ "${#FORWARD_READ}" -eq "${#FORWARD}" ]; then
    USAGE="${USAGE}${ADMON}"
    echo -e "$USAGE" >&2
    exit 2
fi

#####
# REQUIRED MODULES
#####
#source /apps1/modules/init/bash

module load trim_galore/0.3.7/gcc.4.4.7
module load bismark/0.14.5
module load FastQC/0.11.4/java.1.8.0_20
module load picard-tools/1.92/java.1.8.0_20

# might be necessary to set up qsub
if [ -e /etc/profile.d/sge-binaries.sh ]; then
    source /etc/profile.d/sge-binaries.sh
fi

# output dirs
mkdir -p fastqc split bismark trimmed tmp

# trim illumina adapters and -q 20 by default
trim_galore --dont_gzip -o trimmed --fastqc --fastqc_args "${FASTQC_OPTS} -o
./fastqc" $TRIM_GALORE_OPTS $FORWARD_READ $REVERSE_READ

# split files based on READS_PER_FASTQ
if [ "$PAIRED" -eq "0" ]; then
    split -a 3 -l $(( ${READS_PER_FASTQ} * 4 )) trimmed/${FORWARD}_trimmed.fq split/${
FORWARD}.split.
else
    if [ "$PAIRED" -eq "1" ]; then
        split -a 3 -l $(( ${READS_PER_FASTQ} * 4 )) trimmed/${FORWARD}_val_1.fq split/${
FORWARD}.split.
        split -a 3 -l $(( ${READS_PER_FASTQ} * 4 )) trimmed/${REVERSE}_val_2.fq split/${
REVERSE}.split.
    fi
fi

# run bismark on the split files
for x in `ls -1 split/${FORWARD}.split.*`; do
    READSTR=${x}
    suf=${x/*split./}
    if [ "$PAIRED" -eq "1" ]; then
        second=split/${REVERSE}.split.${suf}
        READSTR="-1 ${x} -2 ${second}"
    fi
    qsub -cwd -l p=$(( ${NTHREADS} * ${DIRECTIONS} )) -l mf=30g -V -N bismark-${MYID}
-j y -b y bismark --temp_dir tmp -o bismark --bowtie2 -p $(( ${NTHREADS} * $
{DIRECTIONS} )) $BISMARK_OPTS $BOWTIE2_OPTS $GENOME_FOLDER $READSTR
done

# use picard to merge, sort, create bam and index split SAM upon completion.
SAMS=""

```

```

if [ "$PAIRED" -eq "0" ]; then
    SAMS=`ls -1 split/${FORWARD}.split.* | sed 's|^split|I=bismark|g' | sed 's/
$/_bismark_bt2.sam/g' | tr "\n" " "`
else
    SAMS=`ls -1 split/${FORWARD}.split.* | sed 's|^split|I=bismark|g' | sed 's/
$/_bismark_bt2_pe.sam/g' | tr "\n" " "`
fi
BAM=${FORWARD}.bam

```

```

qsub -S /bin/bash -hold_jid bismark-${MYID} -cwd -V -l mf=4g -j y -N merge -b y
java -jar $PICARD_ROOT/MergeSamFiles.jar $SAMS O=$BAM AS=false SO=coordinate
TMP_DIR=./tmp CREATE_INDEX=true

```

```

==> ./sanchari/j432/trimmed/splitfiles.sh <==
#split each file into 40M line chunks

```

```

NL=40000000
for fq in `ls *.fq.gz`;
do
    nam=`basename $fq .gz`
    #get name without extension
    #echo $fq
    #echo $nam
    echo "split <(zcat $fq) -d -a 3 -l $NL split/${nam}.pt"
done >| split1.sh
chmod +x split1.sh

```

```

==> ./sanchari/j432/trimmed/dlfiles1.sh <==
wget http://waspsystem.einstein.yu.edu/wsfile/get/file/c62d758b-0c20-41b8-a64d-
b84f575f8449/J432_AHHH5NBCXX_Lane1_ACAGTG_HPNE-1_BS.1_val_1.fq.gz
wget http://waspsystem.einstein.yu.edu/wsfile/get/file/b68c7385-632e-45c8-ae31-
00e99c7eb8c0/J432_AHHH5NBCXX_Lane1_ACAGTG_HPNE-1_BS.2_val_2.fq.gz
wget http://waspsystem.einstein.yu.edu/wsfile/get/file/71c87f75-ad4b-4624-b304-
6b3a572915f3/J432_AHHH5NBCXX_Lane2_GCCAAT_HPNE-10xBS.1_val_1.fq.gz
wget http://waspsystem.einstein.yu.edu/wsfile/get/file/a9768b55-8443-4df6-aa3a-
4690eb498630/J432_AHHH5NBCXX_Lane2_GCCAAT_HPNE-10xBS.2_val_2.fq.gz
wget http://waspsystem.einstein.yu.edu/wsfile/get/file/4766ecab-cfb5-4159-9a74-
9773771ffa29/J432_BHKVCGBCXX_Lane1_CTTGTA_JD-BS.1_val_1.fq.gz
wget http://waspsystem.einstein.yu.edu/wsfile/get/file/9b8c42f3-40ad-4301-ac1d-
1e463f8ecd7d/J432_BHKVCGBCXX_Lane1_CTTGTA_JD-BS.2_val_2.fq.gz
wget http://waspsystem.einstein.yu.edu/wsfile/get/file/13acec40-db3f-4de3-ba13-
394e8c1a4455/J432_BHKVCGBCXX_Lane2_GTGAAA_JD-0xBS.1_val_1.fq.gz
wget http://waspsystem.einstein.yu.edu/wsfile/get/file/5619af56-20ea-4324-aa98-
ccb443039dbd/J432_BHKVCGBCXX_Lane2_GTGAAA_JD-0xBS.2_val_2.fq.gz

```

```

==> ./sanchari/j432/trimmed/split1.sh <==
split <(zcat J432_AHHH5NBCXX_Lane1_ACAGTG_HPNE-1_BS.1_val_1.fq.gz) -d -a 3 -l
40000000 split/J432_AHHH5NBCXX_Lane1_ACAGTG_HPNE-1_BS.1_val_1.fq.p
split <(zcat J432_AHHH5NBCXX_Lane1_ACAGTG_HPNE-1_BS.2_val_2.fq.gz) -d -a 3 -l
40000000 split/J432_AHHH5NBCXX_Lane1_ACAGTG_HPNE-1_BS.2_val_2.fq.p
split <(zcat J432_AHHH5NBCXX_Lane2_GCCAAT_HPNE-10xBS.1_val_1.fq.gz) -d -a 3 -l
40000000 split/J432_AHHH5NBCXX_Lane2_GCCAAT_HPNE-10xBS.1_val_1.fq.p
split <(zcat J432_AHHH5NBCXX_Lane2_GCCAAT_HPNE-10xBS.2_val_2.fq.gz) -d -a 3 -l

```

```

40000000 split/J432_AHHH5NBCXX_Lane2_GCCAAT_HPNE-10xBS.2_val_2.fq.p
split <(zcat J432_BHKVCGBCXX_Lane1_CTTGTA_JD-BS.1_val_1.fq.gz) -d -a 3 -l 40000000
split/J432_BHKVCGBCXX_Lane1_CTTGTA_JD-BS.1_val_1.fq.p
split <(zcat J432_BHKVCGBCXX_Lane1_CTTGTA_JD-BS.2_val_2.fq.gz) -d -a 3 -l 40000000
split/J432_BHKVCGBCXX_Lane1_CTTGTA_JD-BS.2_val_2.fq.p
split <(zcat J432_BHKVCGBCXX_Lane2_GTGAAA_JD-0xBS.1_val_1.fq.gz) -d -a 3 -l
40000000 split/J432_BHKVCGBCXX_Lane2_GTGAAA_JD-0xBS.1_val_1.fq.p
split <(zcat J432_BHKVCGBCXX_Lane2_GTGAAA_JD-0xBS.2_val_2.fq.gz) -d -a 3 -l
40000000 split/J432_BHKVCGBCXX_Lane2_GTGAAA_JD-0xBS.2_val_2.fq.p

```

```

==> ./sanchari/mpileup2methylation.py <==
#!/usr/bin/env python

```

```

import sys
import argparse

```

```

parser = argparse.ArgumentParser(description= """
DESCRIPTION

```

```

    Extract methylation calls from samtools mpileup. Only positions with non-zero
count

```

```

    are printed. Output has is bedGraph with additional columns:

```

```

    <chrom> <pos-1> <pos> <pct meth'd> <cnt methylated> <tot count> <strand>

```

```

    Memo: bedGraph is 0-based, so if the first base of chr1 is C it will have
position: `chrom 0 1 ... +`

```

#### EXAMPLE & RECIPES

```

samtools mpileup -d100000 -Q0 -B -l mm9.allcpg.bed.gz -f mmu.fa myreads.bam |
mpileup2methylation.py -i -

```

If you want to get only the Cs in a certain context (e.g. CpG) you need to pass a bed file to mpileup where these positions are. For example, to get all the CpGs you could use:

```

fastaRegexFinder.py -f mmu.fa -r CG --noreverse > mm9.allcpg.bed
(Possibly pipe to `cut -f1-3 | gzip` to make the file smaller)

```

#### TESTED:

14/02/2013: The output of mpileup2methylation.py is almost (but not) identical to bismark\_methylation\_extractor (files \*.genome-wide\_CX|CpG\_report.txt). Tested on synthetic strands single end, and paired-end whole genome. Differences not investigated

further but should affect ~1 call in 1000-10000.

```

""", formatter_class= argparse.RawTextHelpFormatter)

```

```

parser.add_argument('--input', '-i',
                    required= True,
                    help='''Input file as produced by samtools mpileup. Use - to
read from stdin.
                    ''')

```

```

parser.add_argument('--outfmt', '-f',
                    required= False,
                    choices= ['bedgraph', 'bismark'],
                    default= 'bedgraph',
                    help='''Output format: bedgraph (default) or bismark.
'bismark' output has columns: chrom, pos, strand, count meth'd, count unmeth'd.
The first 5 column of the genome-wide cytosine report produced by
bismark_methylation_extractor should be nearly identical to 'bismark' format.

```

```

        ''')

args= parser.parse_args()
# -----

def cleanCallString(bases):
    """Removes from the call string in mpileup (5th column) the ^ character and
    the char next to it. Note TODO: Account for insertions/deletions.
    bases:
        String of read bases (5th column of mpileup)
    Return:
        Same string as bases but with ^ and the following char removed
    Example:
        bases= '^A.....^k.'
        cleanCallString(bases) >>> '.....'
    """
    callString= ''
    skip= False
    for x in bases:
        if x == '^':
            skip= True
        elif skip:
            skip= False
        else:
            callString += x
    return(callString)

def pileup2methylation(chrom, pos, callString, ref, outfmt):
    """Count methylated and unmethylated calls.
    chrom, pos:
        Chromosome (string) and position (int) on the pileup
    callString:
        String of bases obtained by cleanCallString
    ref:
        Reference base as obtained from 3rd column of mpileup

    Memo: mpileup input looks like this:
    chr7    3002089 C    2    .^~.    IA
    chr7    3002090 G    2    ..    HE
    chr7    3002114 C    2    ..    HE

    """
    # ref= mpileup[2]
    # callstring= mpileup[4]
    cnt_M= 0 ## Count methylated
    cnt_m= 0 ## Count unmethylated

    if ref.upper() == 'G':
        strand= '-'
        cnt_M += callString.count(',')
        cnt_m += callString.count('a')
    elif ref.upper() == 'C':
        strand= '+'
        cnt_M += callString.count('.')
        cnt_m += callString.count('T')
    else:
        return(None)
    if (cnt_m + cnt_M) == 0:
        return(None)

```

```

## Use for first version of methylation2mpileup.py
## methList= [mpileup[0], mpileup[1], strand, str(cnt_M), str(cnt_m), ref]
if outfmt == 'bismark':
    methList= [chrom, str(pos), strand, str(cnt_M), str(cnt_m)]
elif outfmt == 'bedgraph':
    totreads= cnt_M + cnt_m
    methList= [chrom, str(pos-1), str(pos),
str(round(100*(float(cnt_M)/totreads), 4)), str(cnt_M), str(totreads), strand]
else:
    sys.exit('Unexpected keyword for outfmt "%s"' %(outfmt))
return(methList)
# -----

if args.input == '-':
    fin= sys.stdin
else:
    fin= open(args.input)

for line in fin:
    line= line.strip().split('\t')
    callString= cleanCallString(line[4])
    methList= pileup2methylation(chrom= line[0], pos= int(line[1]), callString=
callString, ref= line[2], outfmt= args.outfmt)
    if methList is None:
        pass
    else:
        try:
            print('\t'.join(methList))
        except IOError as e:
            break
fin.close()
sys.exit()

```

```

==> ./sanchari/j515/markDuplicates.sh <==
#!/bin/bash
#$ -cwd
#$ -j n
#$ -l h_vmem=4G
#$ -pe smp 4
#$ -S /bin/bash
#$ -m e
#$ -M kith.pradhan@einstein.yu.edu
module load samtools/1.2/gcc.4.4.7
module load picard-tools/1.92/java.1.8.0_20

```

```

bam=$1
bname="${bam%.*}"

```

```

java -jar $(which BuildBamIndex.jar) INPUT=${bam}
java -jar $(which MarkDuplicates.jar) INPUT=${bam} OUTPUT=${bname}_mdup.bam
METRICS_FILE=${bname}_mdMetric.txt
java -jar $(which BuildBamIndex.jar) INPUT=${bname}_mdup.bam

```

```

==> ./sanchari/j515/dl1.sh <==

```

```
wget http://waspsystem.einstein.yu.edu/wsfile/get/file/FA194627-F178-4366-993C-519448DFF5EA/J515_BHMJHHBCXX_Lane2_TCCTGA_JD13D.1.fastq.gz
wget http://waspsystem.einstein.yu.edu/wsfile/get/file/F0F9499C-7774-4EAE-B497-353FE5E9CA15/J515_BHMJHHBCXX_Lane2_TCCTGA_JD13D.2.fastq.gz
wget http://waspsystem.einstein.yu.edu/wsfile/get/file/E331804B-2100-40FF-B04B-D17A802047FA/J515_BHMJHHBCXX_Lane2_TCCTGA_JD13D.1_val_1.fq.gz
wget http://waspsystem.einstein.yu.edu/wsfile/get/file/72DC4E0A-1EB1-457E-A528-EE502EE3CBCC/J515_BHMJHHBCXX_Lane2_TCCTGA_JD13D.2_val_2.fq.gz
wget http://waspsystem.einstein.yu.edu/wsfile/get/file/FA706ED4-C816-4362-A959-4B63BDF906AD/J515_BHMJHHBCXX_Lane2_TCCTGA_JD13D.1_val_1_fastqc.html
wget http://waspsystem.einstein.yu.edu/wsfile/get/file/DDF55E49-DE3D-48CB-B736-503044E10D3E/J515_BHMJHHBCXX_Lane2_TCCTGA_JD13D.2_val_2_fastqc.html
wget http://waspsystem.einstein.yu.edu/wsfile/get/file/CCB2D19E-81F2-4B08-8C99-033F38C23B44/J515_BHMJHHBCXX_Lane2_TCCTGA_JD13D.1_val_1_screen.png
```

```
==> ./sanchari/j515/commands1.sh <==
```

```
qsub runBowtie.sh jd J515_BHMJHHBCXX_Lane2_TCCTGA_JD13D.1_val_1.fq.gz
J515_BHMJHHBCXX_Lane2_TCCTGA_JD13D.2_val_2.fq.gz
```

```
#first remove duplicates
qsub markDuplicates.sh jd_sorted.bam
```

```
#run peak finding on this sample alone
```

```
qsub ~/projects/qsub_scripts/runMacs.sh jd_sorted_mdup.bam
#can't have .. in file names.
#make a link instead
#qsub ~/projects/qsub_scripts/runMacs2.sh jd_sorted_mdup.bam
../j455/hpne_sorted_mdup.bam
```

```
ln -s ../j455/hpne_sorted_mdup.bam .
qsub ~/projects/qsub_scripts/runMacs2.sh jd_sorted_mdup.bam hpne_sorted_mdup.bam
```

```
==> ./sanchari/j515/runBowtie.sh <==
```

```
#!/bin/bash
#$ -cwd
#$ -N bowtie_alignment
#$ -j n
#$ -l h_vmem=5.8G
#$ -pe smp 4
#$ -S /bin/bash
#$ -m e
#$ -M kith.pradhan@einstein.yu.edu
```

```
#process a pair of fastqs
```

```
#
```

```
#usage:
```

```
#qsub runBowtie.sh aligned_name reads1.fastq.gz reads2.fastq.gz
```

```
SNAME=$1
```

```
FQ1=$2
```

```
FQ2=$3
REF=../../hg19/hg19

module load bowtie2/2.2.3/gcc.4.4.7
module load samtools/1.2/gcc.4.4.7
module load picard-tools/1.92/java.1.8.0_20

#bowtie2 -t -p 2 -q --local -x $REF -1 <(zcat $FQ1) -2 <(zcat $FQ2) 2>| summary_${
{SNAME}.txt | samtools view -bS - >| ${SNAME}.bam
java -jar $(which SortSam.jar) INPUT=${SNAME}.bam OUTPUT=${SNAME}_sorted.bam
SO=coordinate CREATE_INDEX=true
echo "done" >| $SNAME.status
```

```
==> ./sanchari/j455_j515/markDuplicates.sh <==
#!/bin/bash
#$ -cwd
#$ -j n
#$ -l h_vmem=4G
#$ -pe smp 4
#$ -S /bin/bash
#$ -m e
#$ -M kith.pradhan@einstein.yu.edu
module load samtools/1.2/gcc.4.4.7
module load picard-tools/1.92/java.1.8.0_20
```

```
bam=$1
bname="${bam%. *}"

java -jar $(which BuildBamIndex.jar) INPUT=${bam}
java -jar $(which MarkDuplicates.jar) INPUT=${bam} OUTPUT=${bname}_mdup.bam
METRICS_FILE=${bname}_mdMetric.txt
java -jar $(which BuildBamIndex.jar) INPUT=${bname}_mdup.bam
```

```
==> ./sanchari/j455_j515/runMac2.sh <==
#!/bin/bash
#$ -cwd
#$ -N macs2
#$ -j n
#$ -l h_vmem=9.8G
#$ -pe smp 1
#$ -S /bin/bash
#$ -m e
#$ -M kith.pradhan@einstein.yu.edu

#run mac2 peak finding software on a single target bam
#usually we need a control file, igg or input
#
#usage:
#qsub runMac2.sh bamfile.bam
```

```
BAM1=$1
BAM2=$2
NAME=C${BAM1%. *}_T${BAM2%. *}
FOL=macs_${NAME}
```

```

#module load MACS2/2.1.0/python.2.7.8
module load MACS2/2.1.0-update/python.2.7.8

echo $BAM1
echo $BAM2
echo $NAME
echo $FOL

macs2 callpeak -f BAMPE -c $BAM1 -t $BAM2 -n $NAME --outdir $FOL --verbose 3

==> ./sanchari/j455_j515/ngsplot/commands_ngs.sh <==

#tss, tes, genebody, exon, cgi, enhancer, dhs
jdbam=/home/kpradhan/Desktop/hpc_home/projects/sanchari/j455_j515/jd_sorted_mdup_mer
ged.bam
hpnebam=/home/kpradhan/Desktop/hpc_home/projects/sanchari/j455_j515/hpne_sorted_mdup
p.bam

#
#ngs.plot.r -P 4 -G hg19 -R tss -C $jdbam -O jdplot_tss -T jdAtac -L 5000
#ngs.plot.r -P 4 -G hg19 -R tes -C $jdbam -O jdplot_tes -T jdAtac -L 5000
#ngs.plot.r -P 4 -G hg19 -R genebody -C $jdbam -O jdplot_genebody -T jdAtac -L 5000
#ngs.plot.r -P 4 -G hg19 -R exon -C $jdbam -O jdplot_exon -T jdAtac -L 5000
#ngs.plot.r -P 4 -G hg19 -R cgi -C $jdbam -O jdplot_cgi -T jdAtac -L 5000
#
#ngs.plot.r -P 4 -G hg19 -R tss -C $hpnebam -O hpneplot_tss -T hpneAtac -L 5000
#ngs.plot.r -P 4 -G hg19 -R tes -C $hpnebam -O hpneplot_tes -T hpneAtac -L 5000
#ngs.plot.r -P 4 -G hg19 -R genebody -C $hpnebam -O hpneplot_genebody -T hpneAtac
-L 5000
#ngs.plot.r -P 4 -G hg19 -R exon -C $hpnebam -O hpneplot_exon -T hpneAtac -L 5000
#ngs.plot.r -P 4 -G hg19 -R cgi -C $hpnebam -O hpneplot_cgi -T hpneAtac -L 5000

#run these two again
ngs.plot.r -P 4 -G hg19 -R enhancer -C $jdbam -O jdplot_enhancer -T jdAtac -L 5000
ngs.plot.r -P 4 -G hg19 -R dhs -C $jdbam -O jdplot_dhs -T jdAtac -L 5000
ngs.plot.r -P 4 -G hg19 -R enhancer -C $hpnebam -O hpneplot_enhancer -T hpneAtac -L
5000
ngs.plot.r -P 4 -G hg19 -R dhs -C $hpnebam -O hpneplot_dhs -T hpneAtac -L 5000

==> ./sanchari/j455_j515/mergeBams.sh <==
#!/bin/bash
#$ -cwd
#$ -j n
#$ -l h_vmem=4G
#$ -pe smp 4
#$ -S /bin/bash
#$ -m e
#$ -M kith.pradhan@einstein.yu.edu
#usage:
#qsub mergeBams.sh outfile.bam infile1.bam infile2.bam infile3.bam
#qsub mergeBams.sh hpne_bs.bam *hpne*bs*sorted*bam
module load samtools/1.2/gcc.4.4.7
module load picard-tools/1.92/java.1.8.0_20

#make a folder for storing intermediate result
#otherwise, might run out of space on default /tmp
mkdir -p tmp
chmod 777 tmp

```



```

#first argument is the name of the output file
outbam=$1
shift
#the rest of the arguments are the bam files we want to merge

java -jar $(which MergeSamFiles.jar) \
`echo $@ | sed 's/\(\S\+\)/I=&/g'`\
ASSUME_SORTED=true\
TMP_DIR=tmp\
O=$outbam

==> ./sanchari/j455_j515/commands1.sh <==

ls ../j515/jd_sorted.bam
ls ../j455/jd_sorted.bam

#first remove duplicates
qsub markDuplicates.sh jd_sorted.bam

#then merge the bams
qsub mergeBams.sh jd_sorted_mdup_merged.bam ../j515/jd_sorted_mdup.bam
../j455/jd_sorted_mdup.bam

#now run peak finding
qsub ~/projects/qsub_scripts/runMacs.sh jd_sorted_mdup_merged.bam

ln -s ../j455/hpne_sorted_mdup.bam .
qsub ~/projects/qsub_scripts/runMacs2.sh jd_sorted_mdup_merged.bam
hpne_sorted_mdup.bam
qsub ~/projects/qsub_scripts/runMacs2.sh hpne_sorted_mdup.bam
jd_sorted_mdup_merged.bam

==> ./sanchari/j455_j515/addAnnotationToResults.r <==

library("ChIPpeakAnno")
library(EnsDb.Hsapiens.v75)

library("biomaRt")
library("VariantAnnotation")
library(TxDb.Hsapiens.UCSC.hg19.knownGene)
txdb_hg19 <- TxDb.Hsapiens.UCSC.hg19.knownGene

library(GenomicFeatures)
hg19.refseq.db <- makeTxDbFromUCSC(genome="hg19", table="refGene")
refseq.genes<- genes(hg19.refseq.db)

options(stringsAsFactors=F)

getSiteCounts <- function(x){
  input = GRanges(seqnames=x[,1], ranges=IRanges(x[,2], x[,2]+1), strand="*")
  loc_hg19 <- locateVariants(input, txdb_hg19, AllVariants())
  loc_hg19 = loc_hg19[!duplicated(loc_hg19)]
}

```

```

    table(loc_hg19$LOCATION)
}

#read in the peak lists
atac.hpne.only =
read.table("macs_Cjd_sorted_mdup_merged_Thpne_sorted_mdup/Cjd_sorted_mdup_merged_Th
pne_sorted_mdup_peaks.xls", header=T)
atac.jd.only =
read.table("macs_Chpn sorted_mdup_Tjd_sorted_mdup_merged/Chpn sorted_mdup_Tjd_sor
ted_mdup_merged_peaks.xls", header=T)
#atac.hpne.only =
read.table("macs_Cjd_sorted_mdup_merged_Thpne_sorted_mdup/Cjd_sorted_mdup_merged_Th
pne_sorted_mdup_summits.bed")
#atac.jd.only =
read.table("macs_Chpn sorted_mdup_Tjd_sorted_mdup_merged/Chpn sorted_mdup_Tjd_sor
ted_mdup_merged_summits.bed")
head(atac.hpne.only)
head(atac.jd.only)

#this is how it's done with oxbs
sCounts.hpne = getSiteCounts(atac.hpne.only)
sCounts.jd = getSiteCounts(atac.jd.only)

sCounts.hpne
sCounts.jd

sCounts.hpne/sum(sCounts.hpne)
sCounts.jd /sum(sCounts.jd)

chunk <- function(x, n){
  split(x, ceiling(seq_along(x)/n))
}

getGenesFromPeaks_chunks <- function(peakValue_chunks){
  results = list()
  #process in chunks
  for (i in 1:length(peakValue_chunks)){
    chunk = peakValue_chunks[[i]]
    print (chunk[1])
    res = NA
    try({
      G = getBM(attributes = c("hgnc_symbol", "chromosome_name",
"start_position", "end_position"), filters = c("chromosomal_region"), values =
chunk, mart=grch37)
      res = unique(G[, 'hgnc_symbol'])
    }, silent = T)
    results[[i]] = res
  }

  results
}

```

```

getGenesFromPeaks <- function(peaks, chunkSize=1000){
  values = paste0(gsub(peaks[,1], pat="chr(.*?)", rep="\1", perl=T), ":",
peaks[,2], ":", peaks[,3])
  peakValue_chunks = chunk(values, chunkSize)

  results = getGenesFromPeaks_chunks(peakValue_chunks)

  unique(unlist(results))
  #or maybe do a while loop
  #if there were any errors, try one more time
  #check results for NA entries
  #ix = which(sapply(results, function(x){any(is.na(x))}))
  #if (length(ix) > 0){
  #  results2 = getGenesFromPeaks_chunks(peakValue_chunks[ix])
  #}
}

filterPeaks <- function(peaks, grange){
  #intersect the peaks with the TSS locations
  #the chromosomal locations of the peaks
  #granges requires format of chr1:pos1-pos2
  x = GRanges(paste0(gsub(peaks[,1], pat="chr(.*?)", rep="\1", perl=T), ":",
peaks[,2], "-", peaks[,2]+1))
  #which peaks overlap with Tss's
  res = findOverlaps(x, grange)
  ix = unique(queryHits(res))
  peaks[ix,]
}

#get a list of TSS's +/- bp for all all genes
all.genes <- unique( getBM(attributes = "hgnc_symbol", values = "*", mart = grch37)
)
bp = 2000
tss = getBM(attributes=c("chromosome_name", "transcript_start", "transcript_end"),
  filters="hgnc_symbol", values=all.genes$hgnc_symbol, mart=grch37)
tss.2k = GRanges(paste0(tss$chromosome_name, ":", tss$transcript_start-bp, "-",
tss$transcript_start+bp))

#filter away all the sites that are more than 2kb from a TSS
atac.jd.tss2k = filterPeaks(atac.jd.only, tss.2k)
atac.hpne.tss2k = filterPeaks(atac.hpne.only, tss.2k)
dim(atac.jd.tss2k)
dim(atac.hpne.tss1k)

appendClosestGeneInfo <- function(x, pos = 2){
  res = lapply(1:nrow(x), function(i){
    if (i %% 1000 == 0){
      print(i)
    }
    genes = findClosestGene(x[i,1],x[i, pos],"hg19")
    #if there's more than one, just take the first
    data.frame(genes[1,])
  })
}

```

```

        x.res = do.call(rbind, res)
        cbind(x.res, x)
    }

    atac.jd.tss2k.genes = appendClosestGeneInfo(atac.jd.tss2k, 5)
    atac.hpne.tss2k.genes = appendClosestGeneInfo(atac.hpne.tss2k, 5)

    head(atac.jd.tss2k.genes)
    head(atac.hpne.tss2k.genes)

    #filter away the peaks further than 2k from a gene tss
    filterOnTss <- function(x, D){
        x[abs(x$abs_summit - x$txStart) <= D,]
    }

    atac.jd.tss2k.genes[abs(atac.jd.tss2k.genes$Distance) <= 2000,]

    x.jd = filterOnTss(atac.jd.tss2k.genes, 2000)
    x.hpne = filterOnTss(atac.hpne.tss2k.genes, 2000)
    write.table(x = x.jd, file="geneAnnoSets/atac_jd_tss2k_genes.txt", row.names=F,
        sep="\t")
    write.table(x = x.hpne, file="geneAnnoSets/atac_hpne_tss2k_genes.txt", row.names=F,
        sep="\t")

    #redo the region type counts
    #on just the TSS close peaks
    sCounts.hpne = getSiteCounts(x.jd)
    sCounts.jd = getSiteCounts(x.hpne)

    sCounts.hpne
    sCounts.jd

    sCounts.hpne/sum(sCounts.hpne)
    sCounts.jd /sum(sCounts.jd)

    #####

    x = atac.jd.tss2k

    res = lapply(1:nrow(x), function(i){
        if (i %% 1000 == 0){
            print(i)
        }
        genes = findClosestGene(x[i,1],x[i, 2],"hg19")
        #if there's more than one, just take the first
        data.frame(genes[1,])
    })

    x.res = do.call(rbind, res)
    head(x.res)

```

```

#load in all the gene info from hg19
knownGenes <- genes(EnsDb.Hsapiens.v75)
rd <- RangedData(IRanges(start = x[,2],
  end = x[,3]), space = x[,1])
ranges.peaks = toGRanges(rd, format="RangedData")

#annotate ranges with the knownGenes database
anno <- annotatePeakInBatch(ranges.peaks, AnnotationData=knownGenes)

#make sure to only take 1 result
x = anno[!(duplicated(anno$peak))]
x$feature

```

```

tssgenes.jd = getGenesFromPeaks(atac.jd.tss2k)
tssgenes.hpne = getGenesFromPeaks(atac.hpne.tss2k)

```

lis

```

grch37 = useMart(biomart="ENSEMBL_MART_ENSEMBL",
  host="feb2014.archive.ensembl.org", path="/biomart/martservice",
  dataset="hsapiens_gene_ensembl")
head(atac.hpne.only)
pos = paste0(substr(atac.hpne.only[,1], 4, 99), ":", atac.hpne.only[,2], ":",
  atac.hpne.only[,3])
#how to get gene id info
G = getBM(attributes=c("hgnc_symbol", "chromosome_name", "start_position",
  "end_position", "gene_biotype"), filters = "chromosomal_region", values =
  pos[1:1000], mart=grch37)

```

```

==> ./sanchari/j455_j515/runMacs.sh <==
#!/bin/bash
#$ -cwd
#$ -N macs2
#$ -j n
#$ -l h_vmem=9.8G
#$ -pe smp 1
#$ -S /bin/bash
#$ -m e
#$ -M kith.pradhan@einstein.yu.edu

```

```

#run mac2 peak finding software on a single target bam
#usually we need a control file, igg or input
#
#usage:
#qsub runMacs.sh bamfile.bam

```

```

BAM=$1
NAME=${BAM%. *}
FOL=macs_${NAME}

#module load MACS2/2.1.0/python.2.7.8
module load MACS2/2.1.0-update/python.2.7.8

echo $BAM
echo $NAME
echo $FOL

macs2 callpeak -f BAMPE -t $BAM -n $NAME --outdir $FOL --verbose 3
#macs2 callpeak -t $BAM -n $NAME --outdir $FOL --call-summits --verbose 3

==> ./sanchari/j432_j446/commands2_mc.sh <==
#prepare files for mc discovery.

#both BS and 0xBS should have no converted bases
#1. write an r script that goes through each chromosome
# writes the site position if both Bs and oxbs have 0% conversino

#run the stream based version of the prog
for chr in Y {22..1} X
do
    #echo $chr
    echo "./findMcSites_stream.r conversionCounts/HPNE_BS_${chr}.txt.gz
conversionCounts/HPNE_0xBS_${chr}.txt.gz mcSites/stream_mcSites_HPNE_${chr}.txt"
    echo "./findMcSites_stream.r conversionCounts/JD_BS_${chr}.txt.gz
conversionCounts/JD_0xBs_${chr}.txt.gz mcSites/stream_mcSites_JD_${chr}.txt"
done | parallel -j 6

#messed up conversinoCountsHPNE_BS_22
#either redo....or skip it and take it from results above.

#do the same using the hpc
chr=21
echo $chr
qsub runFindMcSites.sh test1/HPNE_BS_${chr}.txt.gz test1/HPNE_0xBS_${chr}.txt.gz
hpc_mcSites/stream_mcSites_HPNE_${chr}.txt

#edited this 12-12-16
for chr in Y {22..1} X
do
    echo $chr
    qsub runFindMcSites.sh conversionCounts/HPNE_BS_${chr}.txt.gz
conversionCounts/HPNE_0xBS_${chr}.txt.gz mcSites_fixed/mcSites_HPNE_${chr}.txt
    qsub runFindMcSites.sh conversionCounts/JD_BS_${chr}.txt.gz
conversionCounts/JD_0xBs_${chr}.txt.gz mcSites/mcSites_JD_${chr}.txt
done

#ran this 12-12-16
#the new faster way using unix tools
for chr in Y {22..1} X
do
    echo $chr

```

```

time join <(zcat conversionCounts/HPNE_BS_${chr}.txt.gz | cut -f2,3,4 | awk
'{ printf "%010i %i %i\n" , $1 , $2 , $3 }') <(zcat conversionCounts/HPNE_0xBS_${
chr}.txt.gz | cut -f2,3,4 | awk '{ printf "%010i %i %i\n" , $1 , $2 , $3 }') | awk
'{if ($2 == $3 && $3 >= 4 && $4 == $5 && $5 >= 4) print $0}' | sed 's/^0*//' | sed
-e "s/./chr$chr &/" > mcSites_fixed/mcSites_HPNE_${chr}.txt
time join <(zcat conversionCounts/JD_BS_${chr}.txt.gz | cut -f2,3,4 | awk
'{ printf "%010i %i %i\n" , $1 , $2 , $3 }') <(zcat conversionCounts/JD_0xBS_${
chr}.txt.gz | cut -f2,3,4 | awk '{ printf "%010i %i %i\n" , $1 , $2 , $3 }') | awk
'{if ($2 == $3 && $3 >= 4 && $4 == $5 && $5 >= 4) print $0}' | sed 's/^0*//' | sed
-e "s/./chr$chr &/" > mcSites_fixed/mcSites_JD_${chr}.txt
done

```

```

#join the BS and 0XBS files
#unzip
#take out the chr* field
#pad the position with zeros so it's lexicographical sorted
#retain the rows that have 0 conversion and at least 4 reads in both
#unpad the position
#tack on the chr* field

```

```

#merge all the chromos into one file per sample
cd hpc_mcSites
for chr in {1..22} X Y
do
echo $chr
cat stream_mcSites_HPNE_${chr}.txt >> mcSites_HPNE_all.txt
cat stream_mcSites_JD_${chr}.txt >> mcSites_JD_all.txt
done

```

```

#join with the list of common4 sites
#1. sort mcsites by chr pos alphabetically
# do this by adding a # between the 2nd and 3rd columns
# effectively merging chr/pos into 1 field, and rest into another field
# turn spaces into tabs
#2. join with commons sites
time sort -k 1,2 ../commonSites/common4.txt > ../commonSites/sorted_common4.txt
time join -t# ../commonSites/sorted_common4.txt <(cat mcSites_HPNE_all.txt | sort
-k 1,2 | sed 's/\(\w*\w*\w*\)\(.*\)/\1#\2/' | sed 's/ /\t/g') >|
common4_mcSites_HPNE.txt
time join -t# ../commonSites/sorted_common4.txt <(cat mcSites_JD_all.txt | sort -k
1,2 | sed 's/\(\w*\w*\w*\)\(.*\)/\1#\2/' | sed 's/ /\t/g') >|
common4_mcSites_JD.txt

```

#12-13-16

```

#now filter all the cpg sites
for chr in Y {22..1} X
do
#mcSites are separated by spaces, not tabs
echo $chr
qsub ../filterCpg/filterCpg.sh mcSites_fixed/mcSites_JD_${chr}.txt
mcSites_fixed/cpg/mcSites_JD_${chr}_cpg.txt
qsub ../filterCpg/filterCpg.sh mcSites_fixed/mcSites_HPNE_${chr}.txt
mcSites_fixed/cpg/mcSites_HPNE_${chr}_cpg.txt
done

```

```
#####  
#scratch#####  
join -t# ../commonSites/common4.txt <(cat mcSites_HPNE_all.txt | sort -k 1,2 | sed  
's/\(\w*\w*\w*\)\(.*\)/\1#\2/')  
  
cat mcSites_HPNE_all.txt | sort -k 1,2 | sed 's/\(\w*\w*\w*\)\(.*\)/\1#\2/' | head  
-1000 > t1.txt  
head t1.txt | sed 's/ /\t/g'
```

```
join -t# ../commonSites/sorted_common4.txt <(cat t1.txt | sed 's/ \t/g')
```

```
head -1000 ../commonSites/common4.txt  
head -10 ../commonSites/common4.txt
```

```
==> ./sanchari/j432_j446/runHmcSites.sh <==
```

```
./findHmcSites.r conversionCounts/HPNE_BS_22.txt.gz  
conversionCounts/HPNE_0xBS_22.txt.gz hmcSites_HPNE_22.txt
```

```
#for chr in {1..22} X Y  
for chr in Y {22..1} X  
do  
    echo $chr  
    ./findHmcSites.r conversionCounts/HPNE_BS_${chr}.txt.gz  
conversionCounts/HPNE_0xBS_${chr}.txt.gz hmcSites_HPNE_${chr}.txt  
    ./findHmcSites.r conversionCounts/JD_BS_${chr}.txt.gz  
conversionCounts/JD_0xBs_${chr}.txt.gz hmcSites_JD_${chr}.txt  
done
```

```
for chr in Y {22..1} X  
do  
    echo $chr  
    ./findHmcSites.r conversionCounts/JD_BS_${chr}.txt.gz  
conversionCounts/JD_0xBs_${chr}.txt.gz hmcSites_JD_${chr}.txt  
done
```

```
#run the stream based version of the prog  
for chr in 1 2 3  
do  
    echo $chr  
    ./findHmcSites_stream.r conversionCounts/HPNE_BS_${chr}.txt.gz  
conversionCounts/HPNE_0xBS_${chr}.txt.gz stream_hmcSites_HPNE_${chr}.txt&  
    ./findHmcSites_stream.r conversionCounts/JD_BS_${chr}.txt.gz  
conversionCounts/JD_0xBs_${chr}.txt.gz stream_hmcSites_JD_${chr}.txt&  
done
```

```
#run the python based version
```



```

for chr in Y {22..1} X
do
    echo $chr
    ./findHmcSites.py conversionCounts/HPNE_BS_${chr}.txt.gz
conversionCounts/HPNE_OxBS_${chr}.txt.gz hmcSites_fixed/hmcSites_HPNE_${chr}.txt
    ./findHmcSites.py conversionCounts/JD_BS_${chr}.txt.gz
conversionCounts/JD_OxBS_${chr}.txt.gz hmcSites_fixed/hmcSites_JD_${chr}.txt
done

#12-12-16
#run on hpc cluster
#12-15-16
#reran, because a bug was found in findHmcSites. Manmy sites were missing
#change script to only output sites with at least 4 reads in both bs and oxbs
for chr in Y {22..1} X
do
    echo $chr
    qsub findHmcSites.sh conversionCounts/HPNE_BS_${chr}.txt.gz
conversionCounts/HPNE_OxBS_${chr}.txt.gz hmcSites_fixed2/hmcSites_HPNE_${chr}.txt
    qsub findHmcSites.sh conversionCounts/JD_BS_${chr}.txt.gz
conversionCounts/JD_OxBS_${chr}.txt.gz hmcSites_fixed2/hmcSites_JD_${chr}.txt
done

#why is chr17 so small in JD?
qsub findHmcSites.sh conversionCounts/JD_BS_17.txt.gz
conversionCounts/JD_OxBS_17.txt.gz test1/hmcSites_JD_17.txt

#now filter them all for cpg sites
chr="Y"

qsub ../filterCpg/filterCpg.sh hmcSites_fixed/hmcSites_JD_${chr}.txt
hmcSites_fixed/cpg/hmcSites_JD_${chr}_cpg.txt
qsub ../filterCpg/filterCpg.sh test1/hmcSites_JD_${chr}.txt test1/hmcSites_JD_${
chr}_cpg.txt

#12-13-16
for chr in Y {22..1} X
do
    echo $chr
    qsub ../filterCpg/filterCpg.sh hmcSites_fixed2/hmcSites_JD_${chr}.txt
hmcSites_fixed2/cpg/hmcSites_JD_${chr}_cpg.txt
    qsub ../filterCpg/filterCpg.sh hmcSites_fixed2/hmcSites_HPNE_${chr}.txt
hmcSites_fixed2/cpg/hmcSites_HPNE_${chr}_cpg.txt
done

cd cpg

#join the jd and hpne sites into one
#run mergeSites.r

#combine all the chromosomes into one file

```

```
for chr in {1..22} X Y
do
    echo $chr
    cat hmcSites_BOTH_${chr}_cpg_common4.txt >> hmcSites_BOTH_all_cpg_common4.txt
done
```

```
==> ./sanchari/j432_j446/commands.sh <==
#testing
tail -50 J432_AHHH5NBCXX_Lane1_ACAGTG_HPNE-1_BS_merged_sorted_mdup_clip.bedGraph >>
file1.txt
tail -50 J446_AHLT3HBCXX_Lane1_ACAGTG_HPNE-1_BS_merged_sorted_mdup_clip.bedGraph >>
file2.txt
./mergeCounts.pl <(cut -f1,2,5,6 file1.txt) <(cut -f1,2,5,6 file2.txt) chr10
```

```
function mergeCounts {
    file1=$1
    file2=$2
    outfile=$3

    for chr in {1..22} X Y
    do
        echo $chr
        time ./mergeCounts.pl <(cut -f1,2,5,6 $file1 | grep -e "^chr${chr}\s") <(cut
-f1,2,5,6 $file2 | grep -e "^chr${chr}\s") chr${chr} | gzip > ${outfile}_${chr}.txt.gz
    done
}
}
```

```
mergeCounts\
file1.txt\
file2.txt\
test
```

```
mergeCounts\
J432_AHHH5NBCXX_Lane1_ACAGTG_HPNE-1_BS_merged_sorted_mdup_clip.bedGraph\
J446_AHLT3HBCXX_Lane1_ACAGTG_HPNE-1_BS_merged_sorted_mdup_clip.bedGraph\
HPNE_BS
```

```
mergeCounts\
J432_AHHH5NBCXX_Lane2_GCCAAT_HPNE-10xBS_merged_sorted_mdup_clip.bedGraph\
J446_AHLT3HBCXX_Lane2_GCCAAT_HPNE-1-0xBS_merged_sorted_mdup_clip.bedGraph\
HPNE_0xBS
```

```
mergeCounts\
J432_BHKVCGBCXX_Lane1_CTTGTA_JD-BS_merged_sorted_mdup_clip.bedGraph\
J446_BHLYGMBCXX_Lane1_CTTGTA_JD-BS_merged_sorted_mdup_clip.bedGraph\
JD_BS
```

```
mergeCounts\
J432_BHKVCGBCXX_Lane2_GTGAAA_JD-0xBS_merged_sorted_mdup_clip.bedGraph\
J446_BHLYGMBCXX_Lane2_GTGAAA_JD-0xBS_merged_sorted_mdup_clip.bedGraph\
JD_0xBS
```

```
#####
```

```
file1=J432_AHHH5NBCXX_Lane1_ACAGTG_HPNE-1_BS_merged_sorted_mdup_clip.bedGraph
file2=J446_AHLT3HBCXX_Lane1_ACAGTG_HPNE-1_BS_merged_sorted_mdup_clip.bedGraph
outfile=HPNE_BS
chr=22
echo $chr
time ./mergeCounts.pl <(cut -f1,2,5,6 $file1 | grep -e "^chr$chr\s") <(cut
-f1,2,5,6 $file2 | grep -e "^chr$chr\s") chr$chr | gzip > ${outfile}_${chr}.txt.gz
```

```
#file1=file1.txt
#file2=file2.txt
#outfile=test
for chr in {1..22} X Y
do
    echo $chr
    time ./mergeCounts.pl <(cut -f1,2,5,6 $file1 | grep -e "^chr$chr\s") <(cut
-f1,2,5,6 $file2 | grep -e "^chr$chr\s") chr$chr | gzip > ${outfile}_${chr}.txt.gz
done
```

```
#create set of "common sites".
#sites that have at least 4 reads in all samples
ls conversionCounts/JD_BS_*.txt.gz
zcat conversionCounts/JD_BS_*.txt.gz | ./filterSitesByCount.pl 4 >|
commonSites/common4_JD_BS.txt
zcat conversionCounts/HPNE_BS_*.txt.gz | ./filterSitesByCount.pl 4 >|
commonSites/common4_HPNE_BS.txt
zcat conversionCounts/JD_OxBS_*.txt.gz | ./filterSitesByCount.pl 4 >|
commonSites/common4_JD_OxBS.txt
zcat conversionCounts/HPNE_OxBS_*.txt.gz | ./filterSitesByCount.pl 4 >|
commonSites/common4_HPNE_OxBS.txt
```

```
#use my own computer to do the sorting
time sort --parallel=6 -T tmp commonSites/common4_JD_BS.txt >|
commonSites/sorted_common4_JD_BS.txt
time sort --parallel=6 -T tmp commonSites/common4_HPNE_BS.txt >|
commonSites/sorted_common4_HPNE_BS.txt
time sort --parallel=6 -T tmp commonSites/common4_JD_OxBS.txt >|
commonSites/sorted_common4_JD_OxBS.txt
time sort --parallel=6 -T tmp commonSites/common4_HPNE_OxBS.txt >|
commonSites/sorted_common4_HPNE_OxBS.txt
```

```
#join all the files, retaining only those present in all
cd commonSites
time join -t# sorted_common4_JD_OxBS.txt <(join -t# sorted_common4_JD_BS.txt <(join
-t# sorted_common4_HPNE_BS.txt sorted_common4_HPNE_OxBS.txt)) >| common4.txt
```

```
#get the common sites only looking at a single sample
cd commonSites
time join -t# sorted_common4_JD_OxBS.txt sorted_common4_JD_BS.txt >|
common4_JD.txt&
time join -t# sorted_common4_HPNE_OxBS.txt sorted_common4_HPNE_BS.txt >|
common4_HPNE.txt&
```

```
#$ wc -l common4.txt
#527710019 common4.txt
```

```
#now lets filter away the hmcSites that aren't common.
```

```
#1. sort hmcSites by chr pos alphabetically
```

```
#2. join with commons sites
```

```
time join -t# ../commonSites/common4.txt <(tail -n +2 hmcSites_HPNE_all.txt | sort  
-k 1,2 | sed 's/\(\w*\w*\w*\)\(.*\)/\1#\2/' ) >| common4_hmcSites_HPNE.txt
```

```
time join -t# ../commonSites/common4.txt <(tail -n +2 hmcSites_JD_all.txt | sort -k  
1,2 | sed 's/\(\w*\w*\w*\)\(.*\)/\1#\2/' ) >| common4_hmcSites_JD.txt
```

```
#wc -l common4_hmcSites_*
```

```
# 4657389 common4_hmcSites_HPNE.txt
```

```
# 6067629 common4_hmcSites_JD.txt
```

```
# 10725018 total
```

```
#####
```

```
#scratch
```

```
time join -t# ../commonSites/common4.txt <(head ../commonSites/common4.txt )
```

```
time join -t# ../commonSites/common4.txt <(tail -n +2 hmcSites_HPNE_all.txt | head  
-5000 | sed 's/\(\w*\w*\w*\)\(.*\)/\1#\2/' | sort -k 1 -t#)
```

```
time join -t# ../commonSites/common4.txt <(tail -n +2 hmcSites_HPNE_all.txt | grep  
-e "chr10" | head -5000 | sed 's/\(\w*\w*\w*\)\(.*\)/\1#\2/' | sort -k 1 -t#)
```

```
tail -n +2 hmcSites_HPNE_all.txt | grep -e "chr10" | sed 's/\(\w*\w*\w*\)\(  
.*\)/\1#\2/' | sort -k 1 -t# >| test1.txt
```

```
tail -n +2 hmcSites_HPNE_all.txt | grep -e "chr10" | sort -k 1,2 >| test1a.txt
```

```
tail -n +2 hmcSites_HPNE_all.txt | grep -e "chr10" | sort -k 1,2 | sed 's/  
(\w*\w*\w*)\(.*)/\1#\2/' >| test1b.txt
```

```
join -t# ../commonSites/common4.txt test1.txt > test2.txt
```

```
#sort by chr then pos numerically
```

```
==> ./sanchari/j432_j446/examineFixedOxbs.r <==
```

```
library("VariantAnnotation")
```

```
library(TxDb.Hsapiens.UCSC.hg19.knownGene)
```

```
txdb_hg19 <- TxDb.Hsapiens.UCSC.hg19.knownGene
```

```
#1. Want to look at the methylation percentages of
```

```
#the jd and hpne samples at cpG sites.
```

```
#amit said the meth percentages looked a little high
```

```
#for the jd sample(over half had 100%)
```

```
#the mc histograms of the hmcSites should be high
```

```
#in the BS sample, and low in the OxBS sample
```

```
options(stringsAsFactors=F)
```

```

#load in the merged data
x = read.table("hmcSites_fixed2/cpg/hmcSites_BOTH_all_cpg_common4.txt")

colnames(x) = c("chr", "pos",
               "jd.bs.meth", "jd.bs.tot", "jd.oxbs.meth", "jd.oxbs.tot", "jd.or", "jd.pval",
               "hpne.bs.meth", "hpne.bs.tot", "hpne.oxbs.meth", "hpne.oxbs.tot", "hpne.or",
               "hpne.pval"
               )

head(x)
tail(x)
dim(x)
mean(x$jd.bs.tot)
mean(x$jd.oxbs.tot)
mean(x$hpne.bs.tot)
mean(x$hpne.oxbs.tot)

#for jd and hpne
#how many sites have at least 4 reads
#amongst those sites, what is avearge depth?

#try to get measures of overall methylation between samples
#what percentage of cpg sites have methylation less than 50%
ix.jd.lt50 = (x[,"jd.oxbs.meth"]/x[,"jd.oxbs.tot"] <= .50)
ix.hpne.lt50 = (x[,"hpne.oxbs.meth"]/x[,"hpne.oxbs.tot"] <= .50)
mean(x[,"jd.oxbs.meth"]/x[,"jd.oxbs.tot"] <= .50)
mean(x[,"hpne.oxbs.meth"]/x[,"hpne.oxbs.tot"] <= .50)

#what percentage of cpg sites have methylation greater than 50%
ix.jd.gt50 = (x[,"jd.oxbs.meth"]/x[,"jd.oxbs.tot"] > .50)
ix.hpne.gt50 = (x[,"hpne.oxbs.meth"]/x[,"hpne.oxbs.tot"] > .50)
mean(x[,"jd.oxbs.meth"]/x[,"jd.oxbs.tot"] > .50)
mean(x[,"hpne.oxbs.meth"]/x[,"hpne.oxbs.tot"] > .50)

#what percentage of cpg sites have total methylation
ix.jd.100 = (x[,"jd.oxbs.meth"]/x[,"jd.oxbs.tot"] == 1)
ix.hpne.100 = (x[,"hpne.oxbs.meth"]/x[,"hpne.oxbs.tot"] == 1)
mean(ix.jd.100)
mean(ix.hpne.100)

mean(x[,"jd.pval"] < 0.05)
mean(x[,"hpne.pval"] < 0.05)

#get indices of the signif hmc sites
jd.hmc.ix = which(x[,"jd.pval"] < 0.05)
hpne.hmc.ix = which(x[,"hpne.pval"] < 0.05)

length(jd.hmc.ix) / nrow(x)
length(hpne.hmc.ix) / nrow(x)
length(jd.hmc.ix)
length(hpne.hmc.ix)

```

```

#write the site lists
write.table(x[jd.hmc.ix,1:2], file="jd_hmc_p05.txt", col.names=F, row.names=F,
quote=F, sep="\t")
write.table(x[hpne.hmc.ix,1:2], file="hpne_hmc_p05.txt", col.names=F, row.names=F,
quote=F, sep="\t")

write.table(x[ix.jd.gt50,1:2], file="jd_mc_gt50.txt", col.names=F, row.names=F,
quote=F, sep="\t")
write.table(x[ix.hpne.gt50,1:2], file="hpne_mc_gt50.txt", col.names=F, row.names=F,
quote=F, sep="\t")

write.table(x[ix.jd.lt50,1:2], file="jd_mc_lt50.txt", col.names=F, row.names=F,
quote=F, sep="\t")
write.table(x[ix.hpne.lt50,1:2], file="hpne_mc_lt50.txt", col.names=F, row.names=F,
quote=F, sep="\t")

write.table(x[ix.jd.100,1:2], file="jd_mc_100.txt", col.names=F, row.names=F,
quote=F, sep="\t")
write.table(x[ix.hpne.100,1:2], file="hpne_mc_100.txt", col.names=F, row.names=F,
quote=F, sep="\t")

#get percentage of sites that lie within exons introns promoters etc
getSiteCounts <- function(x){
  input = GRanges(seqnames=x[,1], ranges=IRanges(x[,2], x[,2]+1), strand="*")
  loc_hg19 <- locateVariants(input, txdb_hg19, AllVariants())
  loc_hg19 = loc_hg19[!duplicated(loc_hg19)]
  table(loc_hg19$LOCATION)
}

sCounts.jd.hmc = getSiteCounts(x[jd.hmc.ix,])
sCounts.hpne.hmc = getSiteCounts(x[hpne.hmc.ix,])

sCounts.jd.hmc
sCounts.hpne.hmc

sCounts.jd.hmc/sum(sCounts.jd.hmc)
sCounts.hpne.hmc/sum(sCounts.hpne.hmc)

#meth > 50%
sCounts.jd.mc = getSiteCounts(x[ix.jd.gt50,])
sCounts.hpne.mc = getSiteCounts(x[ix.hpne.gt50,])
sCounts.jd.mc
sCounts.hpne.mc
sCounts.jd.mc/sum(sCounts.jd.mc)
sCounts.hpne.mc/sum(sCounts.hpne.mc)

#histograms of methylation across samples
png("methPerc_allCpg.png")
par(mfcol=c(2,2))

```

```

hist(x[, "jd.bs.meth"]/x[, "jd.bs.tot"], 100,          main="all cpg\njd bs meth %"
)
hist(x[, "jd.oxbs.meth"]/x[, "jd.oxbs.tot"], 100,     main="all cpg\njd oxbs meth %"
)
hist(x[, "hpne.bs.meth"]/x[, "hpne.bs.tot"], 100,     main="all cpg\nhpne bs meth %"
)
hist(x[, "hpne.oxbs.meth"]/x[, "hpne.oxbs.tot"], 100, main="all cpg\nhpne oxbs meth
%")
dev.off()

```

```

png("methPerc_hmcCpg.png")
par(mfcol=c(2,2))
hist(x[jd.hmc.ix, "jd.bs.meth"]/x[jd.hmc.ix, "jd.bs.tot"], 100          ,
main="hmc cpg\njd bs meth %" )
hist(x[jd.hmc.ix, "jd.oxbs.meth"]/x[jd.hmc.ix, "jd.oxbs.tot"], 100      ,
main="hmc cpg\njd oxbs meth %" )
hist(x[hpne.hmc.ix, "hpne.bs.meth"]/x[hpne.hmc.ix, "hpne.bs.tot"], 100    ,
main="hmc cpg\nhpne bs meth %" )
hist(x[hpne.hmc.ix, "hpne.oxbs.meth"]/x[hpne.hmc.ix, "hpne.oxbs.tot"], 100,
main="hmc cpg\nhpne oxbs meth %")
dev.off()

```

```

#get hydroxy meth percentages in and out of hmcsites
#hmc% is meth% bs - meth% oxbs

```

```

jd.hmcPerc = x[, "jd.bs.meth"]/x[, "jd.bs.tot"] -
x[, "jd.oxbs.meth"]/x[, "jd.oxbs.tot"]
jd.hmcPerc.hmcSites = x[jd.hmc.ix, "jd.bs.meth"]/x[jd.hmc.ix, "jd.bs.tot"] -
x[jd.hmc.ix, "jd.oxbs.meth"]/x[jd.hmc.ix, "jd.oxbs.tot"]
hpne.hmcPerc = x[, "hpne.bs.meth"]/x[, "hpne.bs.tot"] -
x[, "hpne.oxbs.meth"]/x[, "hpne.oxbs.tot"]
hpne.hmcPerc.hmcSites = x[hpne.hmc.ix, "hpne.bs.meth"]/x[hpne.hmc.ix, "hpne.bs.tot"]
- x[hpne.hmc.ix, "hpne.oxbs.meth"]/x[hpne.hmc.ix, "hpne.oxbs.tot"]

```

```

#how many sites with hmc > 50%?
mean(jd.hmcPerc > .50)
mean(hpne.hmcPerc > .50)
mean(x[, "jd.pval"] < 0.05)
mean(x[, "jd.pval"] < 0.01)

```

```

sum(jd.hmcPerc > 0 )
sum(jd.hmcPerc < 0 )
length(jd.hmc.ix)

```

```

jd.mcPerc.hmcSites

```

```

png("hmcPerc_cpg.png", 1000, 1000)
par(mfcol=c(2,2))
hist(jd.hmcPerc, 100)
hist(jd.hmcPerc.hmcSites, 100)
hist(hpne.hmcPerc, 100)
hist(hpne.hmcPerc.hmcSites, 100)
dev.off()

```

```

#overlay histograms of MC percentages

```

```

#with HMC percentages (of significant sites)

jd.mcPerc = x[,"jd.oxbs.meth"]/x[,"jd.oxbs.tot"]
hpne.mcPerc = x[,"hpne.oxbs.meth"]/x[,"hpne.oxbs.tot"]
jd.mcPerc.hmcSites = x[jd.hmc.ix,"jd.oxbs.meth"]/x[jd.hmc.ix,"jd.oxbs.tot"]
hpne.mcPerc.hmcSites =
x[hpne.hmc.ix,"hpne.oxbs.meth"]/x[hpne.hmc.ix,"hpne.oxbs.tot"]

mean(jd.mcPerc)
sd(jd.mcPerc)
mean(hpne.mcPerc)
sd(hpne.mcPerc)

mean(jd.hmcPerc.hmcSites)
sd(jd.hmcPerc.hmcSites)
mean(hpne.hmcPerc.hmcSites)
sd(hpne.hmcPerc.hmcSites)

#examine the effect of smoothing on density plots
png("test1.png")
par(mfcol=c(3, 1))
plot(density(jd.mcPerc), col="red")
lines(density(jd.hmcPerc.hmcSites), col="blue")

plot(density(jd.mcPerc), col="red", ylim=c(0, 4))
lines(density(jd.hmcPerc.hmcSites), col="blue")

plot(density(jd.mcPerc, width=0.1),ylim=c(0, 4), col="red")
lines(density(jd.hmcPerc.hmcSites, width=0.1), col="blue")
dev.off()

png("jd_histMCHmc_smooth.png")
plot(density(jd.mcPerc, width=0.1), ylim=c(0, 4), col="red", main="Methylation
Percentage Densities: JD", xlab="Methylation Percentage")
lines(density(jd.hmcPerc.hmcSites, width=0.1), col="blue")
legend("topleft", c("MC", "HMC"), pch=16, col=c("red", "blue"))
dev.off()

png("hpne_histMCHmc_smooth.png")
plot(density(hpne.mcPerc, width=0.1), ylim=c(0, 4), col="red", main="Methylation
Percentage Densities: HPNE", xlab="Methylation Percentage")
lines(density(hpne.hmcPerc.hmcSites, width=0.1), col="blue")
legend("topleft", c("MC", "HMC"), pch=16, col=c("red", "blue"))
dev.off()

png("hists_McPerc_smooth.png")
plot(density(jd.mcPerc, width=0.1), col="red", main="MC Percentage Densities",
xlab="Methylation Percentage")
lines(density(hpne.mcPerc, width=.1), col="blue")
legend("topleft", c("JD", "HPNE"), pch=16, col=c("red", "blue"))
dev.off()

png("hists_HmcPerc_smooth.png")
plot(density(jd.hmcPerc.hmcSites, width=0.10), col="red", ylim=c(0, 4), main="HMC
Percentage Densities", xlab="Hydroxy-Methylation Percentage")

```



```
lines(density(hpne.hmcPerc.hmcSites, width=.10), col="blue")
legend("topleft", c("JD", "HPNE"), pch=16, col=c("red", "blue"))
dev.off()
```

```
#JD
png("jd_histMchMc.png")
#methylation histogram over all cpG sites
hist.mc = hist(x[, "jd.oxbs.meth"]/x[, "jd.oxbs.tot"], plot=F, 100)
#hmc histogram over all significant cpG sites
hist.hmc.sig = hist(jd.hmcPerc.hmcSites, plot=F, 100)
xlim <- range(hist.mc$breaks, hist.hmc.sig$breaks)
ylim <- range(0, hist.mc$density, hist.hmc.sig$density)
## plot the first graph
plot(hist.mc, xlim = xlim, ylim = ylim,
      col = rgb(1,0,0,0.4), xlab = 'Lengths',
      freq = FALSE, ## relative, not absolute frequency
      main = 'JD: Methylation')
## plot the second graph on top of this
opar <- par(new = FALSE)
plot(hist.hmc.sig, xlim = xlim, ylim = ylim,
      xaxt = 'n', yaxt = 'n', ## don't add axes
      col = rgb(0,0,1,0.4), add = TRUE,
      freq = FALSE) ## relative, not absolute frequency
## add a legend in the corner
legend('topleft', c('MC', 'HMC'),
      fill = rgb(1:0,0,0:1,0.4), bty = 'n',
      border = NA)
par(opar)
dev.off()
```

```
#HPNE
png("hpne_histMchMc.png")
#methylation histogram over all cpG sites
hist.mc = hist(x[, "hpne.oxbs.meth"]/x[, "hpne.oxbs.tot"], plot=F, 100)
#hmc histogram over all significant cpG sites
hist.hmc.sig = hist(hpne.hmcPerc.hmcSites, plot=F, 100)
xlim <- range(hist.mc$breaks, hist.hmc.sig$breaks)
ylim <- range(0, hist.mc$density, hist.hmc.sig$density)
## plot the first graph
plot(hist.mc, xlim = xlim, ylim = ylim,
      col = rgb(1,0,0,0.4), xlab = 'Lengths',
      freq = FALSE, ## relative, not absolute frequency
      main = 'HPNE: Methylation')
## plot the second graph on top of this
opar <- par(new = FALSE)
plot(hist.hmc.sig, xlim = xlim, ylim = ylim,
      xaxt = 'n', yaxt = 'n', ## don't add axes
      col = rgb(0,0,1,0.4), add = TRUE,
      freq = FALSE) ## relative, not absolute frequency
## add a legend in the corner
legend('topleft', c('MC', 'HMC'),
      fill = rgb(1:0,0,0:1,0.4), bty = 'n',
      border = NA)
par(opar)
dev.off()
```

```

#overlay hmc jd and hpne
png("hists_HmcPerc.png")
hist.hmc.jd= hist(jd.hmcPerc.hmcSites, plot=F, 100)
hist.hmc.hpne= hist(hpne.hmcPerc.hmcSites, plot=F, 100)
xlim <- range(hist.hmc.jd$breaks,hist.hmc.hpne$breaks)
ylim <- range(0,hist.hmc.jd$density, hist.hmc.hpne$density)
## plot the first graph
plot(hist.hmc.jd,xlim = xlim, ylim = ylim,
      col = rgb(1,0,0,0.4),xlab = 'Lengths',
      freq = FALSE, ## relative, not absolute frequency
      main = 'HMC: JD, HPNE')
## plot the second graph on top of this
opar <- par(new = FALSE)
plot(hist.hmc.hpne,xlim = xlim, ylim = ylim,
      xaxt = 'n', yaxt = 'n', ## don't add axes
      col = rgb(0,0,1,0.4), add = TRUE,
      freq = FALSE) ## relative, not absolute frequency
## add a legend in the corner
legend('topleft',c('JD','HPNE'),
      fill = rgb(1:0,0,0:1,0.4), bty = 'n',
      border = NA)
par(opar)
dev.off()

```

```

#overlay mc: jd, hpne
png("hists_McPerc.png")
hist.mc.jd = hist(x[,"jd.oxbs.meth"]/x[,"jd.oxbs.tot"], plot=F, 100 )
hist.mc.hpne = hist(x[,"hpne.oxbs.meth"]/x[,"hpne.oxbs.tot"], plot=F, 100)
xlim <- range(hist.mc.jd$breaks,hist.mc.hpne$breaks)
ylim <- range(0,hist.mc.jd$density, hist.mc.hpne$density)
## plot the first graph
plot(hist.mc.jd,xlim = xlim, ylim = ylim,
      col = rgb(1,0,0,0.4),xlab = 'Lengths',
      freq = FALSE, ## relative, not absolute frequency
      main = 'MC: JD, HPNE')
## plot the second graph on top of this
opar <- par(new = FALSE)
plot(hist.mc.hpne,xlim = xlim, ylim = ylim,
      xaxt = 'n', yaxt = 'n', ## don't add axes
      col = rgb(0,0,1,0.4), add = TRUE,
      freq = FALSE) ## relative, not absolute frequency
## add a legend in the corner
legend('topleft',c('JD','HPNE'),
      fill = rgb(1:0,0,0:1,0.4), bty = 'n',
      border = NA)
par(opar)
dev.off()

```

```

# there are a total of 27,999,538 cpg sites in genome
# we have data for 11,296,328 of them

#brd promoter region
#look at hmc on chr19 between these points
p1 = 15391262 - 1500
p2 = 15443342 + 1500
head(x)
x.19 = x[x[,1] == "chr19",]
ix.brd4 = which((x.19$pos >= p1) & (x.19$pos < p2))
length(ix.brd4)
#plot out mc and hmc over this region
x.brd4 = x.19[ix.brd4,]
head(x.brd4)
jd.mc = x.brd4$jd.oxbs.meth/x.brd4$jd.oxbs.tot
jd.hmc = x.brd4[,"jd.bs.meth"]/x.brd4[,"jd.bs.tot"] -
x.brd4[,"jd.oxbs.meth"]/x.brd4[,"jd.oxbs.tot"]
hpne.mc = x.brd4$hpne.oxbs.meth/x.brd4$hpne.oxbs.tot
hpne.hmc = x.brd4[,"hpne.bs.meth"]/x.brd4[,"hpne.bs.tot"] -
x.brd4[,"hpne.oxbs.meth"]/x.brd4[,"hpne.oxbs.tot"]
hmc
stem(hmc)

#draw the less confidence dots with transparency
blues = sapply(1:100, function(i){
  rgb(0,0,1,i/100.0)
})
jd.hmc.cols =blues[101 - round(x.brd4$jd.pval, 2)*100]
hpne.hmc.cols =blues[101 - round(x.brd4$hpne.pval, 2)*100]

reds = sapply(1:100, function(i){
  rgb(1,0,0,i/100.0)
})
#more reads -> more confidences
n = max(x.brd4$jd.oxbs.tot)
jd.mc.cols = reds[round(x.brd4$jd.oxbs.tot / n * 100)]
hpne.mc.cols = reds[round(x.brd4$hpne.oxbs.tot / n * 100)]

png("jd_brd4_mc_hmc_conf.png")
plot(x.brd4$pos, jd.hmc, col=jd.hmc.cols, ylim=c(-1, 1), ylab="methylation")
points(x.brd4$pos, jd.mc, col=jd.mc.cols)
dev.off()

png("hpne_brd4_mc_hmc_conf.png")
plot(x.brd4$pos, hpne.hmc, col=hpne.hmc.cols, ylim=c(-1, 1), ylab="methylation")
points(x.brd4$pos, hpne.mc, col=hpne.mc.cols)
dev.off()

png("jd_brd4_mc_hmc.png")
plot(x.brd4$pos, hmc, col="blue", ylim=c(-1, 1), ylab="methylation")
points(x.brd4$pos, mc, col="red")
dev.off()

x11()
plot(x.brd4$pos, hpne.hmc, col="blue", ylim=c(-1, 1), ylab="methylation")
points(x.brd4$pos, hpne.mc, col="red")

```

```

plot(x.brd4$pos, ylim=c(-1, 1), xlim=c(min(x.brd4$pos), max(x.brd4$pos)))
segments(x0=x.brd4$pos, y0=x.brd4$pos*0, y1=mc, col="red")
segments(x0=x.brd4$pos, y0=x.brd4$pos*0, y1=hmc, col="blue")

#find places where methylation is significantly different between
#hpne and jd
diffmeth.pvals = NA*numeric(nrow(x))
diffmeth.or = NA*numeric(nrow(x))
for (i in 1:nrow(x)){
  if (i %% 10000 == 0){
    print(i)
  }

  #a = 10
  #b = 20
  #c = 30
  #d = 40
  a = x[i,"jd.bs.meth"] #num converted reads
  b = x[i,"jd.bs.tot"] - a #num of converted reads
  c = x[i,"hpne.bs.meth"]
  d = x[i,"hpne.bs.tot"] - c

  #see if there's a significant different in the ratios
  #of methylated reads between jd and hpne
  res = fisher.test(matrix(c(a, b ,c, d), ncol=2))
  p = res$p.value
  est = res$estimate
  meth.pvals[i] = p
  meth.or[i] =est
}

save.image("work_diffMeth.rData")
qvals = p.adjust(meth.pvals)

ix.sig = qvals < 0.05

#is this hmc loss and gain?
#more meth in JD, sig hmc in HPNE
sum(ix.sig & meth.or > 1 & x[,"hpne.pval"] < 0.05)
head(x[ix.sig & meth.or > 1 & x[,"hpne.pval"] < 0.05,])

#more meth in hpne, sig hmc in JD
sum(ix.sig & meth.or < 1 & x[,"jd.pval"] < 0.05)
x[ix.sig & meth.or < 1 & x[,"jd.pval"] < 0.05,]

#collect the four sets
#sites with significant HMC in JD
#sites with significant HMC in HPNE
#sites with significantly more MC in JD than HPNE

```

```

#sites with significantly more MC in HPNE than JD

#get site distributions for these four sets
sum(x[, "jd.pval"] < 0.05)
sum(x[, "jd.pval"] < 0.01)
sum(x[, "hpne.pval"] < 0.01)
sum(x[, "hpne.pval"] < 0.05)

png("methSigDiff_hist.png")
par(mfcol=c(2,1))
hist(log(meth.or), 1000)
hist(log(meth.or[qvals < 0.2]), 1000)
dev.off()

qvals = p.adjust(meth.pvals)
sum(meth.or < 1 & qvals < 0.2)
sum(meth.or > 1 & qvals < 0.2)
sum(qvals < 0.2)
ix = meth.or > 1 & qvals < 0.2
head(x[ix,])

jd.mc.sites = x[meth.or > 1 & qvals < 0.2,1:2]
hpne.mc.sites = x[meth.or < 1 & qvals < 0.2,1:2]
jd.hmc.sites = x[(x[, "jd.or"] > 1) & (x[, "jd.pval"] < 0.05),1:2]
hpne.hmc.sites = x[(x[, "hpne.or"] > 1) & (x[, "hpne.pval"] < 0.05),1:2]
dim(jd.mc.sites)
dim(hpne.mc.sites)
dim(jd.hmc.sites)
dim(hpne.hmc.sites)

write.table(file="sites_fixed2_jdMc.txt", jd.mc.sites, col.names=F, row.names=F,
quote=F, sep="\t")
write.table(file="sites_fixed2_hpneMc.txt", hpne.mc.sites, col.names=F,
row.names=F, quote=F, sep="\t")
write.table(file="sites_fixed2_jdHmc_p05.txt", jd.hmc.sites, col.names=F,
row.names=F, quote=F, sep="\t")
write.table(file="sites_fixed2_hpneHmc_p05.txt", hpne.hmc.sites, col.names=F,
row.names=F, quote=F, sep="\t")

#what if we only look at the sites with significant meth
x[, "jd.meth"]

i = 1

a = x[i, "jd.bs.meth"]
b = x[i, "jd.bs.tot"] - a
c = x[i, "hpne.bs.meth"]
d = x[i, "hpne.bs.tot"] - c

matrix(c(a,b,c,d), 2)

ix = which((qvals < 0.05) & (x[, "jd.pval"] < 0.05))
a = x[ix, "jd.pval"]
b = p.adjust(a)

```

```

c = which(b < 0.05)
x[ix[c],]
which(p.adjust(x[(meth.pvals < 0.05) & (x[,"jd.pval"] < 0.05), "jd.pval"]) < 0.05)
x[c(19880, 24423),]
sum((meth.pvals > 0.05) & (x[,"jd.pval"] < 0.05))
sum((qvals >= 0.05) & (x[,"jd.pval"] < 0.05))

sum((qvals < 0.05) & (x[qvals < 0.05,"hpne.pval"] < 0.05))
q1 = p.adjust(x[qvals < 0.05,"hpne.pval"])
sum(q1 < 0.15)

sum(meth.pvals < 0.05)
fisher.test(

```

```
#####
```

```
##scratch
```

```
#view the histograms of odds ratios.
```

```
#write out the places with significant difference between jd and hpne
```

```
n = 320000
```

```
hist(meth.pvals, 100)
```

```
hist(meth.pvals, 100)
```

```
hist(log(meth.or[meth.or != 1]), 1000)
```

```
hist(log(meth.or[meth.or != 1]), 100)
```

```
hist(log(meth.or[1:n][meth.or[1:n] != 1]), 1000)
```

```
hist(log(meth.or[1:n][meth.or[1:n] != 1]), 100)
```

```
sum(meth.pvals[1:n] < 0.05, na.rm=T)
```

```
qvals = p.adjust(meth.pvals)
```

```
mean(qvals < 0.05)
```

```
sum(qvals < 0.05)
```

```
hist(log(meth.or[qvals < 0.05]), 100)
```

```
ix = which(qvals < 0.05)
```

```
length(ix)
```

```
x[ix,]
```

```
==> ./sanchari/j432_j446/hmcSites/mergeSites.sh <==
```

```
#add the header to the merged file
```

```
head -1 hmcSites_HPNE_22.txt >| hmcSites_HPNE_all.txt
```

```
head -1 hmcSites_JD_22.txt >| hmcSites_JD_all.txt
```

```
for chr in {1..22} X Y
```

```
do
```

```
  echo $chr
```

```
  #process the HPNE files
```

```
  echo `ls *hmcSites_HPNE_${chr}.txt`
```

```
  file=`ls *hmcSites_HPNE_${chr}.txt`
```

```
  if echo $file | grep -e "stream"; then
```

```
    cat $file >> hmcSites_HPNE_all.txt
```

```
  else
```

```
    echo "nostream"
```

```

        #skip the first line and take out quotations
        tail -n +2 $file | sed 's/"//g' >> hmcSites_HPNE_all.txt
    fi
    #process the JD files
    echo `ls *hmcSites_JD_${chr}.txt`
    file=`ls *hmcSites_JD_${chr}.txt`
    if echo $file | grep -e "stream"; then
        cat $file >> hmcSites_JD_all.txt
    else
        echo "nostream"
        #skip the first line and take out quotations
        tail -n +2 $file | sed 's/"//g' >> hmcSites_JD_all.txt
    fi
done

```

==> ./sanchari/j432\_j446/hmcSites/getDiffSites.sh <==

```

#get the sites in JD but not in HPNE
comm -23 --check-order <(cut -f1-2 common4_hmcSites_JD.txt | sort) <(cut -f1-2
common4_hmcSites_HPNE.txt | sort) >| common4_hmcSites_JD-HPNE.txt
comm -13 --check-order <(cut -f1-2 common4_hmcSites_JD.txt | sort) <(cut -f1-2
common4_hmcSites_HPNE.txt | sort) >| common4_hmcSites_HPNE-JD.txt

```

==> ./sanchari/j432\_j446/mergeCounts.pl <==

```
#!/usr/bin/perl
```

```
use strict;
use warnings;
```

```
#load in the command line arguments
my ($bed1, $bed2, $chr) = @ARGV;
```

```
#print "file1: $bed1\n";
#print "file2: $bed2\n";
#print "chr: $chr\n";
```

```
#open file handles to each file
open my $in1, '<', $bed1 or die;
open my $in2, '<', $bed2 or die;
```

```
#read the first line in each file and init the fields
my ($chr1, $pos1, $nMeth1, $nTot1) = split ' ', <$in1>;
my ($chr2, $pos2, $nMeth2, $nTot2) = split ' ', <$in2>;
```

```
#print "$chr1, $pos1, $nMeth1, $nTot1\n";
#print "$chr2, $pos2, $nMeth2, $nTot2\n";
```

```
#keep going while there's still stuff
#being read by both files
while (!eof $in1 and !eof $in2){
    #same position

```

```

#add counts from both lines
#move both file handles up one
if ($pos1 == $pos2){
    print "$chr1\t$pos1\t".($nMeth1+$nMeth2)."\t".($nTot1+$nTot2)."\n";
    ($chr1, $pos1, $nMeth1, $nTot1) = split ' ', <$in1>;
    ($chr2, $pos2, $nMeth2, $nTot2) = split ' ', <$in2>;
}
elseif ($pos1 > $pos2){
    #print 2nd file, move it's handle up one
    print "$chr2\t$pos2\t$nMeth2\t$nTot2\n";
    ($chr2, $pos2, $nMeth2, $nTot2) = split ' ', <$in2>;
}
elseif ($pos2 > $pos1){
    #print 1st file, move it's handle up one
    print "$chr1\t$pos1\t$nMeth1\t$nTot1\n";
    ($chr1, $pos1, $nMeth1, $nTot1) = split ' ', <$in1>;
}
#print "1:".<$in1>;
#print "2:".<$in2>;
}

#one of the files finished, now write out the rest
if (eof $in1){
    while(<$in2>){
        print "$chr2\t$pos2\t$nMeth2\t$nTot2\n";
        ($chr2, $pos2, $nMeth2, $nTot2) = split ' ', <$in2>;
    }
}
else{
    while(<$in1>){
        print "$chr1\t$pos1\t$nMeth1\t$nTot1\n";
        ($chr1, $pos1, $nMeth1, $nTot1) = split ' ', <$in1>;
    }
}

==> ./sanchari/j432_j446/hmcSites_fixed2/runMerge.sh <==

for chr in Y {22..1} X
do
    echo $chr
    Rscript mergeSites.r $chr
done

==> ./sanchari/j432_j446/hmcSites_fixed2/cpg/countsToBedgraph.r <==
options(stringsAsFactors=F)

x = read.table("hmcSites_BOTH_all_cpg_common4.txt")
head(x)

colnames(x) = c("chr", "pos",
    "jd.bs.meth", "jd.bs.tot", "jd.oxbs.meth", "jd.oxbs.tot", "jd.or", "jd.pval",
    "hpne.bs.meth", "hpne.bs.tot", "hpne.oxbs.meth", "hpne.oxbs.tot", "hpne.or",
    "hpne.pval"
)

head(x)

```



```

#map the methylated reads to positive(blue)
#unmethylation reads to negative(red)

#do this for BS and OxBS

#positive methylated blue

descr="jd.bs"
col1="jd.bs.meth"
col2="jd.bs.tot"
#show raw counts of converted and non-converted reads
writeBedgraph_v1 <- function(descr, x, col1, col2){
  #turn off scientific notation
  options(scipen=999)

  ofile = paste0(descr, "_meth.bedGraph")
  trackinfo = paste0("track type=bedGraph name=\"",ofile,"\" visibility=full
color=0,0,255 altColor=255,255,255")
  x.meth = cbind(x[, "chr"], x[, "pos"], x[, "pos"]+1, x[, col1])
  write(trackinfo, file = ofile)
  write.table(file= ofile, x.meth, col.names=F, row.names=F, quote=F, sep="\t",
append=T)

  #negative non-methylation red
  ofile = paste0(descr, "_nometh.bedGraph")
  trackinfo = paste0("track type=bedGraph name=\"",ofile,"\" visibility=full
altColor=255,0,0 color=255,255,255")
  x.nometh = cbind(x[, "chr"], x[, "pos"], x[, "pos"]+1, -(x[, col2] - x[, col1]))
  write(trackinfo, file = ofile)
  write.table(file= ofile, x.nometh, col.names=F, row.names=F, quote=F,
sep="\t", append=T)
}

writeBedgraph_v1("jd.bs", x, "jd.bs.meth", "jd.bs.tot")
writeBedgraph_v1("jd.oxbs", x, "jd.oxbs.meth", "jd.oxbs.tot")
writeBedgraph_v1("hpne.bs", x, "hpne.bs.meth", "hpne.bs.tot")
writeBedgraph_v1("hpne.oxbs", x, "hpne.oxbs.meth", "hpne.oxbs.tot")

#now show the hmc and mc estimates as a bedgraph
samp = "jd"
writeBedgraph_v2 <- function(samp, x){
  #separate mc/hmc into two graphs

  #ratio of meth reads to total reads is estimate of methylation
  r.bs = x[,paste0(samp, ".bs.meth")] / x[,paste0(samp, ".bs.tot")]
  r.oxbs = x[,paste0(samp, ".oxbs.meth")] / x[,paste0(samp, ".oxbs.tot")]

  #hist(r.bs, 100)
  #hist(r.oxbs - r.bs, 100)

  #difference of BS ratio and OxBS ratio is estimate for hmc%

```

```

#shown in blue
ofile = paste0(samp, "_hmc.bedGraph")
trackinfo = paste0("track type=bedGraph name=\"", ofile, "\" visibility=full
color=0,0,255 altColor=255,255,255")
x.hmc = cbind(x[, "chr"], x[, "pos"], x[, "pos"]+1, r.bs - r.oxbs)
write(trackinfo, file = ofile)
write.table(file= ofile, x.hmc, col.names=F, row.names=F, quote=F, sep="\t",
append=T)

```

```

#ratio of oxBS is estimate for mc% shown in red
ofile = paste0(samp, "_mc.bedGraph")
trackinfo = paste0("track type=bedGraph name=\"", ofile, "\" visibility=full
altColor=255,0,0 color=255,255,255")
x.mc = cbind(x[, "chr"], x[, "pos"], x[, "pos"]+1, -r.oxbs)
write(trackinfo, file = ofile)
write.table(file= ofile, x.mc, col.names=F, row.names=F, quote=F, sep="\t",
append=T)

```

```

}

```

```

writeBedgraph_v2("jd", x)
writeBedgraph_v2("hpne", x)

```

```

#take a look at chr19, 15391500 - 15391600
x.19 = x[x[, "chr"] == "chr19",]

```

```

ix = (x.19[, "pos"] > 15391500) & (x.19[, "pos"] < 15391600)
x.19[ix,]

```

```

trackinfo = paste0("track type=bedGraph name=\"", bname, "\" visibility=full
color=0,0,255 altColor=255,255,255")
head(x[, c("chr", "pos", "jd.bs.meth")])

```

```

#negative non-methylation red
trackinfo = paste0("track type=bedGraph name=\"", bname, "\" visibility=full
altColor=255,0,0 color=255,255,255")

```

```

head(cbind(x[, c("chr", "pos")], -(x[, "jd.bs.tot"] - x[, "jd.bs.meth"])))

```

```

head(x)

```

```

==> ./sanchari/j432_j446/hmcSites_fixed2/cpg/mergeSites_cpg.r <==
options(stringsAsFactors=F)

```

```

COMMON_THRESH = 4
#combine the hpne and jd samples

```

```

jd.files = paste0("hmcSites_JD_", c(1:22, "X", "Y"), "_cpg.txt")
hpne.files = paste0("hmcSites_HPNE_", c(1:22, "X", "Y"), "_cpg.txt")
out.files = paste0("hmcSites_BOTH_", c(1:22, "X", "Y"), "_cpg_common",
COMMON_THRESH, ".txt")

```

```

for (i in 1:length(jd.files)){
  x.jd = read.table(jd.files[i])
  x.hpne = read.table(hpne.files[i])
  #head(x.jd)
  x.both = merge(x.jd, x.hpne, by=2)
  #head(x.both)

  #column names
  # chr
  # pos
  # #meth BS JD
  # #tot BS JD
  # #meth OXBS JD
  # #tot OXBS JD
  # odd ratio JD
  # fisher p-val JD
  # #meth BS HPNE
  # #tot BS HPNE
  # #meth OXBS HPNE
  # #tot OXBS HPNE
  # odd ratio HPNE
  # fisher p-val HPNE
  y = x.both[,c(2, 1, 3:8, 11:16)]
  head(y)
  # V1.x V2 V3.x V4.x V5.x V6.x V7.x V8.x V3.y V4.y V5.y V6.y V7.y V8.y
  #1 chr1 12264 3 3 0 1 Inf 0.25 1 1 3 3 NaN 1.0
  #2 chr1 12270 3 3 1 1 NaN 1.00 1 1 3 4 Inf 0.8
  #3 chr1 12277 3 3 1 1 NaN 1.00 0 1 4 4 0 1.0

  #the read counts for the four files
  col.ix = c(4, 6, 10, 12)
  #all four files must meet criteria
  row.ix = apply(y[,col.ix] >= COMMON_THRESH, MARGIN=1, all)

  #head(y[row.ix,])
  #dim(y[row.ix,])
  write.table(y[row.ix,], file=out.files[i], row.names=F, col.names=F, quote=F,
  sep="\t")
}

```

```

==> ./sanchari/j432_j446/hmcSites_fixed2/mergeSites.r <==
library("data.table")
options(stringsAsFactors=F)

#read the chrom from command line

```

```

args = commandArgs(trailingOnly=TRUE)

# test if there is at least one argument: if not, return an error
if (length(args)==0) {
  stop("One argument must be supplied (chrom)", call.=FALSE)
} else if (length(args)==1) {
  # default output file
  chrom = args[1]
}

COMMON_THRESH = 4
#combine the hpne and jd samples

jd.file = paste0("hmcSites_JD_",chrom, ".txt")
hpne.file = paste0("hmcSites_HPNE_",chrom, ".txt")
out.file = paste0("hmcSites_BOTH_",chrom, "_common", COMMON_THRESH, ".txt")

xdt.jd = data.table(read.table(jd.file), key="V2")
xdt.hpne = data.table(read.table(hpne.file), key="V2")
xdt.both = merge(xdt.jd, xdt.hpne, by="V2")

y = xdt.both[,c(2, 1, 3:8, 10:15), with=F]
col.ix = c(4, 6, 10, 12)
row.ix = apply(y[,col.ix, with=F] >= COMMON_THRESH, MARGIN=1, all)

write.table(y[row.ix,], file=out.file, row.names=F, col.names=F, quote=F, sep="\t")

#####3
#jd.files = paste0("hmcSites_JD_",c(1:22, "X", "Y"), ".txt")
#hpne.files = paste0("hmcSites_HPNE_",c(1:22, "X", "Y"), ".txt")
#out.files = paste0("hmcSites_BOTH_",c(1:22, "X", "Y"), "_common", COMMON_THRESH, ".txt")
#
#
#for (i in 1:length(jd.files)){
#  #data.table's should be able to handle the huge matrices
#  #x.jd = read.table(jd.files[i])
#  #x.hpne = read.table(hpne.files[i])
#  #x.both = merge(x.jd, x.hpne, by=2)
#  xdt.jd = data.table(read.table(jd.files[i]), key="V2")
#  xdt.hpne = data.table(read.table(hpne.files[i]), key="V2")
#  xdt.both = merge(xdt.jd, xdt.hpne, by="V2")
#  #dim(xdt.both)
#  #head(xdt.both)
#  #head(x.jd)
#  #head(x.both)
#
#  #column names
#  # chr
#  # pos
#  # #meth BS JD
#  # #tot BS JD
#  # #meth OXBS JD

```



```

options(stringsAsFactors=F)

#command line arguments
args = commandArgs(trailingOnly=TRUE)
f.bs = args[1]
f.oxbs = args[2]
f.hmc = args[3]
#f.bs = "conversionCounts/HPNE_BS_22.txt.gz"
#f.oxbs = "conversionCounts/HPNE_OxBS_22.txt.gz"
#f.hmc = "hmcSites_HPNE_22.txt"

print(f.bs)
print(f.oxbs)
print(f.hmc)

#BS
#c -> t
#5mc -> c
#5hmc -> c
#
#oxBS
#c -> t
#5mc -> c
#5hmc -> t

#we want to find the sites with hmc
#low conversion in BS
#high conversion in oxBS

#candidate sites should have
#conversion rate in Bs below 50%
#conversion rate in oxBs above 50%

#instead of loading everything in at once
#read and process line by line
con1 = pipe(paste0("zcat ", f.bs))
open(con1, "r")
con2 = pipe(paste0("zcat ", f.oxbs))
open(con2, "r")

#start the file pointer at the begining
x1 = read.table(textConnection(readLines(con1, n=1)))
x2 = read.table(textConnection(readLines(con2, n=1)))

#keep processing line by line until there's an error
try({while(T){
  #we should only be working with a single chrom
  if (x1[1,1] != x2[1,1]){
    break
  }

  #matching site, process and print
  if (x1[1,2] == x2[1,2]){
    x = merge(x1, x2, by.x=1, by.y=1)
    v = as.numeric(x[1, c("V3.x", "V4.x", "V3.y", "V4.y")])
    m = matrix((c(v[1], v[3], v[2]-v[1], v[4]-v[3])), ncol=2)
  }
}


```

```

        res = fisher.test(m)

        if (res$estimate < 1 && res$p.value < 0.05){
            cat(paste(c(as.character(x[1, -5]),
                c(odds=res$estimate,pval=res$p.value), "\n"), sep="", collapse="\t"), file=f.hmc,
                append=T)
        }
        #move both pointers up
        x1 = read.table(textConnection(readLines(con1, 1)))
        x2 = read.table(textConnection(readLines(con2, 1)))
    }else if(x1[1,2] < x2[1,2]){
        #move the bs file pointer up a spot
        x1 = read.table(textConnection(readLines(con1, 1)))
    }else if (x1[1,2] > x2[1,2]){
        #move the oxbs file pointer up a spot
        x2 = read.table(textConnection(readLines(con2, 1)))
    }
}}, silent=T)

close(con1)
close(con2)

```

```

==> ./sanchari/j432_j446/runFindMcSites.sh <==
#!/bin/bash
#$ -cwd
#$ -N findMcSites
#$ -j n
#$ -l h_vmem=1G
#$ -pe smp 1
#$ -S /bin/bash
#$ -m e
#$ -M kith.pradhan@einstein.yu.edu

#run the streaming r script that finds mc sites
#
#usage:
#qsub runFindMcSites.sh HPNE_BS_1.txt.gz HPNE_OxBS_1.txt.gz
#mcSites/stream_mcSites_HPNE_1.txt

BSFILE=$1
OXBSFILE=$2
OUTFILE=$3

module load R/3.3.0/gcc.4.4.7

echo $BSFILE
echo $OXBSFILE
echo $OUTFILE

./findMcSites_stream.r $BSFILE $OXBSFILE $OUTFILE

==> ./sanchari/j432_j446/findHmcSites.r <==
#!/usr/bin/env Rscript

options(stringsAsFactors=F)

```

```

#command line arguments
args = commandArgs(trailingOnly=TRUE)
f.bs = args[1]
f.oxbs = args[2]
f.hmc = args[3]
#f.bs = "conversionCounts/HPNE_BS_22.txt.gz"
#f.oxbs = "conversionCounts/HPNE_OxBS_22.txt.gz"
#f.hmc = "hmcSites_HPNE_22.txt"

print(f.bs)
print(f.oxbs)
print(f.hmc)

#BS
#C -> t
#5mc -> c
#5hmc -> c
#
#oxBS
#c -> t
#5mc -> c
#5hmc -> t

#we want to find the sites with hmc
#low conversion in BS
#high conversion in oxBS

#candidate sites should have
#conversion rate in Bs below 50%
#conversion rate in oxBs above 50%

#read in the count info from the gz files
print(paste0("loading bs: ", f.bs))
x1 = read.table(pipe(paste0("zcat ", f.bs)))
print(paste0("loading oxbs: ", f.oxbs))
x2 = read.table(pipe(paste0("zcat ", f.oxbs)))

#head(x1)
#merge the bs and oxbs together
print("merging bs/oxbs")
x = merge(x1, x2, by.x=2, by.y=2)

#for each position calculate probability that
#oxbs conversion is more than bs conversion
#these are the hmc sites

#store data like this will make access faster
vals = t(data.matrix(x[,c("V3.x", "V4.x", "V3.y", "V4.y")]))

print ("testing...")
t1 = Sys.time()
#res.sites = sapply(1:20000, function(i){
res.sites = sapply(1:nrow(x), function(i){
  if (i %% 1000 == 0){

```



```

        print(i)
    }
    v = vals[,i]
    #v = unlist(x[i,c("V3.x", "V4.x", "V3.y", "V4.y")])
    m = matrix((c(v[1], v[3], v[2]-v[1], v[4]-v[3])), ncol=2)

    res = fisher.test(m)
    c(odds=res$estimate,pval=res$p.val)
})
t2 = Sys.time()
t2 - t1
dim(res.sites)

#lets just look at the sites with pval < 0.05
#and where oxbs has more conversion than bs
ix = which((res.sites[1,] < 1) & (res.sites[2,] < 0.05))
res = cbind(x[ix, 2:1], x[ix,c("V3.x", "V4.x", "V3.y", "V4.y")], t(res.sites[,ix]))
print (paste0("writing: ", f.hmc))
write.table(x=res, file=f.hmc, row.names=F, sep="\t")

```

```

==> ./sanchari/j432_j446/filterSitesByCount.pl <==
#!/usr/bin/perl
#print the chromosomal locations that have at least k reads
#read a conversionCount file from stdin
#write locations to stdout
#usage:
# zcat HPNE_BS_3.txt.gz | ./filterSitesByCount.pl 4 > common4_HPNE_BS_3.txt
use strict;
use warnings;

```

```

my $k = 0;
if (scalar @ARGV > 0){
    $k = $ARGV[0];
    #print "k: $k\n";
}else{
    die "must supply read count threshold argument\n";
}

```

```

while(<STDIN>){
    #my $line = $_;
    my @vals = split;
    if ($vals[3] >= $k){
        #print $line;
        print "$vals[0]\t$val[1]\n";
    }
}

```

```

==> ./sanchari/j432_j446/hmcSites_fixed/cpg/mergeSites_cpg.r <==
options(stringsAsFactors=F)

```

```

COMMON_THRESH = 4
#combine the hpne and jd samples

```

```

jd.files = paste0("hmcSites_JD_",c(1:22, "X", "Y"), "_cpg.txt")
hpne.files = paste0("hmcSites_HPNE_",c(1:22, "X", "Y"), "_cpg.txt")
out.files = paste0("hmcSites_BOTH_",c(1:22, "X", "Y"), "_cpg_common",

```

```
COMMON_THRESH, ".txt")
```

```
for (i in 1:length(jd.files)){
  x.jd = read.table(jd.files[i])
  x.hpne = read.table(hpne.files[i])
  #head(x.jd)
  x.both = merge(x.jd, x.hpne, by=2)
  #head(x.both)

  #column names
  # chr
  # pos
  # #meth BS JD
  # #tot BS JD
  # #meth OXBS JD
  # #tot OXBS JD
  # odd ratio JD
  # fisher p-val JD
  # #meth BS HPNE
  # #tot BS HPNE
  # #meth OXBS HPNE
  # #tot OXBS HPNE
  # odd ratio HPNE
  # fisher p-val HPNE
  y = x.both[,c(2, 1, 3:8, 11:16)]
  head(y)
  # V1.x V2 V3.x V4.x V5.x V6.x V7.x V8.x V3.y V4.y V5.y V6.y V7.y V8.y
  #1 chr1 12264 3 3 0 1 Inf 0.25 1 1 3 3 NaN 1.0
  #2 chr1 12270 3 3 1 1 NaN 1.00 1 1 3 4 Inf 0.8
  #3 chr1 12277 3 3 1 1 NaN 1.00 0 1 4 4 0 1.0

  #the read counts for the four files
  col.ix = c(4, 6, 10, 12)
  #all four files must meet criteria
  row.ix = apply(y[,col.ix] >= COMMON_THRESH, MARGIN=1, all)

  #head(y[row.ix,])
  #dim(y[row.ix,])
  write.table(y[row.ix,], file=out.files[i], row.names=F, col.names=F, quote=F,
  sep="\t")
}
```

```
==> ./sanchari/j432_j446/hmcSites_fixed/cpg/examineSiteDistributions.r <==
library("VariantAnnotation")
```

```

library(TxDb.Hsapiens.UCSC.hg19.knownGene)
txdb_hg19 <- TxDb.Hsapiens.UCSC.hg19.knownGene

options(stringsAsFactors=F)

x = read.table("hmcSites_BOTH_all_cpg_common4.txt")

#look at the hmcsites with pval < 0.05
head(x)
png("jd_methylation_hist.png")
hist(x[,3]/x[,4], 100, xlab="methylation percentage")
dev.off()
mean(x[,3]/x[,4] > .50)
mean(x[,3]/x[,4] == 1)
dim(x)
#take the top 10000 with the most methylation

ix = order(x[,3]/x[,4], x[,4])
#ix.mc2 = tail(ix, 10000)
ix.mc = tail(ix, 100000)
head(x[ix,])
ix.mc = sort(sample(which(x[,3]/x[,4] > .50), 10000 ))

head(x[ix.mc,])
tail(x[ix.mc,])
y = x[ix.mc,1:2]
y[,3] = "+"
write.table(y, file="test1_jdmc_top100k.txt", col.names=F, row.names=F, sep="\t",
quote=F)

jd.hmc.ix = which(x[,8] < 0.01)
hpne.hmc.ix = which(x[,14] < 0.01)
length(jd.hmc.ix)
length(hpne.hmc.ix)

ov.hmc.ix = jd.hmc.ix %in% hpne.hmc.ix

sum(ov.hmc.ix)
head(x[jd.hmc.ix,])

y = x[jd.hmc.ix,1:2]
y[,3] = "+"
write.table(y, file="test1_jdhmc.txt", col.names=F, row.names=F, sep="\t", quote=F)

#write a set of random sites

jd.bad.ix = which(x[,8] > 0.91)
length(jd.bad.ix)
jd.bad.ix = sample(jd.bad.ix, length(jd.hmc.ix))
length(jd.bad.ix)
y = x[jd.bad.ix,1:2]
y[,3] = "+"
write.table(y, file="test1_jdbad.txt", col.names=F, row.names=F, sep="\t", quote=F)

```

```
#look at sites with high methylation
```

```
getSiteCounts <- function(x){  
  input = GRanges(seqnames=x[,1], ranges=IRanges(x[,2], x[,2]+1), strand="*")  
  loc_hg19 <- locateVariants(input, txdb_hg19, AllVariants())  
  loc_hg19 = loc_hg19[!duplicated(loc_hg19)]  
  table(loc_hg19$LOCATION)  
}
```

```
sCounts.1 = getSiteCounts(x[jd.hmc.ix,1:2])  
sCounts.1a = getSiteCounts(x[jd.bad.ix,1:2])  
sCounts.2 = getSiteCounts(x[hpne.hmc.ix,1:2])
```

```
barplot(sCounts.1)  
x11(); barplot(sCounts.1a)  
x11(); barplot(sCounts.2)
```

```
==> ./sanchari/j432_j446/hmcSites_fixed/mergeSites.r <==  
library("data.table")  
options(stringsAsFactors=F)
```

```
COMMON_THRESH = 4  
#combine the hpne and jd samples
```

```
jd.files = paste0("hmcSites_JD_",c(1:22, "X", "Y"), ".txt")  
hpne.files = paste0("hmcSites_HPNE_",c(1:22, "X", "Y"), ".txt")  
out.files = paste0("hmcSites_BOTH_",c(1:22, "X", "Y"), "_common", COMMON_THRESH,  
".txt")
```

```
for (i in 1:length(jd.files)){  
  #data.table's should be able to handle the huge matrices  
  x.jd = read.table(jd.files[i])  
  x.hpne = read.table(hpne.files[i])  
  x.both = merge(x.jd, x.hpne, by=2)  
  xdt.jd = data.table(read.table(jd.files[i]), key="V2")  
  xdt.hpne = data.table(read.table(hpne.files[i]), key="V2")  
  xdt.both = merge(xdt.jd, xdt.hpne, by="V2")  
  #head(x.jd)  
  #head(x.both)  
  
  #column names  
  # chr  
  # pos  
  # #meth BS JD  
  # #tot BS JD  
  # #meth OXBS JD  
  # #tot OXBS JD  
  # odd ratio JD  
  # fisher p-val JD  
  # #meth BS HPNE
```

```

# #tot BS HPNE
# #meth OXBS HPNE
# #tot OXBS HPNE
# odd ratio HPNE
# fisher p-val HPNE
head(x.both)
dim(x.both)

x.both[1:5, 2, with=F]
y = x.both[,c(2, 1, 3:8, 10:15), with=F]
y = x.both[,c(2, 1, 3:8, 10:15)]
head(y)
# V1.x V2 V3.x V4.x V5.x V6.x V7.x V8.x V3.y V4.y V5.y V6.y V7.y V8.y
#1 chr1 12264 3 3 0 1 Inf 0.25 1 1 3 3 NaN 1.0
#2 chr1 12270 3 3 1 1 NaN 1.00 1 1 3 4 Inf 0.8
#3 chr1 12277 3 3 1 1 NaN 1.00 0 1 4 4 0 1.0

#the read counts for the four files
col.ix = c(4, 6, 10, 12)
#all four files must meet criteria
row.ix = apply(y[,col.ix] >= COMMON_THRESH, MARGIN=1, all)

#head(y[row.ix,])
#dim(y[row.ix,])
write.table(y[row.ix,], file=out.files[i], row.names=F, col.names=F, quote=F,
sep="\t")
}

```

```

==> ./sanchari/j432_j446/annotateSites.r <==
library(GenomicFeatures)
library(BSgenome.Hsapiens.UCSC.hg19)
library(VariantAnnotation)
library(TxDb.Hsapiens.UCSC.hg19.knownGene) # for annotation
library(org.Hs.eg.db)
library("biomaRt")
library("stringr")

options(stringsAsFactors=F)

#load up the database utility, find the chrom pos and ids for the significant diff
expressed locatinos
grch37 = useMart(biomart="ENSEMBL_MART_ENSEMBL", host="grch37.ensembl.org",
path="/biomart/martservice", dataset="hsapiens_gene_ensembl")
#grch37 = useMart(biomart="ENSEMBL_MART_ENSEMBL",
host="feb2014.archive.ensembl.org", path="/biomart/martservice",

```

```

dataset="hsapiens_gene_ensembl")

#find the sites with gain/loss hmc from hpne to jd
#are there any matching sites?
#Where do these occur? exons, introns, promoters.

#in depth look at brd4

#over chr19
#> dim(sites.hpne)
#[1] 173149      8
#> dim(sites.jd)
#[1] 200834      8
#> dim(peaks.jd)
#[1] 117180      2
#> dim(peaks.hpne)
#[1] 66119       2

#load in the hmcsites
sites.hpne = read.table("hmcSites/common4_hmcSites_HPNE.txt", header=F)
sites.jd = read.table("hmcSites/common4_hmcSites_JD.txt", header=F)

#sites.hpne = read.table(paste0("hmcSites/hmcSites_HPNE_",chrom, ".txt"), header=T)
#sites.jd = read.table(paste0("hmcSites/hmcSites_JD_", chrom, ".txt"), header=T)
#dim(sites.hpne)
#head(sites.hpne)
#dim(sites.jd)
#
#sites.hpne = read.table("hmcSites/hmcSites_HPNE_all.txt", header=T)
#sites.jd = read.table("hmcSites/hmcSites_JD_all.txt", header=T)

#load in the peak sites from the atac-seq run
peaks.hpne =
read.table("~/hpc_home/projects/sanchari/j455/macs_Chpne_sorted_mdup_Tjd_sorted_mdup/Chpne_sorted_mdup_Tjd_sorted_mdup_summits.bed", header=F)
peaks.jd =
read.table("~/hpc_home/projects/sanchari/j455/macs_Cjd_sorted_mdup_Thpne_sorted_mdup/Cjd_sorted_mdup_Thpne_sorted_mdup_summits.bed", header=F)
peaks.hpne =
read.table("~/hpc_home/projects/sanchari/j455/macs_hpne_sorted_mdup/hpne_sorted_mdup_summits.bed", header=F)
peaks.jd =
read.table("~/hpc_home/projects/sanchari/j455/macs_jd_sorted_mdup/jd_sorted_mdup_summits.bed", header=F)
peaks.hpne = peaks.hpne[,1:2]
peaks.jd = peaks.jd[,1:2]
dim(peaks.jd)
dim(peaks.hpne)

#https://adairama.wordpress.com/2013/02/15/functionally-annotate-snps-and-indels-in-bioconductor/
annotateList <- function(sites){

```

```

#get the chromosomal location of the sites
input = sites[, 1:2]
colnames(input) <- c("chr", "pos")
input$pos      <- as.numeric(as.character(input$pos))

#construct a range for each site.
target <- with(input, GRanges(
  seqnames = Rle(chr),
  ranges    = IRanges(
    pos,
    end=pos,
    names=paste0("rand", 1:nrow(input))
  ),
  strand    = Rle(strand("*"))
))

#find variants for each site
loc <- locateVariants(target, TxDb.Hsapiens.UCSC.hg19.knownGene,
AllVariants())
names(loc) <- NULL
out <- as.data.frame(loc)
out$names <- names(target)[ out$QUERYID ]
out <- out[ , c("names", "seqnames", "start", "end", "LOCATION", "GENEID")]
out <- unique(out)

#convert gene id to gene symbol
Symbol2id <- as.list( org.Hs.egSYMBOL2EG )
id2Symbol <- rep( names(Symbol2id), sapply(Symbol2id, length) )
names(id2Symbol) <- unlist(Symbol2id)

#make sure all entries have been found
x <- unique( with(out, c(levels(GENEID))) )
table( x %in% names(id2Symbol) ) # good, all found

#assign the gene symbol
out$GENESYMBOL <- id2Symbol[ as.character(out$GENEID) ]
out
}

#look at a more conservative list of hmc events
head(sites.hpne)
sum(sites.hpne$pval < 0.001)
sites.hpne.sig = sites.hpne[sites.hpne$pval < 0.001,]
sites.jd.sig   = sites.jd[sites.jd$pval < 0.001,]

#look at a random distribution of sites taken from min/max range of chromosome
sites.rand = sites.jd
max(sites.rand[,2])
sites.rand[,2] = runif(
  nrow(sites.rand),
  min(sites.rand[,2]),
  max(sites.rand[,2]) - min(sites.rand[,2])
)

panno.hpne = annotateList(peaks.hpne)

```

```

panno.jd = annotateList(peaks.jd)

#annoation the hmcSites
#break up long list into multiple queries
#takes a long time
chunk <- function(x,n) split(x, factor(sort(rank(x)%%n)))
ix = chunk(1:nrow(sites.hpne), 10)
anno.hpne = lapply(ix, function(i){
  print (i[1])
  annotateList(sites.hpne[i,])
})
x.hpne=do.call(rbind, anno.hpne)

ix = chunk(1:nrow(sites.jd), 10)
anno.jd = lapply(ix, function(i){
  print (i[1])
  annotateList(sites.jd[i,])
})
x.jd=do.call(rbind, anno.jd)

#save.image("anno_v1.RData")
makePie <- function(x, descr){
  mytable <- table(x[,5])
  #lbls <- paste(names(mytable), "\n", mytable, sep="")
  lbls <- paste(mytable, " (", format(round(100*mytable/sum(mytable), 4),
nsmall=4), "%)", sep="")
  cols = rainbow(length(lbls))
  pie(mytable, labels = lbls, col=cols, main=descr)
  legend("topright", names(mytable), col=cols, pch=15)
  mytable
}

png("pie_hmcHpne_all.png")
makePie(x.hpne, "hmc sites: HPNE")
dev.off()
png("pie_hmcJD_all.png")
makePie(x.jd, "hmc sites: JD")
dev.off()

#how many genes are affected?
head(x.jd)
ugenes.jd = unique(x.jd$GENESYMBOL)
length(ugenes.jd)
ugenes.hpne = unique(x.hpne$GENESYMBOL)
length(ugenes.hpne)

#genes with hmc in one sample, but not the other
length(ugenes.hpne[!(ugenes.hpne %in% ugenes.jd)])
length(ugenes.jd[!(ugenes.jd %in% ugenes.hpne)])

anno.hpne = annotateList(sites.hpne)
anno.jd = annotateList(sites.jd)

```



```

anno.rand = annotateList(sites.rand)
anno.hpne.sig = annotateList(sites.hpne.sig)
anno.jd.sig = annotateList(sites.jd.sig)
dim(sites.hpne)
dim(sites.jd)
dim(sites.hpne.sig)
dim(sites.jd.sig)

#briefly look at hmc events at brd4
#save in bed format, view in igv
ix.1 = which(anno.hpne$GENESYMBOL == "BRD4")
ix.2 = which(anno.jd$GENESYMBOL == "BRD4")
length(ix.1)
length(ix.2)

anno.hpne[ix.1,]
x = anno.hpne[ix.1,2:4]
x = cbind(x, 1, 1)
write.table(file="hmc_brd4_hpne.bed", x=x, col.names=F, row.names=F, quote=F)
x = anno.jd[ix.2,2:4]
x = cbind(x, 1, 1)
write.table(file="hmc_brd4_jd.bed", x=x, col.names=F, row.names=F, quote=F)
#add a header to each bed file
# track name=test1 description="hmc" visibility=2

png("atacseq_hpne.png")
mytable <- table(anno.hpne[,5])
lbls <- paste(names(mytable), "\n", mytable, sep="")
pie(mytable, labels = lbls,
     main="ATACseq: HPNE")
dev.off()

png("atacseq_jd.png")
mytable <- table(anno.jd[,5])
lbls <- paste(names(mytable), "\n", mytable, sep="")
pie(mytable, labels = lbls,
     main="ATACseq: JD")
dev.off()

#par(mfcol=c(1, 2))
png("hmc_chr19_hpne.png")
mytable <- table(anno.hpne[,5])
lbls <- paste(names(mytable), "\n", mytable, sep="")
pie(mytable, labels = lbls,
     main="chr19 HMC: HPNE")
dev.off()

png("hmc_chr19_jd.png")
mytable <- table(anno.jd[,5])
lbls <- paste(names(mytable), "\n", mytable, sep="")
pie(mytable, labels = lbls,
     main="chr19 HMC: JD")
dev.off()

png("hmc_chr19_hpneSig.png")
mytable <- table(anno.hpne.sig[,5])

```

```

lbls <- paste(names(mytable), "\n", mytable, sep="")
pie(mytable, labels = lbls,
    main="chr19 HMC: HPNEsig")
dev.off()

png("hmc_chr19_jdSig.png")
mytable <- table(anno.jd.sig[,5])
lbls <- paste(names(mytable), "\n", mytable, sep="")
pie(mytable, labels = lbls,
    main="chr19 HMC: JDsig")
dev.off()

png("hmc_chr19_random.png")
mytable <- table(anno.rand[,5])
lbls <- paste(names(mytable), "\n", mytable, sep="")
pie(mytable, labels = lbls,
    main="chr19 HMC: random")
dev.off()

#doesn't look like there's much differenc in percentage
#on exonic/intron/promoter regions between hpne, jd
#random sites have slighter more intergenic regions

#might have to filter out some of the hmc sites based
#on direction of the gene
#wehther the reference base is C->T or G->A

#maybe look at the mutation impact factors?
#with snpEff?
#or with VEP

#Lets look at the hmc sites at brd4
#prepare teh vep file

sites = anno.hpne[ix.1,2:4]

anno.hpne[ix.1,]
x = anno.hpne[ix.1,2:4]

x = cbind(x, 1, 1)
write.table(file="hmc_brd4_hpne.bed", x=x, col.names=F, row.names=F, quote=F)
x = anno.jd[ix.2,2:4]

dat =
GRanges(seqnames=rep('chr17', 3), ranges=IRanges(start=c(45229228, 45229234, 45234706),
width=1))
varallele = DNASTringSet(c('C', 'C', 'C'))
db = TxDb.Hsapiens.UCSC.hg19.knownGene

results = predictCoding(dat, db, Hsapiens, varallele)

sites = sites.hpne

```

```
input = sites[, 1:2]
colnames(input) <- c("chr", "pos")
input$pos <- as.numeric(as.character(input$pos))
input = input[1:3000,]
```

```
target <- with(input, GRanges(
  seqnames = Rle(chr),
  ranges = IRanges(
    pos,
    width=1,
    names=paste0("rand", 1:nrow(input))
  ),
  strand = Rle(strand("*"))
))
length(target)
varallele = DNASTringSet(rep('C', length(target)))
results = predictCoding(target, db, Hsapiens, varallele)
```

```
#####
```

```
"chromosome_name", "start", "end"
x = list(chromosome_name="19", start="15236836", end="15332543")
```

```
x = head(sites.hpne[,c(1,2,2)], 300)
x = list(chromosome_name=gsub(x[,1], pat="chr(.*)", rep="\1", perl=T),
start=x[,2], end=x[,3])
x = getBM(attributes=c("ensembl_gene_id", "hgnc_symbol", "chromosome_name",
"start_position", "end_position", "go_biological_process_linkage_type"), filters =
c("chromosome_name", "start", "end"), values = x, mart=grch37)
```

```
==> ./sanchari/j432_j446/commands3_percHist.sh <==
#find the perctages of hmc at each selected site
```

```
cat hmcSites/hmcSites_JD_all.txt | awk '{print $5/$6 - $3/$4}' > hmcPerc_JD.txt
cat hmcSites/hmcSites_HPNE_all.txt | awk '{print $5/$6 - $3/$4}' > hmcPerc_HPNE.txt
```

```
#R code
x = read.table("hmcPerc_JD.txt")
x = x[,1]
png("hmcPerc_JD.png")
hist(x, 100, main="hmC Percentage of Selected Sites: JD")
dev.off()
```

```
x = read.table("hmcPerc_HPNE.txt")
x = x[,1]
png("hmcPerc_HPNE.png")
hist(x, 100, main="hmC Percentage of Selected Sites: HPNE")
dev.off()
```

```
join <(zcat conversionCounts/HPNE_BS_22.txt.gz | cut -f2-4) <(zcat
conversionCounts/HPNE_0xBS_22.txt.gz | cut -f2-4) \
```

```
| awk '{if ($3 >= 4 && $5 >= 4) print $4/$5 - $2/$3}' > commonPerc_HPNE22.txt
```

```
#r code
x = read.table("commonPerc_HPNE22.txt")
x = x[,1]
png("commonPerc_HPNE22.png")
hist(x, 100, main="hmC Percentage of Common Sites: HPNE chr22")
dev.off()
```

```
==> ./sanchari/j432_j446/findHmcSites.sh <==
```

```
#!/bin/bash
#$ -cwd
#$ -j n
#$ -l h_vmem=1G
#$ -pe smp 1
#$ -S /bin/bash
#$ -m e
#   #$ -M kith.pradhan@einstein.yu.edu
module load python/2.7.8/gcc.4.4.7
module load scipy/0.14.0/python.2.7.8
```

```
oxFile=$1
oxbsFile=$2
outFile=$3
```

```
python findHmcSites.py $oxFile $oxbsFile $outFile
```

```
==> ./sanchari/j432_j446/annotateSites_mc.r <==
```

```
library(GenomicFeatures)
library(BSgenome.Hsapiens.UCSC.hg19)
library(VariantAnnotation)
library(TxDb.Hsapiens.UCSC.hg19.knownGene) # for annotation
library(org.Hs.eg.db)
library("biomaRt")
library("stringr")
```

```
options(stringsAsFactors=F)
```

```
#load up the database utility, find the chrom pos and ids for the significant diff
expressed locatinos
grch37 = useMart(biomart="ENSEMBL_MART_ENSEMBL", host="grch37.ensembl.org",
path="/biomart/martservice", dataset="hsapiens_gene_ensembl")
#grch37 = useMart(biomart="ENSEMBL_MART_ENSEMBL",
host="feb2014.archive.ensembl.org", path="/biomart/martservice",
dataset="hsapiens_gene_ensembl")
```

```
#find the sites with gain/loss hmc from hpne to jd
```

```

#are there any matching sites?
#Where do these occur? exons, introns, promoters.

#in depth look at brd4

#over chr19
#> dim(sites.hpne)
#[1] 173149      8
#> dim(sites.jd)
#[1] 200834      8
#> dim(peaks.jd)
#[1] 117180      2
#> dim(peaks.hpne)
#[1] 66119       2

#load in the hmcsites
sites.hpne = read.table("hpc_mcSites/common4_mcSites_HPNE.txt", header=F)
sites.jd = read.table("hpc_mcSites/common4_mcSites_JD.txt", header=F)

#sites.hpne = read.table(paste0("hmcSites/hmcSites_HPNE_",chrom, ".txt"), header=T)
#sites.jd = read.table(paste0("hmcSites/hmcSites_JD_", chrom, ".txt"), header=T)
#dim(sites.hpne)
#head(sites.hpne)
#dim(sites.jd)
#
#sites.hpne = read.table("hmcSites/hmcSites_HPNE_all.txt", header=T)
#sites.jd = read.table("hmcSites/hmcSites_JD_all.txt", header=T)

#https://adairama.wordpress.com/2013/02/15/functionally-annotate-snps-and-indels-
in-bioconductor/
annotateList <- function(sites){

  #get the chromosomal location of the sites
  input = sites[, 1:2]
  colnames(input) <- c("chr", "pos")
  input$pos      <- as.numeric(as.character(input$pos))

  #construct a range for each site.
  target <- with(input, GRanges(
    seqnames = Rle(chr),
    ranges    = IRanges(
      pos,
      end=pos,
      names=paste0("rand", 1:nrow(input))
    ),
    strand    = Rle(strand("*"))
  ))

  #find variants for each site
  loc <- locateVariants(target, TxDb.Hsapiens.UCSC.hg19.knownGene,
AllVariants())
  names(loc) <- NULL
}

```

```

out <- as.data.frame(loc)
out$names <- names(target)[ out$QUERYID ]
out <- out[ , c("names", "seqnames", "start", "end", "LOCATION", "GENEID")]
out <- unique(out)

#convert gene id to gene symbol
Symbol2id <- as.list( org.Hs.egSYMBOL2EG )
id2Symbol <- rep( names(Symbol2id), sapply(Symbol2id, length) )
names(id2Symbol) <- unlist(Symbol2id)

#make sure all entries have been found
x <- unique( with(out, c(levels(GENEID))) )
table( x %in% names(id2Symbol) ) # good, all found

#assign the gene symbol
out$GENESYMBOL <- id2Symbol[ as.character(out$GENEID) ]
out
}

```

```

#look at a random distribution of sites taken from min/max range of chromosome
sites.rand = sites.jd
max(sites.rand[,2])
sites.rand[,2] = runif(
  nrow(sites.rand),
  min(sites.rand[,2]),
  max(sites.rand[,2]) - min(sites.rand[,2])
)

```

```

#break this up...use just 10% of the sites
#to speed things up
#annoation the mcSites
#break up long list into multiple queries
#takes a long time
chunk <- function(x,n) split(x, factor(sort(rank(x)%%n)))
P = 0.1
ix.small = sort(sample(1:nrow(sites.hpne), nrow(sites.hpne)*P))
smallsites.hpne = sites.hpne[ix.small,]
ix = chunk(1:nrow(smallsites.hpne), 10)
anno.hpne = lapply(ix, function(i){
  print (i[1])
  annotateList(smallsites.hpne[i,])
})
x.hpne=do.call(rbind, anno.hpne)

ix.small = sort(sample(1:nrow(sites.jd), nrow(sites.jd)*P))
smallsites.jd = sites.jd[ix.small,]
ix = chunk(1:nrow(smallsites.jd), 10)
anno.jd = lapply(ix, function(i){
  print (i[1])
  annotateList(smallsites.jd[i,])
})
x.jd=do.call(rbind, anno.jd)

save.image("mc_anno_v1.RData")

```

```

makePie <- function(x, descr){
  mytable <- table(x[,5])
  #lbls <- paste(names(mytable), "\n", mytable, sep="")
  lbls <- paste(mytable, " (", format(round(100*mytable/sum(mytable), 4),
nsmall=4), "%)", sep="")
  cols = rainbow(length(lbls))
  pie(mytable, labels = lbls, col=cols, main=descr)
  legend("topright", names(mytable), col=cols, pch=15)
  mytable
}

png("pie_mc_Hpne_all.png")
makePie(x.hpne, "HPNE mc sites")
dev.off()
png("pie_mc_JD_all.png")
makePie(x.jd, "JD mc sites")
dev.off()

#how many genes are affected?
head(x.jd)
ugenes.jd = unique(x.jd$GENESYMBOL)
length(ugenes.jd)
ugenes.hpne = unique(x.hpne$GENESYMBOL)
length(ugenes.hpne)

#genes with hmc in one sample, but not the other
length(ugenes.hpne[!(ugenes.hpne %in% ugenes.jd)])
length(ugenes.jd[!(ugenes.jd %in% ugenes.hpne)])

anno.hpne = annotateList(sites.hpne)
anno.jd = annotateList(sites.jd)
anno.rand = annotateList(sites.rand)
anno.hpne.sig = annotateList(sites.hpne.sig)
anno.jd.sig = annotateList(sites.jd.sig)
dim(sites.hpne)
dim(sites.jd)
dim(sites.hpne.sig)
dim(sites.jd.sig)

#briefly look at hmc events at brd4
#save in bed format, view in igv
ix.1 = which(anno.hpne$GENESYMBOL == "BRD4")
ix.2 = which(anno.jd$GENESYMBOL == "BRD4")
length(ix.1)
length(ix.2)

anno.hpne[ix.1,]
x = anno.hpne[ix.1,2:4]
x = cbind(x, 1, 1)
write.table(file="hmc_brd4_hpne.bed", x=x, col.names=F, row.names=F, quote=F)
x = anno.jd[ix.2,2:4]
x = cbind(x, 1, 1)

```

```

write.table(file="hmc_brd4_jd.bed", x=x, col.names=F, row.names=F, quote=F)
#add a header to each bed file
# track name=test1 description="hmc" visibility=2

png("atacseq_hpne.png")
mytable <- table(panno.hpne[,5])
lbls <- paste(names(mytable), "\n", mytable, sep="")
pie(mytable, labels = lbls,
     main="ATACseq: HPNE")
dev.off()

png("atacseq_jd.png")
mytable <- table(panno.jd[,5])
lbls <- paste(names(mytable), "\n", mytable, sep="")
pie(mytable, labels = lbls,
     main="ATACseq: JD")
dev.off()

#par(mfcol=c(1, 2))
png("hmc_chr19_hpne.png")
mytable <- table(anno.hpne[,5])
lbls <- paste(names(mytable), "\n", mytable, sep="")
pie(mytable, labels = lbls,
     main="chr19 HMC: HPNE")
dev.off()

png("hmc_chr19_jd.png")
mytable <- table(anno.jd[,5])
lbls <- paste(names(mytable), "\n", mytable, sep="")
pie(mytable, labels = lbls,
     main="chr19 HMC: JD")
dev.off()

png("hmc_chr19_hpneSig.png")
mytable <- table(anno.hpne.sig[,5])
lbls <- paste(names(mytable), "\n", mytable, sep="")
pie(mytable, labels = lbls,
     main="chr19 HMC: HPNEsig")
dev.off()

png("hmc_chr19_jdSig.png")
mytable <- table(anno.jd.sig[,5])
lbls <- paste(names(mytable), "\n", mytable, sep="")
pie(mytable, labels = lbls,
     main="chr19 HMC: JDsig")
dev.off()

png("hmc_chr19_random.png")
mytable <- table(anno.rand[,5])
lbls <- paste(names(mytable), "\n", mytable, sep="")
pie(mytable, labels = lbls,
     main="chr19 HMC: random")
dev.off()

#doesn't look like there's much differenc in percentage
#on exonic/intron/promoter regions between hpne, jd
#random sites have slighter more intergenic regions

```



```

#might have to filter out some of the hmc sites based
#on direction of the gene
#whether the reference base is C->T or G->A

#maybe look at the mutation impact factors?
#with snpEff?
#or with VEP

#Lets look at the hmc sites at brd4
#prepare teh vep file

sites = anno.hpne[ix.1,2:4]

anno.hpne[ix.1,]
x = anno.hpne[ix.1,2:4]

x = cbind(x, 1, 1)
write.table(file="hmc_brd4_hpne.bed", x=x, col.names=F, row.names=F, quote=F)
x = anno.jd[ix.2,2:4]

dat =
GRanges(seqnames=rep('chr17',3), ranges=IRanges(start=c(45229228,45229234,45234706),
width=1))
varallele = DNASTringSet(c('C','C','C'))
db = TxDb.Hsapiens.UCSC.hg19.knownGene

results = predictCoding(dat,db,Hsapiens,varallele)

sites = sites.hpne
input = sites[, 1:2]
colnames(input) <- c("chr", "pos")
input$pos <- as.numeric(as.character(input$pos))
input = input[1:3000,]

target <- with(input, GRanges(
  seqnames = Rle(chr),
  ranges = IRanges(
    pos,
    width=1,
    names=paste0("rand", 1:nrow(input))
  ),
  strand = Rle(strand("*"))
))
length(target)
varallele = DNASTringSet(rep('C',length(target)))
results = predictCoding(target,db,Hsapiens,varallele)

```

```
#####
"chromosome_name", "start", "end"
x = list(chromosome_name="19", start="15236836", end="15332543")

x = head(sites.hpne[,c(1,2,2)], 300)
x = list(chromosome_name=gsub(x[,1], pat="chr(.*)", rep="\\1", perl=T),
start=x[,2], end=x[,3])
x = getBM(attributes=c("ensembl_gene_id", "hgnc_symbol", "chromosome_name",
"start_position", "end_position", "go_biological_process_linkage_type"), filters =
c("chromosome_name", "start", "end"), values = x, mart=grch37)

==> ./sanchari/j432_j446/annotateSites_fig1.r <==
library(GenomicFeatures)
library(BSgenome.Hsapiens.UCSC.hg19)
library(VariantAnnotation)
library(TxDb.Hsapiens.UCSC.hg19.knownGene) # for annotation
library(org.Hs.eg.db)
library("biomaRt")
library("stringr")

options(stringsAsFactors=F)

#load up the database utility, find the chrom pos and ids for the significant diff
expressed locatinos
grch37 = useMart(biomart="ENSEMBL_MART_ENSEMBL", host="grch37.ensembl.org",
path="/biomart/martservice", dataset="hsapiens_gene_ensembl")
#grch37 = useMart(biomart="ENSEMBL_MART_ENSEMBL",
host="feb2014.archive.ensembl.org", path="/biomart/martservice",
dataset="hsapiens_gene_ensembl")

#https://adairama.wordpress.com/2013/02/15/functionally-annotate-snps-and-indels-
in-bioconductor/
annotateList <- function(sites){

  #get the chromosomal location of the sites
  input = sites[, 1:2]
  colnames(input) <- c("chr", "pos")
  input$pos <- as.numeric(as.character(input$pos))

  #construct a range for each site.
  target <- with(input, GRanges(
    seqnames = Rle(chr),
    ranges = IRanges(
      pos,
      end=pos,
      names=paste0("rand", 1:nrow(input))
    ),
    strand = Rle(strand("*"))
  ))

  #find variants for each site
  loc <- locateVariants(target, TxDb.Hsapiens.UCSC.hg19.knownGene,
```

```

AllVariants()
  names(loc) <- NULL
  out <- as.data.frame(loc)
  out$names <- names(target)[ out$QUERYID ]
  out <- out[ , c("names", "seqnames", "start", "end", "LOCATION", "GENEID")]
  out <- unique(out)

  #convert gene id to gene symbol
  Symbol2id <- as.list( org.Hs.egSYMBOL2EG )
  id2Symbol <- rep( names(Symbol2id), sapply(Symbol2id, length) )
  names(id2Symbol) <- unlist(Symbol2id)

  #make sure all entries have been found
  x <- unique( with(out, c(levels(GENEID))) )
  table( x %in% names(id2Symbol) ) # good, all found

  #assign the gene symbol
  out$GENESYMBOL <- id2Symbol[ as.character(out$GENEID) ]
  out
}

```

```

makePie <- function(x, descr){
  mytable <- table(x[,5])
  #lbls <- paste(names(mytable), "\n", mytable, sep="")
  lbls <- paste(mytable, " (", format(round(100*mytable/sum(mytable), 4),
nsmall=4), "%)", sep="")
  cols = rainbow(length(lbls))
  pie(mytable, labels = lbls, col=cols, main=descr)
  legend("topright", names(mytable), col=cols, pch=15)
  mytable
}

```

```

#load in the sites
fo1 = "/home/kpradhan/Desktop/projects/sanchari/homer_20160708"
atac.hpne = read.table(paste0(fo1, "/atac_hpne.bed"), header=F)
atac.jd = read.table(paste0(fo1, "/atac_jd.bed"), header=F)
atac.hpne.only = read.table(paste0(fo1, "/atac_hpne_only.bed"), header=F)
atac.jd.only = read.table(paste0(fo1, "/atac_jd_only.bed"), header=F)

hmc.hpne.only = read.table(paste0(fo1, "/hmc_hpne_only.bed"), header=F)
hmc.jd.only = read.table(paste0(fo1, "/hmc_jd_only.bed"), header=F)

mc.hpne.only = read.table(paste0(fo1, "/mc_hpne_only.bed"), header=F)
mc.jd.only = read.table(paste0(fo1, "/mc_jd_only.bed"), header=F)

atac.hpne.anno = annotateList(atac.hpne)
atac.jd.anno = annotateList(atac.jd)

atac.hpne.only.anno = annotateList(atac.hpne.only)
atac.jd.only.anno = annotateList(atac.jd.only)
hmc.hpne.only.anno = annotateList(hmc.hpne.only)
hmc.jd.only.anno = annotateList(hmc.jd.only)
mc.hpne.only.anno = annotateList(mc.hpne.only)
mc.jd.only.anno = annotateList(mc.jd.only)

```

```

png("pie_atac_hpne.png")
makePie(atac.hpne.anno, "atac_hpne")
dev.off()
png("pie_atac_jd.png")
makePie(atac.jd.anno, "atac_jd")
dev.off()

png("pie_atac_hpne_only.png")
makePie(atac.hpne.only.anno, "atac_hpne_only")
dev.off()
png("pie_atac_jd_only.png")
makePie(atac.jd.only.anno, "atac_jd_only")
dev.off()

png("pie_hmc_hpne_only.png")
makePie(hmc.hpne.only.anno, "hmc_hpne_only")
dev.off()
png("pie_hmc_jd_only.png")
makePie(hmc.jd.only.anno, "hmc_jd_only")
dev.off()

png("pie_mc_hpne_only.png")
makePie(mc.hpne.only.anno, "mc_hpne_only")
dev.off()
png("pie_mc_jd_only.png")
makePie(mc.jd.only.anno, "mc_jd_only")
dev.off()

```

```

#look at a random distribution of sites taken from min/max range of chromosome
sites.rand = sites.jd
max(sites.rand[,2])
sites.rand[,2] = runif(
  nrow(sites.rand),
  min(sites.rand[,2]),
  max(sites.rand[,2]) - min(sites.rand[,2])
)

```

```

#break this up...use just 10% of the sites
#to speed things up
#annoation the mcSites
#break up long list into multiple queries
#takes a long time
chunk <- function(x,n) split(x, factor(sort(rank(x)%%n)))

```

```

P = 0.1
ix.small = sort(sample(1:nrow(sites.hpne), nrow(sites.hpne)*P))
smallsites.hpne = sites.hpne[ix.small,]
ix = chunk(1:nrow(smallsites.hpne), 10)
anno.hpne = lapply(ix, function(i){
  print (i[1])
  annotateList(smallsites.hpne[i,])
})
x.hpne=do.call(rbind, anno.hpne)

ix.small = sort(sample(1:nrow(sites.jd), nrow(sites.jd)*P))
smallsites.jd = sites.jd[ix.small,]
ix = chunk(1:nrow(smallsites.jd), 10)
anno.jd = lapply(ix, function(i){
  print (i[1])
  annotateList(smallsites.jd[i,])
})
x.jd=do.call(rbind, anno.jd)

save.image("mc_anno_v1.RData")

png("pie_mc_Hpne_all.png")
makePie(x.hpne, "HPNE mc sites")
dev.off()
png("pie_mc_JD_all.png")
makePie(x.jd, "JD mc sites")
dev.off()

#how many genes are affected?
head(x.jd)
ugenes.jd = unique(x.jd$GENESYMBOL)
length(ugenes.jd)
ugenes.hpne = unique(x.hpne$GENESYMBOL)
length(ugenes.hpne)

#genes with hmc in one sample, but not the other
length(ugenes.hpne[!(ugenes.hpne %in% ugenes.jd)])
length(ugenes.jd[!(ugenes.jd %in% ugenes.hpne)])

anno.hpne = annotateList(sites.hpne)
anno.jd = annotateList(sites.jd)
anno.rand = annotateList(sites.rand)
anno.hpne.sig = annotateList(sites.hpne.sig)
anno.jd.sig = annotateList(sites.jd.sig)
dim(sites.hpne)
dim(sites.jd)
dim(sites.hpne.sig)
dim(sites.jd.sig)

#briefly look at hmc events at brd4
#save in bed format, view in igv
ix.1 = which(anno.hpne$GENESYMBOL == "BRD4")

```

```

ix.2 = which(anno.jd$GENESYMBOL == "BRD4")
length(ix.1)
length(ix.2)

anno.hpne[ix.1,]
x = anno.hpne[ix.1,2:4]
x = cbind(x, 1, 1)
write.table(file="hmc_brd4_hpne.bed", x=x, col.names=F, row.names=F, quote=F)
x = anno.jd[ix.2,2:4]
x = cbind(x, 1, 1)
write.table(file="hmc_brd4_jd.bed", x=x, col.names=F, row.names=F, quote=F)
#add a header to each bed file
# track name=test1 description="hmc" visibility=2

png("atacseq_hpne.png")
mytable <- table(panno.hpne[,5])
lbls <- paste(names(mytable), "\n", mytable, sep="")
pie(mytable, labels = lbls,
     main="ATACseq: HPNE")
dev.off()

png("atacseq_jd.png")
mytable <- table(panno.jd[,5])
lbls <- paste(names(mytable), "\n", mytable, sep="")
pie(mytable, labels = lbls,
     main="ATACseq: JD")
dev.off()

#par(mfcol=c(1, 2))
png("hmc_chr19_hpne.png")
mytable <- table(anno.hpne[,5])
lbls <- paste(names(mytable), "\n", mytable, sep="")
pie(mytable, labels = lbls,
     main="chr19 HMC: HPNE")
dev.off()

png("hmc_chr19_jd.png")
mytable <- table(anno.jd[,5])
lbls <- paste(names(mytable), "\n", mytable, sep="")
pie(mytable, labels = lbls,
     main="chr19 HMC: JD")
dev.off()

png("hmc_chr19_hpneSig.png")
mytable <- table(anno.hpne.sig[,5])
lbls <- paste(names(mytable), "\n", mytable, sep="")
pie(mytable, labels = lbls,
     main="chr19 HMC: HPNEsig")
dev.off()

png("hmc_chr19_jdSig.png")
mytable <- table(anno.jd.sig[,5])
lbls <- paste(names(mytable), "\n", mytable, sep="")
pie(mytable, labels = lbls,
     main="chr19 HMC: JDsig")
dev.off()

```

```

png("hmc_chr19_random.png")
mytable <- table(anno.rand[,5])
lbls <- paste(names(mytable), "\n", mytable, sep="")
pie(mytable, labels = lbls,
    main="chr19 HMC: random")
dev.off()

#doesn't look like there's much differenc in percentage
#on exonic/intron/promoter regions between hpne, jd
#random sites have slighter more intergenic regions

#might have to filter out some of the hmc sites based
#on direction of the gene
#wehther the reference base is C->T or G->A

#maybe look at the mutation impact factors?
#with snpEff?
#or with VEP

#Lets look at the hmc sites at brd4
#prepare teh vep file

sites = anno.hpne[ix.1,2:4]

anno.hpne[ix.1,]
x = anno.hpne[ix.1,2:4]

x = cbind(x, 1, 1)
write.table(file="hmc_brd4_hpne.bed", x=x, col.names=F, row.names=F, quote=F)
x = anno.jd[ix.2,2:4]

dat =
GRanges(seqnames=rep('chr17',3), ranges=IRanges(start=c(45229228,45229234,45234706),
width=1))
varallele = DNASTringSet(c('C','C','C'))
db = TxDb.Hsapiens.UCSC.hg19.knownGene

results = predictCoding(dat,db,Hsapiens,varallele)

sites = sites.hpne
input = sites[, 1:2]
colnames(input) <- c("chr", "pos")
input$pos <- as.numeric(as.character(input$pos))
input = input[1:3000,]

target <- with(input, GRanges(
    seqnames = Rle(chr),
    ranges = IRanges(
        pos,
        width=1,
        names=paste0("rand", 1:nrow(input))
    ),
),

```

```

strand = Rle(strand("*"))
))
length(target)
varallele = DNASTringSet(rep('C',length(target)))
results = predictCoding(target,db,Hsapiens,varallele)

#####
"chromosome_name", "start", "end"
x = list(chromosome_name="19", start="15236836", end="15332543")

x = head(sites.hpne[,c(1,2,2)], 300)
x = list(chromosome_name=gsub(x[,1], pat="chr(.*)", rep="\1", perl=T),
start=x[,2], end=x[,3])
x = getBM(attributes=c("ensembl_gene_id", "hgnc_symbol", "chromosome_name",
"start_position", "end_position", "go_biological_process_linkage_type"), filters =
c("chromosome_name", "start", "end"), values = x, mart=grch37)

==> ./sanchari/j432_j446/findMcSites_stream.r <==
#!/usr/bin/env Rscript

options(stringsAsFactors=F)

#command line arguments
args = commandArgs(trailingOnly=TRUE)
f.bs = args[1]
f.oxbs = args[2]
f.hmc = args[3]
#f.bs = "conversionCounts/HPNE_BS_22.txt.gz"
#f.oxbs = "conversionCounts/HPNE_OxBS_22.txt.gz"
#f.hmc = "hmcSites_HPNE_22.txt"
#f.hmc = "test.txt"

print(f.bs)
print(f.oxbs)
print(f.hmc)

#BS
#c -> t
#5mc -> c
#5hmc -> c
#
#oxBS
#c -> t
#5mc -> c
#5hmc -> t

#we want to find the sites with hmc
#low conversion in BS
#high conversion in oxBS

#candidate sites should have
#conversion rate in Bs below 50%

```



```

#conversion rate in oxBs above 50%

#instead of loading everything in at once
#read and process line by line
con1 = pipe(paste0("zcat ", f.bs))
open(con1, "r")
con2 = pipe(paste0("zcat ", f.oxbs))
open(con2, "r")

#start the file pointer at the beginning
x1 = read.table(textConnection(readLines(con1, n=1)))
x2 = read.table(textConnection(readLines(con2, n=1)))

#keep processing line by line until there's an error
try({while(T){
  #we should only be working with a single chrom
  if (x1[1,1] != x2[1,1]){
    break
  }

  #matching site, process and print
  if (x1[1,2] == x2[1,2]){
    x = merge(x1, x2, by.x=1, by.y=1)
    v = as.numeric(x[1, c("V3.x", "V4.x", "V3.y", "V4.y")])

    #if both files have at least 4 reads
    #and both have a 0 conversion rate
    #if (v[1] == 0 && v[2] >= 4 && v[3] == 0 && v[4] >= 4){ #this is
incorrect
      #v1 is the # of unconverted reads of file1, v2 total file1
      #v3 is the # of unconverted reads of file2, v4 total file2
      if (v[1] == v[2] && v[2] >= 4 && v[3] == v[4] && v[4] >= 4){
        cat(paste(c(as.character(x[1,1:2])), v), file=f.hmc, append=T)
        cat("\n", file=f.hmc, append=T)
      }
      #move both pointers up
      x1 = read.table(textConnection(readLines(con1, 1)))
      x2 = read.table(textConnection(readLines(con2, 1)))
    }else if(x1[1,2] < x2[1,2]){
      #move the bs file pointer up a spot
      x1 = read.table(textConnection(readLines(con1, 1)))
    }else if (x1[1,2] > x2[1,2]){
      #move the oxbs file pointer up a spot
      x2 = read.table(textConnection(readLines(con2, 1)))
    }
  }}, silent=T)

close(con1)
close(con2)

```

```

==> ./sanchari/j432_j446/findHmcSites.py <==
#!/usr/bin/python

```

```

import gzip

```

```

import sys
from scipy.stats import fisher_exact

#ignore sites that have fewer than this many reads in both BS and OxBs
COMMON_THRESH = 4

#file are actually the unconverted counts, NOT converted counts
# they show for each position
# chr pos #meth #total
# here, #meth are the number of unconverted reads!!

file1 = "conversionCounts/JD_BS_17.txt.gz"
file2 = "conversionCounts/JD_OxBs_17.txt.gz"
out = "hmcSites_py/hmcSites_HPNE_22.txt"
out = "hmcSites_py/test_22.txt"
out = "test1/test_17.txt"

file1 = sys.argv[1]
file2 = sys.argv[2]
out = sys.argv[3]

print (file1)
print (file2)
print (out)

fp1 = iter(gzip.open(file1, 'r'))
fp2 = iter(gzip.open(file2, "r"))
fp3 = open(out, "w")

x1 = next(fp1, "").rstrip("\n").split("\t")
x2 = next(fp2, "").rstrip("\n").split("\t")

while(True and len(x1) != 1 and len(x2) != 1):
    if (x1[0] != x2[0]):
        break
    #matching site, process and print
    if (int(x1[1]) == int(x2[1])):
        a = int(x1[2])
        b = int(x1[3]) - a
        c = int(x2[2])
        d = int(x2[3]) - c
        if (a+b >= COMMON_THRESH and c+b >= COMMON_THRESH):
            #r uses conditional MLE method to calc odds ratio
            #so it won't be exactly the same
            #odds, pval = fisher_exact([[a, b], [c, d]])
            #odds, pval = fisher_exact([[a, c], [b, d]], alternative="less") #this
one is incorrect!!
            #we're looking for high methylation in BS
            #and low methylation in OxBs
            odds, pval = fisher_exact([[a, c], [b, d]], alternative="greater")
            #process fisher test pvalue
            #
            #print result
            fp3.write("\t".join(map(str, (x1+x2[2:4] + [odds, pval]))))+"\n")
            #if (odds < 1 and pval < 0.05):
            #    print odds, pval

```

```

        #    print x1
        #    print x2
        #    sigCount = sigCount + 1
        #
        #move both pointers up
        x1 = next(fp1, "").rstrip("\n").split("\t")
        x2 = next(fp2, "").rstrip("\n").split("\t")
    elif(int(x1[1]) < int(x2[1])):
        #move the bs file pointer up a spot
        x1 = next(fp1, "").rstrip("\n").split("\t")
    elif (int(x1[1]) > int(x2[1])):
        #move the oxbs file pointer up a spot
        x2 = next(fp2, "").rstrip("\n").split("\t")

fp1.close()
fp2.close()
fp3.close()

==> ./sanchari/j432_j446/mergeCounts.r <==
list.files(pattern="*.bedGraph")

list.files(pattern="*HPNE-1[-_]BS*")

chrom = "chr10"

x1 = read.table(pipe("grep J432_AHHH5NBCXX_Lane1_ACAGTG_HPNE-
1_BS_merged_sorted_mdup_clip.bedGraph -e \"^chr17\\s\" | cut -f1,2,5,6"))

```
